# Supplementary material for: Asymmetric catalytic alkynylation of thiazolones and azlactones for synthesis of quaternary α-amino acid precursors
Source: Royal Society of Chemistry journal article supplement (doi:10.1039/d1ob00582k), 2021-01-01

## Asymmetric Catalytic Alkynylation of Thiazolones and Azlactones for Synthesis of Quaternary $\alpha$ -Amino Acid Precursors

Beibei Meng, Qian Shi, Yuan Meng, Jie Chen, Weiguo Cao, and Xiaoyu Wu\*

Center for Supramolecular Chemistry and Catalysis and Department of Chemistry, College of  
Sciences, Shanghai University, 99 Shangda Lu, Shanghai 200444, People's Republic of China  
E-mails: wuxy@shu.edu.cn

### *Supporting Information*

|                                                                                                                    |            |
|--------------------------------------------------------------------------------------------------------------------|------------|
| <b>General Information</b> .....                                                                                   | S2         |
| <b>General reaction conditions for alkynylation of thiazolones and azlactones</b> .....                            | S2         |
| <b>Table S1. Screening of the catalysts for the reaction between 1a and 3a</b> .....                               | S3         |
| <b>Table S2. Screening of the solvents for the reaction between 1a and 3a</b> .....                                | S4         |
| <b>Table S3. Screening of the bases for the reaction between 1a and 3a</b> .....                                   | S4         |
| <b>Table S4. Screening of the temperature for the reaction between 1a and 3a</b> .....                             | S5         |
| <b>Table S5. Screening of the catalysts for the reaction between 2a and 3a</b> .....                               | S5         |
| <b>Table S6. Screening of the solvents for the reaction between 2a and 3a</b> .....                                | S6         |
| <b>Table S7. Screening of the bases for the reaction between 2a and 3a</b> .....                                   | S6         |
| <b><math>^1\text{H}</math> NMR, <math>^{13}\text{C}</math> NMR, MS, HPLC and specific rotation data of 4</b> ..... | S7- S15    |
| <b><math>^1\text{H}</math> NMR, <math>^{13}\text{C}</math> NMR, MS, HPLC and specific rotation data of 5</b> ..... | S16- S20   |
| <b>Ring opening of alkynylation product 4aa</b> .....                                                              | S20- S22   |
| <b>Ring opening of alkynylation product 5aa</b> .....                                                              | S22        |
| <b>General procedure for the synthesis of 1b-1i, 1o, 1n</b> .....                                                  | S22- S26   |
| <b>Single crystal X-Ray analysis of chiral 4ah</b> .....                                                           | S26        |
| <b>Preparation of the PTC catalyst</b> .....                                                                       | S26-S29    |
| <b>References</b> .....                                                                                            | S30        |
| <b><math>^1\text{H}</math> NMR, <math>^{13}\text{C}</math> NMR and HPLC spectra of isolated compounds</b> .....    | S31- S103  |
| <b><math>^1\text{H}</math> NMR, <math>^{13}\text{C}</math> NMR spectra of thiazolones</b> .....                    | S104- S114 |
| <b><math>^1\text{H}</math> NMR, <math>^{13}\text{C}</math> NMR spectra of catalysts</b> .....                      | S115- S119 |

**General Information:** Thin-layer chromatography (TLC) carried out on 0.25 mm silica gel plates visualized with UV light and/or by staining with ethanolic phosphomolybdic acid (PMA) or iodine. Flash column chromatography was performed on silica gel (300-400 mesh). NMR spectra were recorded on Bruker Ascend™ (600 MHz), JEOL (400 MHz). Chemical shifts ( $\delta$ ) are given in ppm relative to TMS, coupling constants ( $J$ ) in Hz. Optical rotations were taken on JASCO P1030. High-resolution mass spectra were recorded on Agilent Technologies 6230 TOF LC/MS. Enantiomeric excesses were determined by chiral HPLC using a Shimadzu instrument.

**General reaction conditions for alkylation of thiazolones and azlactones:**

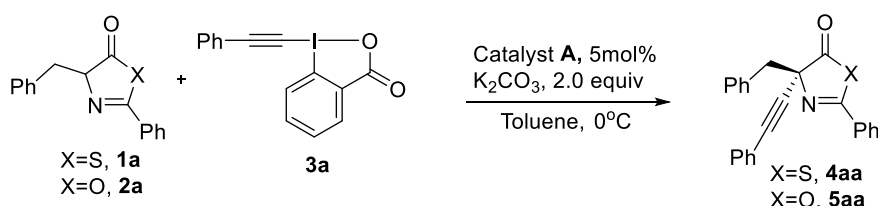

Under an atmosphere of N<sub>2</sub>, a mixture of 4-Benzyl-2-phenylthiazol-5(4H)-one **1a** (26.7 mg, 0.10 mmol) or 4-benzyl-2-phenyloxazol-5(4H)-one **2a** (25.1 mg, 0.10 mmol), 1-(phenylethynyl)-1,2-benziodoxol-3(1*H*)-one **3a** (41.8 mg, 0.12 mmol) and catalyst **A** (3.01 mg, 0.005 mmol) in toluene (1 mL) was cooled to 0 °C, and then K<sub>2</sub>CO<sub>3</sub> (27.6 mg, 0.2 mmol) was added. The resulting mixture was stirred vigorously at the same temperature, and monitored by TLC. Upon the complete consumption of **1a** or **2a**, the reaction mixture was loaded directly onto a column packed with silica gel, and eluted with petroleum ether/ethyl acetate (100/1) to afford the alkylation products **4aa** or **5aa**.

**Table S1.** Screening of the catalysts for the reaction between **1a** and **3a** <sup>[a]</sup>

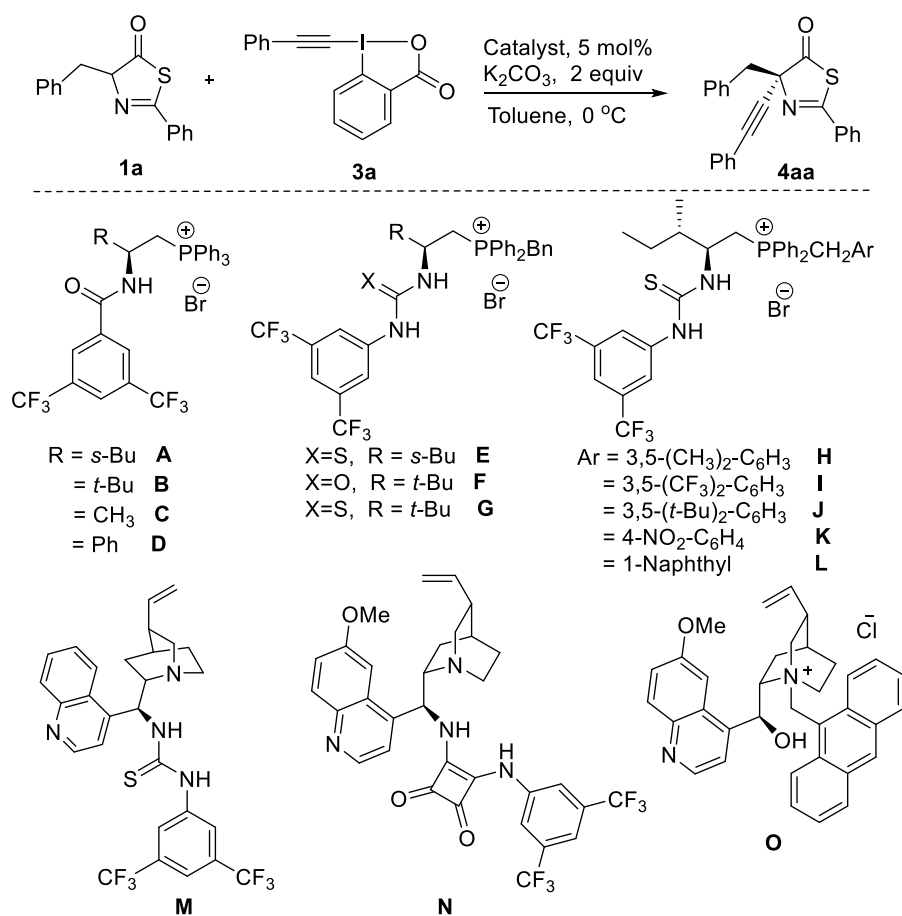

| Entry | Catalyst | Time(h) | yield <sup>[b]</sup> (%) | ee <sup>[c]</sup> (%) |
|-------|----------|---------|--------------------------|-----------------------|
| 1     | <b>A</b> | 12      | 70                       | 31                    |
| 2     | <b>B</b> | 12      | 59                       | 31                    |
| 3     | <b>C</b> | 14      | 63                       | 21                    |
| 4     | <b>D</b> | 18      | 67                       | 21                    |
| 5     | <b>E</b> | 12      | 69                       | 65                    |
| 6     | <b>F</b> | 15      | 56                       | 62                    |
| 7     | <b>G</b> | 12      | 70                       | 65                    |
| 8     | <b>H</b> | 12      | 73                       | 73                    |
| 9     | <b>I</b> | 18      | 64                       | 73                    |
| 10    | <b>J</b> | 12      | 70                       | 80                    |
| 11    | <b>K</b> | 24      | 60                       | 65                    |
| 12    | <b>L</b> | 18      | 69                       | 69                    |
| 13    | <b>M</b> | 18      | 67                       | 22                    |
| 14    | <b>N</b> | 15      | 64                       | 26                    |
| 15    | <b>O</b> | 18      | 65                       | 5                     |

[a] General conditions: **1a** (0.05 mmol, 1.0 equiv), **3a** (0.06 mmol, 1.2 equiv), catalyst (5 mol%), and K<sub>2</sub>CO<sub>3</sub> (0.1 mmol, 2.0 equiv, 13.8 mg) in Toluene (1 mL) at 0 °C; [b] Yield referred to isolated pure **4aa**; [c] Enantiomeric excess of **4aa** was determined by chiral HPLC analysis.

**Table S2.** Screening of the solvents for the reaction between **1a** and **3a** <sup>[a]</sup>
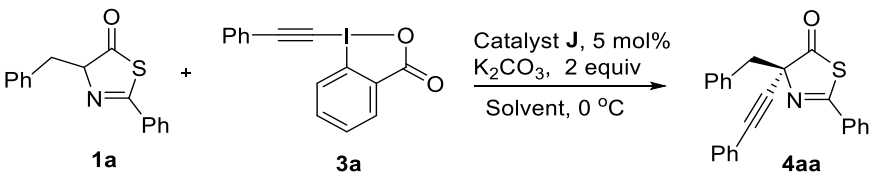

| Entry | Solvent           | Time(h) | yield <sup>[b]</sup> (%) | ee <sup>[c]</sup> (%) |
|-------|-------------------|---------|--------------------------|-----------------------|
| 1     | DCM               | 6       | 65                       | 45                    |
| 2     | PE                | 12      | 66                       | 63                    |
| 3     | CHCl <sub>3</sub> | 10      | 56                       | 70                    |
| 4     | Toluene           | 12      | 79                       | 80                    |
| 5     | THF               | 18      | 71                       | 10                    |
| 6     | MTBE              | 18      | 62                       | 59                    |
| 7     | MeCN              | 24      | 50                       | 15                    |
| 8     | EA                | 14      | 55                       | 11                    |
| 9     | MeOH              | 12      | --                       | --                    |
| 10    | DMF               | 12      | --                       | --                    |
| 11    | PhCl              | 12      | 71                       | 79                    |
| 12    | xylene            | 12      | 70                       | 79                    |

[a] General conditions: **1a** (0.05 mmol, 1.0 equiv), **3a** (0.06 mmol, 1.2 equiv), catalyst **J** (5 mol%), and K<sub>2</sub>CO<sub>3</sub> (0.1 mmol, 2.0 equiv, 13.8 mg) in solvent (1 mL) at 0 °C; [b] Yield referred to isolated pure **4aa**; [c] Enantiomeric excess of **4aa** was determined by chiral HPLC analysis.

**Table S3.** Screening of the bases for the reaction between **1a** and **3a** <sup>[a]</sup>
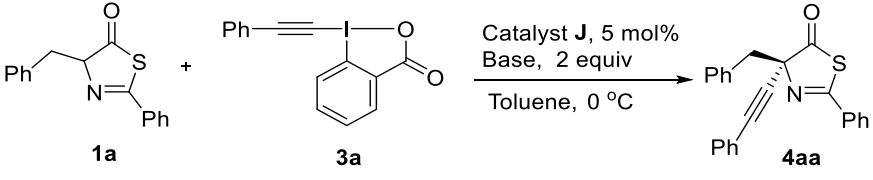

| Entry | Base                                                             | Time(h) | yield <sup>[b]</sup> (%) | ee <sup>[c]</sup> (%) |
|-------|------------------------------------------------------------------|---------|--------------------------|-----------------------|
| 1     | KF                                                               | 16      | 40                       | 79                    |
| 2     | NaOH                                                             | 4       | 45                       | 71                    |
| 3     | CsCO <sub>3</sub>                                                | 4       | 58                       | 75                    |
| 4     | Na <sub>3</sub> PO <sub>4</sub>                                  | 12      | 54                       | 79                    |
| 5     | K <sub>3</sub> PO <sub>4</sub>                                   | 12      | 49                       | 75                    |
| 6     | CH <sub>3</sub> COONa                                            | 12      | trace                    | –                     |
| 7     | Na <sub>2</sub> CO <sub>3</sub>                                  | 12      | 60                       | 81                    |
| 8     | K <sub>3</sub> PO <sub>4</sub> ·3H <sub>2</sub> O                | 6       | 75                       | 83                    |
| 9     | K <sub>2</sub> CO <sub>3</sub>                                   | 12      | 70                       | 80                    |
| 10    | K <sub>3</sub> PO <sub>4</sub> ·3H <sub>2</sub> O <sup>[d]</sup> | 10      | 75                       | 86                    |
| 11    | K <sub>3</sub> PO <sub>4</sub> ·3H <sub>2</sub> O <sup>[e]</sup> | 8       | 80                       | 82                    |
| 12    | K <sub>3</sub> PO <sub>4</sub> ·3H <sub>2</sub> O <sup>[f]</sup> | 8       | 82                       | 81                    |

[a] General conditions: **1a** (0.05 mmol, 1.0 equiv), **3a** (0.06 mmol, 1.2 equiv), catalyst **J** (5 mol%), and base (0.1 mmol, 2.0 equiv) in Toluene (1 mL) at 0 °C; [b] Yield referred to isolated pure **4aa**; [c] Enantiomeric excess of **4aa** was determined by chiral HPLC analysis; [d] K<sub>3</sub>PO<sub>4</sub>·3H<sub>2</sub>O (0.025 mmol, 0.5 equiv); [e] K<sub>3</sub>PO<sub>4</sub>·3H<sub>2</sub>O (0.05 mmol,

1.0 equiv); [f]  $\text{K}_3\text{PO}_4 \cdot 3\text{H}_2\text{O}$  (0.075 mmol, 1.5 equiv).

**Table S4.** Screening of the temperature for the reaction between **1a** and **3a**<sup>[a]</sup>

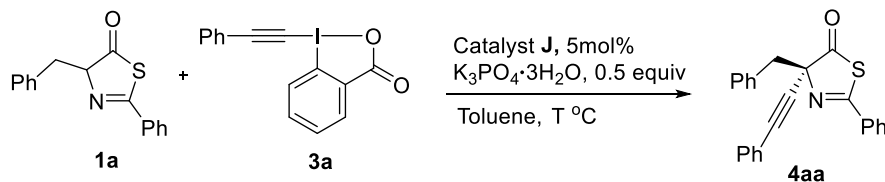

| Entry | T(°C) | time | yield <sup>[b]</sup> (%) | ee <sup>[c]</sup> (%) |
|-------|-------|------|--------------------------|-----------------------|
| 1     | -10   | 18   | 75                       | 85                    |
| 3     | -30   | 24   | 51                       | 80                    |
| 5     | -40   | 24   | 60                       | 79                    |

[a] General conditions: **1a** (0.05 mmol, 1.0 equiv), **3a** (0.06 mmol, 1.2 equiv), catalyst **J** (5 mol%), and  $\text{K}_3\text{PO}_4 \cdot 3\text{H}_2\text{O}$  (0.025 mmol, 0.5 equiv, 6.7 mg) in Toluene (1 mL); [b] Yield referred to isolated pure **4aa**; [c] Enantiomeric excess of **4aa** was determined by chiral HPLC analysis.

**Table S5.** Screening of the catalysts for the reaction between **2a** and **3a**<sup>[a]</sup>

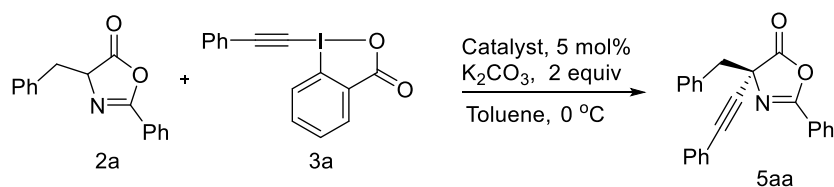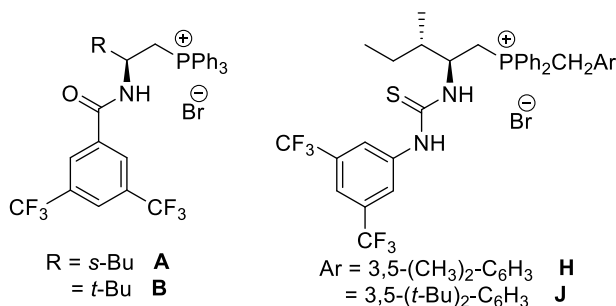

| Entry | Catalyst | Time(h) | yield <sup>[b]</sup> (%) | ee <sup>[c]</sup> (%) |
|-------|----------|---------|--------------------------|-----------------------|
| 1     | <b>A</b> | 36      | 70                       | 23                    |
| 2     | <b>B</b> | 36      | 68                       | 23                    |
| 3     | <b>H</b> | 48      | 70                       | 73                    |
| 4     | <b>J</b> | 48      | 70                       | 51                    |

[a] General conditions: **2a** (0.05 mmol, 1.0 equiv), **3a** (0.06 mmol, 1.2 equiv), catalyst (5 mol%), and  $\text{K}_2\text{CO}_3$  (0.1 mmol, 2.0 equiv, 13.8 mg) in Toluene (1 mL) at 0 °C; [b] Yield referred to isolated pure **5aa**; [c] Enantiomeric excess of **5aa** was determined by chiral HPLC analysis.

**Table S6.** Screening of the solvents for the reaction between **2a** and **3a**<sup>[a]</sup>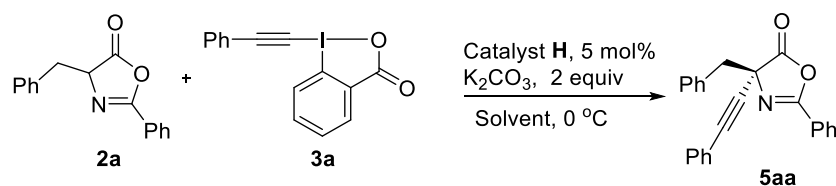

| Entry | Solvent           | Time(h) | yield <sup>[b]</sup> (%) | ee <sup>[c]</sup> (%) |
|-------|-------------------|---------|--------------------------|-----------------------|
| 1     | DCM               | 12      | 82                       | 31                    |
| 2     | PhCl              | 48      | 63                       | 45                    |
| 3     | CHCl <sub>3</sub> | 18      | 80                       | 31                    |
| 4     | Toluene           | 48      | 70                       | 73                    |
| 5     | THF               | 12      | 71                       | 11                    |
| 6     | MeOH              | 12      | --                       | --                    |
| 7     | PhCF <sub>3</sub> | 48      | 70                       | 51                    |

[a] General conditions: **2a** (0.05 mmol, 1.0 equiv), **3a** (0.06 mmol, 1.2 equiv), catalyst **H** (5 mol%), and  $K_2CO_3$  (0.1 mmol, 2.0 equiv, 13.8 mg) in solvent (1 mL) at 0 °C; [b] Yield referred to isolated pure **5aa**; [c] Enantiomeric excess of **5aa** was determined by chiral HPLC analysis.

**Table S7.** Screening of the bases for the reaction between **2a** and **3a**<sup>[a]</sup>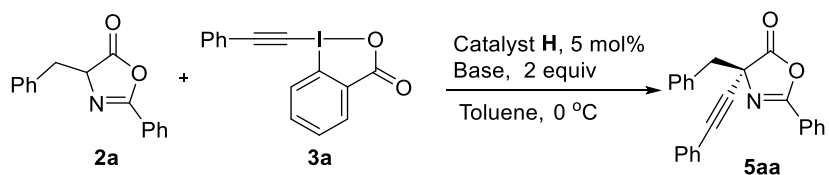

| Entry | Base                                              | Time(h) | yield <sup>[b]</sup> (%) | ee <sup>[c]</sup> (%) |
|-------|---------------------------------------------------|---------|--------------------------|-----------------------|
| 1     | KF                                                | 48      | 61                       | 63                    |
| 2     | NaOH                                              | 1.5     | 85                       | 59                    |
| 3     | CsCO <sub>3</sub>                                 | 1.5     | 85                       | 61                    |
| 4     | Na <sub>3</sub> PO <sub>4</sub>                   | 48      | 70                       | 65                    |
| 5     | K <sub>3</sub> PO <sub>4</sub>                    | 48      | 76                       | 65                    |
| 6     | CH <sub>3</sub> COONa                             | 48      | --                       | --                    |
| 7     | Na <sub>2</sub> CO <sub>3</sub>                   | 48      | 60                       | 67                    |
| 8     | K <sub>3</sub> PO <sub>4</sub> ·3H <sub>2</sub> O | 18      | 81                       | 60                    |
| 9     | DIPEA                                             | 48      | --                       | --                    |
| 10    | K <sub>2</sub> CO <sub>3</sub>                    | 48      | 70                       | 73                    |
| 11    | K <sub>2</sub> CO <sub>3</sub> <sup>[d]</sup>     | 48      | 62                       | 45                    |
| 12    | K <sub>2</sub> CO <sub>3</sub> <sup>[e]</sup>     | 48      | 59                       | 59                    |
| 13    | K <sub>2</sub> CO <sub>3</sub> <sup>[f]</sup>     | 48      | 63                       | 66                    |

[a] General conditions: **2a** (0.05 mmol, 1.0 equiv), **3a** (0.06 mmol, 1.2 equiv), catalyst **H** (5 mol%), and base (0.1 mmol, 2.0 equiv) in Toluene (1 mL) at 0 °C; [b] Yield referred to isolated pure **5aa**; [c] Enantiomeric excess of **5aa** was determined by chiral HPLC analysis; [d]  $K_2CO_3$  (0.025 mmol, 0.5 equiv); [e]  $K_2CO_3$  (0.05 mmol, 1.0 equiv); [f]  $K_2CO_3$  (0.075 mmol, 1.5 equiv).

**<sup>1</sup>H NMR, <sup>13</sup>C NMR, MS, HPLC and specific rotation data of 4**

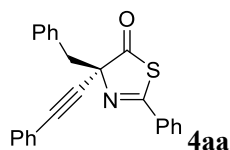

(*R*)-4-benzyl-2-phenyl-4-(phenylethynyl)thiazol-5(4H)-one (**4aa**): following general procedure, **1a** (26.7 mg, 0.1 mmol, 1.0 eq.), **3a** (41.8 mg, 0.12 mmol, 1.2 eq.), catalyst **J** (4.2 mg, 0.005 mmol), was added in toluene (1.0 mL) and then K<sub>3</sub>PO<sub>4</sub>·3H<sub>2</sub>O (13.4 mg, 0.05 mmol) was added; flash chromatography with PE : EA = 100 : 1, light yellow solid, 27.53 mg, 75% yield, 86% ee; <sup>1</sup>H NMR (400 MHz, CDCl<sub>3</sub>) δ 7.79 (d, *J* = 7.4 Hz, 2H), 7.53 (t, *J* = 7.3 Hz, 1H), 7.49 – 7.43 (m, 4H), 7.30 (d, *J* = 7.3 Hz, 2H), 7.27 (dd, *J* = 7.4, 2.1 Hz, 3H), 7.24 – 7.18 (m, 3H), 3.66 (d, *J* = 13.3 Hz, 1H), 3.50 (d, *J* = 13.3 Hz, 1H); <sup>13</sup>C NMR (100 MHz, CDCl<sub>3</sub>) δ 205.32, 165.16, 133.58, 133.11, 132.52, 132.14, 130.93, 128.99, 128.94, 128.36, 128.32, 128.10, 127.50, 121.91, 86.80, 84.91, 83.86, 46.04; HRMS (ESI) Calcd for (C<sub>24</sub>H<sub>18</sub>NOS)<sup>+</sup> [M + H]<sup>+</sup> 368.1104, found 368.1105; [α]<sub>D</sub><sup>20</sup> +17.2 (*c* 0.5, CHCl<sub>3</sub>); HPLC (Daicel CHIRALPAK OD-H, Hexane : Isopropanol = 95 : 5, Flow rate = 0.5 mL/min, λ = 254 nm): t<sub>R</sub> = 11.31 min (minor enantiomer), t<sub>R</sub> = 12.47 min (major enantiomer).

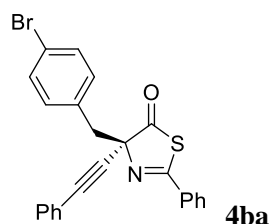

(*R*)-4-(4-bromobenzyl)-2-phenyl-4-(phenylethynyl)thiazol-5(4H)-one (**4ba**): following general procedure, **1b** (34.5 mg, 0.1 mmol, 1.0 eq.), **3a** (41.8 mg, 0.12 mmol, 1.2 eq.), catalyst **J** (4.2 mg, 0.005 mmol), was added in toluene (1.0 mL) and then K<sub>3</sub>PO<sub>4</sub>·3H<sub>2</sub>O (13.4 mg, 0.05 mmol) was added; flash chromatography with PE:EA = 100:1, light yellow solid, 24.5 mg, 55% yield, 67% ee; <sup>1</sup>H NMR (400 MHz, CDCl<sub>3</sub>) δ 7.85 – 7.74 (m, 2H), 7.58 – 7.51 (m, 1H), 7.50 – 7.41 (m, 4H), 7.38 – 7.26 (m, 5H), 7.14 (d, *J* = 8.0 Hz, 2H), 3.58 (d, *J* = 13.3 Hz, 1H), 3.41 (d, *J* = 13.3 Hz, 1H); <sup>13</sup>C NMR (100 MHz, CDCl<sub>3</sub>) δ 205.00, 165.37, 132.95, 132.74, 132.71, 132.56, 132.12, 131.25, 129.09, 129.02, 128.39, 128.36, 121.76, 87.05, 84.62, 83.49, 45.15; HRMS (ESI) calcd for (C<sub>24</sub>H<sub>17</sub>BrNOS)<sup>+</sup> [M + H]<sup>+</sup> 446.0209, found 446.0208; [α]<sub>D</sub><sup>20</sup> +19.8 (*c* 0.5, CHCl<sub>3</sub>); HPLC (Daicel CHIRALPAK OD-H, Hexane : Isopropanol = 95 : 5, Flow rate = 0.5 mL/min, λ = 254 nm): t<sub>R</sub> = 12.80 min (minor enantiomer), t<sub>R</sub> = 14.20 min (major enantiomer).

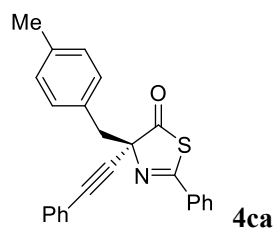

(*R*)-4-(4-methylbenzyl)-2-phenyl-4-(phenylethynyl)thiazol-5(4H)-one (**4ca**): following general procedure: **1c** (28.1 mg, 0.1 mmol, 1.0 eq.), **3a** (41.8 mg, 0.12 mmol, 1.2 eq.), catalyst **J** (4.2 mg, 0.005 mmol), was added in toluene (1.0 mL) and then K<sub>3</sub>PO<sub>4</sub>·3H<sub>2</sub>O (13.4 mg, 0.05 mmol) was

added; flash chromatography with PE : EA = 100 : 1, light yellow solid, 27.4 mg, 72% yield, 79% ee;  $^1\text{H NMR}$  (400 MHz,  $\text{CDCl}_3$ )  $\delta$  7.80 (d,  $J = 7.8$  Hz, 2H), 7.57 – 7.50 (m, 1H), 7.46 (dd,  $J = 9.6, 5.4$  Hz, 4H), 7.34 – 7.26 (m, 3H), 7.15 (d,  $J = 7.9$  Hz, 2H), 7.03 (d,  $J = 7.9$  Hz, 2H), 3.62 (d,  $J = 13.3$  Hz, 1H), 3.47 (d,  $J = 13.3$  Hz, 1H), 2.27 (s, 3H);  $^{13}\text{C NMR}$  (100 MHz,  $\text{CDCl}_3$ )  $\delta$  205.27, 165.01, 137.07, 133.22, 132.46, 132.14, 130.77, 130.52, 128.92, 128.82, 128.38, 128.30, 121.99, 86.73, 85.06, 84.02, 45.67, 21.22; HRMS (ESI) calcd for  $(\text{C}_{25}\text{H}_{20}\text{NOS})^+ [\text{M} + \text{H}]^+$  382.1260, found 382.1262;  $[\alpha]_{\text{D}}^{20} +27.6$  ( $c$  0.5,  $\text{CHCl}_3$ ); HPLC (Daicel CHIRALPAK OD-H, Hexane : Isopropanol = 95 : 5, Flow rate = 0.5 mL/min,  $\lambda = 254$  nm):  $t_{\text{R}} = 11.6$  min (minor enantiomer),  $t_{\text{R}} = 12.6$  min (major enantiomer).

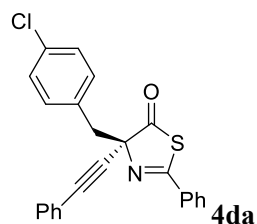

(*R*)-4-(4-chlorobenzyl)-2-phenyl-4-(phenylethynyl)thiazol-5(4H)-one (**4da**): following general procedure, **1d** (30.1 mg, 0.1 mmol, 1.0 eq.), **3a** (41.8 mg, 0.12 mmol, 1.2 eq.), catalyst **J** (4.2 mg, 0.005 mmol), was added in toluene (1.0 mL) and then  $\text{K}_3\text{PO}_4 \cdot 3\text{H}_2\text{O}$  (13.4 mg, 0.05 mmol) was added; flash chromatography with PE : EA = 100 : 1, light yellow solid, 28.5 mg, 71% yield, 69% ee;  $^1\text{H NMR}$  (400 MHz,  $\text{CDCl}_3$ )  $\delta$  7.84 – 7.76 (m, 2H), 7.57 – 7.51 (m, 1H), 7.50 – 7.43 (m, 4H), 7.31 (ddd,  $J = 9.1, 6.2, 4.5$  Hz, 3H), 7.20 (s, 4H), 3.60 (d,  $J = 13.4$  Hz, 1H), 3.44 (d,  $J = 13.4$  Hz, 1H);  $^{13}\text{C NMR}$  (100 MHz,  $\text{CDCl}_3$ )  $\delta$  205.03, 165.36, 133.53, 132.96, 132.70, 132.21, 132.12, 129.09, 129.02, 128.38, 128.36, 128.30, 121.75, 87.03, 84.71, 83.53, 45.12; HRMS (ESI) calcd for  $(\text{C}_{24}\text{H}_{17}\text{ClNOS})^+ [\text{M} + \text{H}]^+$  402.0714, found 402.0715;  $[\alpha]_{\text{D}}^{20} +24.2$  ( $c$  0.5,  $\text{CHCl}_3$ ); HPLC (Daicel CHIRALPAK OD-H, Hexane : Isopropanol = 95 : 5, Flow rate = 0.5 mL/min,  $\lambda = 254$  nm):  $t_{\text{R}} = 11.27$  min (minor enantiomer),  $t_{\text{R}} = 12.11$  min (major enantiomer).

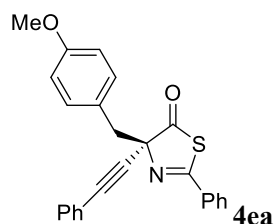

(*R*)-4-(4-methoxybenzyl)-2-phenyl-4-(phenylethynyl)thiazol-5(4H)-one (**4ea**): following general procedure, **1e** (29.7 mg, 0.1 mmol, 1.0 eq.), **3a** (41.8 mg, 0.12 mmol, 1.2 eq.), catalyst **J** (4.2 mg, 0.005 mmol), was added in toluene (1.0 mL) and then  $\text{K}_3\text{PO}_4 \cdot 3\text{H}_2\text{O}$  (13.4 mg, 0.05 mmol) was added; flash chromatography with PE : EA = 100 : 1, light yellow solid, 24.6 mg, 62% yield, 75% ee;  $^1\text{H NMR}$  (400 MHz,  $\text{CDCl}_3$ )  $\delta$  7.83 – 7.76 (m, 2H), 7.52 (d,  $J = 7.3$  Hz, 1H), 7.50 – 7.42 (m, 4H), 7.35 – 7.26 (m, 3H), 7.17 (d,  $J = 8.6$  Hz, 2H), 6.74 (d,  $J = 8.6$  Hz, 2H), 3.73 (s, 3H), 3.61 (d,  $J = 13.5$  Hz, 1H), 3.46 (d,  $J = 13.5$  Hz, 1H);  $^{13}\text{C NMR}$  (100 MHz,  $\text{CDCl}_3$ )  $\delta$  205.47, 165.14, 158.94, 133.15, 132.49, 132.14, 131.95, 128.94, 128.37, 128.31, 125.59, 121.95, 113.50, 86.70, 85.11, 83.97, 55.23, 45.33; HRMS (ESI) calcd for  $(\text{C}_{25}\text{H}_{20}\text{NO}_2\text{S})^+ [\text{M} + \text{H}]^+$  398.1209, found 398.1211;  $[\alpha]_{\text{D}}^{20} +28.8$  ( $c$  0.5,  $\text{CHCl}_3$ ); HPLC (Daicel CHIRALPAK OD-H, Hexane : Isopropanol = 95 : 5, Flow rate = 0.5 mL/min,  $\lambda = 254$  nm):  $t_{\text{R}} = 12.46$  min (minor enantiomer),  $t_{\text{R}} = 13.24$  min (major enantiomer).



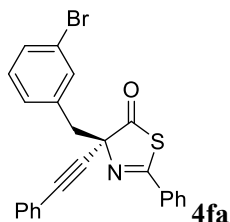

(*R*)-4-(3-bromobenzyl)-2-phenyl-4-(phenylethynyl)thiazol-5(4H)-one (**4fa**): following general procedure: **1f** (34.5 mg, 0.1 mmol, 1.0 eq.), **3a** (41.8 mg, 0.12 mmol, 1.2 eq.), catalyst **J** (4.2 mg, 0.005 mmol), was added in toluene (1.0 mL) and then  $K_3PO_4 \cdot 3H_2O$  (13.4 mg, 0.05 mmol) was added; flash chromatography with PE:EA = 100:1, light yellow solid, 27.1 mg, 61% yield, 81% ee;  $^1H$  NMR (400 MHz,  $CDCl_3$ )  $\delta$  7.83 – 7.78 (m, 2H), 7.58 – 7.51 (m, 1H), 7.51 – 7.43 (m, 5H), 7.37 – 7.26 (m, 4H), 7.20 (d,  $J = 7.6$  Hz, 1H), 7.10 (t,  $J = 7.8$  Hz, 1H), 3.58 (d,  $J = 13.3$  Hz, 1H), 3.40 (d,  $J = 13.3$  Hz, 1H);  $^{13}C$  NMR (100 MHz,  $CDCl_3$ )  $\delta$  204.89, 165.42, 136.01, 134.03, 132.96, 132.69, 132.17, 130.64, 129.64, 129.48, 129.10, 129.01, 128.41, 128.34, 122.01, 121.71, 87.27, 84.62, 83.35, 45.37. HRMS (ESI) calcd for  $(C_{24}H_{17}BrNOS)^+ [M + H]^+$  446.0209, found 446.0215;  $[\alpha]_D^{20} +24.8$  ( $c$  0.5,  $CHCl_3$ ); HPLC (Daicel CHIRALPAK OD-H, Hexane : Isopropanol = 95 : 5, Flow rate = 0.5 mL/min,  $\lambda = 254$  nm):  $t_R = 13.88$  min (minor enantiomer),  $t_R = 14.78$  min (major enantiomer).

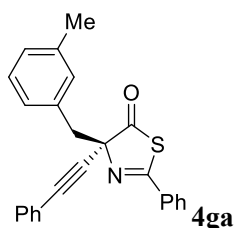

(*R*)-4-(3-methylbenzyl)-2-phenyl-4-(phenylethynyl)thiazol-5(4H)-one (**4ga**): following general procedure: **1g** (28.1 mg, 0.1 mmol, 1.0 eq.), **3a** (41.8 mg, 0.12 mmol, 1.2 eq.), catalyst **J** (4.2 mg, 0.005 mmol), was added in toluene (1.0 mL) and then  $K_3PO_4 \cdot 3H_2O$  (13.4 mg, 0.05 mmol) was added; flash chromatography with PE:EA = 100:1, light yellow solid, 30.1 mg, 79% yield, 79% ee;  $^1H$  NMR (400 MHz,  $CDCl_3$ )  $\delta$  7.80 (dd,  $J = 5.3, 3.3$  Hz, 2H), 7.58 – 7.51 (m, 1H), 7.51 – 7.43 (m, 4H), 7.38 – 7.27 (m, 3H), 7.16 – 7.05 (m, 3H), 7.02 (d,  $J = 7.2$  Hz, 1H), 3.64 (d,  $J = 13.2$  Hz, 1H), 3.47 (d,  $J = 13.2$  Hz, 1H), 2.24 (s, 3H);  $^{13}C$  NMR (100 MHz,  $CDCl_3$ )  $\delta$  205.34, 165.09, 137.51, 133.41, 133.15, 132.48, 132.14, 131.83, 128.96, 128.91, 128.34, 128.31, 128.21, 127.96, 127.91, 121.95, 86.77, 84.91, 83.94, 46.11, 21.37; HRMS (ESI) calcd for  $(C_{25}H_{20}NOS)^+ [M + H]^+$  382.1260, found 382.1264;  $[\alpha]_D^{20} +23.2$  ( $c$  0.5,  $CHCl_3$ ); HPLC (Daicel CHIRALPAK OD-H, Hexane : Isopropanol = 97 : 3, Flow rate = 0.3 mL/min,  $\lambda = 254$  nm):  $t_R = 18.34$  min (minor enantiomer),  $t_R = 19.18$  min (major enantiomer).

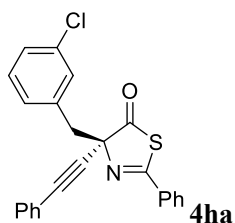

(*R*)-4-(3-chlorobenzyl)-2-phenyl-4-(phenylethynyl)thiazol-5(4H)-one (**4ha**): following general

procedure: **1h** (30.1 mg, 0.1 mmol, 1.0 eq.), **3a** (41.8 mg, 0.12 mmol, 1.2 eq.), catalyst **J** (4.2 mg, 0.005 mmol), was added in toluene (1.0 mL) and then  $K_3PO_4 \cdot 3H_2O$  (13.4 mg, 0.05 mmol) was added; flash chromatography with PE:EA = 100:1, light yellow solid, 29.67 mg, 74% yield, 77% ee;  $^1H$  NMR (400 MHz,  $CDCl_3$ )  $\delta$  7.83 – 7.74 (m, 2H), 7.53 (d,  $J = 7.3$  Hz, 1H), 7.46 (ddd,  $J = 6.9, 6.3, 4.9$  Hz, 4H), 7.35 – 7.26 (m, 4H), 7.22 – 7.13 (m, 3H), 3.59 (d,  $J = 13.3$  Hz, 1H), 3.41 (d,  $J = 13.3$  Hz, 1H);  $^{13}C$  NMR (100 MHz,  $CDCl_3$ )  $\delta$  204.91, 165.39, 135.72, 133.81, 132.97, 132.68, 132.15, 131.08, 129.33, 129.09, 129.05, 129.00, 128.39, 128.34, 127.73, 121.72, 87.23, 84.62, 83.37, 45.39; HRMS (ESI) calcd for  $(C_{24}H_{17}ClNOS)^+ [M + H]^+$  402.0714, found 402.0717;  $[\alpha]_D^{20} +15.2$  ( $c$  0.5,  $CHCl_3$ ); HPLC (Daicel CHIRALPAK OD-H, Hexane : Isopropanol = 97 : 3, Flow rate = 0.3 mL/min,  $\lambda = 254$  nm):  $t_R = 21.40$  min (minor enantiomer),  $t_R = 22.57$  min (major enantiomer).

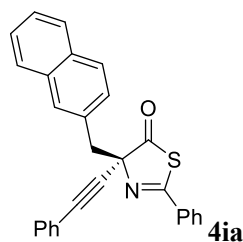

(*R*)-4-(naphthalen-2-yl)-2-phenyl-4-(phenylethynyl)thiazol-5(4H)-one (**4ia**): following general procedure: **1i** (31.7 mg, 0.1 mmol, 1.0 eq.), **3a** (41.8 mg, 0.12 mmol, 1.2 eq.), catalyst **J** (4.2 mg, 0.005 mmol), was added in toluene (1.0 mL) and then  $K_3PO_4 \cdot 3H_2O$  (13.4 mg, 0.05 mmol) was added; flash chromatography with PE:EA = 100:1, light yellow solid, 27.11 mg, 65% yield, 67% ee;  $^1H$  NMR (400 MHz,  $CDCl_3$ )  $\delta$  7.81 – 7.72 (m, 5H), 7.70 (dd,  $J = 8.4, 4.8$  Hz, 1H), 7.54 – 7.38 (m, 8H), 7.35 – 7.23 (m, 3H), 3.83 (dd,  $J = 13.3, 4.9$  Hz, 1H), 3.67 (dd,  $J = 13.3, 5.0$  Hz, 1H);  $^{13}C$  NMR (100 MHz,  $CDCl_3$ )  $\delta$  205.30, 165.27, 133.21, 133.08, 132.68, 132.53, 132.16, 131.26, 129.95, 129.02, 128.93, 128.90, 128.37, 128.34, 127.94, 127.67, 127.54, 126.02, 125.93, 121.90, 86.94, 85.10, 83.91, 46.13; HRMS (ESI) calcd for  $(C_{28}H_{20}NOS)^+ [M + H]^+$  418.1260, found 418.1265;  $[\alpha]_D^{20} +35.40$  ( $c$  0.5,  $CHCl_3$ ); HPLC (Daicel CHIRALPAK OD-H, Hexane : Isopropanol = 97 : 3, Flow rate = 0.3 mL/min,  $\lambda = 254$  nm):  $t_R = 29.16$  min (minor enantiomer),  $t_R = 31.01$  min (major enantiomer).

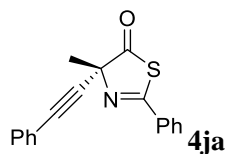

(*R*)-4-methyl-2-phenyl-4-(phenylethynyl)thiazol-5(4H)-one (**4ja**): following general procedure: **1j** (19.1 mg, 0.1 mmol, 1.0 eq.), **3a** (41.8 mg, 0.12 mmol, 1.2 eq.), catalyst **J** (4.2 mg, 0.005 mmol), was added in toluene (1.0 mL) and then  $K_3PO_4 \cdot 3H_2O$  (13.4 mg, 0.05 mmol) was added; flash chromatography with PE:EA = 100:1, light yellow solid, 18.92 mg, 65% yield, 49% ee;  $^1H$  NMR (400 MHz,  $CDCl_3$ )  $\delta$  7.92 – 7.84 (m, 2H), 7.54 (dd,  $J = 5.0, 3.7$  Hz, 1H), 7.51 – 7.42 (m, 4H), 7.35 – 7.25 (m, 3H), 1.87 (s, 3H);  $^{13}C$  NMR (100 MHz,  $CDCl_3$ )  $\delta$  205.33, 164.03, 133.25, 132.60, 132.13, 128.99, 128.93, 128.47, 128.30, 121.92, 85.66, 84.53, 80.87, 26.16; HRMS (ESI) calcd for  $(C_{18}H_{14}NOS)^+ [M + H]^+$  292.0791, found 292.0794;  $[\alpha]_D^{20} -6.4$  ( $c$  0.5,  $CHCl_3$ ); HPLC (Daicel CHIRALPAK OD-H, Hexane : Isopropanol = 95 : 5, Flow rate = 0.5 mL/min,  $\lambda = 254$  nm):  $t_R = 9.90$  min (major enantiomer),  $t_R = 10.97$  min (minor enantiomer).

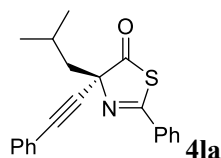

(*R*)-4-isobutyl-2-phenyl-4-(phenylethynyl)thiazol-5(4H)-one (**41a**): following general procedure:**11** (23.3 mg, 0.1 mmol, 1.0 eq.), **3a** (41.8 mg, 0.12 mmol, 1.2 eq.), catalyst **J** (4.2 mg, 0.005 mmol), was added in toluene (1.0 mL) and then  $K_3PO_4 \cdot 3H_2O$  (13.4 mg, 0.05 mmol) was added; flash chromatography with PE:EA = 100:1, light yellow solid, 18.32 mg, 55% yield, 71% ee;  $^1H$  NMR (400 MHz,  $CDCl_3$ )  $\delta$  7.88 (dd,  $J$  = 5.3, 3.4 Hz, 2H), 7.59 – 7.41 (m, 5H), 7.34 – 7.26 (m, 3H), 2.28 (dd,  $J$  = 13.7, 5.3 Hz, 1H), 2.13 (dd,  $J$  = 12.7, 6.1 Hz, 1H), 1.93 (dd,  $J$  = 13.7, 7.0 Hz, 1H), 1.05 (dd,  $J$  = 8.8, 6.7 Hz, 6H);  $^{13}C$  NMR (100 MHz,  $CDCl_3$ )  $\delta$  205.82, 163.68, 133.42, 132.48, 132.08, 128.98, 128.86, 128.46, 128.29, 126.31, 122.09, 86.10, 84.64, 84.32, 48.26, 25.66, 24.15, 23.97; HRMS (ESI) calcd for  $(C_{21}H_{20}NOS)^+ [M + H]^+$  334.1260, found 334.1265;  $[\alpha]_D^{20}$  +23.7 ( $c$  0.3,  $CHCl_3$ ); HPLC (Daicel CHIRALPAK OJ-H, Hexane : Isopropanol = 95 : 5, Flow rate = 0.5 mL/min,  $\lambda$  = 254 nm):  $t_R$  = 10.70 min (major enantiomer),  $t_R$  = 11.71 min (minor enantiomer).

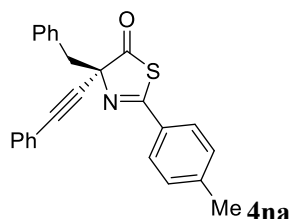

(*R*)-4-benzyl-4-(phenylethynyl)-2-(p-tolyl)thiazol-5(4H)-one (**4na**): following general procedure: **1n** (28.1 mg, 0.1 mmol, 1.0 eq.), **3a** (41.8 mg, 0.12 mmol, 1.2 eq.), catalyst **J** (4.2 mg, 0.005 mmol), was added in toluene (1.0 mL) and then  $K_3PO_4 \cdot 3H_2O$  (13.4 mg, 0.05 mmol) was added; flash chromatography with PE:EA = 100:1, light yellow solid, 28.58 mg, 75% yield, 79% ee;  $^1H$  NMR (400 MHz,  $CDCl_3$ )  $\delta$  7.67 (d,  $J$  = 8.2 Hz, 2H), 7.46 (dd,  $J$  = 7.6, 1.8 Hz, 2H), 7.35 – 7.28 (m, 3H), 7.27 – 7.24 (m, 4H), 7.23 – 7.16 (m, 3H), 3.64 (d,  $J$  = 13.3 Hz, 1H), 3.49 (d,  $J$  = 13.3 Hz, 1H), 2.41 (s, 3H);  $^{13}C$  NMR (100 MHz,  $CDCl_3$ )  $\delta$  205.55, 164.94, 143.24, 133.65, 132.14, 130.94, 130.47, 129.62, 128.95, 128.33, 128.31, 128.07, 127.45, 121.97, 86.71, 84.83, 84.04, 46.09, 21.72. HRMS (ESI) calcd for  $(C_{25}H_{20}NOS)^+ [M + H]^+$  382.1260, found 382.1262;  $[\alpha]_D^{20}$  +30.0 ( $c$  0.5,  $CHCl_3$ ); HPLC (Daicel CHIRALPAK OD-H, Hexane : Isopropanol = 95 : 5, Flow rate = 0.5 mL/min,  $\lambda$  = 254 nm):  $t_R$  = 10.68 min (minor enantiomer),  $t_R$  = 11.52 min (major enantiomer).

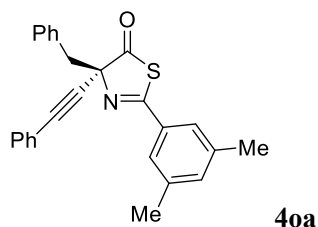

(*R*)-4-benzyl-2-(3,5-dimethylphenyl)-4-(phenylethynyl)thiazol-5(4H)-one (**4oa**): following general procedure: **1o** (29.53 mg, 0.1 mmol, 1.0 eq.), **3a** (41.8 mg, 0.12 mmol, 1.2 eq.), catalyst **J** (4.2 mg, 0.005 mmol), was added in toluene (1.0 mL) and then  $K_3PO_4 \cdot 3H_2O$  (13.4 mg, 0.05 mmol) was added; flash chromatography with PE:EA = 100:1, light yellow solid, 35.16 mg, 89% yield, 75%

ee;  $^1\text{H NMR}$  (400 MHz,  $\text{CDCl}_3$ )  $\delta$  7.49 – 7.44 (m, 2H), 7.40 (s, 2H), 7.34 – 7.18 (m, 8H), 7.16 (s, 1H), 3.66 (d,  $J = 13.3$  Hz, 1H), 3.50 (d,  $J = 13.3$  Hz, 1H), 2.36 (s, 6H).  $^{13}\text{C NMR}$  (100 MHz,  $\text{CDCl}_3$ )  $\delta$  205.51, 165.53, 138.69, 134.29, 133.63, 133.04, 132.15, 130.94, 128.95, 128.31, 128.11, 127.48, 126.11, 121.97, 86.75, 84.82, 83.98, 46.05, 21.22; HRMS (ESI) calcd for  $(\text{C}_{26}\text{H}_{22}\text{NOS})^+ [\text{M} + \text{H}]^+$  396.1417, found 396.1422;  $[\alpha]_{\text{D}}^{20} +6.4$  ( $c$  0.5,  $\text{CHCl}_3$ ); HPLC (Daicel CHIRALPAK OD-H, Hexane : Isopropanol = 97 : 3, Flow rate = 0.5 mL/min,  $\lambda = 254$  nm):  $t_{\text{R}} = 9.93$  min (minor enantiomer),  $t_{\text{R}} = 11.00$  min (major enantiomer).

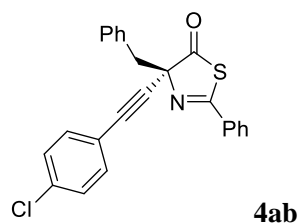

(*R*)-4-benzyl-4-((4-chlorophenyl)ethynyl)-2-phenylthiazol-5(4H)-one (**4ab**): following general procedure: **1a** (26.7 mg, 0.1 mmol, 1.0 eq.), **3b** (45.8 mg, 0.12 mmol, 1.2 eq.), catalyst **J** (4.2 mg, 0.005 mmol), was added in toluene (1.0 mL) and then  $\text{K}_3\text{PO}_4 \cdot 3\text{H}_2\text{O}$  (13.4 mg, 0.05 mmol) was added; flash chromatography with PE:EA = 100:1, light yellow solid, 28.47 mg, 71% yield, 79% ee;  $^1\text{H NMR}$  (400 MHz,  $\text{CDCl}_3$ )  $\delta$  7.78 (d,  $J = 7.3$  Hz, 2H), 7.52 (d,  $J = 7.3$  Hz, 1H), 7.46 (t,  $J = 7.4$  Hz, 2H), 7.38 (dd,  $J = 8.6, 1.7$  Hz, 2H), 7.30 – 7.23 (m, 4H), 7.23 – 7.16 (m, 3H), 3.64 (d,  $J = 13.3$  Hz, 1H), 3.48 (d,  $J = 13.3$  Hz, 1H);  $^{13}\text{C NMR}$  (100 MHz,  $\text{CDCl}_3$ )  $\delta$  205.16, 165.36, 135.12, 133.45, 133.37, 133.03, 132.60, 130.91, 128.97, 128.72, 128.36, 128.12, 127.56, 120.39, 85.68, 84.86, 46.00; HRMS (ESI) calcd for  $(\text{C}_{24}\text{H}_{17}\text{ClNOS})^+ [\text{M} + \text{H}]^+$  402.0714, found 402.0716;  $[\alpha]_{\text{D}}^{20} +46.6$  ( $c$  0.5,  $\text{CHCl}_3$ ); HPLC (Daicel CHIRALPAK OD-H, Hexane : Isopropanol = 95 : 5, Flow rate = 0.5 mL/min,  $\lambda = 254$  nm):  $t_{\text{R}} = 10.85$  min (minor enantiomer),  $t_{\text{R}} = 13.35$  min (major enantiomer).

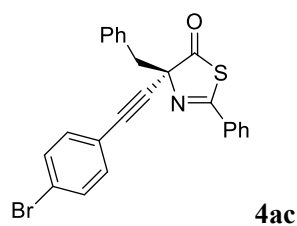

(*R*)-4-benzyl-4-((4-bromophenyl)ethynyl)-2-phenylthiazol-5(4H)-one (**4ac**): following general procedure: **1a** (26.7 mg, 0.1 mmol, 1.0 eq.), **3c** (51.1 mg, 0.12 mmol, 1.2 eq.), catalyst **J** (4.2 mg, 0.005 mmol), was added in toluene (1.0 mL) and then  $\text{K}_3\text{PO}_4 \cdot 3\text{H}_2\text{O}$  (13.4 mg, 0.05 mmol) was added; flash chromatography with PE:EA = 100:1, light yellow solid, 22.70 mg, 51% yield, 73% ee;  $^1\text{H NMR}$  (400 MHz,  $\text{CDCl}_3$ )  $\delta$  7.78 (d,  $J = 7.7$  Hz, 2H), 7.53 (t,  $J = 7.2$  Hz, 1H), 7.45 (dd,  $J = 14.1, 8.0$  Hz, 4H), 7.31 (d,  $J = 8.4$  Hz, 2H), 7.27 – 7.17 (m, 5H), 3.63 (d,  $J = 13.3$  Hz, 1H), 3.48 (d,  $J = 13.3$  Hz, 1H);  $^{13}\text{C NMR}$  (100 MHz,  $\text{CDCl}_3$ )  $\delta$  205.14, 165.38, 133.55, 133.43, 133.01, 132.61, 131.64, 130.90, 128.97, 128.36, 128.12, 127.56, 123.40, 120.85, 85.73, 85.01, 84.86, 45.98; HRMS (ESI) calcd for  $(\text{C}_{24}\text{H}_{17}\text{BrNOS})^+ [\text{M} + \text{H}]^+$  446.0209, found 446.2010;  $[\alpha]_{\text{D}}^{20} +10.8$  ( $c$  0.5,  $\text{CHCl}_3$ ); HPLC (Daicel CHIRALPAK OD-H, Hexane : Isopropanol = 95 : 5, Flow rate = 0.5 mL/min,  $\lambda = 254$  nm):  $t_{\text{R}} = 11.12$  min (minor enantiomer),  $t_{\text{R}} = 12.97$  min (major enantiomer).

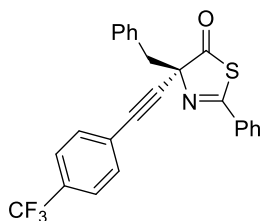

**4ad**

(*R*)-4-benzyl-2-phenyl-4-((4-(trifluoromethyl)phenyl)ethynyl)thiazol-5(4H)-one (**4ad**): following general procedure: **1a** (26.7 mg, 0.1 mmol, 1.0 eq.), **3d** (49.9 mg, 0.12 mmol, 1.2 eq.), catalyst **J** (4.2 mg, 0.005 mmol), was added in toluene (1.0 mL) and then  $K_3PO_4 \cdot 3H_2O$  (13.4 mg, 0.05 mmol) was added; flash chromatography with PE:EA = 100:1, light yellow solid, 30.02 mg, 69% yield, 73% ee;  $^1H$  NMR (400 MHz,  $CDCl_3$ )  $\delta$  7.79 (dd,  $J = 5.2, 3.4$  Hz, 2H), 7.56 (s, 4H), 7.55 – 7.51 (m, 1H), 7.47 (t,  $J = 7.4$  Hz, 2H), 7.27 – 7.19 (m, 5H), 3.65 (d,  $J = 13.3$  Hz, 1H), 3.50 (d,  $J = 13.3$  Hz, 1H);  $^{13}C$  NMR (100 MHz,  $CDCl_3$ )  $\delta$  204.97, 165.60, 133.34, 132.97, 132.67, 132.40, 130.91, 130.72 (q,  $J_{C-F} = 32.6$  Hz), 128.99, 128.37, 128.15, 127.63, 125.31, 125.27, 125.23, 124.83 (q,  $J_{C-F} = 155$  Hz), 86.30, 85.33, 84.79, 45.99; HRMS (ESI) calcd for  $(C_{25}H_{17}F_3NOS)^+ [M + H]^+$  436.0977, found 436.0983;  $[\alpha]_D^{20} +22.00$  ( $c$  0.5,  $CHCl_3$ ); HPLC (Daicel CHIRALPAK OJ-H, Hexane : Isopropanol = 97:3, Flow rate = 0.3 mL/min,  $\lambda = 254$  nm):  $t_R = 32.36$  min (minor enantiomer),  $t_R = 39.36$  min (major enantiomer).

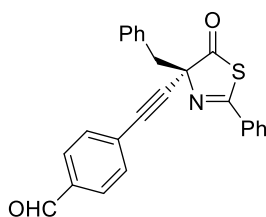

**4ae**

(*R*)-4-((4-benzyl-5-oxo-2-phenyl-4,5-dihydrothiazol-4-yl)ethynyl)benzaldehyde (**4ae**): following general procedure: **1a** (26.7 mg, 0.1 mmol, 1.0 eq.), **3e** (45.1 mg, 0.12 mmol, 1.2 eq.), catalyst **J** (4.2 mg, 0.005 mmol), was added in toluene (1.0 mL) and then  $K_3PO_4 \cdot 3H_2O$  (13.4 mg, 0.05 mmol) was added; flash chromatography with PE:EA = 100:1, light yellow solid, 28.05 mg, 71% yield, 79% ee;  $^1H$  NMR (400 MHz,  $CDCl_3$ )  $\delta$  9.99 (s, 1H), 7.80 (dd,  $J = 12.3, 7.9$  Hz, 4H), 7.61 (d,  $J = 8.2$  Hz, 2H), 7.54 (dd,  $J = 10.5, 4.1$  Hz, 1H), 7.47 (t,  $J = 7.6$  Hz, 2H), 7.25 (d,  $J = 3.2$  Hz, 1H), 7.22 (dd,  $J = 8.0, 3.4$  Hz, 4H), 3.65 (d,  $J = 13.3$  Hz, 1H), 3.50 (d,  $J = 13.3$  Hz, 1H);  $^{13}C$  NMR (100 MHz,  $CDCl_3$ )  $\delta$  204.90, 191.48, 165.66, 136.02, 133.29, 132.96, 132.69, 130.90, 129.51, 129.00, 128.37, 128.16, 128.09, 127.64, 87.75, 85.73, 84.84, 45.97; HRMS (ESI) calcd for  $(C_{25}H_{18}NO_2S)^+ [M + H]^+$  396.1053, found 396.1055;  $[\alpha]_D^{20} +11.80$  ( $c$  0.5,  $CHCl_3$ ); HPLC (Daicel CHIRALPAK OJ-H, Hexane : Isopropanol = 95 : 5, Flow rate = 1.0 mL/min,  $\lambda = 254$  nm):  $t_R = 16.88$  min (major enantiomer),  $t_R = 20.04$  min (minor enantiomer).

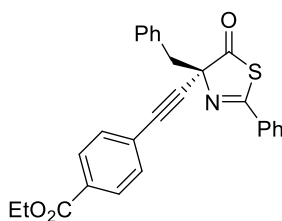

**4af**

(*R*)-4-((4-benzyl-5-oxo-2-phenyl-4,5-dihydrothiazol-4-yl)ethynyl)phenyl propionate (**4af**): following general procedure: **1a** (26.7 mg, 0.1 mmol, 1.0 eq.), **3f** (50.4 mg, 0.12 mmol, 1.2 eq.), catalyst **J** (4.2 mg, 0.005 mmol), was added in toluene (1.0 mL) and then K<sub>3</sub>PO<sub>4</sub> · 3H<sub>2</sub>O (13.4 mg, 0.05 mmol) was added; flash chromatography with PE:EA = 100:1, light yellow solid, 31.61 mg, 72% yield, 79% ee; <sup>1</sup>H NMR (400 MHz, CDCl<sub>3</sub>) δ 7.98 (d, *J* = 8.2 Hz, 2H), 7.79 (d, *J* = 7.8 Hz, 2H), 7.52 (dd, *J* = 7.8, 3.2 Hz, 3H), 7.46 (t, *J* = 7.6 Hz, 2H), 7.29 – 7.17 (m, 5H), 4.36 (q, *J* = 7.1 Hz, 2H), 3.66 (d, *J* = 13.3 Hz, 1H), 3.50 (d, *J* = 13.3 Hz, 1H), 1.38 (t, *J* = 7.1 Hz, 3H); <sup>13</sup>C NMR (100 MHz, CDCl<sub>3</sub>) δ 205.02, 166.02, 165.50, 133.38, 133.00, 132.63, 132.04, 130.92, 130.60, 129.44, 128.98, 128.37, 128.14, 127.59, 126.41, 86.63, 85.98, 84.86, 61.30, 45.99, 14.40; HRMS (ESI) calcd for (C<sub>27</sub>H<sub>22</sub>NO<sub>3</sub>S)<sup>+</sup>[M + H]<sup>+</sup> 440.1315, found 440.1315; [α]<sub>D</sub><sup>20</sup> +21.40 (*c* 0.5, CHCl<sub>3</sub>); HPLC (Daicel CHIRALPAK OD-H, Hexane : Isopropanol = 95 : 5, Flow rate = 0.5 mL/min, λ = 254 nm): t<sub>R</sub> = 12.46 min (minor enantiomer), t<sub>R</sub> = 13.72 min (major enantiomer).

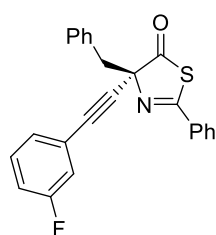

**4ag**

(*R*)-4-benzyl-4-((3-fluorophenyl)ethynyl)-2-phenylthiazol-5(4H)-one (**4ag**): following general procedure: **1a** (26.7 mg, 0.1 mmol, 1.0 eq.), **3g** (45.84 mg, 0.12 mmol, 1.2 eq.), catalyst **J** (4.2 mg, 0.005 mmol), was added in toluene (1.0 mL) and then K<sub>3</sub>PO<sub>4</sub> · 3H<sub>2</sub>O (13.4 mg, 0.05 mmol) was added; flash chromatography with PE:EA = 100:1, light yellow solid, 29.26 mg, 76% yield, 79% ee; <sup>1</sup>H NMR (400 MHz, CDCl<sub>3</sub>) δ 7.78 (dd, *J* = 5.2, 3.5 Hz, 2H), 7.57 – 7.50 (m, 1H), 7.49 – 7.42 (m, 2H), 7.27 – 7.19 (m, 7H), 7.16 (d, *J* = 8.5 Hz, 1H), 7.10 – 6.99 (m, 1H), 3.64 (d, *J* = 13.3 Hz, 1H), 3.49 (d, *J* = 13.3 Hz, 1H); <sup>13</sup>C NMR (100 MHz, CDCl<sub>3</sub>) δ 205.09, 165.42, 162.29 (q, *J*<sub>C-F</sub> = 245 Hz), 133.42, 133.02, 132.61, 130.91, 129.96 (q, *J*<sub>C-F</sub> = 8 Hz), 128.97, 128.36, 128.13, 128.06, 128.03, 127.58, 123.71 (q, *J*<sub>C-F</sub> = 10 Hz), 118.95 (q, *J*<sub>C-F</sub> = 23 Hz), 116.43 (q, *J*<sub>C-F</sub> = 21 Hz), 85.49, 84.80, 45.98; HRMS (ESI) calcd for (C<sub>24</sub>H<sub>17</sub>FNOS)<sup>+</sup> [M + H]<sup>+</sup> 386.1009, found 386.1015; [α]<sub>D</sub><sup>20</sup> +35.2 (*c* 0.5, CHCl<sub>3</sub>); HPLC (Daicel CHIRALPAK OD-H, Hexane : Isopropanol = 95 : 5, Flow rate = 0.5 mL/min, λ = 254 nm): t<sub>R</sub> = 10.67 min (minor enantiomer), t<sub>R</sub> = 11.95 min (major enantiomer).

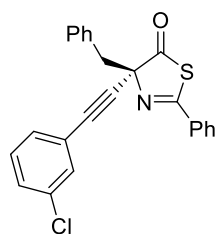

**4ah**

(*R*)-4-benzyl-4-((3-chlorophenyl)ethynyl)-2-phenylthiazol-5(4H)-one (**4ah**): following general procedure: **1a** (26.7 mg, 0.1 mmol, 1.0 eq.), **3h** (45.84 mg, 0.12 mmol, 1.2 eq.), catalyst **J** (4.2 mg, 0.005 mmol), was added in toluene (1.0 mL) and then K<sub>3</sub>PO<sub>4</sub> · 3H<sub>2</sub>O (13.4 mg, 0.05 mmol) was added; flash chromatography with PE:EA = 100:1, light yellow solid, 28.07 mg, 70% yield, 73% ee; <sup>1</sup>H NMR (400 MHz, CDCl<sub>3</sub>) δ 7.78 (d, *J* = 7.3 Hz, 2H), 7.53 (d, *J* = 7.2 Hz, 1H), 7.46 (dd, *J* = 8.4, 6.2 Hz, 3H), 7.36 – 7.28 (m, 2H), 7.28 – 7.19 (m, 6H), 3.64 (d, *J* = 13.3 Hz, 1H), 3.48 (d, *J* = 13.3 Hz,

1H); <sup>13</sup>C NMR (100 MHz, CDCl<sub>3</sub>) δ 205.06, 165.43, 134.19, 133.41, 133.01, 132.61, 132.01, 130.91, 130.23, 129.59, 129.32, 128.97, 128.36, 128.13, 127.58, 123.59, 85.32, 85.12, 84.80, 45.97; HRMS (ESI) calcd for (C<sub>24</sub>H<sub>17</sub>ClNOS)<sup>+</sup> [M + H]<sup>+</sup> 402.0714, found 402.0720; [α]<sub>D</sub><sup>20</sup> +3.20 (c 0.25, CHCl<sub>3</sub>); HPLC (Daicel CHIRALPAK oD-H, Hexane : Isopropanol = 95 : 5, Flow rate = 0.5 mL/min, λ = 254 nm): t<sub>R</sub> = 10.87 min (minor enantiomer), t<sub>R</sub> = 11.96 min (major enantiomer).

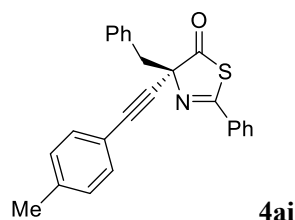

(*R*)-4-benzyl-2-phenyl-4-(*p*-tolylethynyl)thiazol-5(4H)-one (**4ai**): following general procedure: **1a** (26.7 mg, 0.1 mmol, 1.0 eq.), **3i** (43.4 mg, 0.12 mmol, 1.2 eq.), catalyst **J** (4.2 mg, 0.005 mmol), was added in toluene (1.0 mL) and then K<sub>3</sub>PO<sub>4</sub>·3H<sub>2</sub>O (13.4 mg, 0.05 mmol) was added; flash chromatography with PE:EA = 100:1, light yellow solid, 28.58 mg, 75% yield, 83% ee; <sup>1</sup>H NMR (400 MHz, CDCl<sub>3</sub>) δ 7.78 (d, *J* = 7.5 Hz, 2H), 7.52 (dd, *J* = 8.3, 6.1 Hz, 1H), 7.45 (t, *J* = 7.6 Hz, 2H), 7.35 (d, *J* = 8.0 Hz, 2H), 7.28 – 7.24 (m, 2H), 7.23 – 7.17 (m, 3H), 7.10 (d, *J* = 8.0 Hz, 2H), 3.65 (d, *J* = 13.3 Hz, 1H), 3.49 (d, *J* = 13.3 Hz, 1H), 2.33(s, 3H); <sup>13</sup>C NMR (100 MHz, CDCl<sub>3</sub>) δ 205.42, 165.03, 139.17, 133.65, 133.13, 132.48, 132.03, 130.93, 129.08, 128.92, 128.35, 128.08, 127.46, 118.83, 87.01, 84.96, 83.15, 46.07, 21.64; HRMS (ESI) calcd for (C<sub>25</sub>H<sub>20</sub>NOS)<sup>+</sup> [M + H]<sup>+</sup> 382.1260, found 382.1263; [α]<sub>D</sub><sup>20</sup> -2.4 (c 0.5, CHCl<sub>3</sub>); HPLC (Daicel CHIRALPAK OD-H, Hexane : Isopropanol = 95 : 5, Flow rate = 0.5 mL/min, λ = 254 nm): t<sub>R</sub> = 10.44 min (minor enantiomer), t<sub>R</sub> = 12.49 min (major enantiomer).

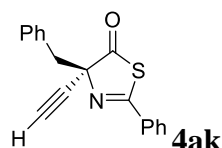

(*R*)-4-benzyl-4-ethynyl-2-phenylthiazol-5(4H)-one (**4ak**): following general procedure: **1a** (26.7 mg, 0.1 mmol, 1.0 eq.), **3k** (43.4 mg, 0.12 mmol, 1.2 eq.), catalyst **J** (4.2 mg, 0.005 mmol), was added in toluene (1.0 mL) and then K<sub>3</sub>PO<sub>4</sub>·3H<sub>2</sub>O (13.4 mg, 0.05 mmol) was added; flash chromatography with PE:EA = 100:1, white solid, 23.28 mg, 80% yield, 31% ee; <sup>1</sup>H NMR (400 MHz, CDCl<sub>3</sub>) δ 7.75 (d, *J* = 7.4 Hz, 2H), 7.52 (dd, *J* = 10.5, 4.2 Hz, 1H), 7.44 (dd, *J* = 10.4, 4.6 Hz, 2H), 7.20 (d, *J* = 6.9 Hz, 5H), 3.58 (d, *J* = 13.3 Hz, 1H), 3.42 (d, *J* = 13.3 Hz, 1H), 2.64 (d, *J* = 1.5 Hz, 1H); <sup>13</sup>C NMR (100 MHz, CDCl<sub>3</sub>) δ 205.03, 165.71, 133.15, 132.90, 132.63, 130.85, 128.95, 128.34, 128.10, 127.57, 84.13, 78.75, 75.09, 45.91; HRMS (ESI) calcd for (C<sub>18</sub>H<sub>14</sub>NOS)<sup>+</sup> [M + H]<sup>+</sup> 292.0791, found 292.0796; [α]<sub>D</sub><sup>20</sup> +18.6 (c 0.5, CHCl<sub>3</sub>); HPLC (Daicel CHIRALPAK OD-H, Hexane : Isopropanol = 97 : 3, Flow rate = 0.3 mL/min, λ = 254 nm): t<sub>R</sub> = 20.19 min (minor enantiomer), t<sub>R</sub> = 22.77 min (major enantiomer).

**<sup>1</sup>H NMR, <sup>13</sup>C NMR, MS, HPLC and specific rotation data of 5**

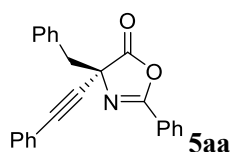

(*R*)-4-benzyl-2-phenyl-4-(phenylethynyl)oxazol-5(4H)-one (**5aa**): following general procedure: **2a** (25.1 mg, 0.1 mmol, 1.0 eq.), **3a** (41.8 mg, 0.12 mmol, 1.2 eq.), catalyst **H** (3.8 mg, 0.005 mmol), was added in toluene (1.0 mL) and then K<sub>2</sub>CO<sub>3</sub> (27.6 mg, 0.20 mmol) was added; flash chromatography with PE:EA = 100:1, white solid, 24.57 mg, 70% yield, 73% ee; <sup>1</sup>H NMR (400 MHz, CDCl<sub>3</sub>) δ 7.93 – 7.88 (m, 2H), 7.55 (t, *J* = 7.4 Hz, 1H), 7.45 (dt, *J* = 13.3, 4.5 Hz, 4H), 7.37 – 7.29 (m, 3H), 7.29 – 7.25 (m, 2H), 7.22 (dt, *J* = 12.6, 4.2 Hz, 3H), 3.58 (d, *J* = 13.4 Hz, 1H), 3.48 (d, *J* = 13.5 Hz, 1H); <sup>13</sup>C NMR (100 MHz, CDCl<sub>3</sub>) δ 174.85, 161.69, 133.19, 133.03, 132.12, 130.70, 129.15, 128.84, 128.37, 128.31, 128.20, 127.83, 125.30, 121.61, 86.74, 82.79, 68.20, 45.19. HRMS (ESI) calcd for (C<sub>24</sub>H<sub>18</sub>NO<sub>2</sub>)<sup>+</sup> [M + H]<sup>+</sup> 352.1332, found 352.1330; [α]<sub>D</sub><sup>20</sup> +37.4 (*c* 0.25, CHCl<sub>3</sub>); HPLC (Daicel CHIRALPAK OD-H, Hexane : Isopropanol = 95 : 5, Flow rate = 0.5 mL/min, λ = 254 nm): t<sub>R</sub> = 11.31 min (minor enantiomer), t<sub>R</sub> = 12.47 min (major enantiomer)

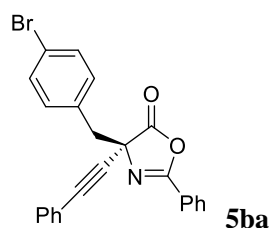

(*R*)-4-(4-bromobenzyl)-2-phenyl-4-(phenylethynyl)oxazol-5(4H)-one (**5ba**): following general procedure: **2b** (32.9 mg, 0.1 mmol, 1.0 eq.), **3a** (41.8 mg, 0.12 mmol, 1.2 eq.), catalyst **H** (3.8 mg, 0.005 mmol), was added in toluene (1.0 mL) and then K<sub>2</sub>CO<sub>3</sub> (27.6 mg, 0.20 mmol) was added; flash chromatography with PE:EA = 100:1, white solid, 30.46 mg, 71% yield, 50% ee; <sup>1</sup>H NMR (400 MHz, CDCl<sub>3</sub>) δ 7.98 – 7.87 (m, 2H), 7.58 (t, *J* = 7.5 Hz, 1H), 7.50 – 7.42 (m, 4H), 7.38 – 7.27 (m, 5H), 7.15 (d, *J* = 8.4 Hz, 2H), 3.52 (d, *J* = 13.5 Hz, 1H), 3.41 (d, *J* = 13.5 Hz, 1H); <sup>13</sup>C NMR (100 MHz, CDCl<sub>3</sub>) δ 174.61, 161.93, 133.40, 132.38, 132.17, 132.10, 131.48, 129.26, 128.94, 128.41, 128.26, 125.13, 122.12, 121.44, 87.02, 82.44, 67.85, 44.38; HRMS (ESI) calcd for (C<sub>24</sub>H<sub>17</sub>BrNO<sub>2</sub>)<sup>+</sup> [M + H]<sup>+</sup> 430.0437, found 430.0435; [α]<sub>D</sub><sup>20</sup> +39.6 (*c* 0.5, CHCl<sub>3</sub>); HPLC (Daicel CHIRALPAK IA, Hexane : Isopropanol = 97 : 3, Flow rate = 0.3 mL/min, λ = 254 nm): t<sub>R</sub> = 23.61 min (major enantiomer), t<sub>R</sub> = 26.05 min (minor enantiomer).

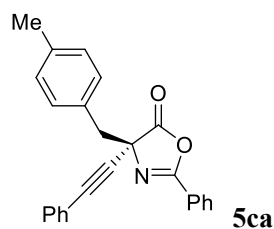

(*R*)-4-(4-methylbenzyl)-2-phenyl-4-(phenylethynyl)oxazol-5(4H)-one (**5ca**): following general procedure: **2c** (26.5 mg, 0.1 mmol, 1.0 eq.), **3a** (41.8 mg, 0.12 mmol, 1.2 eq.), catalyst **H** (3.8 mg, 0.005 mmol), was added in toluene (1.0 mL) and then K<sub>2</sub>CO<sub>3</sub> (27.6 mg, 0.20 mmol) was added;



flash chromatography with PE:EA = 100:1, white solid, 27.74 mg, 76% yield, 56% ee;  $^1\text{H}$  NMR (400 MHz,  $\text{CDCl}_3$ )  $\delta$  7.96 – 7.86 (m, 2H), 7.56 (dd,  $J$  = 8.3, 6.6 Hz, 1H), 7.46 (ddd,  $J$  = 12.4, 7.6, 4.5 Hz, 4H), 7.37 – 7.26 (m, 3H), 7.14 (d,  $J$  = 8.0 Hz, 2H), 7.01 (d,  $J$  = 7.9 Hz, 2H), 3.54 (d,  $J$  = 13.5 Hz, 1H), 3.44 (d,  $J$  = 13.5 Hz, 1H), 2.24 (s, 3H);  $^{13}\text{C}$  NMR (100 MHz,  $\text{CDCl}_3$ )  $\delta$  169.00, 155.78, 131.59, 127.28, 126.25, 124.67, 124.04, 123.24, 123.15, 122.96, 122.49, 122.36, 119.52, 115.79, 80.76, 77.04, 62.42, 38.92, 23.94; HRMS (ESI) calcd for  $(\text{C}_{25}\text{H}_{20}\text{NO}_2)^+ [\text{M} + \text{H}]^+$  366.1489, found 366.1492;  $[\alpha]_{\text{D}}^{20} +30.4$  ( $c$  0.5,  $\text{CHCl}_3$ ); HPLC (Daicel CHIRALPAK OD-H, Hexane : Isopropanol = 97 : 3, Flow rate = 0.3 mL/min,  $\lambda$  = 254 nm):  $t_{\text{R}}$  = 23.78 min (major enantiomer),  $t_{\text{R}}$  = 25.26 min (minor enantiomer).

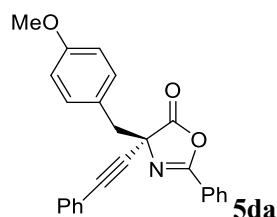

(*R*)-4-(4-methoxybenzyl)-2-phenyl-4-(phenylethynyl)oxazol-5(4H)-one (**5da**): following general procedure: **2d** (28.1 mg, 0.1 mmol, 1.0 eq.), **3a** (41.8 mg, 0.12 mmol, 1.2 eq.), catalyst **H** (3.8 mg, 0.005 mmol), was added in toluene (1.0 mL) and then  $\text{K}_2\text{CO}_3$  (27.6 mg, 0.20 mmol) was added; flash chromatography with PE:EA = 100:1, white solid, 26.29 mg, 69% yield, 63% ee;  $^1\text{H}$  NMR (400 MHz,  $\text{CDCl}_3$ )  $\delta$  7.93 (dd,  $J$  = 8.3, 1.1 Hz, 2H), 7.59 – 7.54 (m, 1H), 7.51 – 7.42 (m, 4H), 7.38 – 7.28 (m, 3H), 7.22 – 7.16 (m, 2H), 6.79 – 6.71 (m, 2H), 3.72 (s, 3H), 3.54 (d,  $J$  = 13.6 Hz, 1H), 3.45 (d,  $J$  = 13.6 Hz, 1H);  $^{13}\text{C}$  NMR (100 MHz,  $\text{CDCl}_3$ )  $\delta$  174.92, 161.67, 159.16, 133.18, 132.12, 131.78, 129.13, 128.85, 128.37, 128.22, 125.34, 125.03, 121.65, 113.71, 86.65, 82.89, 68.38, 55.24, 44.44; HRMS (ESI) calcd for  $(\text{C}_{25}\text{H}_{20}\text{NO}_3)^+ [\text{M} + \text{H}]^+$  382.1438, found 382.1434;  $[\alpha]_{\text{D}}^{20} +42.0$  ( $c$  0.5,  $\text{CHCl}_3$ ); HPLC (Daicel CHIRALPAK IA, Hexane : Isopropanol = 97 : 3, Flow rate = 0.3 mL/min,  $\lambda$  = 254 nm):  $t_{\text{R}}$  = 27.32 min (major enantiomer),  $t_{\text{R}}$  = 29.68 min (minor enantiomer).

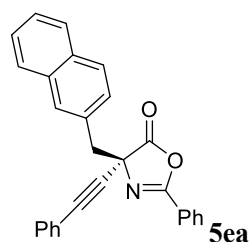

(*R*)-4-(naphthalen-2-ylmethyl)-2-phenyl-4-(phenylethynyl)oxazol-5(4H)-one (**5ea**): following general procedure: **2e** (30.1 mg, 0.1 mmol, 1.0 eq.), **3a** (41.8 mg, 0.12 mmol, 1.2 eq.), catalyst **H** (3.8 mg, 0.005 mmol), was added in toluene (1.0 mL) and then  $\text{K}_2\text{CO}_3$  (27.6 mg, 0.20 mmol) was added; flash chromatography with PE:EA = 100:1, white solid, 30.07 mg, 75% yield, 57% ee;  $^1\text{H}$  NMR (400 MHz,  $\text{CDCl}_3$ )  $\delta$  7.93 – 7.85 (m, 2H), 7.75 (s, 3H), 7.69 (d,  $J$  = 8.4 Hz, 1H), 7.52 (t,  $J$  = 7.4 Hz, 1H), 7.47 (d,  $J$  = 6.5 Hz, 2H), 7.41 (dd,  $J$  = 8.3, 3.9 Hz, 5H), 7.36 – 7.26 (m, 3H), 3.75 (d,  $J$  = 13.4 Hz, 1H), 3.65 (d,  $J$  = 13.5 Hz, 1H);  $^{13}\text{C}$  NMR (100 MHz,  $\text{CDCl}_3$ )  $\delta$  174.83, 161.84, 133.25, 133.20, 132.80, 132.13, 130.71, 129.83, 129.17, 128.82, 128.55, 128.38, 128.23, 127.99, 127.80, 127.65, 126.08, 126.05, 125.25, 121.60, 86.87, 82.86, 68.34, 45.25; HRMS (ESI) calcd for  $(\text{C}_{28}\text{H}_{20}\text{NO}_2)^+ [\text{M} + \text{H}]^+$  402.1489, found 402.1486;  $[\alpha]_{\text{D}}^{20} +13.40$  ( $c$  0.5,  $\text{CHCl}_3$ ); HPLC (Daicel CHIRALPAK IA, Hexane : Isopropanol = 95 : 5, Flow rate = 0.5 mL/min,  $\lambda$  = 254 nm):  $t_{\text{R}}$  = 14.32 min (major enantiomer),  $t_{\text{R}}$

= 16.22 min (minor enantiomer).

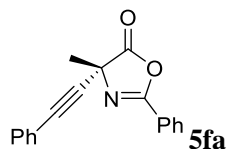

(*R*)-4-methyl-2-phenyl-4-(phenylethynyl)oxazol-5(4H)-one (**5fa**): following general procedure:**2f** (17.5 mg, 0.1 mmol, 1.0 eq.), **3a** (41.8 mg, 0.12 mmol, 1.2 eq.), catalyst **H** (3.8 mg, 0.005 mmol), was added in toluene (1.0 mL) and then  $K_2CO_3$  (27.6 mg, 0.20 mmol) was added; flash chromatography with PE:EA = 100:1, white solid, 18.97 mg, 69% yield, 27% ee;  $^1H$  NMR (400 MHz,  $CDCl_3$ )  $\delta$  8.07 – 8.01 (m, 2H), 7.63 – 7.56 (m, 1H), 7.50 (t,  $J$  = 7.7 Hz, 2H), 7.46 (dd,  $J$  = 7.8, 1.7 Hz, 2H), 7.37 – 7.26 (m, 3H), 1.89 (s, 3H).  $^{13}C$  NMR (100 MHz,  $CDCl_3$ )  $\delta$  175.87, 161.72, 133.33, 132.10, 129.11, 128.96, 128.35, 128.33, 125.51, 121.61, 85.57, 83.52, 63.37, 26.01. HRMS (ESI) calcd for  $(C_{18}H_{14}NO_2)^+$   $[M + H]^+$  276.1019, found 276.1021;  $[\alpha]_D^{20}$  -2.4 ( $c$  0.5,  $CHCl_3$ ); HPLC (Daicel CHIRALPAK OD-H, Hexane : Isopropanol = 97 : 3, Flow rate = 0.3 mL/min,  $\lambda$  = 254 nm):  $t_R$  = 20.92min (major enantiomer),  $t_R$  = 22.67 min (minor enantiomer).

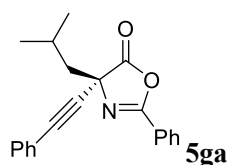

(*R*)-4-isobutyl-2-phenyl-4-(phenylethynyl)oxazol-5(4H)-one (**5ga** known compound<sup>[21]</sup>): following general procedure: **2g** (21.7 mg, 0.1 mmol, 1.0 eq.), **3a** (41.8 mg, 0.12 mmol, 1.2 eq.), catalyst **H** (3.8 mg, 0.005 mmol), was added in toluene (1.0 mL) and then  $K_2CO_3$  (27.6 mg, 0.20 mmol) was added; flash chromatography with PE:EA = 100:1, white solid, 17.44 mg, 55% yield, 53% ee; HRMS (ESI) calcd for  $(C_{21}H_{20}NO_2)^+$   $[M + H]^+$  318.1489, found 318.1486;  $[\alpha]_D^{20}$  +31.0 ( $c$  0.5,  $CHCl_3$ ); HPLC (Daicel CHIRALPAK OJ-H, Hexane : Isopropanol = 97 : 3, Flow rate = 0.3 mL/min,  $\lambda$  = 254 nm):  $t_R$  = 18.49 min (major enantiomer),  $t_R$  = 19.77 min (minor enantiomer).

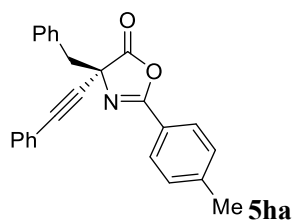

(*R*)-4-benzyl-4-(phenylethynyl)-2-(p-tolyl)oxazol-5(4H)-one (**5ha**): following general procedure: **2h** (26.5 mg, 0.1 mmol, 1.0 eq.), **3a** (41.8 mg, 0.12 mmol, 1.2 eq.), catalyst **H** (3.8 mg, 0.005 mmol), was added in toluene (1.0 mL) and then  $K_2CO_3$  (27.6 mg, 0.20 mmol) was added; flash chromatography with PE:EA = 100:1, white solid, 29.20 mg, 80% yield, 59% ee;  $^1H$  NMR (400 MHz,  $CDCl_3$ )  $\delta$  7.79 (d,  $J$  = 8.2 Hz, 2H), 7.48 – 7.44 (m, 2H), 7.31 (ddd,  $J$  = 7.3, 4.6, 2.9 Hz, 3H), 7.29 – 7.26 (m, 1H), 7.26 – 7.24 (m, 2H), 7.24 – 7.15 (m, 4H), 3.57 (d,  $J$  = 13.4 Hz, 1H), 3.47 (d,  $J$  = 13.4 Hz, 1H), 2.40 (s, 3H);  $^{13}C$  NMR (100 MHz,  $CDCl_3$ )  $\delta$  174.99, 161.75, 144.01, 133.11, 132.12, 130.71, 129.58, 129.11, 128.36, 128.29, 128.18, 127.79, 122.48, 121.67, 86.64, 82.97, 68.13, 45.22, 21.86. HRMS (ESI) calcd for  $(C_{25}H_{20}NO_2)^+$   $[M + H]^+$  366.1489, found 366.1491;  $[\alpha]_D^{20}$  +59.6 ( $c$  0.5,

CHCl<sub>3</sub>); HPLC (Daicel CHIRALPAK IA, Hexane : Isopropanol = 97 : 3, Flow rate = 0.3 mL/min,  $\lambda$  = 254 nm):  $t_R$  = 22.61 min (major enantiomer),  $t_R$  = 25.17 min (minor enantiomer).

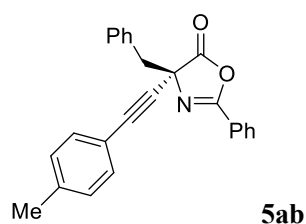

(*R*)-4-benzyl-2-phenyl-4-(*p*-tolylethynyl)oxazol-5(4H)-one (**5ab**): following general procedure: **2a** (25.1 mg, 0.1 mmol, 1.0 eq.), **3b** (43.4 mg, 0.12 mmol, 1.2 eq.), catalyst **H** (3.8 mg, 0.005 mmol), was added in toluene (1.0 mL) and then K<sub>2</sub>CO<sub>3</sub> (27.6 mg, 0.20 mmol) was added; flash chromatography with PE:EA = 100:1, white solid, 27.37 mg, 75% yield, 53% ee; <sup>1</sup>H NMR (400 MHz, CDCl<sub>3</sub>)  $\delta$  7.90 (d,  $J$  = 7.9 Hz, 2H), 7.55 (t,  $J$  = 7.4 Hz, 1H), 7.43 (t,  $J$  = 7.7 Hz, 2H), 7.35 (d,  $J$  = 8.0 Hz, 2H), 7.27 (s, 2H), 7.20 (d,  $J$  = 7.0 Hz, 3H), 7.11 (d,  $J$  = 8.0 Hz, 2H), 3.57 (d,  $J$  = 13.4 Hz, 1H), 3.47 (d,  $J$  = 13.5 Hz, 1H), 2.34 (s, 3H); <sup>13</sup>C NMR (100 MHz, CDCl<sub>3</sub>)  $\delta$  174.95, 161.61, 139.37, 133.17, 133.09, 132.02, 130.70, 129.14, 128.83, 128.30, 128.19, 127.81, 125.33, 118.53, 86.95, 82.10, 68.24, 45.22, 21.66; HRMS (ESI) calcd for (C<sub>25</sub>H<sub>20</sub>NO<sub>2</sub>)<sup>+</sup> [M + H]<sup>+</sup> 366.1489, found 366.1491; [ $\alpha$ ]<sub>D</sub><sup>20</sup> +42.8 (*c* 0.5, CHCl<sub>3</sub>); HPLC (Daicel CHIRALPAK IA, Hexane : Isopropanol = 97 : 3, Flow rate = 0.3 mL/min,  $\lambda$  = 254 nm):  $t_R$  = 21.85 min (major enantiomer),  $t_R$  = 25.19 min (minor enantiomer).

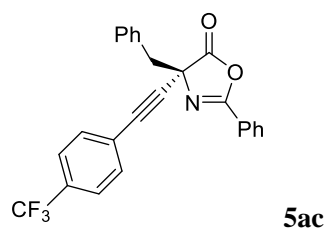

(*R*)-4-benzyl-2-phenyl-4-((4-(trifluoromethyl)phenyl)ethynyl)thiazol-5(4H)-one (**5ac**): following general procedure: **2a** (25.1 mg, 0.1 mmol, 1.0 eq.), **3c** (49.9 mg, 0.12 mmol, 1.2 eq.), catalyst **H** (3.8 mg, 0.005 mmol), was added in toluene (1.0 mL) and then K<sub>2</sub>CO<sub>3</sub> (27.6 mg, 0.20 mmol) was added; flash chromatography with PE:EA = 100:1, white solid, 27.23 mg, 65% yield, 27% ee; <sup>1</sup>H NMR (400 MHz, CDCl<sub>3</sub>)  $\delta$  7.91 (d,  $J$  = 8.3 Hz, 2H), 7.61 – 7.52 (m, 5H), 7.45 (t,  $J$  = 7.8 Hz, 2H), 7.26 (dd,  $J$  = 8.7, 1.8 Hz, 2H), 7.24 – 7.17 (m, 3H), 3.58 (d,  $J$  = 13.4 Hz, 1H), 3.48 (d,  $J$  = 13.4 Hz, 1H); <sup>13</sup>C NMR (100 MHz, CDCl<sub>3</sub>)  $\delta$  174.52, 161.98, 133.35, 132.79, 132.39, 130.88 (q,  $J_{C-F}$  = 32 Hz), 130.68, 128.90, 128.37, 128.22, 127.96, 125.38, 125.34, 125.29, 125.13, 123.84 (q,  $J_{C-F}$  = 273 Hz), 85.28, 85.18, 68.12, 45.08; HRMS (ESI) calcd for (C<sub>25</sub>H<sub>17</sub>F<sub>3</sub>NO<sub>2</sub>)<sup>+</sup> [M + H]<sup>+</sup> 420.1206, found 420.1209; [ $\alpha$ ]<sub>D</sub><sup>20</sup> +18.8 (*c* 0.5, CHCl<sub>3</sub>); HPLC (Daicel CHIRALPAK OD-H, Hexane : Isopropanol = 95:5, Flow rate = 0.5 mL/min,  $\lambda$  = 254 nm):  $t_R$  = 12.58 min (major enantiomer),  $t_R$  = 14.13 min (minor enantiomer).

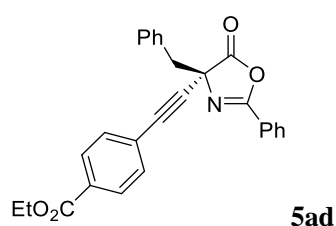

(*R*)-4-((4-benzyl-5-oxo-2-phenyl-4,5-dihydrooxazol-4-yl)ethynyl)phenyl propionate (**5ad**): following general procedure: **2a** (25.1 mg, 0.1 mmol, 1.0 eq.), **3d** (50.4 mg, 0.12 mmol, 1.2 eq.), catalyst **H** (3.8 mg, 0.005 mmol), was added in toluene (1.0 mL) and then K<sub>2</sub>CO<sub>3</sub> (27.6 mg, 0.20 mmol) was added; flash chromatography with PE:EA = 100:1, white solid, 32.99 mg, 78% yield, 60% ee; <sup>1</sup>H NMR (400 MHz, CDCl<sub>3</sub>) δ 8.01 – 7.96 (m, 2H), 7.91 (dd, *J* = 8.3, 1.0 Hz, 2H), 7.56 – 7.49 (m, 3H), 7.47 – 7.41 (m, 2H), 7.26 (dt, *J* = 9.0, 3.7 Hz, 3H), 7.21 (dd, *J* = 4.7, 2.8 Hz, 2H), 4.36 (q, *J* = 7.1 Hz, 2H), 3.59 (d, *J* = 13.4 Hz, 1H), 3.49 (d, *J* = 13.4 Hz, 1H), 1.38 (t, *J* = 7.1 Hz, 3H); <sup>13</sup>C NMR (100 MHz, CDCl<sub>3</sub>) δ 174.57, 165.98, 161.91, 133.30, 132.84, 132.03, 130.78, 130.68, 129.49, 128.87, 128.35, 128.22, 127.92, 126.07, 125.18, 85.92, 85.49, 68.18, 61.33, 45.08, 14.39; HRMS (ESI) calcd for (C<sub>27</sub>H<sub>22</sub>NO<sub>4</sub>)<sup>+</sup> [M + H]<sup>+</sup> 424.1543, found 424.1550; [α]<sub>D</sub><sup>20</sup> +6.40 (*c* 0.5, CHCl<sub>3</sub>); HPLC (Daicel CHIRALPAK IA, Hexane : Isopropanol = 97 : 3, Flow rate = 0.3 mL/min, λ = 254 nm): t<sub>R</sub> = 32.49 min (major enantiomer), t<sub>R</sub> = 35.80 min (minor enantiomer).

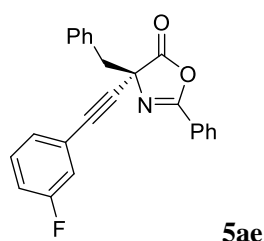

(*R*)-4-benzyl-4-((3-fluorophenyl)ethynyl)-2-phenylthiazol-5(4H)-one (**5ae**): following general procedure: **2a** (25.1 mg, 0.1 mmol, 1.0 eq.), **3e** (43.9 mg, 0.12 mmol, 1.2 eq.), catalyst **H** (3.8 mg, 0.005 mmol), was added in toluene (1.0 mL) and then K<sub>2</sub>CO<sub>3</sub> (27.6 mg, 0.20 mmol) was added; flash chromatography with PE:EA = 100:1, white solid, 23.25 mg, 63% yield, 65% ee; <sup>1</sup>H NMR (400 MHz, CDCl<sub>3</sub>) δ 7.90 (dd, *J* = 5.3, 3.3 Hz, 2H), 7.60 – 7.52 (m, 1H), 7.44 (dd, *J* = 10.7, 4.8 Hz, 2H), 7.27 – 7.24 (m, 4H), 7.24 – 7.18 (m, 3H), 7.18 – 7.13 (m, 1H), 7.08 – 7.02 (m, 1H), 3.57 (d, *J* = 13.4 Hz, 1H), 3.47 (d, *J* = 13.4 Hz, 1H); <sup>13</sup>C NMR (100 MHz, CDCl<sub>3</sub>) δ 174.63, 162.29(d, *J*<sub>C-F</sub>=245 Hz), 161.86, 133.28, 132.88, 130.68, 130.04(d, *J*<sub>C-F</sub>=9 Hz), 128.87, 128.34, 128.21, 128.04, 127.99, 127.91, 125.20, 123.39(d, *J*<sub>C-F</sub>=9 Hz), 118.94(d, *J*<sub>C-F</sub>=23 Hz), 116.62 (d, *J*<sub>C-F</sub>=21 Hz), 85.45, 83.73, 68.11, 45.10; HRMS (ESI) calcd for (C<sub>24</sub>H<sub>17</sub>FNO<sub>2</sub>)<sup>+</sup> [M + H]<sup>+</sup> 370.1238, found 370.1237; [α]<sub>D</sub><sup>20</sup> +40.6 (*c* 0.5, CHCl<sub>3</sub>); HPLC (Daicel CHIRALPAK IA, Hexane : Isopropanol = 97 : 3, Flow rate = 0.3 mL/min, λ = 254 nm): t<sub>R</sub> = 19.86 min (major enantiomer), t<sub>R</sub> = 22.45 min (minor enantiomer).

#### Ring opening of alkylation product **4aa**<sup>[1] [2]</sup>

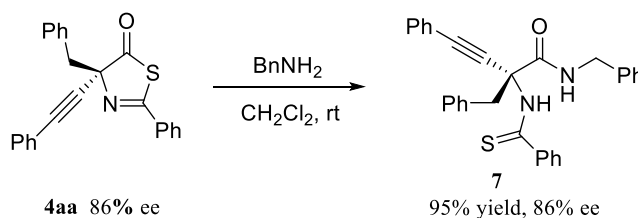

To a solution of **4aa** (36.7 mg, 0.1 mmol, 1.0 eq, 86% ee) in CH<sub>2</sub>Cl<sub>2</sub> was added BnNH<sub>2</sub> (22 μL, 0.2 mmol, 2.0 eq) under N<sub>2</sub>. The reaction mixture was vigorously stirred at ambient temperature for 24 h. After consumption of the starting material **4aa** which was monitored by TLC, the reaction mixture was quenched by water, and then extracted with CH<sub>2</sub>Cl<sub>2</sub> three times. The combined organic extracts were dried over anhydrous Na<sub>2</sub>SO<sub>4</sub>, and concentrated after filtration. After evaporation of

the solvent, the residue was purified by column chromatography (hexane: ethyl acetate =10:1) to give **7** (45.03 mg, 0.095 mmol, 95% yield, 86% ee).

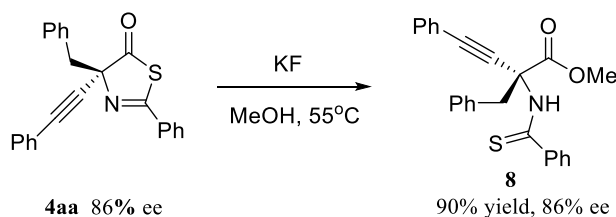

In a sealed tube, a solution of **4aa** (36.7 mg, 0.1 mmol, 1.0 eq, 86% ee) in MeOH was added KF (0.3 mmol, 3.0 eq) under  $\text{N}_2$ . The reaction mixture was vigorously stirred at 55 °C for 0.5 h. After consumption of the starting material **4aa** which was monitored by TLC, the reaction mixture was quenched by water, and the organic phase was extracted with  $\text{CH}_2\text{Cl}_2$  three times. The combined organic extracts were dried over anhydrous  $\text{Na}_2\text{SO}_4$ , and concentrated after filtration. The residue was purified by column chromatography (hexane: ethyl acetate =10:1) to give **8** (35.91 mg, 0.09 mmol, 90% yield, 86% ee).

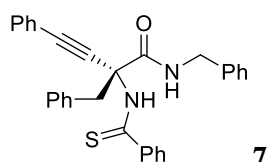

(*R*)-*N*,2-dibenzyl-4-phenyl-2-phenylthioamidobut-3-ynamide (**7**): flash chromatography with PE:EA = 10:1, white solid, 45.03 mg, 95% yield, 86% ee;  $^1\text{H}$  NMR (400 MHz,  $\text{CDCl}_3$ )  $\delta$  7.89 – 7.81 (m, 2H), 7.61 (s, 1H), 7.55 – 7.49 (m, 1H), 7.45 (ddt,  $J$  = 12.7, 11.5, 4.6 Hz, 6H), 7.27 (ddt,  $J$  = 8.5, 3.8, 1.6 Hz, 6H), 7.22 – 7.18 (m, 3H), 7.09 (dt,  $J$  = 7.3, 3.7 Hz, 2H), 6.78 (t,  $J$  = 5.8 Hz, 1H), 4.58 (dd,  $J$  = 15.1, 6.7 Hz, 1H), 4.30 (dd,  $J$  = 15.1, 5.3 Hz, 1H), 3.61 (d,  $J$  = 13.2 Hz, 1H), 3.40 (d,  $J$  = 13.2 Hz, 1H);  $^{13}\text{C}$  NMR (100 MHz,  $\text{CDCl}_3$ )  $\delta$  171.01, 168.32, 138.39, 138.07, 137.06, 135.70, 132.39, 132.20, 131.12, 128.89, 128.70, 128.66, 128.38, 127.83, 127.52, 127.38, 127.27, 126.79, 123.53, 92.27, 48.95, 43.49; HRMS (ESI) calcd for  $(\text{C}_{31}\text{H}_{27}\text{N}_2\text{OS})^+$   $[\text{M} + \text{H}]^+$  475.1839, found 475.1855;  $[\alpha]_{\text{D}}^{20}$  -20.0 ( $c$  0.5,  $\text{CHCl}_3$ ); HPLC (Daicel CHIRALPAK OD-H, Hexane : Isopropanol = 95 : 5, Flow rate = 0.5 mL/min,  $\lambda$  = 254 nm):  $t_{\text{R}}$  = 21.01 min (minor enantiomer),  $t_{\text{R}}$  = 22.59 min (major enantiomer).

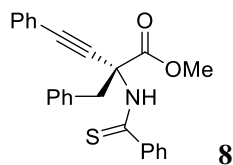

methyl (*R*)-2-benzyl-4-phenyl-2-phenylthioamidobut-3-ynoate (**8**): flash chromatography with PE:EA = 10:1, white solid, 35.91 mg, 90% yield, 86% ee;  $^1\text{H}$  NMR (400 MHz,  $\text{CDCl}_3$ )  $\delta$  7.85 – 7.74 (m, 2H), 7.48 (dd,  $J$  = 6.5, 4.3 Hz, 1H), 7.46 – 7.35 (m, 6H), 7.26 (d,  $J$  = 6.2 Hz, 1H), 7.18 (s, 2H), 7.12 (s, 3H), 6.95 (d,  $J$  = 4.8 Hz, 1H), 3.77 (d,  $J$  = 4.9 Hz, 3H), 3.72 (dd,  $J$  = 13.6, 4.7 Hz, 1H), 3.47 (dd,  $J$  = 13.5, 4.7 Hz, 1H);  $^{13}\text{C}$  NMR (100 MHz,  $\text{CDCl}_3$ )  $\delta$  171.22, 167.66, 139.78, 136.36, 135.04, 132.46, 131.89, 131.11, 128.76, 128.37, 128.15, 127.74, 127.40, 126.75, 121.41, 93.16, 53.38, 46.33; HRMS (ESI) calcd for  $(\text{C}_{25}\text{H}_{22}\text{NO}_2\text{S})^+$   $[\text{M} + \text{H}]^+$  400.1366, found 400.1372;  $[\alpha]_{\text{D}}^{20}$  +72.6 ( $c$  0.5,  $\text{CHCl}_3$ );

HPLC (Daicel CHIRALPAK OJ-H, Hexane : Isopropanol = 95: 5, Flow rate = 0.5 mL/min,  $\lambda$  = 254 nm):  $t_R$  = 35.95 min (minor enantiomer),  $t_R$  = 53.01 min (major enantiomer).

### Ring opening of alkylation product **5aa**

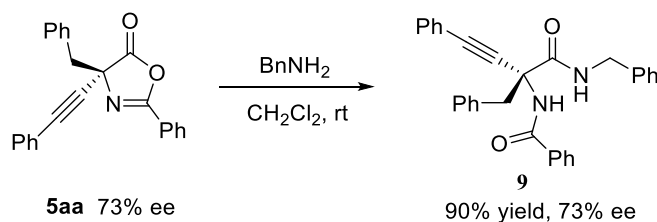

To a solution of **5aa** (35.1 mg, 0.1 mmol, 1.0 eq, 73% ee) in  $\text{CH}_2\text{Cl}_2$  was added  $\text{BnNH}_2$  (22  $\mu\text{L}$ , 0.2 mmol, 2.0 eq) under  $\text{N}_2$ . The reaction mixture was vigorously stirred at ambient temperature for 24 h. After consumption of the starting material **5aa** which was monitored by TLC, the reaction mixture was quenched by water, and the organic phase was extracted with  $\text{CH}_2\text{Cl}_2$  three times. The combined organic extracts were dried over anhydrous  $\text{Na}_2\text{SO}_4$ , and concentrated after filtration. After evaporation of the solvent, the residue was purified by column chromatography (hexane: ethyl acetate = 10:1) to give **9** (41.22 mg, 0.090 mmol, 90% yield, 73% ee).

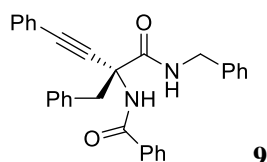

(R)-N-(2-benzyl-1-(benzylamino)-1-oxo-4-phenylbut-3-yn-2-yl)benzamide (**9**): flash chromatography with PE:EA = 10:1, white solid, 41.22 mg, 90% yield, 73% ee;  $^1\text{H}$  NMR (400 MHz,  $\text{CDCl}_3$ )  $\delta$  7.82 – 7.76 (m, 2H), 7.50 (dd,  $J$  = 8.4, 6.3 Hz, 1H), 7.46 – 7.40 (m, 2H), 7.40 – 7.36 (m, 2H), 7.34 – 7.25 (m, 11H), 7.23 – 7.14 (m, 3H), 6.82 (t,  $J$  = 5.6 Hz, 1H), 4.50 (dd,  $J$  = 15.0, 5.8 Hz, 1H), 4.42 (dd,  $J$  = 15.0, 5.7 Hz, 1H), 3.67 (d,  $J$  = 12.9 Hz, 1H), 3.52 (d,  $J$  = 12.9 Hz, 1H);  $^{13}\text{C}$  NMR (100 MHz,  $\text{CDCl}_3$ )  $\delta$  168.80, 166.18, 137.44, 134.66, 134.12, 131.94, 131.90, 130.75, 129.02, 128.80, 128.65, 128.40, 128.34, 127.72, 127.66, 127.29, 121.82, 88.35, 86.23, 59.39, 44.43, 44.30; HRMS (ESI) calcd for  $(\text{C}_{31}\text{H}_{27}\text{N}_2\text{O}_2)^+$   $[\text{M} + \text{H}]^+$  459.2067, found 459.2077;  $[\alpha]_{\text{D}}^{20}$  +3.60 ( $c$  0.5,  $\text{CHCl}_3$ ); HPLC (Daicel CHIRALPAK AS-H, Hexane : Isopropanol = 95:5, Flow rate = 0.5 mL/min,  $\lambda$  = 254 nm):  $t_R$  = 24.00 min (major enantiomer),  $t_R$  = 31.55 min (minor enantiomer).

### General procedure for the synthesis of 4-benzyl-2-phenylthiazol-5(4H)-one substrates **1b-1i**, **1o**, **1n**

Known compounds **1a**<sup>[3]</sup>, **1j**<sup>[3]</sup>, **1k**<sup>[1]</sup> and **1l**<sup>[4]</sup> were prepared by literature procedures. New compounds **1b**, **1c**, **1d**, **1e**, **1f**, **1g**, **1h**, **1i**, **1o** and **1m** were prepared according to literature procedures.<sup>[5] [3]</sup>

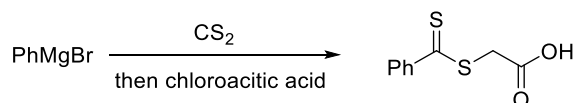

**Step 1:** In a round-bottom flask, following flame drying, 40 ml of 1M phenyl magnesium bromide (40 mmol) in THF was added. It was then cooled to 0 °C, and 2.42 ml of carbon disulfide (40 mmol) was slowly introduced dropwise. It was stirred at room temperature for 12 hr and then poured into 100 g of ice water and 3.78 g of chloroacetic acid (40 mmol). Anhydrous sodium carbonate 3.36 g

(20 mmol) was added and stirred for 24 hr at 90 °C. The liquid was adjusted to pH 2 with concentrated hydrochloric acid, and a red solid was obtained in 72% yield by recrystallization in a mixture of ethyl acetate and hexane.

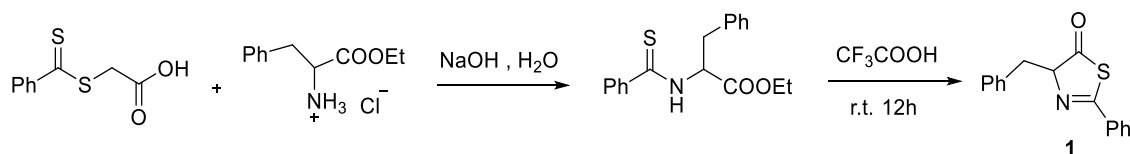

**Step 2:** 2-((phenylcarbothioyl)thio)acetic acid (2 g, 9.43 mmol) was dissolved in 1 M NaOH (28.3 mL, 3 eq) solution, then 1-carboxy-2-phenylethan-1-aminium chloride was added. After consumption of the starting material, the reaction mixture was acidified to pH 7-8 with dilute HCl (aq). The aqueous layer was extracted with EtOAc (15 mL  $\times$  3). The combined organic layers were dried over Na<sub>2</sub>SO<sub>4</sub>, filtered and concentrated under reduced pressure. The residue was loaded onto a column packed with silica gel, and eluted with petroleum ether/ethyl acetate (10:1) to afford ethyl (phenylcarbothioyl)phenylalaninate as light green solid (50% yield, 1.08 g).

**Step 3:** A solution of ethyl (phenylcarbothioyl)phenylalaninate (1.08 g, 4.56 mmol) in anhydrous trifluoroacetic acid (13.5 ml) was set aside at room temp. overnight, evaporation in vacuo, followed by trituration of the residual oil with aqueous sodium hydrogen carbonate, gave pure DL-4-benzyl-2-phenylthiazol-5(4H)-thione (1.21 g, 100% yield), other products were obtained by similar treatment of the amino-acid derivative.

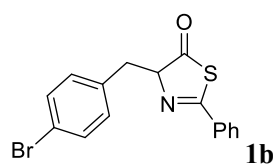

4-(4-bromobenzyl)-2-phenylthiazol-5(4H)-one (**1b**): light yellow solid, 1.55 g, 99% yield; <sup>1</sup>H NMR (400 MHz, DMSO-*d*<sub>6</sub>)  $\delta$  11.11 (s, 1H), 7.67 (d, *J* = 7.2 Hz, 2H), 7.43 (d, *J* = 8.3 Hz, 2H), 7.36 (t, *J* = 7.3 Hz, 2H), 7.33 – 7.27 (m, 1H), 7.19 (d, *J* = 8.3 Hz, 2H), 3.87 (s, 2H); <sup>13</sup>C NMR (100 MHz, DMSO-*d*<sub>6</sub>)  $\delta$  153.23, 150.85, 140.23, 134.67, 134.42, 131.64, 131.20, 129.51, 129.39, 125.35, 119.46, 32.51; HRMS (ESI) calcd for (C<sub>16</sub>H<sub>13</sub>BrNOS)<sup>+</sup> [M + H]<sup>+</sup> 345.9896, found 345.9901.

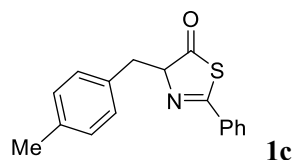

4-(4-methylbenzyl)-2-phenylthiazol-5(4H)-one (**1c**): light yellow solid, 1.27 g, 99% yield; <sup>1</sup>H NMR (400 MHz, DMSO-*d*<sub>6</sub>)  $\delta$  10.97 (s, 1H), 7.67 (t, *J* = 6.8 Hz, 2H), 7.46 – 7.20 (m, 3H), 7.18 – 6.96 (m, 4H), 3.84 (d, *J* = 7.2 Hz, 2H), 2.20 (d, *J* = 7.6 Hz, 3H); <sup>13</sup>C NMR (100 MHz, DMSO-*d*<sub>6</sub>)  $\delta$  152.80, 150.65, 137.73, 135.63, 135.24, 134.50, 129.49, 129.33, 128.83, 125.31, 32.74, 21.14; HRMS (ESI) calcd for (C<sub>17</sub>H<sub>16</sub>NOS)<sup>+</sup> [M + H]<sup>+</sup> 282.0947, found 282.0955

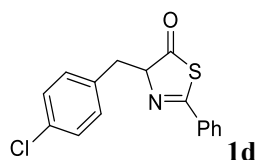

4-(4-chlorobenzyl)-2-phenylthiazol-5(4H)-one (**1d**): light yellow solid, 1.36 g, 99% yield;  $^1\text{H}$  NMR (400 MHz,  $\text{DMSO-}d_6$ )  $\delta$  7.67 (d,  $J = 7.4$  Hz, 2H), 7.36 (t,  $J = 7.2$  Hz, 2H), 7.33 – 7.27 (m, 3H), 7.24 (d,  $J = 8.2$  Hz, 2H), 3.88 (s, 2H);  $^{13}\text{C}$  NMR (100 MHz,  $\text{DMSO-}d_6$ )  $\delta$  153.46, 150.66, 139.83, 134.58, 134.43, 131.01, 130.78, 129.51, 129.36, 128.72, 125.32, 32.44. HRMS (ESI) calcd for  $(\text{C}_{16}\text{H}_{13}\text{ClNOS})^+ [\text{M} + \text{H}]^+$  302.0401, found 302.0416.

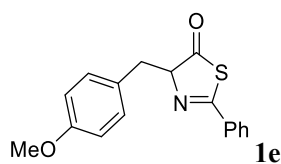

4-(4-methoxybenzyl)-2-phenylthiazol-5(4H)-one (**1e**): light yellow solid, 1.34 g, 99% yield;  $^1\text{H}$  NMR (400 MHz,  $\text{DMSO-}d_6$ )  $\delta$  11.05 (s, 1H), 7.68 (d,  $J = 7.4$  Hz, 2H), 7.33 (dt,  $J = 23.5, 7.1$  Hz, 3H), 7.13 (t,  $J = 11.9$  Hz, 2H), 6.80 (d,  $J = 8.4$  Hz, 2H), 3.82 (s, 2H), 3.66 (s, 3H);  $^{13}\text{C}$  NMR (100 MHz,  $\text{DMSO-}d_6$ )  $\delta$  158.01, 152.87, 150.54, 135.77, 134.54, 132.77, 129.88, 129.48, 129.27, 125.30, 114.19, 55.48, 32.26. HRMS (ESI) calcd for  $(\text{C}_{17}\text{H}_{16}\text{NO}_2\text{S})^+ [\text{M} + \text{H}]^+$  298.0896, found 298.0908.

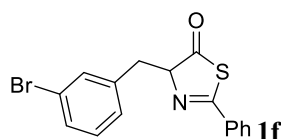

4-(3-bromobenzyl)-2-phenylthiazol-5(4H)-one (**1f**): light yellow solid, 1.56 g, 99% yield;  $^1\text{H}$  NMR (400 MHz,  $\text{DMSO-}d_6$ )  $\delta$  7.67 (d,  $J = 7.3$  Hz, 2H), 7.36 (td,  $J = 14.7, 7.1$  Hz, 5H), 7.22 (d,  $J = 7.9$  Hz, 2H), 3.90 (s, 2H);  $^{13}\text{C}$  NMR (100 MHz,  $\text{DMSO-}d_6$ )  $\delta$  153.33, 150.96, 143.62, 134.50, 134.38, 131.57, 131.03, 130.08, 129.54, 129.45, 129.32, 128.10, 125.35, 122.07, 32.66. HRMS (ESI) calcd for  $(\text{C}_{16}\text{H}_{13}\text{BrNOS})^+ [\text{M} + \text{H}]^+$  345.9896, found 345.9905.

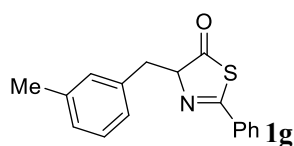

4-(3-methylbenzyl)-2-phenylthiazol-5(4H)-one (**1g**): light yellow solid, 1.27 g, 99% yield;  $^1\text{H}$  NMR (400 MHz,  $\text{DMSO-}d_6$ )  $\delta$  11.15 (s, 1H), 7.68 (d,  $J = 7.3$  Hz, 2H), 7.32 (dt,  $J = 24.7, 7.1$  Hz, 3H), 7.11 (t,  $J = 7.4$  Hz, 1H), 7.04 (d,  $J = 8.3$  Hz, 2H), 6.93 (d,  $J = 7.3$  Hz, 1H), 3.87 (s, 2H), 2.21 (s, 3H);  $^{13}\text{C}$  NMR (100 MHz,  $\text{DMSO-}d_6$ )  $\delta$  153.21, 150.48, 140.77, 137.73, 135.33, 134.55, 129.59, 129.48, 129.26, 128.67, 127.00, 126.08, 125.31, 33.14, 21.59. HRMS (ESI) calcd for  $(\text{C}_{17}\text{H}_{16}\text{NOS})^+ [\text{M} + \text{H}]^+$  282.0947, found 282.0958.

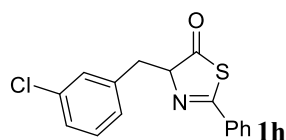



methyl 2-(3-methoxyphenyl)-2-nitroacetate (**1h**): light yellow solid, 1.36 g, 99% yield;  $^1\text{H}$  NMR (400 MHz, DMSO- $d_6$ )  $\delta$  11.11 (s, 1H), 7.68 (d,  $J = 7.3$  Hz, 2H), 7.40 – 7.30 (m, 3H), 7.27 (t,  $J = 7.6$  Hz, 2H), 7.20 (d,  $J = 7.3$  Hz, 2H), 3.92 (s, 2H);  $^{13}\text{C}$  NMR (100 MHz, DMSO- $d_6$ )  $\delta$  153.38, 150.93, 143.33, 134.39, 133.39, 130.67, 129.52, 129.42, 128.69, 127.70, 126.42, 125.36, 32.72. HRMS (ESI) calcd for  $(\text{C}_{16}\text{H}_{13}\text{ClNOS})^+ [\text{M} + \text{H}]^+$  302.0401, found 302.0410.

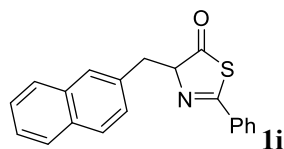

4-(naphthalen-2-ylmethyl)-2-phenylthiazol-5(4H)-one (**1i**): light yellow solid, 1.43 g, 99% yield;  $^1\text{H}$  NMR (400 MHz, DMSO- $d_6$ )  $\delta$  7.84 – 7.76 (m, 3H), 7.74 – 7.64 (m, 3H), 7.42 (dd,  $J = 14.6, 7.3$  Hz, 3H), 7.32 (dt,  $J = 23.2, 7.3$  Hz, 3H), 4.07 (s, 2H);  $^{13}\text{C}$  NMR (100 MHz, DMSO- $d_6$ )  $\delta$  153.33, 150.67, 138.51, 135.14, 134.49, 133.62, 132.12, 129.50, 129.32, 128.27, 127.97, 127.89, 126.77, 126.54, 125.82, 125.32, 33.41. HRMS (ESI) calcd for  $(\text{C}_{20}\text{H}_{16}\text{NOS})^+ [\text{M} + \text{H}]^+$  318.0947, found 318.0960.

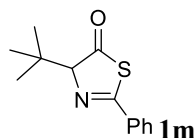

4-(tert-butyl)-2-phenylthiazol-5(4H)-one (**1m**): light yellow liquid, 0.74 g, 70% yield;  $^1\text{H}$  NMR (400 MHz,  $\text{CDCl}_3$ )  $\delta$  7.83 (d,  $J = 7.7$  Hz, 2H), 7.48 (ddd,  $J = 14.3, 10.1, 6.0$  Hz, 3H), 4.49 (s, 1H), 1.15 (s, 9H);  $^{13}\text{C}$  NMR (100 MHz,  $\text{CDCl}_3$ )  $\delta$  208.46, 164.28, 133.78, 131.98, 128.88, 128.14, 91.48, 38.17, 26.99. HRMS (ESI) calcd for  $(\text{C}_{13}\text{H}_{16}\text{NOS})^+ [\text{M} + \text{H}]^+$  234.0947, found 234.0942.

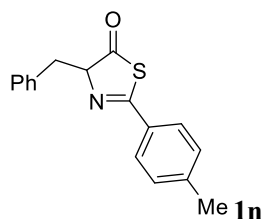

4-benzyl-2-(p-tolyl)thiazol-5(4H)-one (**1n**): light yellow solid, 1.27 g, 99% yield;  $^1\text{H}$  NMR (400 MHz, DMSO- $d_6$ )  $\delta$  7.60 – 7.51 (m, 2H), 7.22 (d,  $J = 3.3$  Hz, 4H), 7.17 (d,  $J = 5.9$  Hz, 2H), 7.14 – 7.08 (m, 1H), 3.87 (s, 2H), 2.27 (s, 3H);  $^{13}\text{C}$  NMR (100 MHz, DMSO- $d_6$ )  $\delta$  152.41, 151.01, 140.84, 138.96, 135.12, 131.90, 130.04, 128.94, 128.78, 126.35, 125.29, 33.14, 21.36. HRMS (ESI) calcd for  $(\text{C}_{17}\text{H}_{16}\text{NOS})^+ [\text{M} + \text{H}]^+$  282.0947, found 282.0951.

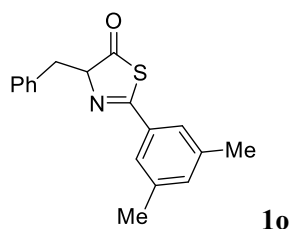

4-benzyl-2-(3,5-dimethylphenyl)thiazol-5(4H)-one (**1o**): according to general procedure: light

yellow solid, 1.33 g, 99% yield;  $^1\text{H}$  NMR (400 MHz,  $\text{DMSO-}d_6$ )  $\delta$  10.80 (d,  $J = 144.1$  Hz, 1H), 7.29 (s, 2H), 7.25 – 7.19 (m, 4H), 7.13 (td,  $J = 5.9, 2.8$  Hz, 1H), 6.94 (s, 1H), 3.89 (s, 2H), 2.24 (s, 6H);  $^{13}\text{C}$  NMR (100 MHz,  $\text{DMSO-}d_6$ )  $\delta$  152.75, 151.02, 140.86, 138.61, 135.15, 134.43, 130.87, 128.91, 128.78, 126.34, 123.07, 33.14, 21.32. HRMS (ESI) calcd for  $(\text{C}_{18}\text{H}_{18}\text{NOS})^+ [\text{M} + \text{H}]^+$  296.1104, found 296.1107.

### Single crystal X-Ray analysis of chiral 4ah

The crystal was developed from the solution of **4ah** in dichloromethane. CCDC 2072377 contains the supplementary crystallographic data for this paper. The absolute stereochemistry of **4ah** was determined unambiguously to be *R* with a flack parameter is 0.064(5). These data can be obtained free of charge from The Cambridge Crystallographic Data Centre via [www.ccdc.cam.ac.uk/data\\_request/cif](http://www.ccdc.cam.ac.uk/data_request/cif).

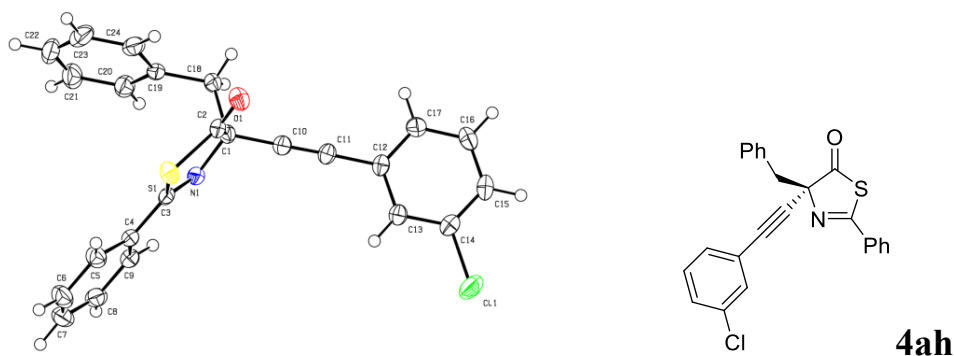

### Preparation of the phase transfer catalysts:

Known catalysts **A**<sup>[6]</sup>, **B**<sup>[6]</sup>, **C**<sup>[7]</sup>, **D**<sup>[6]</sup>, **E**<sup>[13]</sup>, **F**<sup>[8]</sup>, **G**<sup>[13]</sup>, **M**<sup>[9]</sup>, **N**<sup>[10]</sup> and **O**<sup>[11]</sup> were prepared by literature procedures. The corresponding new catalysts were prepared according to literature procedures<sup>[12]</sup> [13] [14]

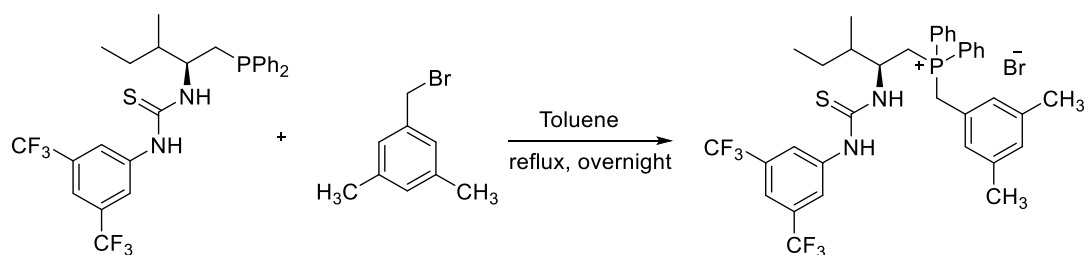

In a sealed tube, the corresponding amino acid-derived bifunctional phosphine (1.0 equiv) was dissolved in anhydrous toluene under  $\text{N}_2$ , then the corresponding benzylic halide (1.2 equiv) was added, and the resulting mixture was refluxed at  $120\text{ }^\circ\text{C}$  for 8 h to 12 h. After complete conversion of the starting material, which was monitored by TLC, the mixture was allowed to cool to ambient temperature and concentrated under reduced pressure. After evaporation of the solvent, the resulting mixture was purified by flash column chromatography to afford the desired phase transfer catalyst ( $\text{CH}_2\text{Cl}_2 : \text{MeOH} = 100:1$ ).

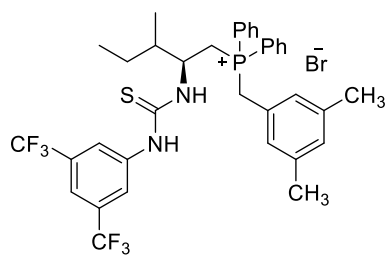

((2S)-2-(3-(3,5-bis(trifluoromethyl)phenyl)thioureido)-3-methylpentyl)(3,5-dimethylbenzyl)diphenylphosphonium bromide (**H**): white solid, 75% yield;  $^1\text{H}$  NMR (400 MHz,  $\text{CDCl}_3$ )  $\delta$  9.71 (d,  $J = 11.5$  Hz, 2H), 8.05 (s, 2H), 7.89 – 7.70 (m, 3H), 7.67 – 7.54 (m, 5H), 7.53 – 7.44 (m, 3H), 6.90 (s, 1H), 6.44 (s, 2H), 5.41 – 5.11 (m, 1H), 4.78 (t,  $J = 14.6$  Hz, 1H), 4.31 (t,  $J = 14.8$  Hz, 1H), 3.43 (dd,  $J = 26.5, 11.5$  Hz, 1H), 2.55 (t,  $J = 14.1$  Hz, 1H), 2.12 (s, 6H), 1.76 (d,  $J = 29.7$  Hz, 1H), 1.49 – 1.33 (m, 1H), 1.29 – 1.12 (m, 1H), 1.01 (d,  $J = 6.8$  Hz, 3H), 0.85 (t,  $J = 7.3$  Hz, 3H);  $^{13}\text{C}$  NMR (100 MHz,  $\text{CDCl}_3$ )  $\delta$  180.39, 140.67, 139.12 (d,  $J_{\text{C-P}}=3.2$  Hz), 135.10, 134.68, 133.60 (d,  $J_{\text{C-P}}=9.4$  Hz), 133.19 (d,  $J_{\text{C-P}}=8.9$  Hz), 131.18 (q,  $J_{\text{C-F}}=33.4$  Hz), 130.37, 130.64, 130.16 (d,  $J_{\text{C-P}}=4.1$  Hz), 130.03 (d,  $J_{\text{C-P}}=3.9$  Hz), 128.23 (d,  $J_{\text{C-P}}=5.6$  Hz), 125.92 (d,  $J_{\text{C-P}}=8.5$  Hz), 123.33 (q,  $J_{\text{C-F}}=273$  Hz), 122.65, 119.06 (d,  $J_{\text{C-P}}=83.1$  Hz), 117.30, 116.48, 51.66, 41.09 (d,  $J_{\text{C-P}}=12.1$ Hz), 29.07 (d,  $J_{\text{C-P}}=45.1$  Hz), 25.58, 24.22 (d,  $J_{\text{C-P}}=52.5$  Hz), 21.15, 14.95, 11.57. HRMS (ESI) calcd for  $(\text{C}_{36}\text{H}_{38}\text{F}_6\text{N}_2\text{PS})^+ [\text{M} - \text{Br}]^+$  675.2392, found 675.2200;  $[\alpha]_{\text{D}}^{20}$  -73.4 ( $c$  0.5,  $\text{CHCl}_3$ ).

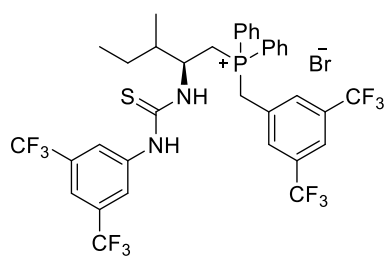

(3,5-bis(trifluoromethyl)benzyl)((2S)-2-(3-(3,5-bis(trifluoromethyl)phenyl)thioureido)-3-methylpentyl)diphenylphosphonium bromide (**I**): white solid, 65% yield;  $^1\text{H}$  NMR (400 MHz,  $\text{CDCl}_3$ )  $\delta$  9.82 (d,  $J = 9.1$  Hz, 1H), 9.74 (s, 1H), 8.15 (s, 2H), 7.87 (dt,  $J = 7.0, 3.5$  Hz, 1H), 7.82 – 7.79 (m, 1H), 7.77 – 7.69 (m, 7H), 7.61 (td,  $J = 7.6, 3.7$  Hz, 2H), 7.55 (s, 1H), 7.25 (s, 2H), 5.32 – 5.07 (m, 2H), 4.87 (t,  $J = 14.6$  Hz, 1H), 3.98 (dd,  $J = 26.5, 11.4$  Hz, 1H), 2.58 – 2.43 (m, 1H), 1.84 (s, 1H), 1.23 – 1.12 (m, 2H), 1.01 (d,  $J = 6.8$  Hz, 3H), 0.74 (t,  $J = 7.4$  Hz, 3H);  $^{13}\text{C}$  NMR (100 MHz,  $\text{CDCl}_3$ )  $\delta$  180.31, 140.62, 135.76 (q,  $J_{\text{C-F}}=35.3$  Hz), 133.41 (d,  $J_{\text{C-P}}=9.4$  Hz), 133.12, 132.71, 132.40, 132.22, 132.12, 132.04, 131.44 (q,  $J_{\text{C-F}}=33.3$  Hz), 130.84, 130.72, 130.62, 130.49, 130.29 (d,  $J_{\text{C-P}}=8.7$  Hz), 128.59 (d,  $J_{\text{C-P}}=12.0$  Hz), 123.27 (q,  $J_{\text{C-F}}=269$  Hz), 122.41 (q,  $J_{\text{C-F}}=277$  Hz), 122.66, 117.63, 116.38 (d,  $J_{\text{C-P}}=28.1$  Hz), 115.55 (d,  $J_{\text{C-P}}=29.6$  Hz), 112.68, 51.59, 40.74 (d,  $J_{\text{C-P}}=12.0$  Hz), 29.79, 28.62 (d,  $J_{\text{C-P}}=44.9$  Hz), 25.74, 25.32 (d,  $J_{\text{C-P}}=50.6$  Hz), 14.60, 11.37. HRMS (ESI) calcd for  $(\text{C}_{36}\text{H}_{32}\text{F}_{12}\text{N}_2\text{PS})^+ [\text{M} - \text{Br}]^+$  783.1827, found 783.1821;  $[\alpha]_{\text{D}}^{20}$  -24.4 ( $c$  0.5,  $\text{CHCl}_3$ ).

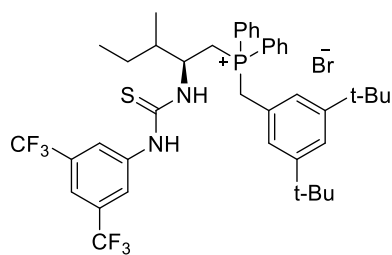

**J**

((2S)-2-(3-(3,5-bis(trifluoromethyl)phenyl)thioureido)-3-methylpentyl)(3,5-di-tert-butylbenzyl)diphenylphosphonium bromide (**J**): white solid, 70% yield;  $^1\text{H}$  NMR (400 MHz,  $\text{CDCl}_3$ )  $\delta$  9.72 (s, 1H), 9.62 (d,  $J = 9.3$  Hz, 1H), 8.07 (s, 2H), 7.76 (dd,  $J = 12.3, 7.3$  Hz, 3H), 7.63 – 7.49 (m, 8H), 7.30 (s, 1H), 6.74 (s, 2H), 5.24 (d,  $J = 12.2$  Hz, 1H), 4.81 (t,  $J = 14.5$  Hz, 1H), 4.45 (t,  $J = 14.8$  Hz, 1H), 3.57 (dd,  $J = 26.5, 11.7$  Hz, 1H), 2.54 (t,  $J = 14.3$  Hz, 1H), 1.78 (s, 1H), 1.37 (dt,  $J = 18.1, 10.2$  Hz, 2H), 1.12 (s, 18H), 0.99 (d,  $J = 6.7$  Hz, 3H), 0.82 (t,  $J = 7.3$  Hz, 3H);  $^{13}\text{C}$  NMR (100 MHz,  $\text{CDCl}_3$ )  $\delta$  180.51, 152.21, 140.70, 134.83 (d,  $J_{\text{C-P}} = 30.1$  Hz), 133.34 (d,  $J_{\text{C-P}} = 21$  Hz), 133.33 (d,  $J_{\text{C-P}} = 4$  Hz), 131.19 (q,  $J_{\text{C-F}} = 33.3$  Hz), 130.29 (d,  $J_{\text{C-P}} = 3.3$  Hz), 130.17 (d,  $J_{\text{C-P}} = 3.6$  Hz), 125.53 (d,  $J_{\text{C-P}} = 8.3$  Hz), 124.62 (d,  $J_{\text{C-P}} = 5.6$  Hz), 123.36 (q,  $J_{\text{C-F}} = 271.6$  Hz), 123.07, 122.69, 119.46, 118.64, 117.71, 117.30, 116.88, 51.78, 41.08 (d,  $J_{\text{C-P}} = 12.1$  Hz), 34.84, 29.64 (d,  $J_{\text{C-P}} = 45.4$  Hz), 25.30, 24.54 (d,  $J_{\text{C-P}} = 52.2$  Hz), 14.96, 11.69. HRMS (ESI) calcd for  $(\text{C}_{42}\text{H}_{50}\text{F}_6\text{N}_2\text{PS})^+ [\text{M} - \text{Br}]^+$  759.3331, found 759.3321;  $[\alpha]_{\text{D}}^{20} -48.6$  (c 0.5,  $\text{CHCl}_3$ ).

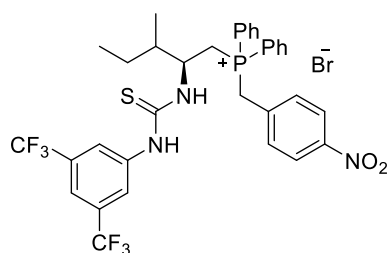

**K**

((2S)-2-(3-(3,5-bis(trifluoromethyl)phenyl)thioureido)-3-methylpentyl)(4-nitrobenzyl)diphenylphosphonium bromide (**K**): white solid, 61% yield;  $^1\text{H}$  NMR (400 MHz,  $\text{CDCl}_3$ )  $\delta$  9.91 (s, 1H), 9.60 (d,  $J = 9.3$  Hz, 1H), 8.14 (s, 2H), 7.96 (d,  $J = 8.3$  Hz, 2H), 7.89 – 7.79 (m, 3H), 7.74 – 7.67 (m, 5H), 7.60 – 7.54 (m, 2H), 7.52 (s, 1H), 7.13 (dd,  $J = 8.8, 2.3$  Hz, 2H), 5.22 (t,  $J = 15.4$  Hz, 1H), 5.11 (dd,  $J = 12.1, 7.1$  Hz, 1H), 4.78 (t,  $J = 14.9$  Hz, 1H), 3.88 (dt,  $J = 15.2, 11.3$  Hz, 1H), 2.59 (t,  $J = 14.1$  Hz, 1H), 1.86 – 1.75 (m, 1H), 1.24 – 1.13 (m, 2H), 1.00 (d,  $J = 6.8$  Hz, 3H), 0.72 (t,  $J = 7.3$  Hz, 3H);  $^{13}\text{C}$  NMR (100 MHz,  $\text{CDCl}_3$ )  $\delta$  180.40, 147.86, 140.71, 135.77 (d,  $J_{\text{C-P}} = 6$  Hz), 135.43 (d,  $J_{\text{C-P}} = 6$  Hz), 135.01 (d,  $J_{\text{C-P}} = 8.7$  Hz), 133.62 (d,  $J_{\text{C-P}} = 9.4$  Hz), 133.43 (d,  $J_{\text{C-P}} = 9.2$  Hz), 132.19, 132.09, 131.54, 131.48, 131.38 (q,  $J_{\text{C-F}} = 33$  Hz), 130.69 (d,  $J_{\text{C-P}} = 12.3$  Hz), 130.41 (d,  $J_{\text{C-P}} = 12.4$  Hz), 128.62 (d,  $J_{\text{C-P}} = 12.2$  Hz), 124.18 (d,  $J_{\text{C-P}} = 2.6$  Hz), 123.26 (q,  $J_{\text{C-F}} = 272$  Hz), 122.63, 117.57, 116.84 (d,  $J_{\text{C-P}} = 12.9$  Hz), 116.01 (d,  $J_{\text{C-P}} = 14.5$  Hz), 51.57 (d,  $J_{\text{C-P}} = 4.3$  Hz), 40.75 (d,  $J_{\text{C-P}} = 12.0$  Hz), 28.64 (d,  $J_{\text{C-P}} = 44.8$  Hz), 25.73, 25.40 (d,  $J_{\text{C-P}} = 50.9$  Hz), 14.66, 11.45. HRMS (ESI) calcd for  $(\text{C}_{34}\text{H}_{33}\text{F}_6\text{N}_3\text{O}_2\text{PS})^+ [\text{M} - \text{Br}]^+$  692.1930, found 692.1977;  $[\alpha]_{\text{D}}^{20} -50.4$  (c 0.5,  $\text{CHCl}_3$ ).

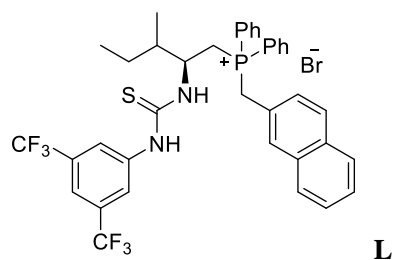

((2S)-2-(3-(3,5-bis(trifluoromethyl)phenyl)thioureido)-3-methylpentyl)(naphthalen-2-ylmethyl)diphenylphosphonium bromide (**L**): white solid, 68% yield;  $^1\text{H}$  NMR (400 MHz,  $\text{CDCl}_3$ )  $\delta$  9.85 (s, 1H), 9.64 (d,  $J = 9.4$  Hz, 1H), 8.08 (s, 2H), 7.82 – 7.70 (m, 4H), 7.64 – 7.54 (m, 7H), 7.54 – 7.48 (m, 3H), 7.48 – 7.42 (m, 2H), 7.40 (s, 1H), 6.89 (d,  $J = 8.4$  Hz, 1H), 5.40 – 5.21 (m, 1H), 4.97 (t,  $J = 14.7$  Hz, 1H), 4.74 (t,  $J = 14.9$  Hz, 1H), 3.58 – 3.39 (m, 1H), 2.59 (dd,  $J = 16.4, 12.0$  Hz, 1H), 1.79 (s, 1H), 1.42 – 1.28 (m, 1H), 1.25 – 1.11 (m, 1H), 0.97 (d,  $J = 6.8$  Hz, 3H), 0.78 (t,  $J = 7.3$  Hz, 3H);  $^{13}\text{C}$  NMR (100 MHz,  $\text{CDCl}_3$ )  $\delta$  180.45, 140.76, 135.02 (d,  $J_{\text{C-P}} = 48.0$  Hz), 133.51 (d,  $J_{\text{C-P}} = 9.3$  Hz), 133.30 (d,  $J_{\text{C-P}} = 9.1$  Hz), 133.10 (d,  $J_{\text{C-P}} = 2.9$  Hz), 132.87 (d,  $J_{\text{C-P}} = 2.0$  Hz), 131.17 (q,  $J_{\text{C-F}} = 33.3$  Hz), 130.33, 130.21, 130.11, 129.24, 127.72 (d,  $J_{\text{C-P}} = 21.4$  Hz), 127.12 (d,  $J_{\text{C-P}} = 4.3$  Hz), 123.35 (q,  $J_{\text{C-F}} = 271$  Hz), 123.77 (d,  $J_{\text{C-P}} = 8.7$  Hz), 122.60, 118.48 (d,  $J_{\text{C-P}} = 83.0$  Hz), 117.33, 117.25, 116.51, 51.70 (d,  $J_{\text{C-P}} = 4.3$  Hz), 41.01 (d,  $J_{\text{C-P}} = 12.1$  Hz), 29.49 (d,  $J_{\text{C-P}} = 45.3$  Hz), 25.54, 24.45 (d,  $J_{\text{C-P}} = 52.1$  Hz), 14.94, 11.54. HRMS (ESI) calcd for  $(\text{C}_{38}\text{H}_{36}\text{F}_6\text{N}_2\text{PS})^+ [\text{M} - \text{Br}]^+$  697.2236, found 697.2239;  $[\alpha]_{\text{D}}^{20}$  -80.8 ( $c$  0.5,  $\text{CHCl}_3$ ).

*References:*

- [1] J. Kikuchi, N. Momiyama, and M. Terada, *Org. Lett.* **2016**, *18*, 2521-2523.
- [2] P. Finkbeiner, N. Weckenmann, and B. Nachtsheim, *Org. Lett.* **2014**, *16*, 1326-1329.
- [3] Y. Lin, and K. Andersen, *Eur. J. Org. Chem.* **2002**, 557-563.
- [4] G. Barrett, and A. Khokhar, *J. Chem. Soc.*, **1969**.
- [5] I. Ko, S. Park, G. Lee, and H. Kim, *Arkivoc.* **2019**, *3*, 67-78.
- [6] X. Wu, Q. Liu, Y. Liu, Q. Wang, Y. Zhang, J. Chen, W. Cao, and G. Zhao, *Adv. Synth. Catal.* **2013**, *355*, 2701-2706.
- [7] L. Ge, X. Lu, C. Cheng, J. Chen, W. Cao, X. Wu, and G. Zhao, *J. Org. Chem.* **2016**, *81*, 9315-9325.
- [8] E. Yamamoto, K. Wakafuji, Y. Mori, G. Teshima, Y. Hidani, and M. Tokunaga, *Org. Lett.* **2019**, *21*, 4030-4034.
- [9] Y. Wu, Y. Jhong, H. Lin, S. Swain, H. Tsai, and D. Hou, *Adv. Synth. Catal.* **2019**, *361*, 4966-4982.
- [10] L. Qi, H. Hou, F. Ling and W. Zhong, *Org. Biomol. Chem.* **2018**, *16*, 566-574.
- [11] S. Wu, D. Pan, C. Cao, Q. Wang, and F. Chen, *Adv. Synth. Catal.* **2013**, *355*, 1917-1923.
- [12] Z. Dong, C. Yan, Y. Gao, C. Dong, G. Qiu, and H. Zhou, *Adv. Synth. Catal.* **2015**, *357*, 2132-2142.
- [13] H. Xiao, Z. Chai, C. Zheng, Y. Yang, W. Liu, J. Zhang, and G. Zhao, *Angew. Chem. Int. Ed.* **2010**, *49*, 4467-4470.
- [14] D. Cao, Z. Chai, J. Zhang, Z. Ye, H. Xiao, H. Wang, J. Chen, X. Wu and G. Zhao, *Chem. Commun.* **2013**, *49*, 5972--5974.

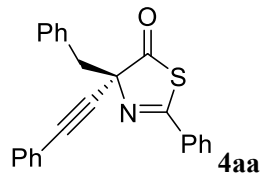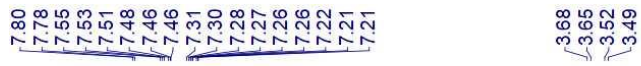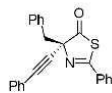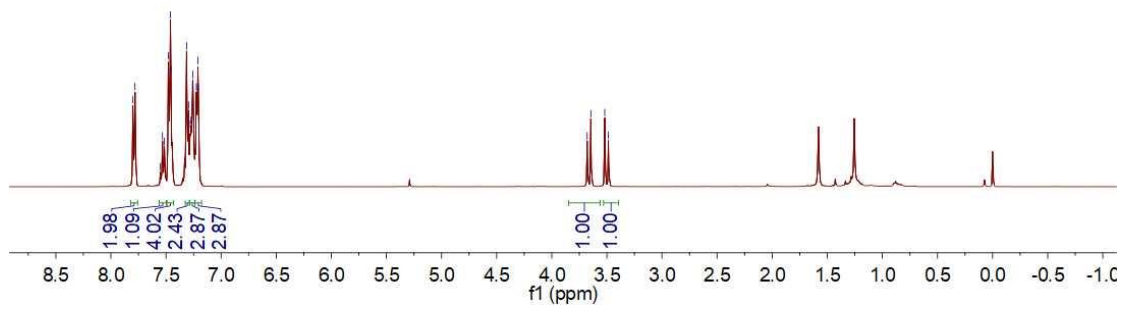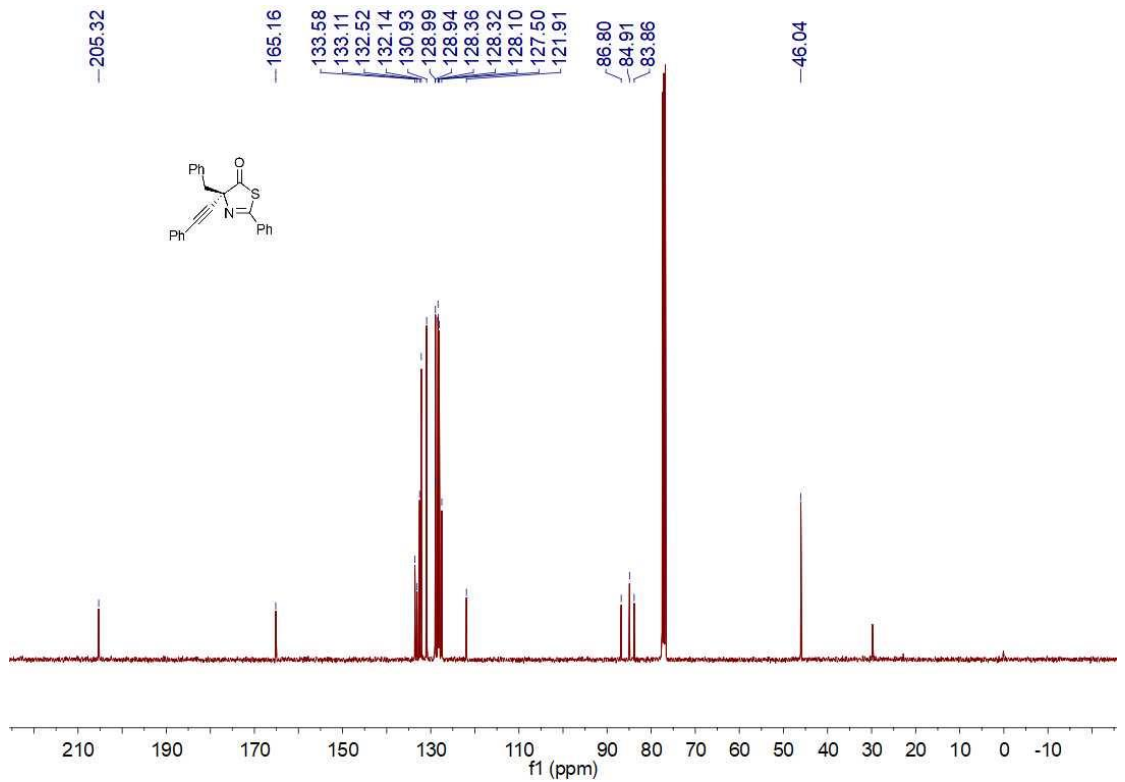

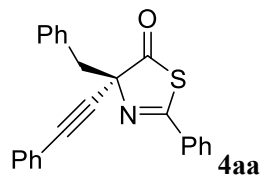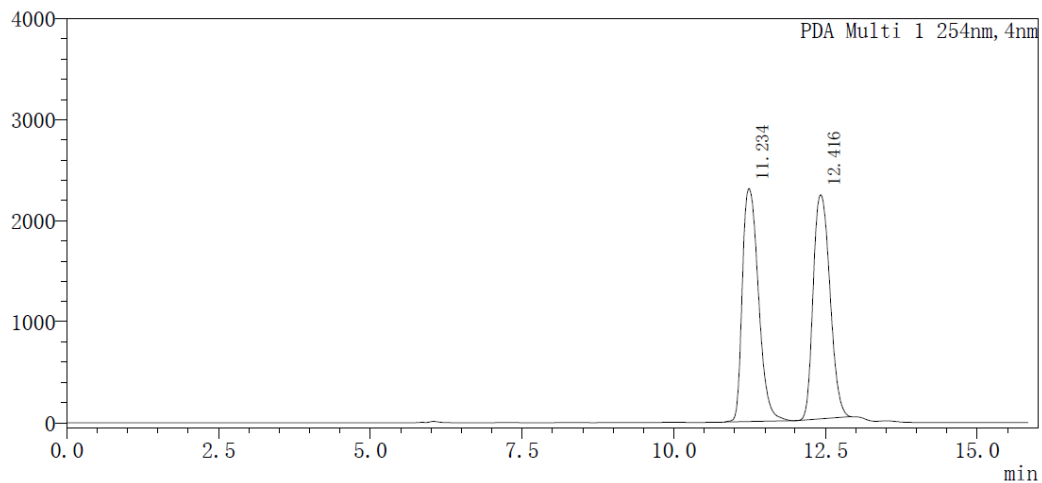

<Peak table>

PDA Ch1 254nm

| Peak# | Ret. Time | Height  | Area     | Area%   |
|-------|-----------|---------|----------|---------|
| 1     | 11.234    | 2305406 | 42712592 | 49.971  |
| 2     | 12.416    | 2218996 | 42761542 | 50.029  |
| Total |           | 4524401 | 85474134 | 100.000 |

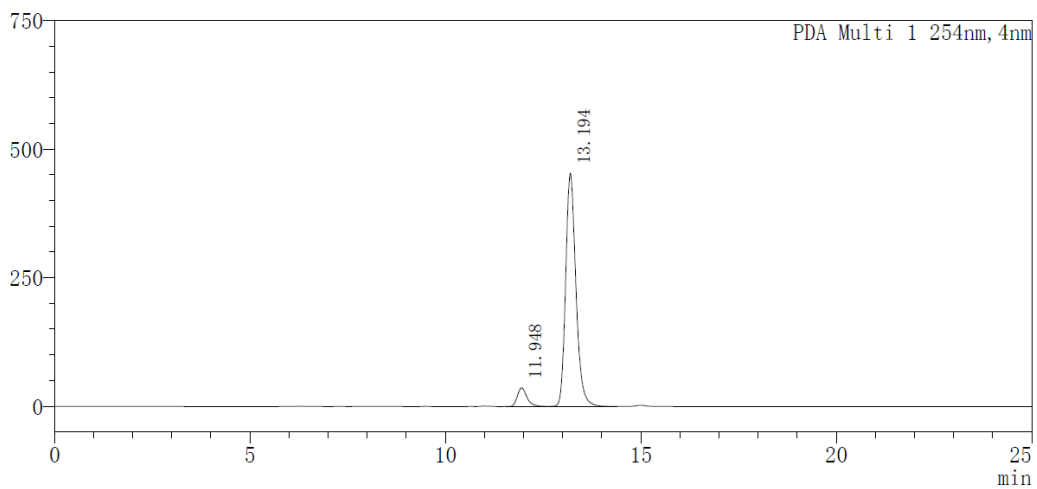

<Peak table>

PDA Ch1 254nm

| Peak# | Ret. Time | Height | Area    | Area%   |
|-------|-----------|--------|---------|---------|
| 1     | 11.948    | 36349  | 616770  | 6.937   |
| 2     | 13.194    | 452991 | 8274161 | 93.063  |
| Total |           | 489339 | 8890931 | 100.000 |



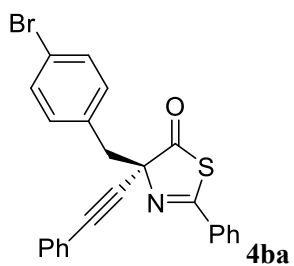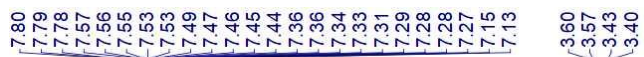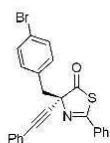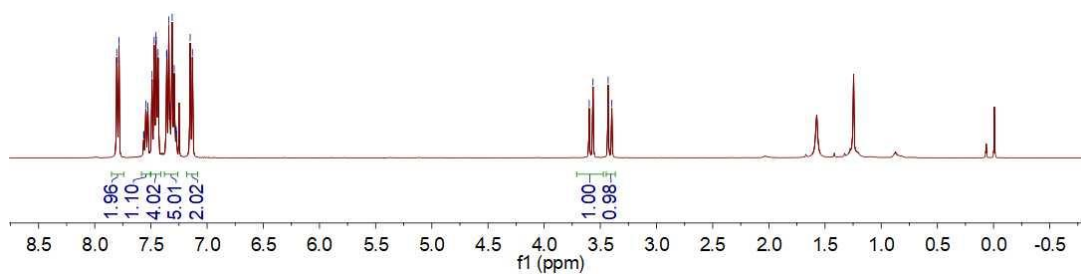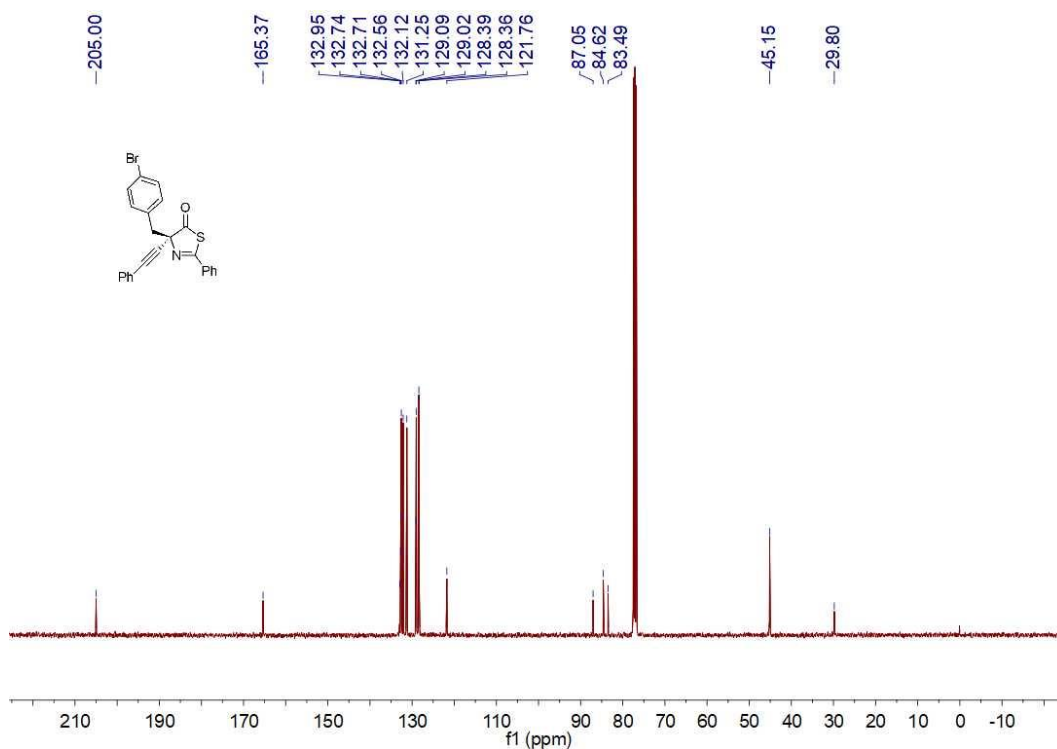

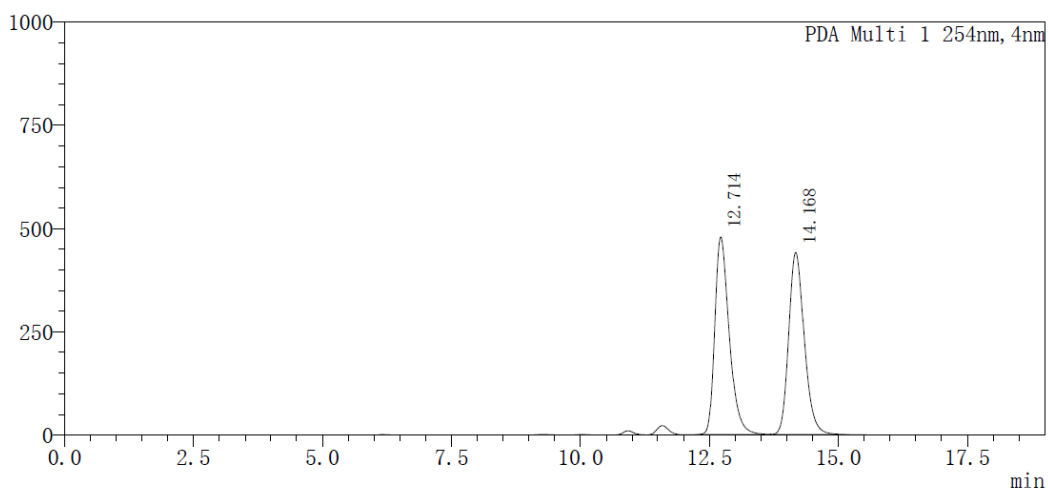

<Peak table>

PDA Ch1 254nm

| Peak# | Ret. Time | Height | Area     | Area%   |
|-------|-----------|--------|----------|---------|
| 1     | 12.714    | 478764 | 9375692  | 50.182  |
| 2     | 14.168    | 441162 | 9307623  | 49.818  |
| Total |           | 919926 | 18683316 | 100.000 |

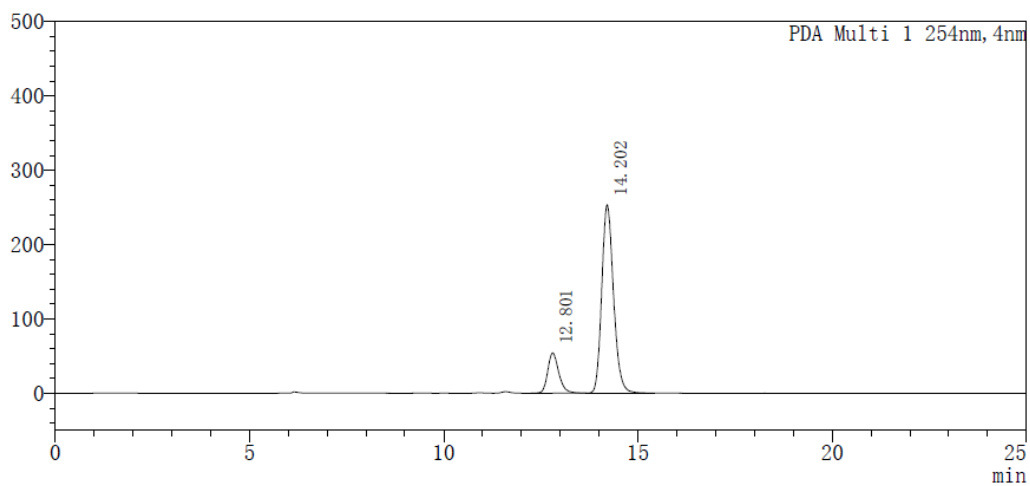

<Peak table>

PDA Ch1 254nm

| Peak# | Ret. Time | Height | Area    | Area%   |
|-------|-----------|--------|---------|---------|
| 1     | 12.801    | 54123  | 1075607 | 16.756  |
| 2     | 14.202    | 253485 | 5343624 | 83.244  |
| Total |           | 307608 | 6419231 | 100.000 |

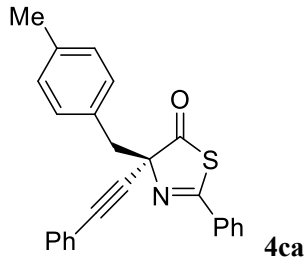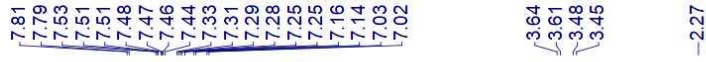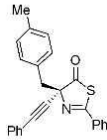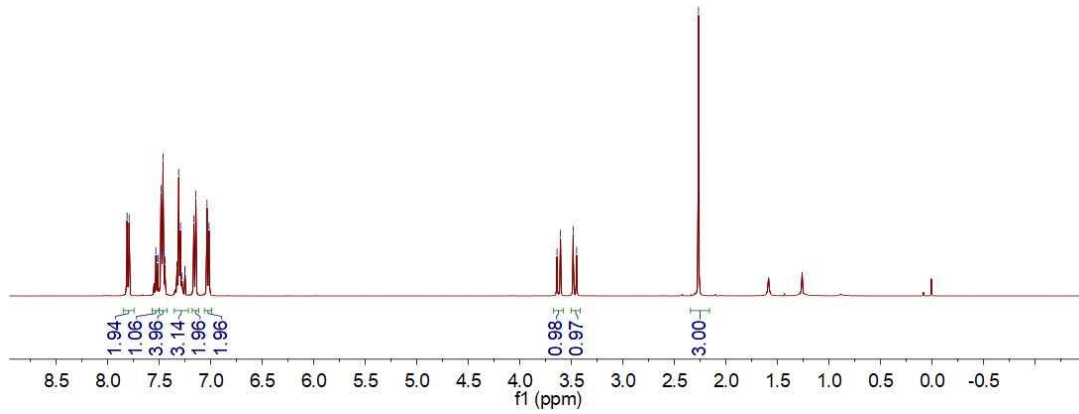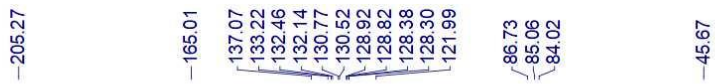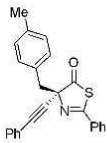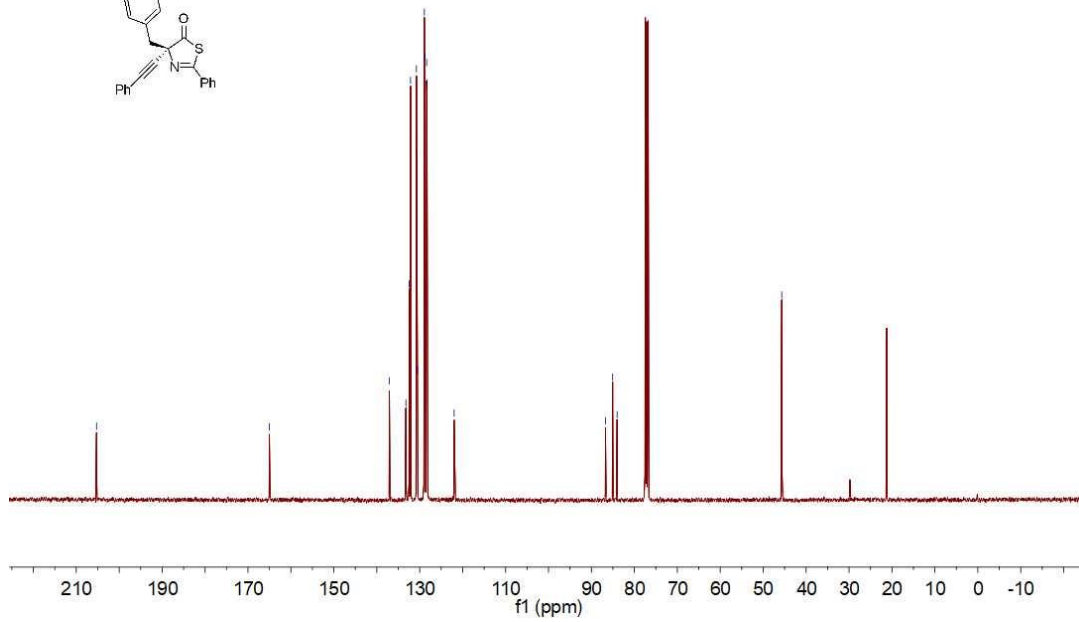

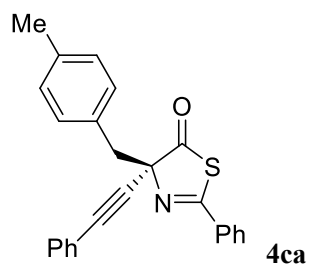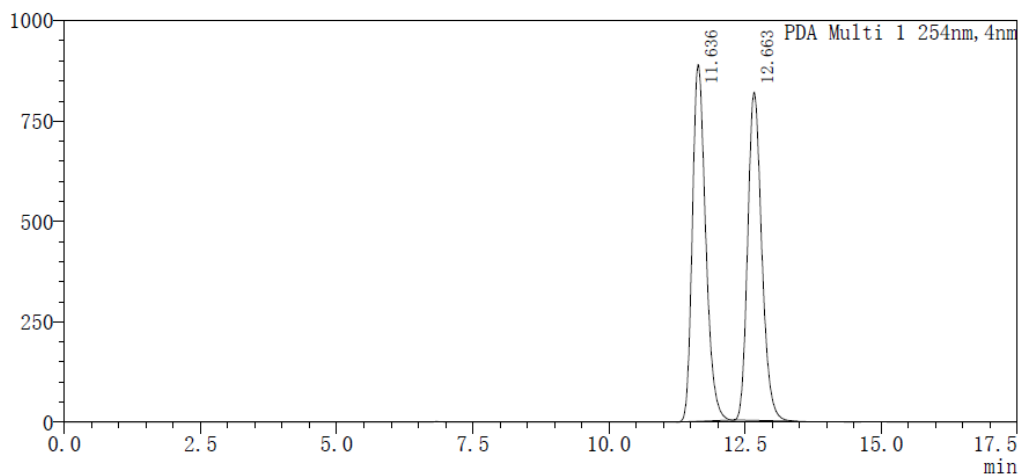

<Peak table>

PDA Ch1 254nm

| Peak# | Ret. Time | Height  | Area     | Area%   |
|-------|-----------|---------|----------|---------|
| 1     | 11.636    | 888454  | 15123210 | 50.681  |
| 2     | 12.663    | 817213  | 14716928 | 49.319  |
| Total |           | 1705667 | 29840139 | 100.000 |

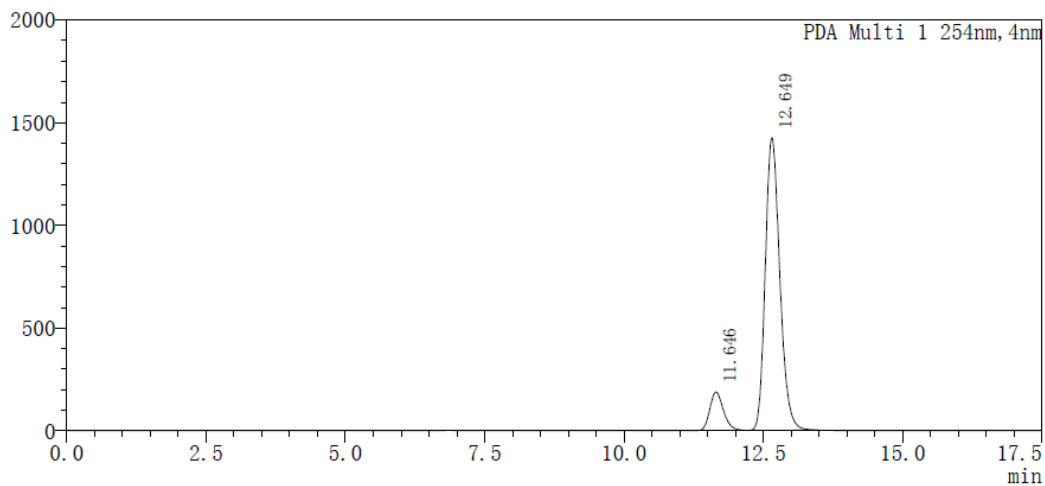

<Peak table>

PDA Ch1 254nm

| Peak# | Ret. Time | Height  | Area     | Area%   |
|-------|-----------|---------|----------|---------|
| 1     | 11.646    | 186996  | 3158626  | 10.869  |
| 2     | 12.649    | 1425085 | 25901141 | 89.131  |
| Total |           | 1612081 | 29059767 | 100.000 |

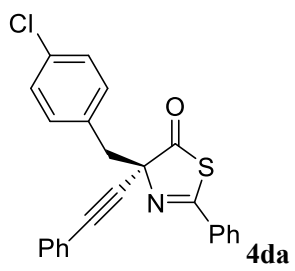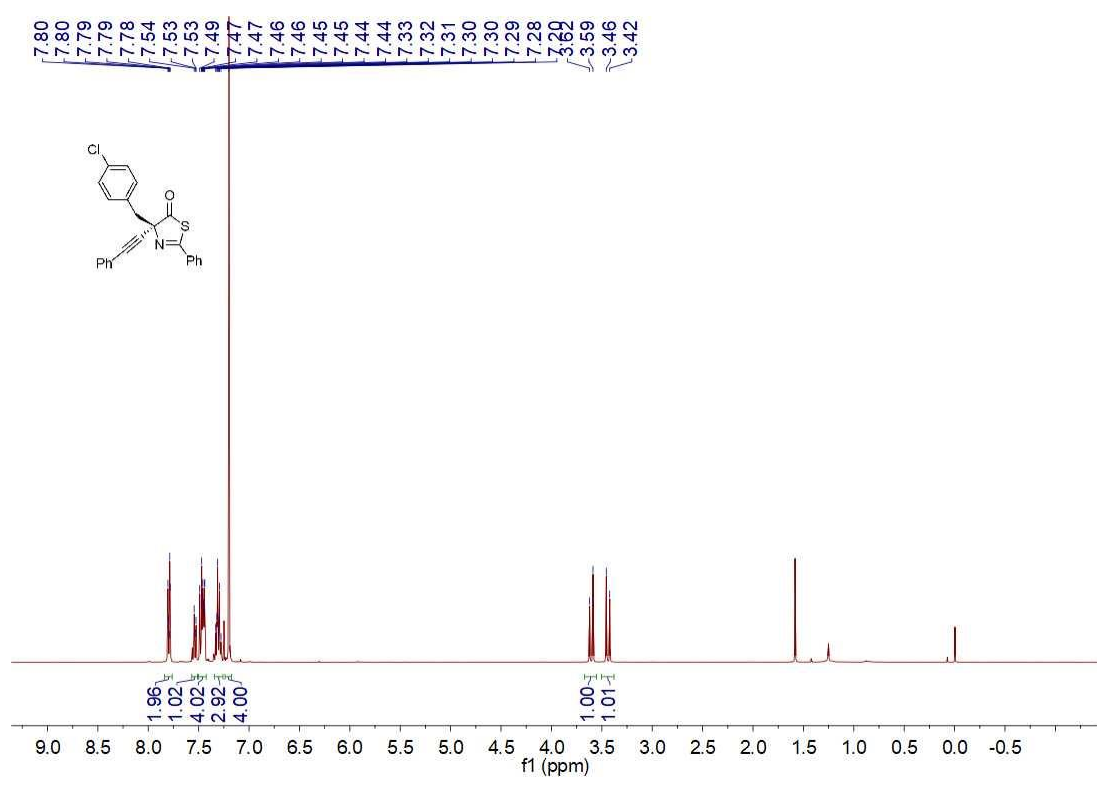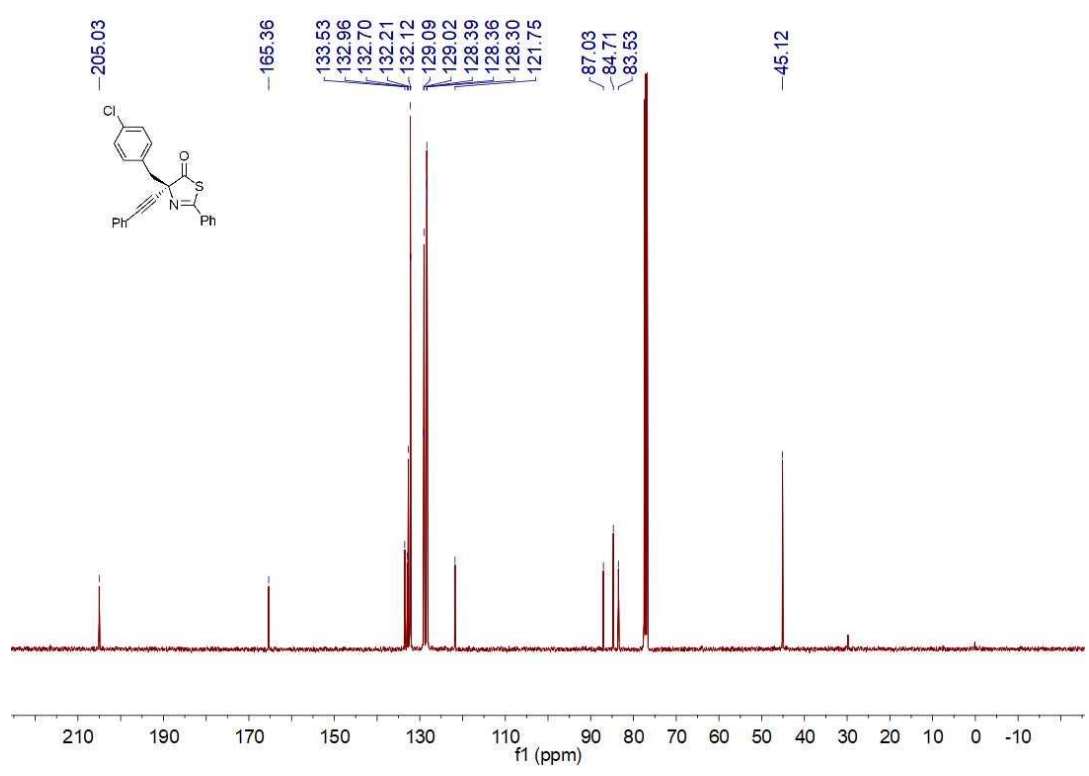

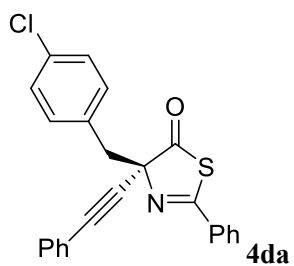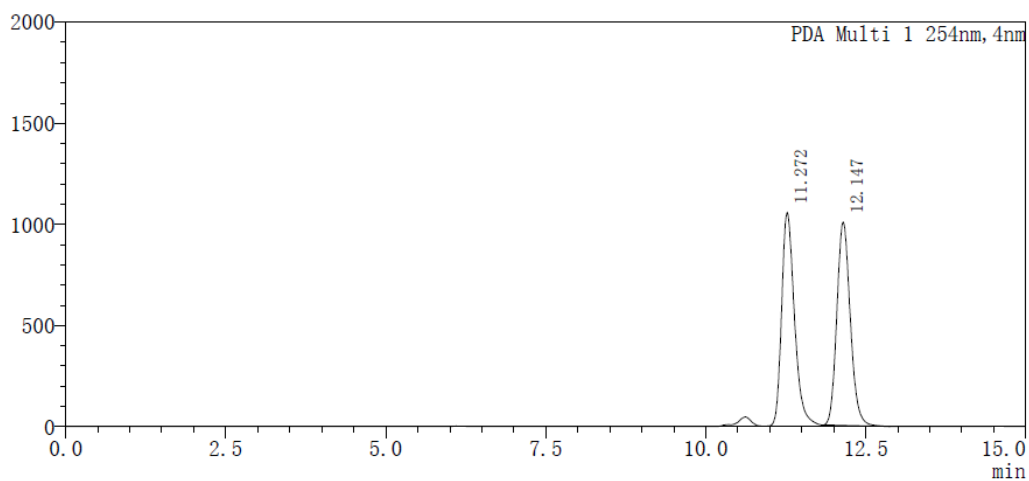

<Peak table>

PDA Ch1 254nm

| Peak# | Ret. Time | Height  | Area     | Area%   |
|-------|-----------|---------|----------|---------|
| 1     | 11.272    | 1058996 | 14951310 | 50.414  |
| 2     | 12.147    | 1005293 | 14705746 | 49.586  |
| Total |           | 2064289 | 29657055 | 100.000 |

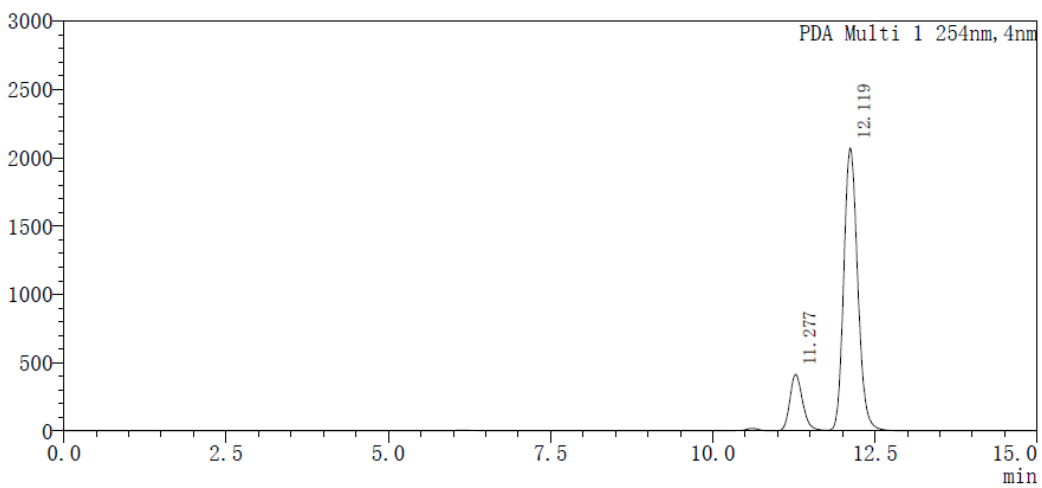

<Peak table>

PDA Ch1 254nm

| Peak# | Ret. Time | Height  | Area     | Area%   |
|-------|-----------|---------|----------|---------|
| 1     | 11.277    | 414324  | 5723317  | 15.645  |
| 2     | 12.119    | 2067843 | 30859824 | 84.355  |
| Total |           | 2482168 | 36583141 | 100.000 |

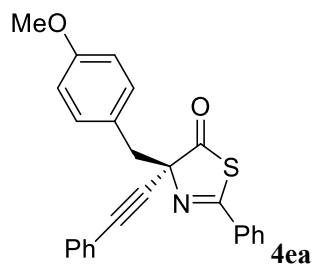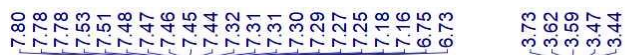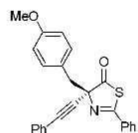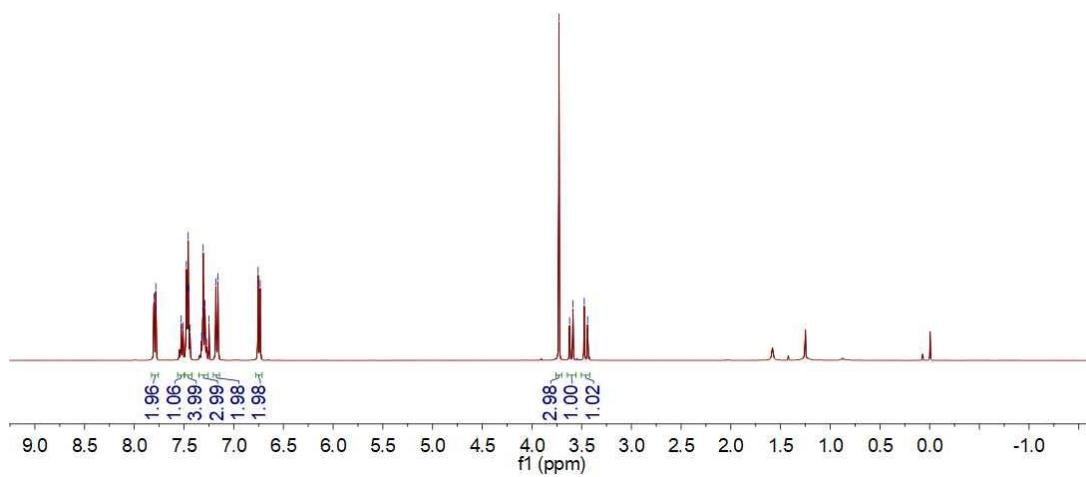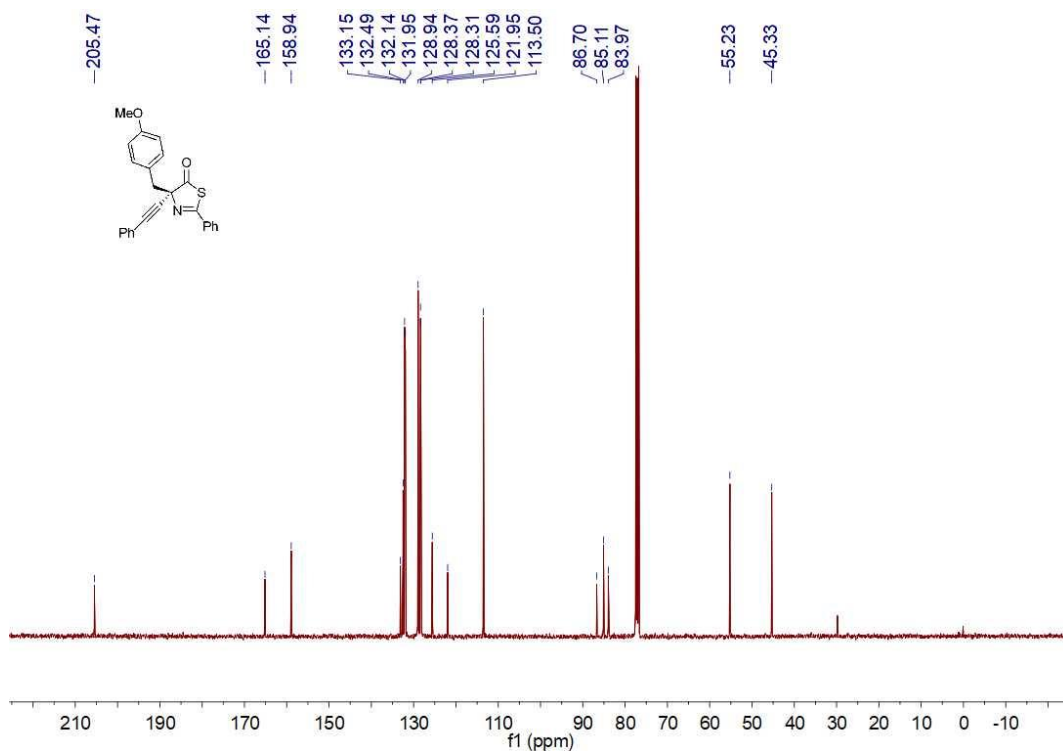

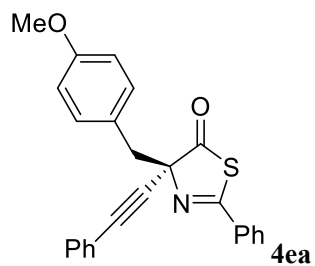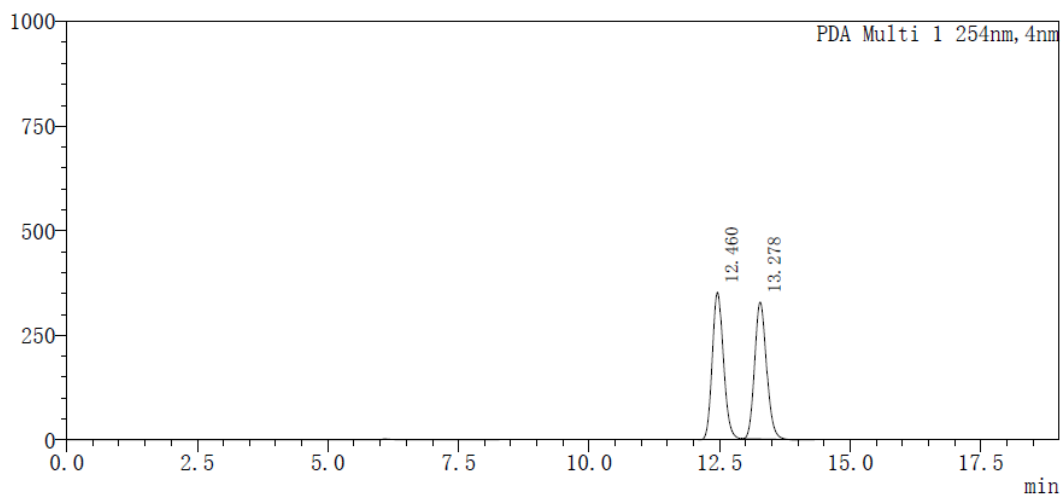

<Peak table>

PDA Ch1 254nm

| Peak# | Ret. Time | Height | Area     | Area%   |
|-------|-----------|--------|----------|---------|
| 1     | 12.460    | 353584 | 5331700  | 50.454  |
| 2     | 13.278    | 327631 | 5235815  | 49.546  |
| Total |           | 681215 | 10567514 | 100.000 |

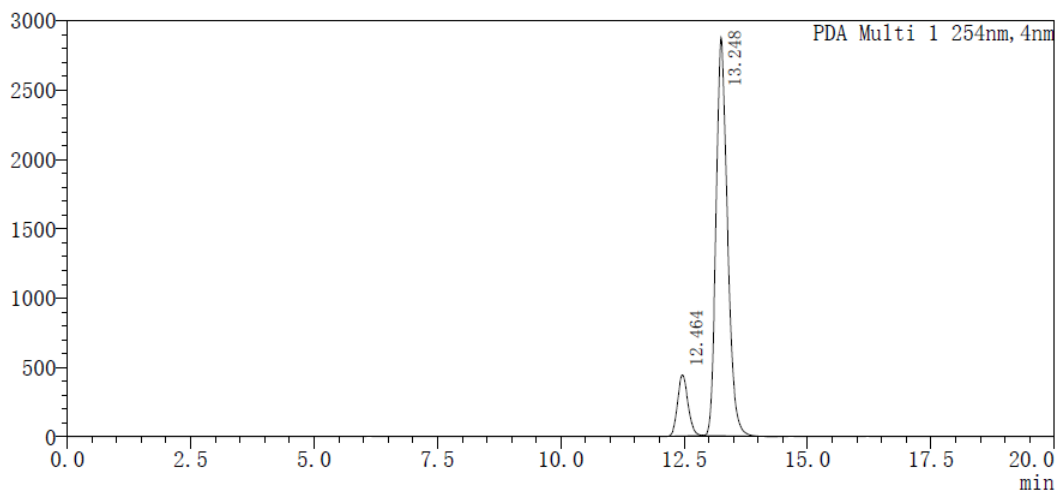

<Peak table>

PDA Ch1 254nm

| Peak# | Ret. Time | Height  | Area     | Area%   |
|-------|-----------|---------|----------|---------|
| 1     | 12.464    | 439990  | 6479290  | 12.275  |
| 2     | 13.248    | 2873977 | 46305283 | 87.725  |
| Total |           | 3313967 | 52784573 | 100.000 |



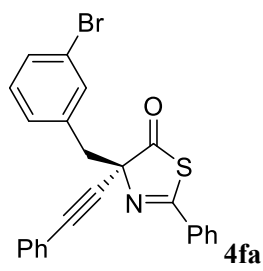

7.81  
7.79  
7.79  
7.56  
7.54  
7.53  
7.52  
7.49  
7.47  
7.47  
7.45  
7.45  
7.36  
7.34  
7.33  
7.32  
7.32  
7.31  
7.29  
7.28  
7.21  
7.19  
7.12  
7.10  
3.98  
3.56  
3.42  
3.39

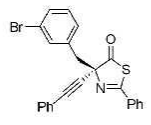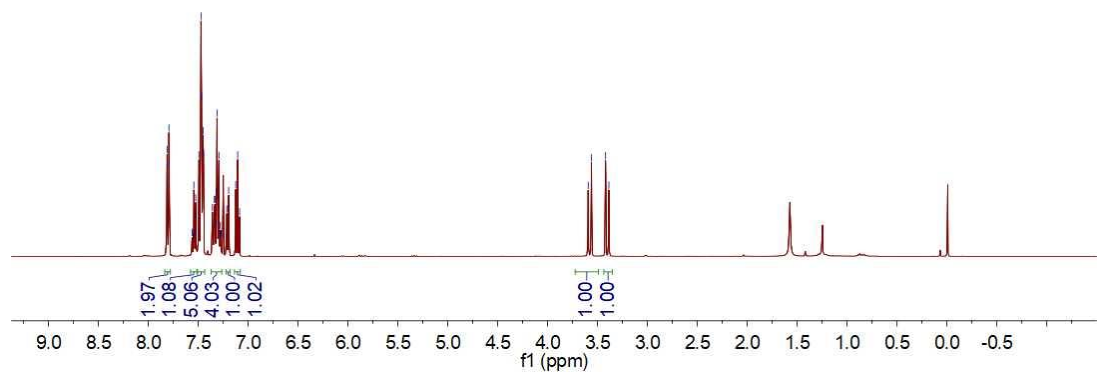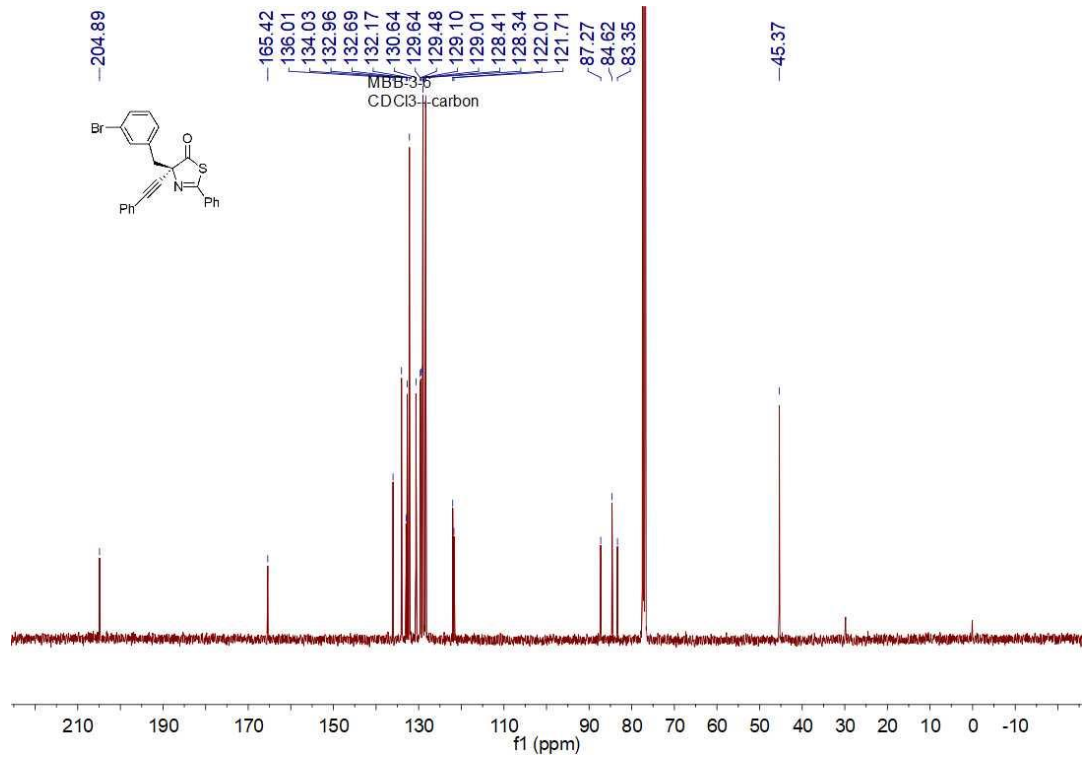

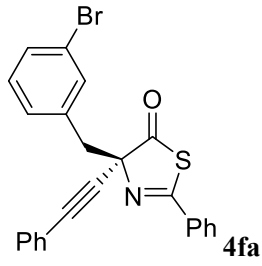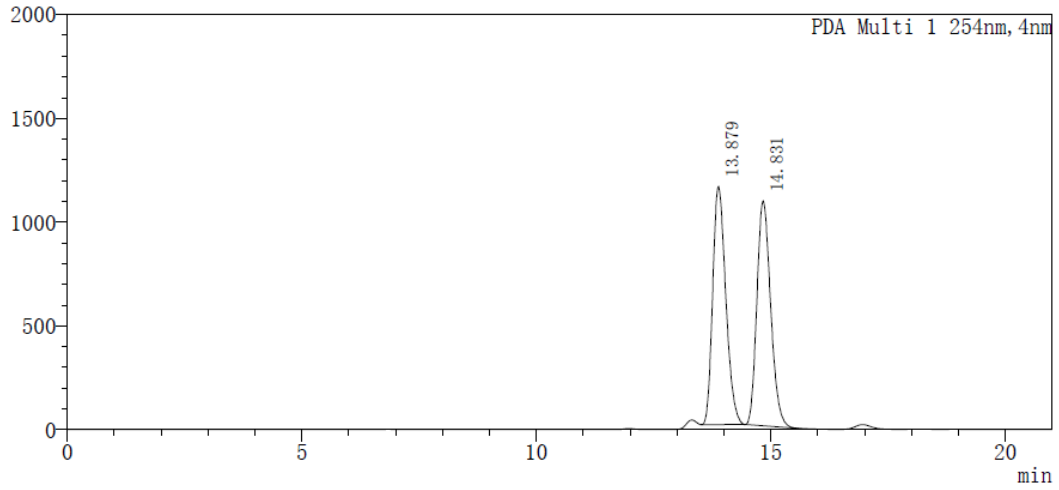

<Peak table>

PDA Ch1 254nm

| Peak# | Ret. Time | Height  | Area     | Area%   |
|-------|-----------|---------|----------|---------|
| 1     | 13.879    | 1147693 | 22264562 | 50.175  |
| 2     | 14.831    | 1083834 | 22109011 | 49.825  |
| Total |           | 2231527 | 44373573 | 100.000 |

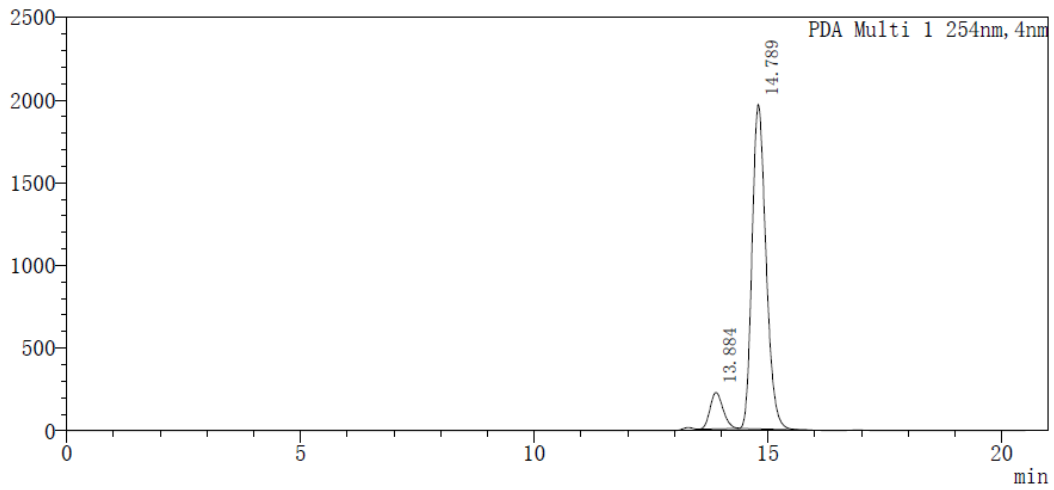

<Peak table>

PDA Ch1 254nm

| Peak# | Ret. Time | Height  | Area     | Area%   |
|-------|-----------|---------|----------|---------|
| 1     | 13.884    | 219604  | 4218937  | 9.406   |
| 2     | 14.789    | 1960565 | 40633022 | 90.594  |
| Total |           | 2180170 | 44851959 | 100.000 |

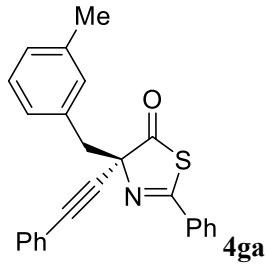

7.81  
7.80  
7.79  
7.79  
7.79  
7.54  
7.52  
7.52  
7.49  
7.49  
7.48  
7.47  
7.47  
7.45  
7.34  
7.33  
7.32  
7.32  
7.31  
7.30  
7.12  
7.10  
7.09  
7.08  
7.03  
7.01  
3.65  
3.62  
3.49  
3.46

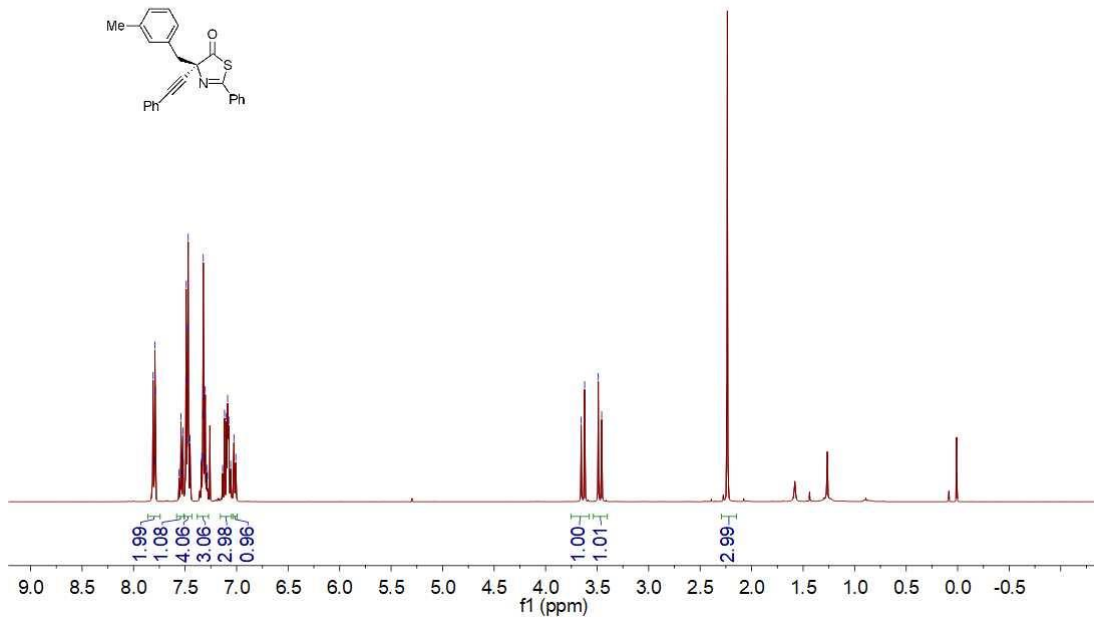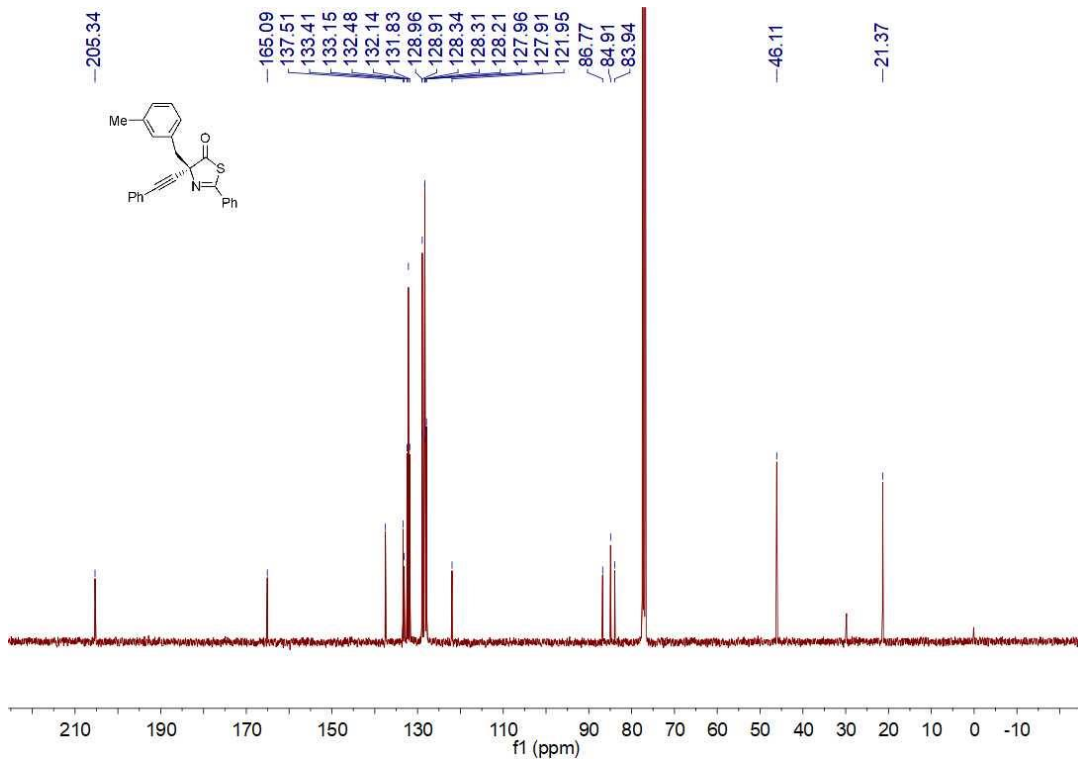

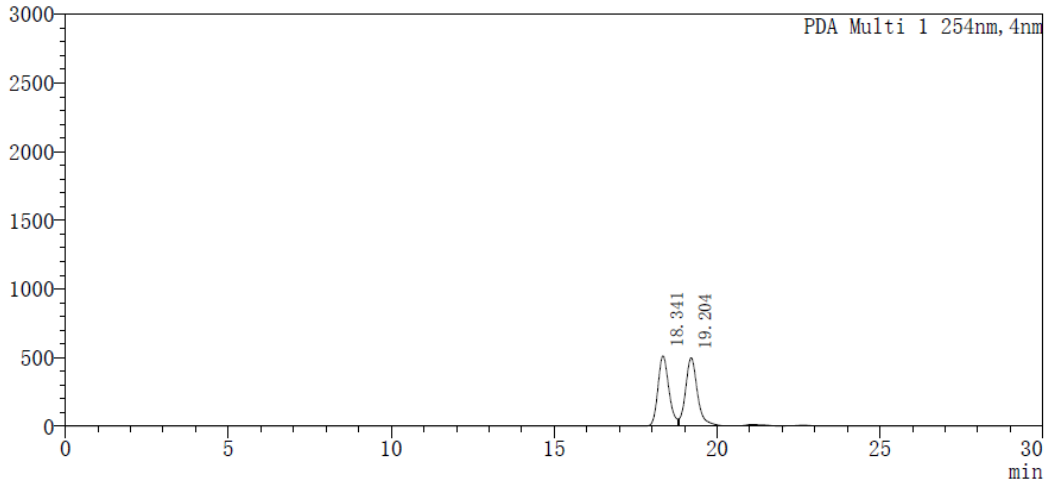

<Peak table>

PDA Ch1 254nm

| Peak# | Ret. Time | Height  | Area     | Area%   |
|-------|-----------|---------|----------|---------|
| 1     | 18.341    | 511498  | 11965303 | 48.426  |
| 2     | 19.204    | 498545  | 12743123 | 51.574  |
| Total |           | 1010044 | 24708426 | 100.000 |

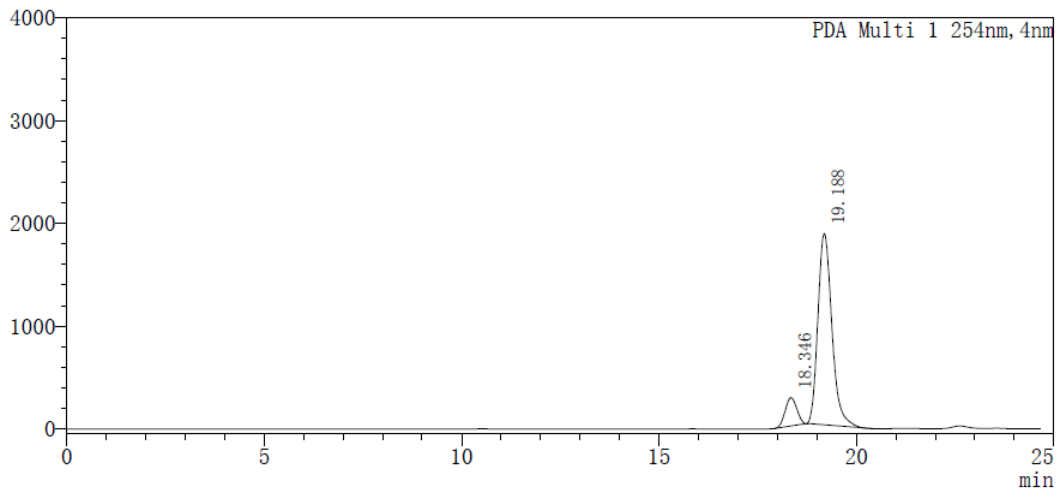

<Peak table>

PDA Ch1 254nm

| Peak# | Ret. Time | Height  | Area     | Area%   |
|-------|-----------|---------|----------|---------|
| 1     | 18.346    | 274690  | 5601694  | 10.883  |
| 2     | 19.188    | 1862131 | 45870741 | 89.117  |
| Total |           | 2136821 | 51472435 | 100.000 |

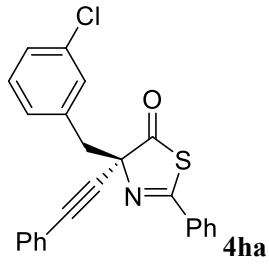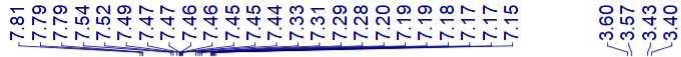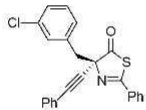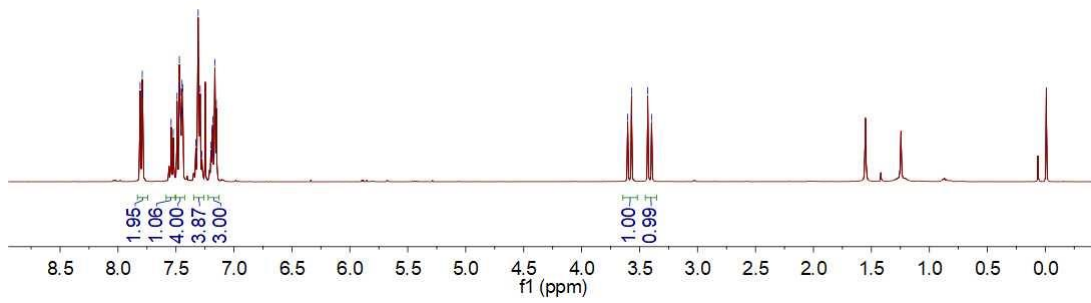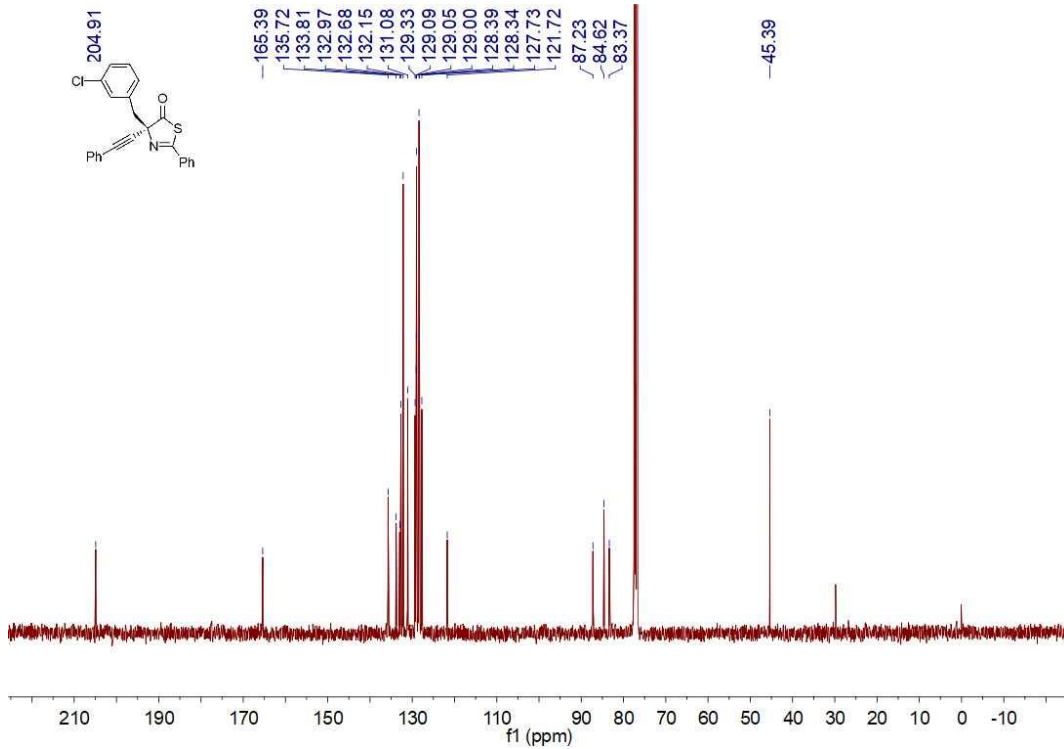

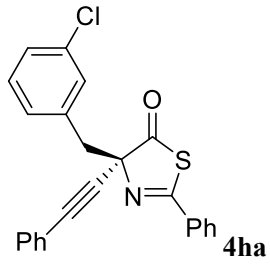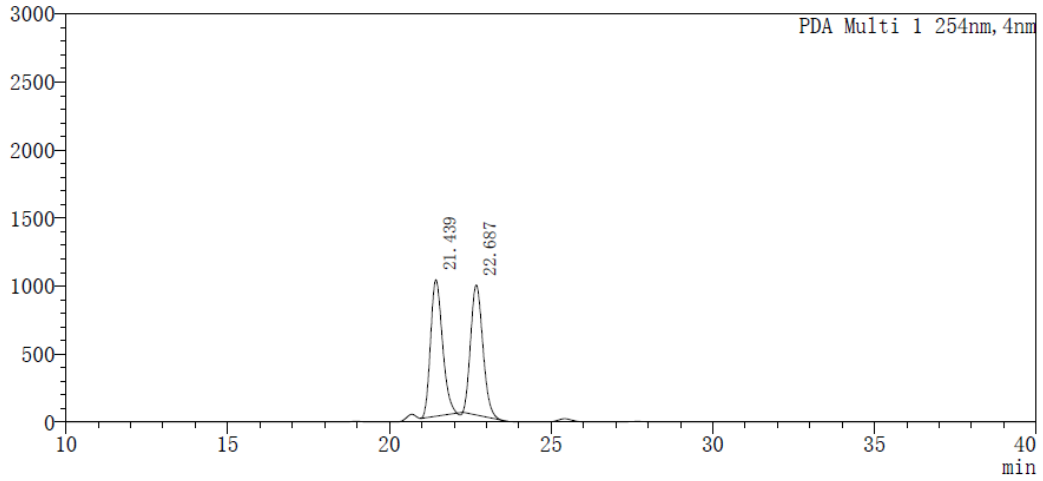

<Peak table>

PDA Ch1 254nm

| Peak# | Ret. Time | Height  | Area     | Area%   |
|-------|-----------|---------|----------|---------|
| 1     | 21.439    | 1002984 | 25582452 | 50.440  |
| 2     | 22.687    | 955725  | 25135657 | 49.560  |
| Total |           | 1958709 | 50718108 | 100.000 |

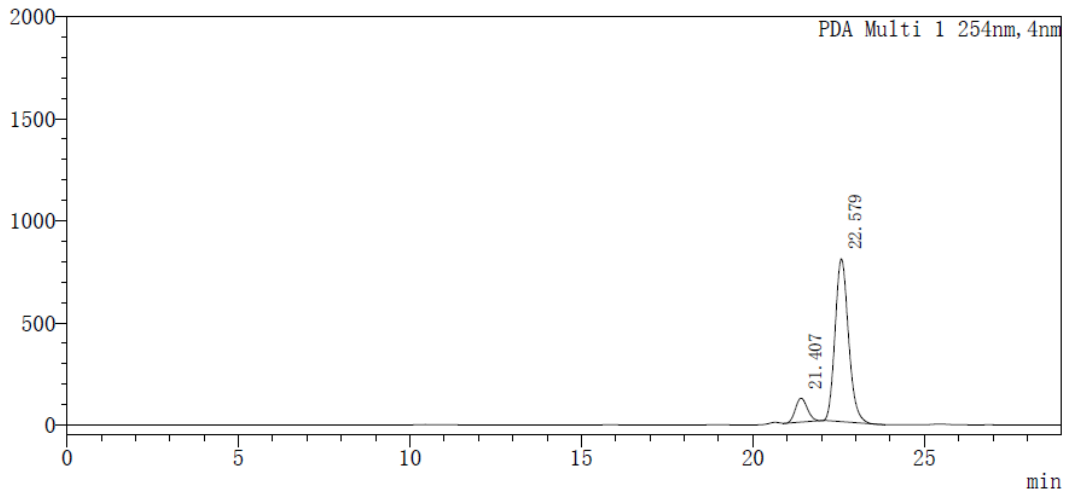

<Peak table>

PDA Ch1 254nm

| Peak# | Ret. Time | Height | Area     | Area%   |
|-------|-----------|--------|----------|---------|
| 1     | 21.407    | 117183 | 2807317  | 11.436  |
| 2     | 22.579    | 797976 | 21739778 | 88.564  |
| Total |           | 915159 | 24547095 | 100.000 |

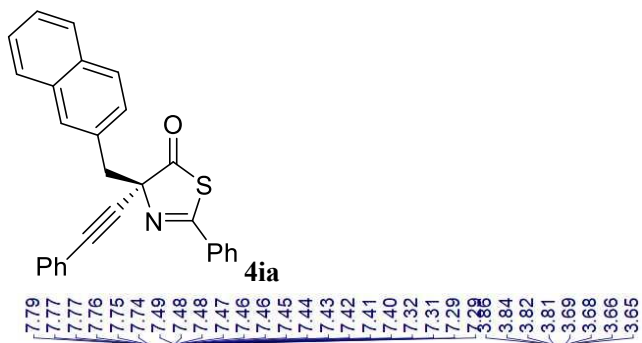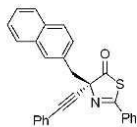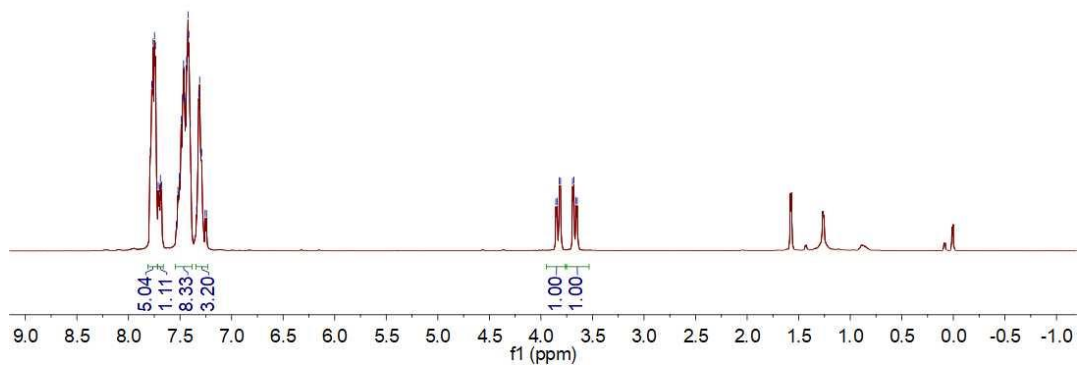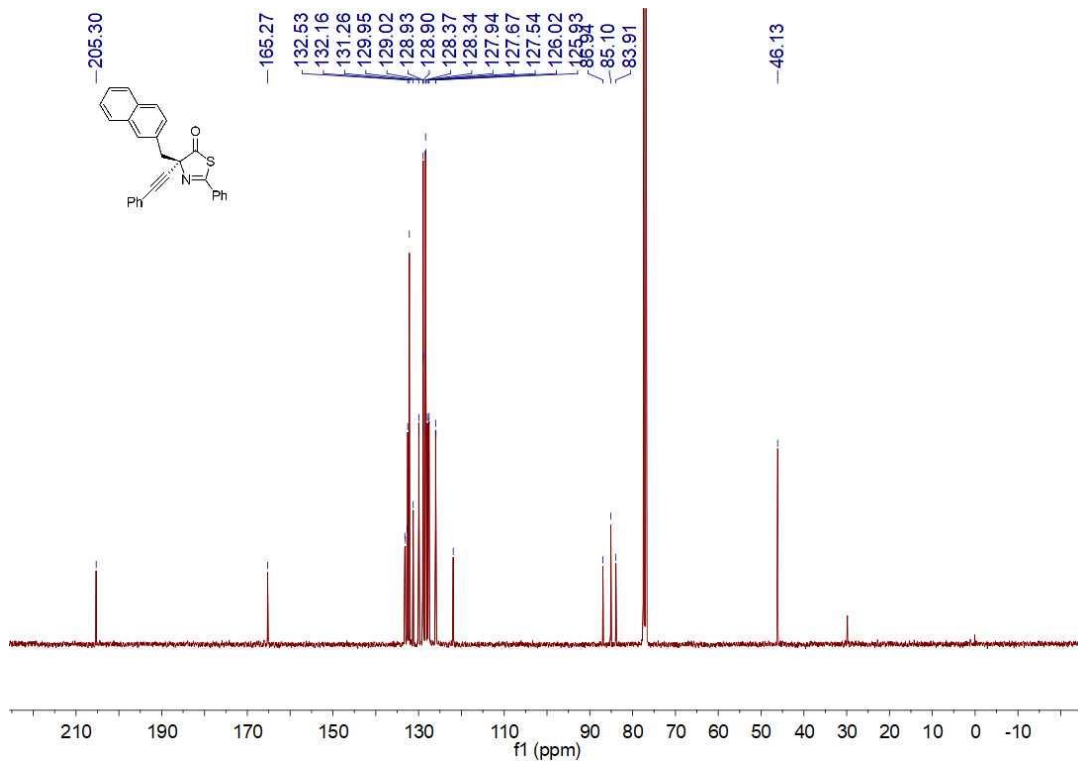

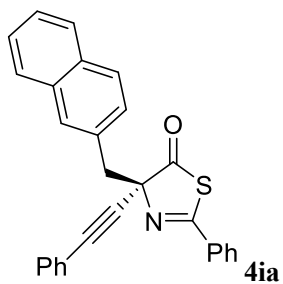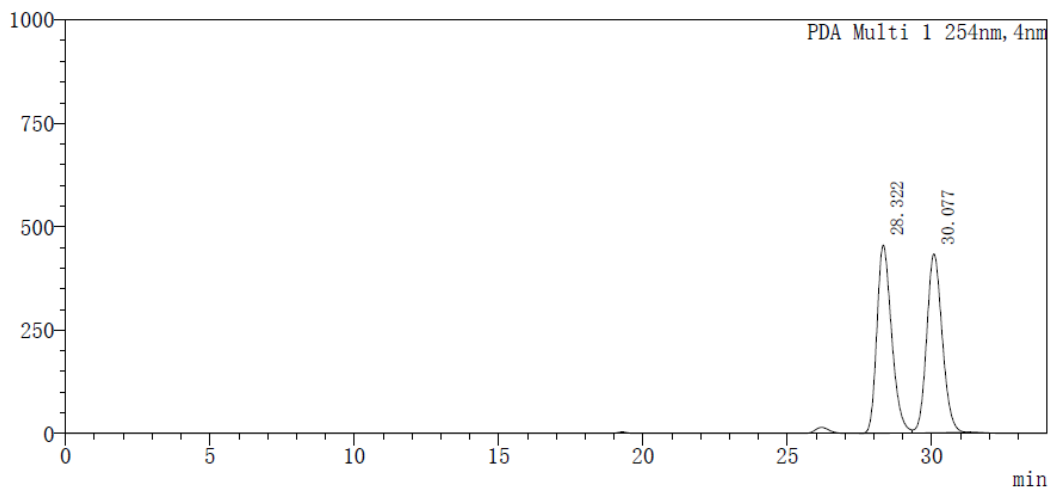

<Peak table>

PDA Ch1 254nm

| Peak# | Ret. Time | Height | Area     | Area%   |
|-------|-----------|--------|----------|---------|
| 1     | 28.322    | 454845 | 16203958 | 50.023  |
| 2     | 30.077    | 432631 | 16189153 | 49.977  |
| Total |           | 887475 | 32393111 | 100.000 |

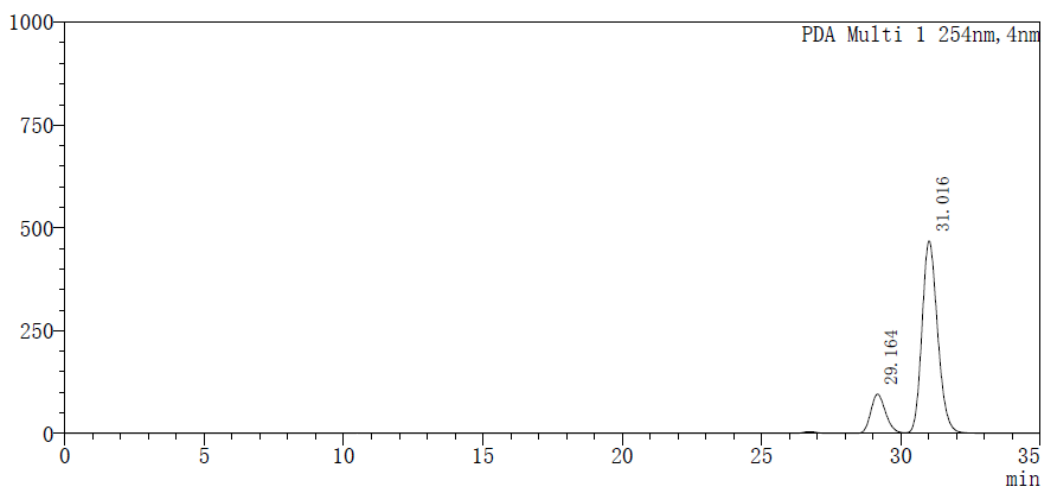

<Peak table>

PDA Ch1 254nm

| Peak# | Ret. Time | Height | Area     | Area%   |
|-------|-----------|--------|----------|---------|
| 1     | 29.164    | 95548  | 3566473  | 16.326  |
| 2     | 31.016    | 467846 | 18279254 | 83.674  |
| Total |           | 563394 | 21845727 | 100.000 |



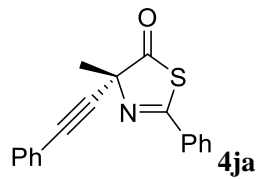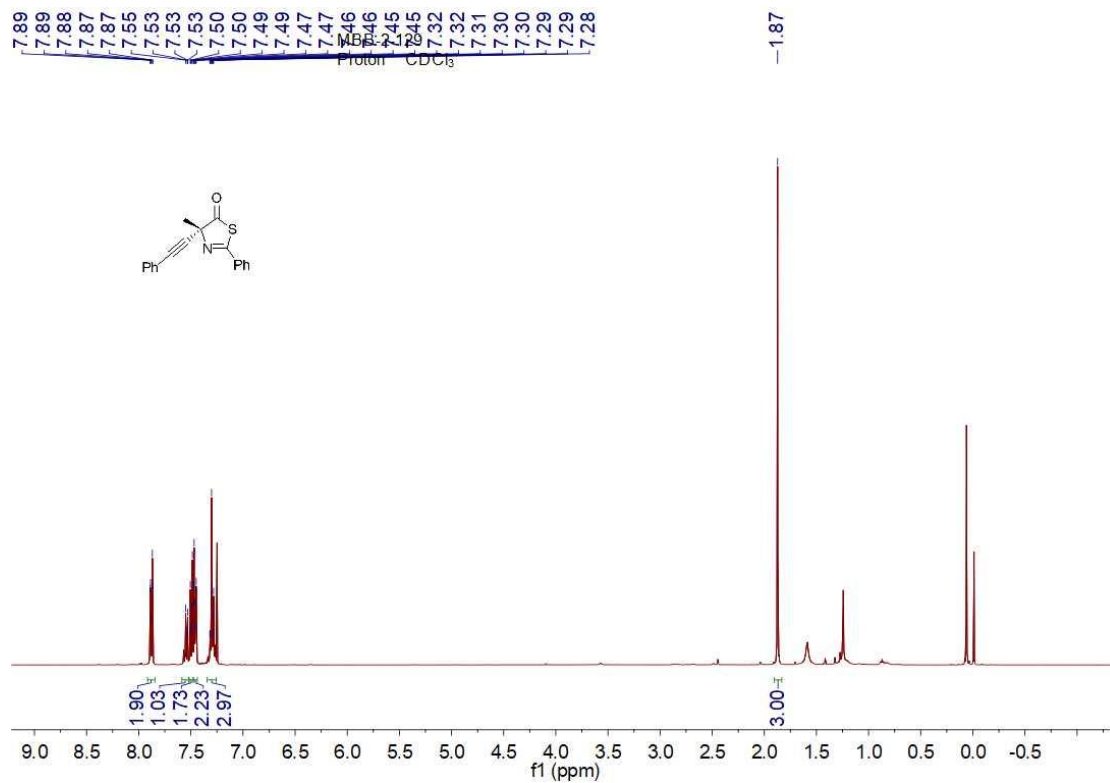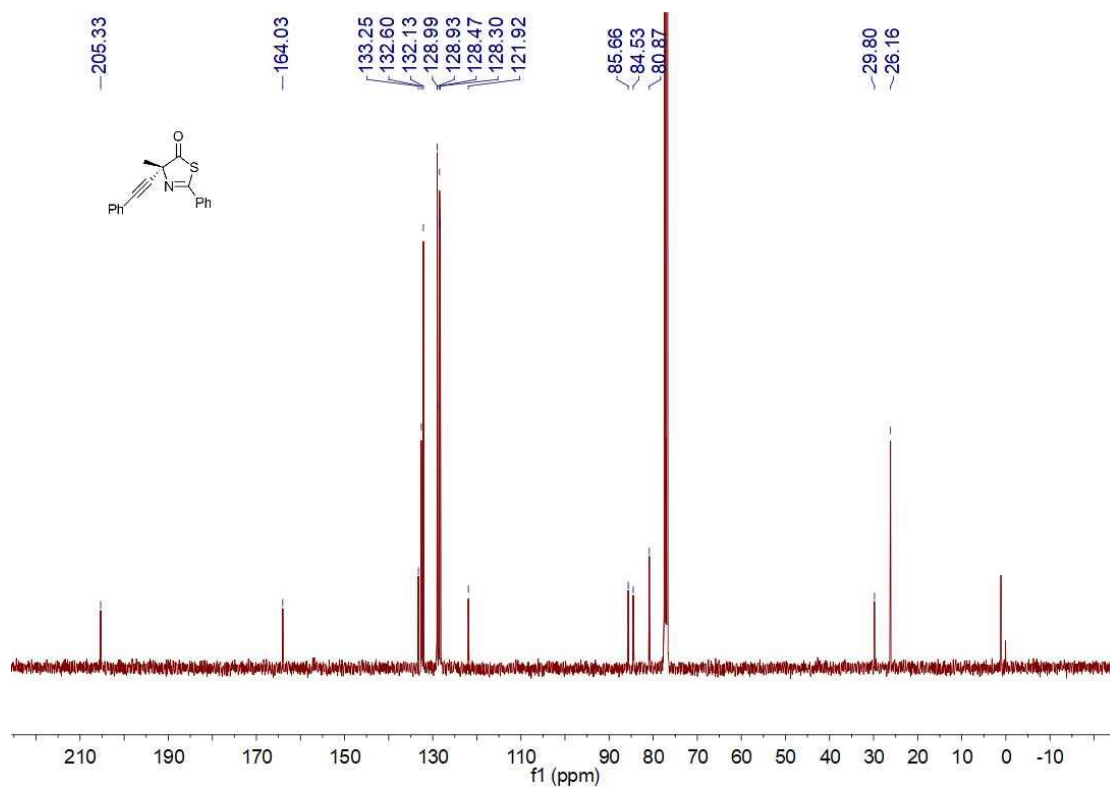

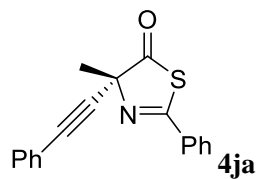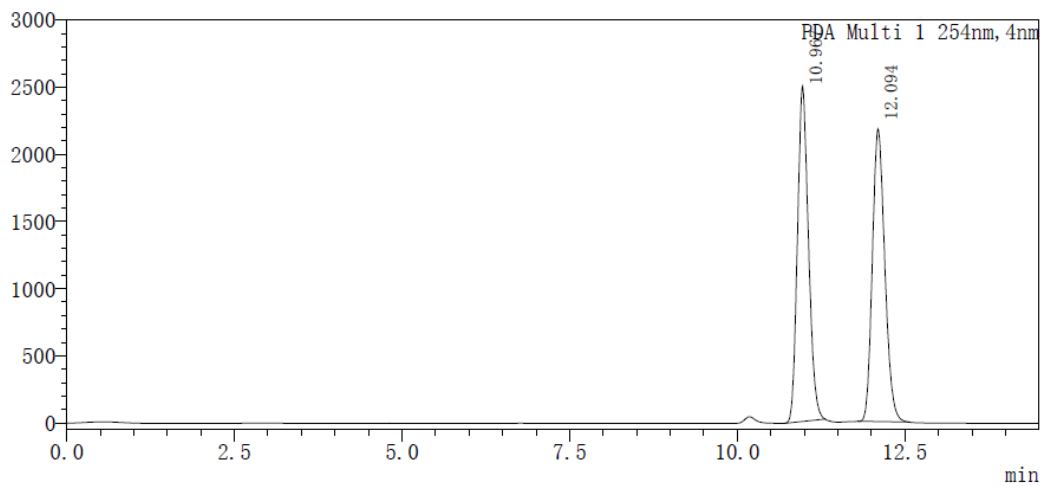

<Peak table>

PDA Ch1 254nm

| Peak# | Ret. Time | Height  | Area     | Area%   |
|-------|-----------|---------|----------|---------|
| 1     | 10.967    | 2495696 | 28392541 | 50.143  |
| 2     | 12.094    | 2179316 | 28230119 | 49.857  |
| Total |           | 4675012 | 56622659 | 100.000 |

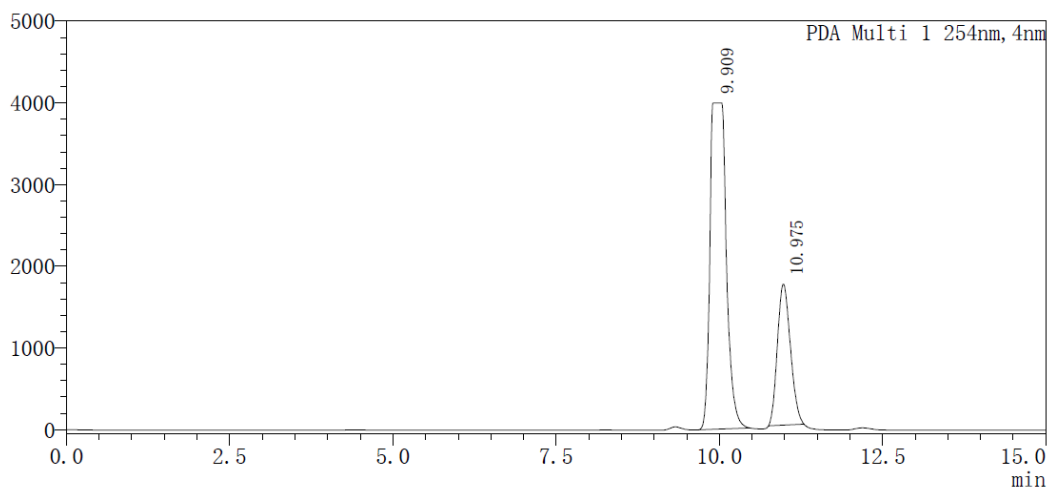

<Peak table>

PDA Ch1 254nm

| Peak# | Ret. Time | Height  | Area     | Area%   |
|-------|-----------|---------|----------|---------|
| 1     | 9.909     | 3994907 | 68950175 | 74.190  |
| 2     | 10.975    | 1726025 | 23987458 | 25.810  |
| Total |           | 5720932 | 92937633 | 100.000 |

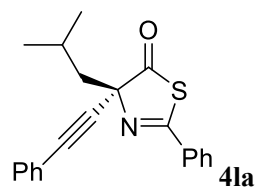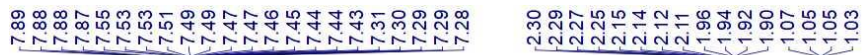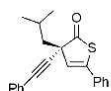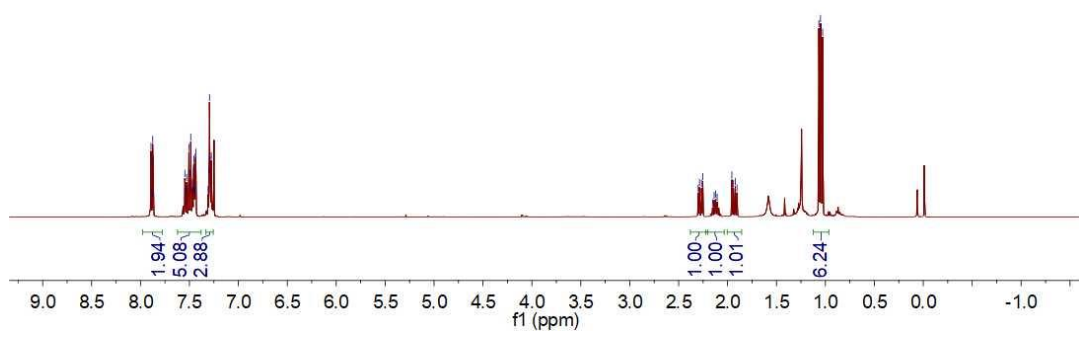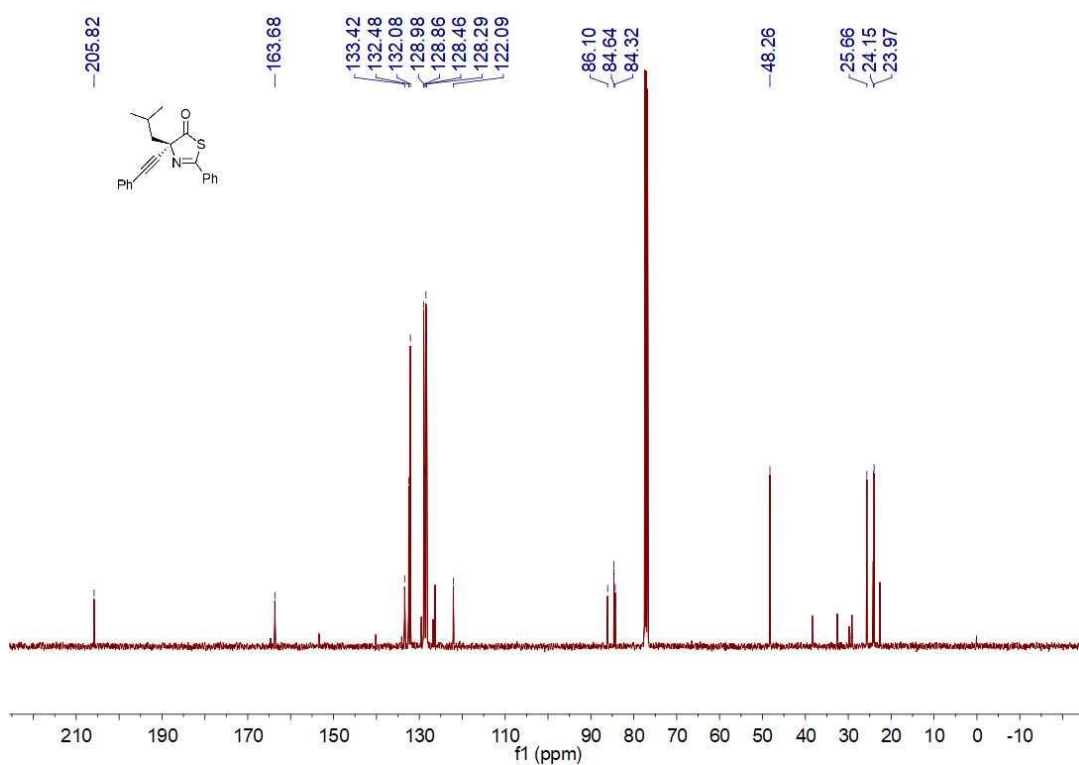

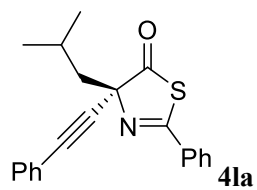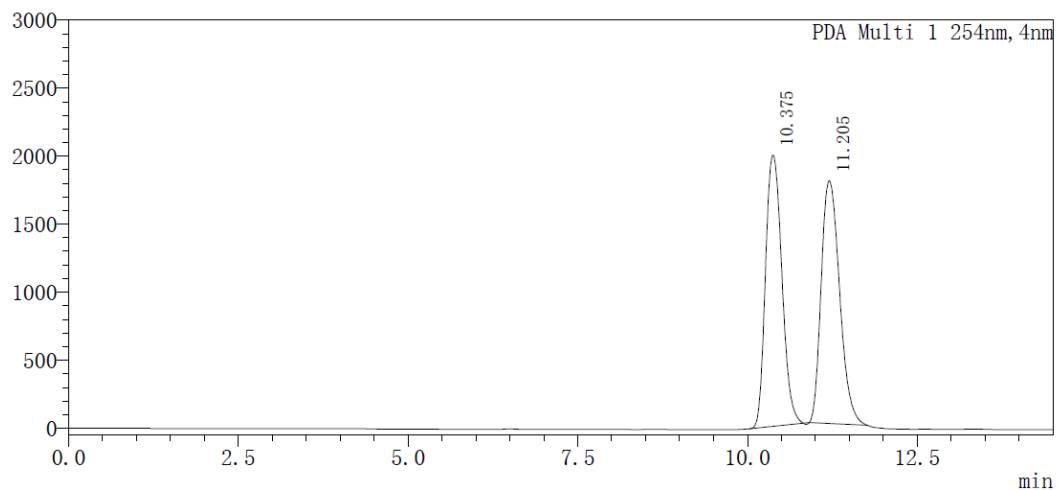

<Peak table>

PDA Ch1 254nm

| Peak# | Ret. Time | Height  | Area     | Area%   |
|-------|-----------|---------|----------|---------|
| 1     | 10.375    | 1993374 | 33435759 | 49.790  |
| 2     | 11.205    | 1784059 | 33717207 | 50.210  |
| Total |           | 3777433 | 67152967 | 100.000 |

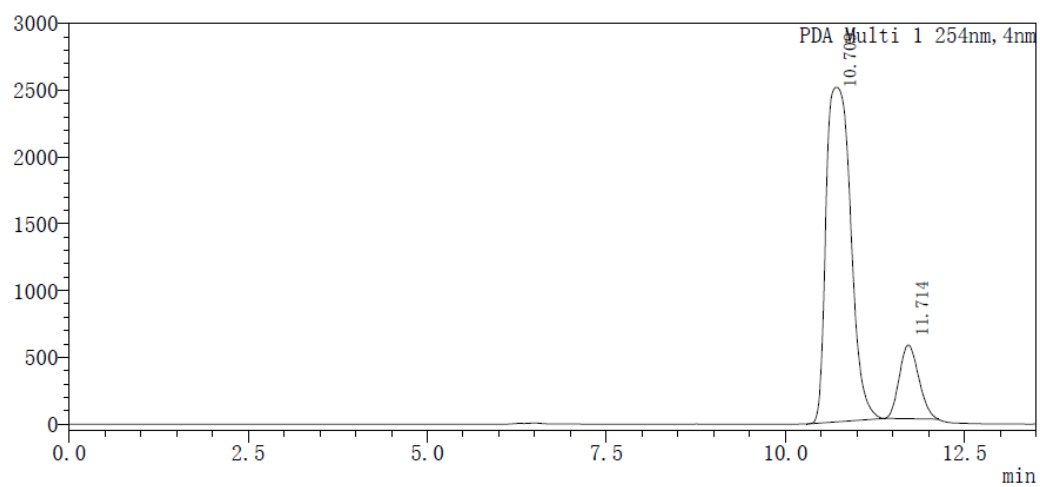

<Peak table>

PDA Ch1 254nm

| Peak# | Ret. Time | Height  | Area     | Area%   |
|-------|-----------|---------|----------|---------|
| 1     | 10.709    | 2504999 | 60065138 | 85.205  |
| 2     | 11.714    | 551869  | 10430108 | 14.795  |
| Total |           | 3056868 | 70495246 | 100.000 |

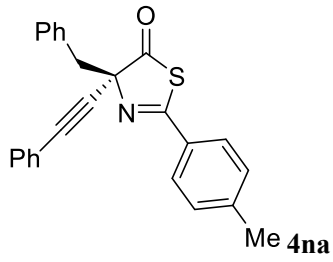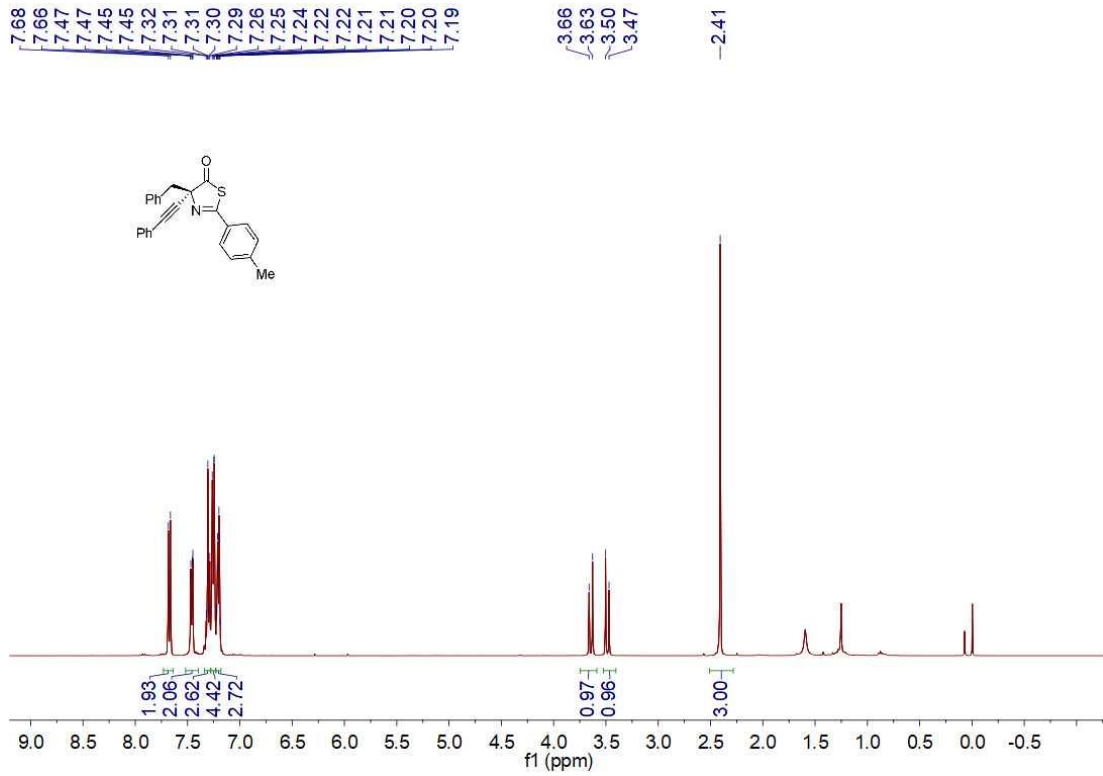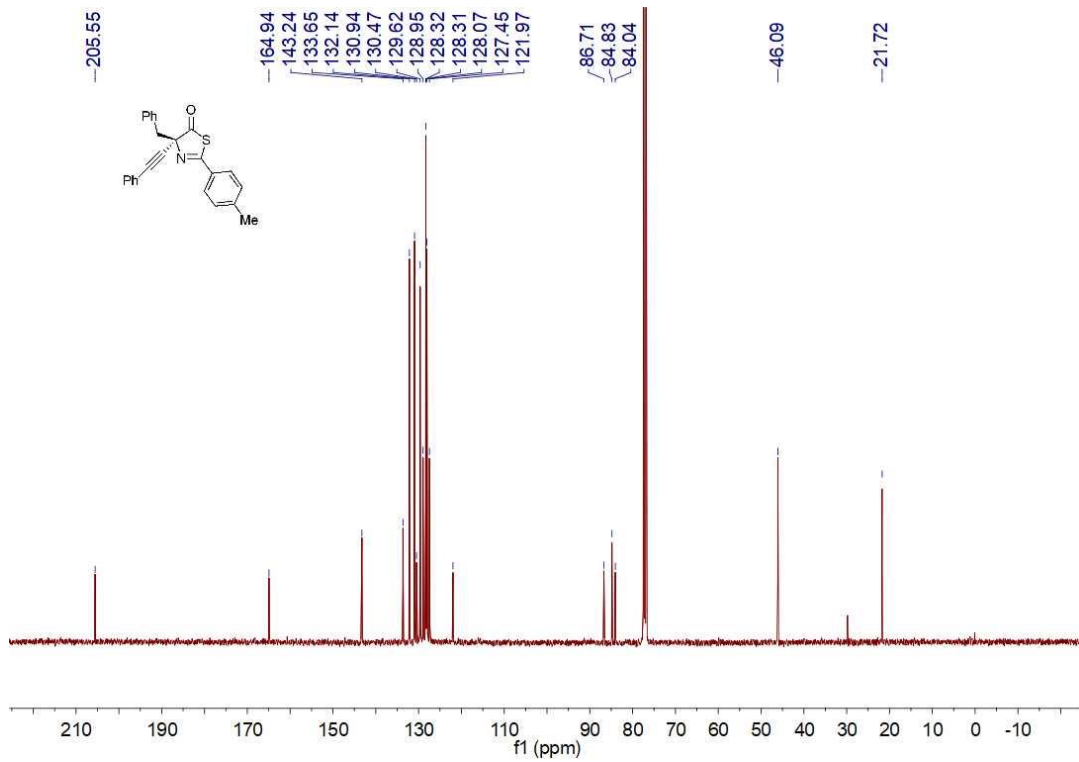

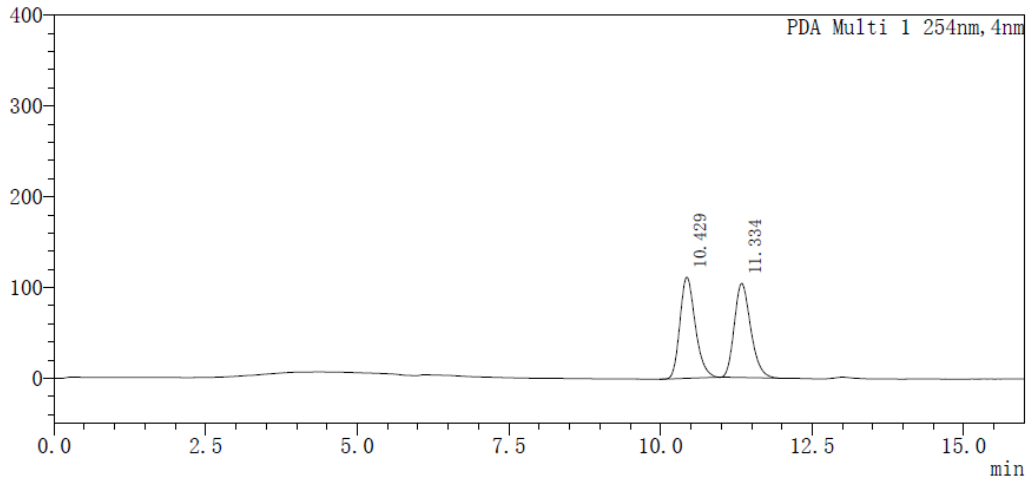

<Peak table>

PDA Ch1 254nm

| Peak# | Ret. Time | Height | Area    | Area%   |
|-------|-----------|--------|---------|---------|
| 1     | 10.429    | 111497 | 1971820 | 50.161  |
| 2     | 11.334    | 103792 | 1959148 | 49.839  |
| Total |           | 215289 | 3930967 | 100.000 |

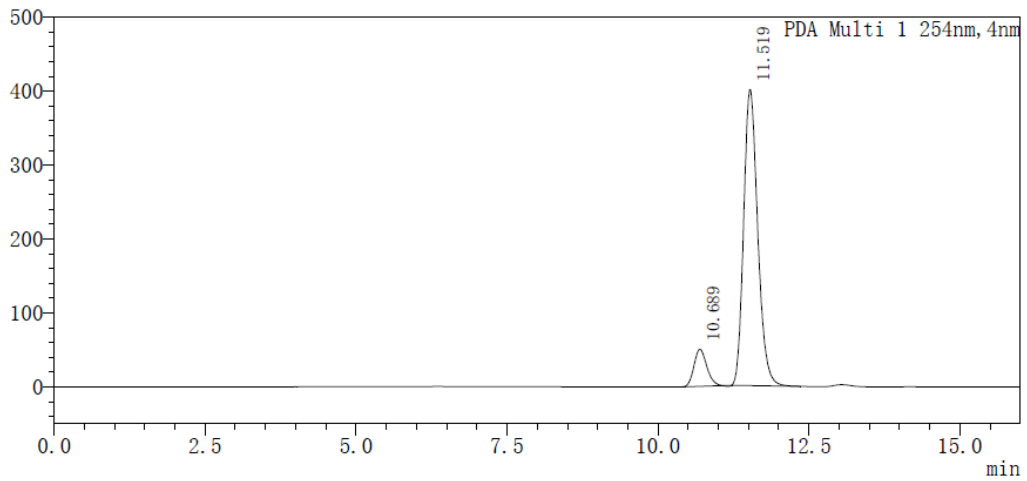

<Peak table>

PDA Ch1 254nm

| Peak# | Ret. Time | Height | Area    | Area%   |
|-------|-----------|--------|---------|---------|
| 1     | 10.689    | 50055  | 730219  | 10.133  |
| 2     | 11.519    | 400494 | 6476112 | 89.867  |
| Total |           | 450549 | 7206331 | 100.000 |

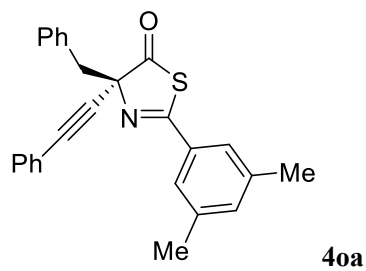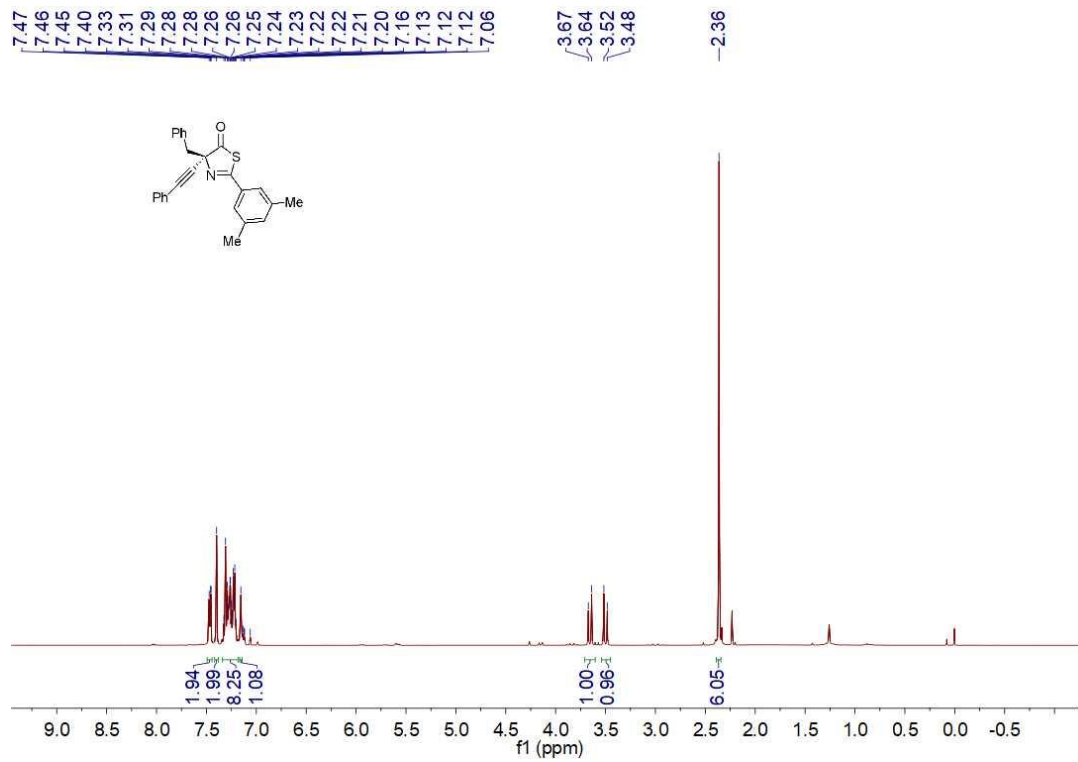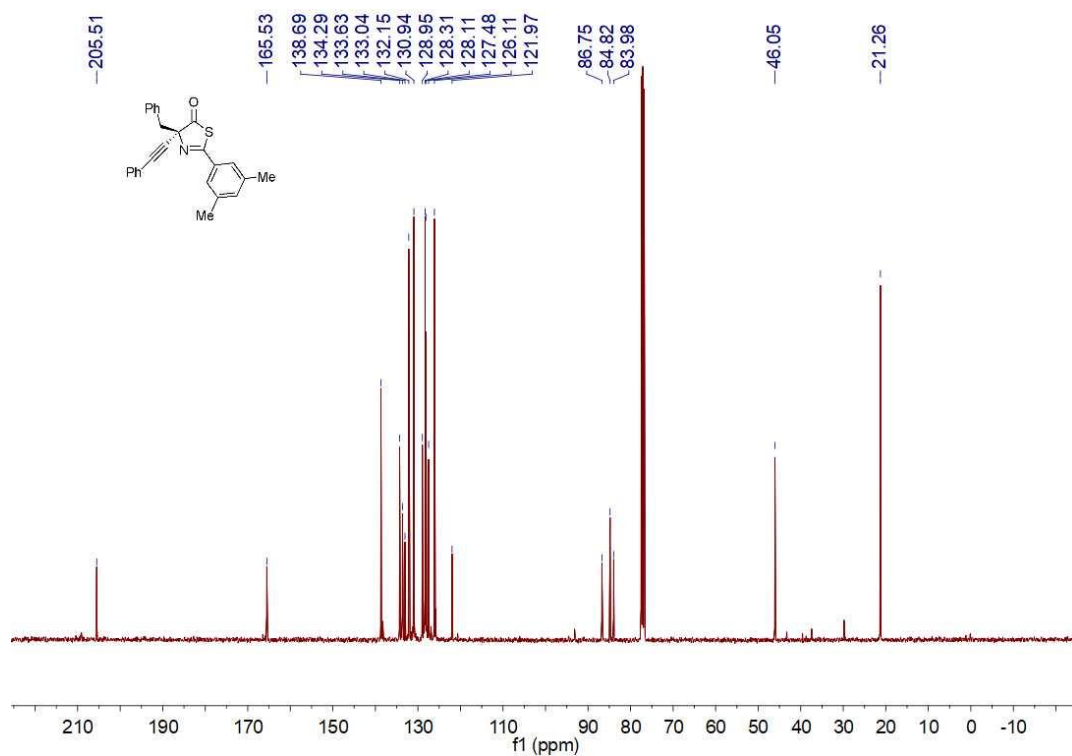

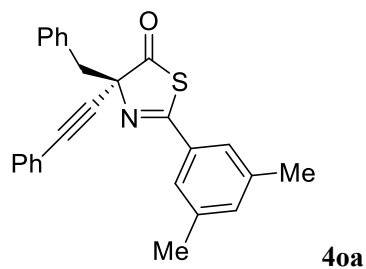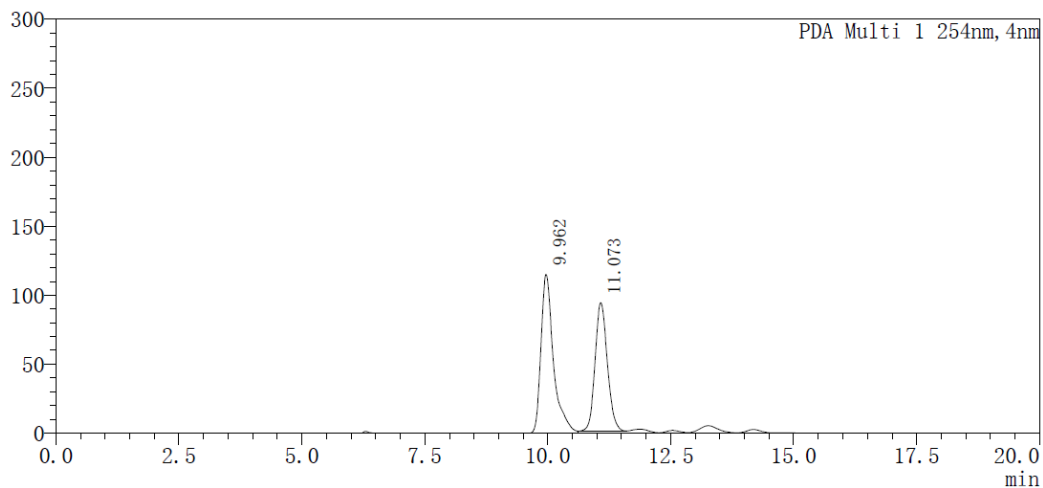

<Peak table>

PDA Ch1 254nm

| Peak# | Ret. Time | Height | Area    | Area%   |
|-------|-----------|--------|---------|---------|
| 1     | 9.962     | 115084 | 2040496 | 55.926  |
| 2     | 11.073    | 92888  | 1608087 | 44.074  |
| Total |           | 207972 | 3648583 | 100.000 |

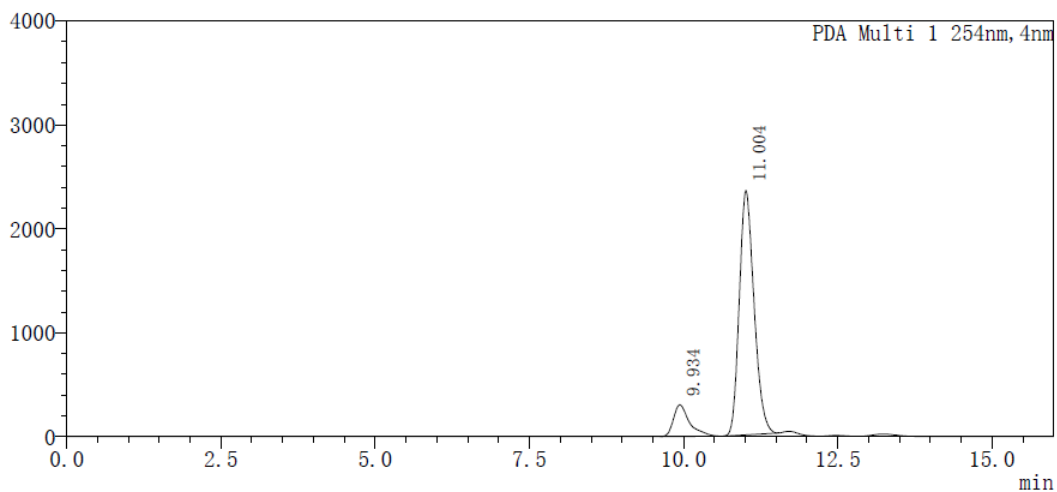

<Peak table>

PDA Ch1 254nm

| Peak# | Ret. Time | Height  | Area     | Area%   |
|-------|-----------|---------|----------|---------|
| 1     | 9.934     | 305680  | 5525023  | 12.366  |
| 2     | 11.004    | 2350526 | 39155562 | 87.634  |
| Total |           | 2656206 | 44680585 | 100.000 |



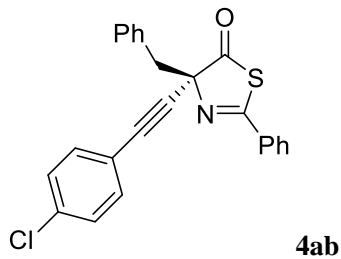

7.779  
7.777  
7.755  
7.553  
7.511  
7.48  
7.46  
7.44  
7.39  
7.37  
7.28  
7.26  
7.25  
7.24  
7.24  
7.23  
7.22  
7.21  
7.21  
7.20

3.65  
3.62  
3.50  
3.47

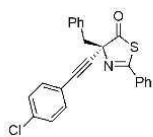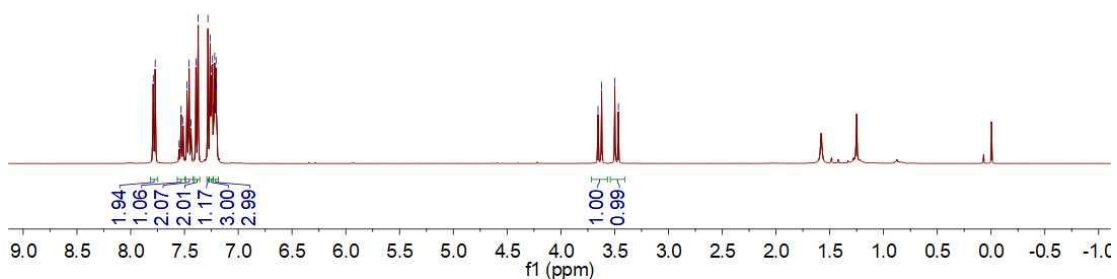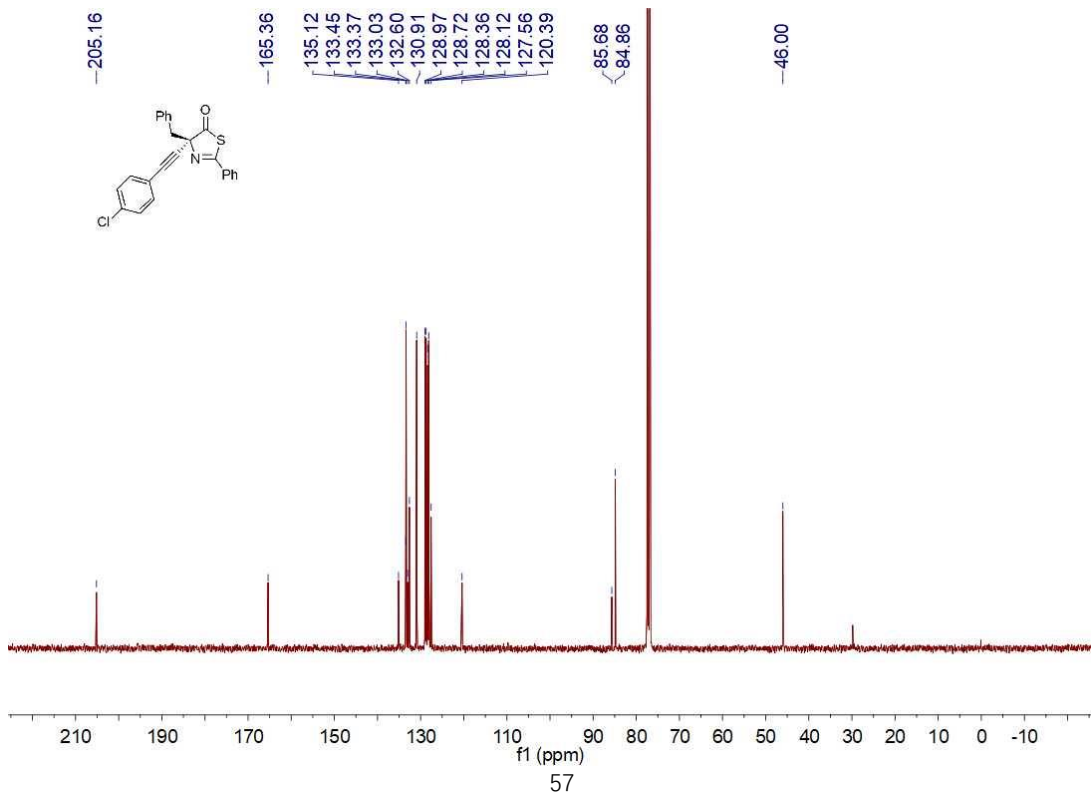

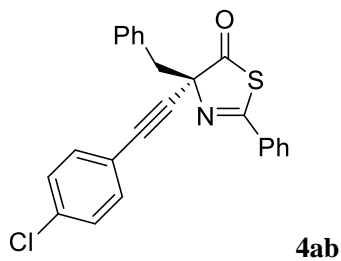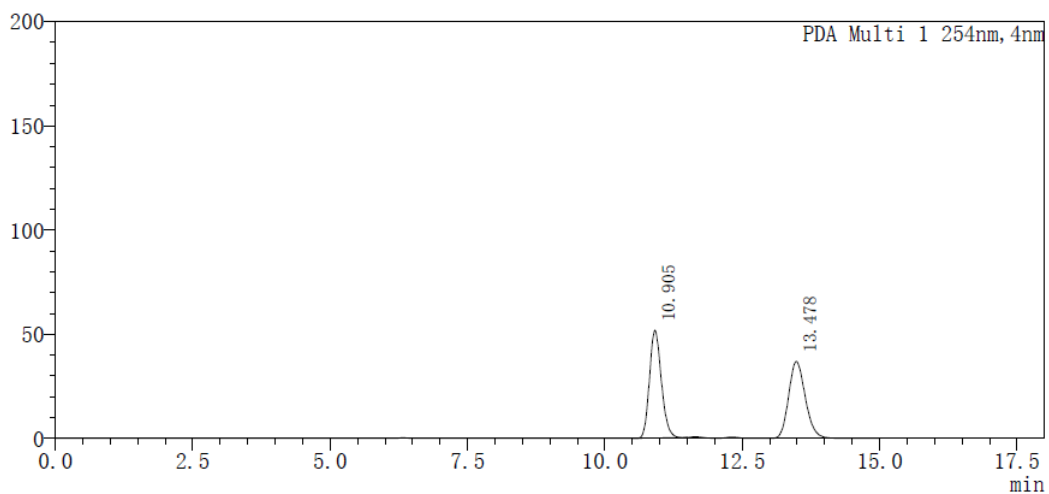

<Peak table>

PDA Ch1 254nm

| Peak# | Ret. Time | Height | Area    | Area%   |
|-------|-----------|--------|---------|---------|
| 1     | 10.905    | 51755  | 779318  | 49.897  |
| 2     | 13.478    | 36971  | 782521  | 50.103  |
| Total |           | 88726  | 1561839 | 100.000 |

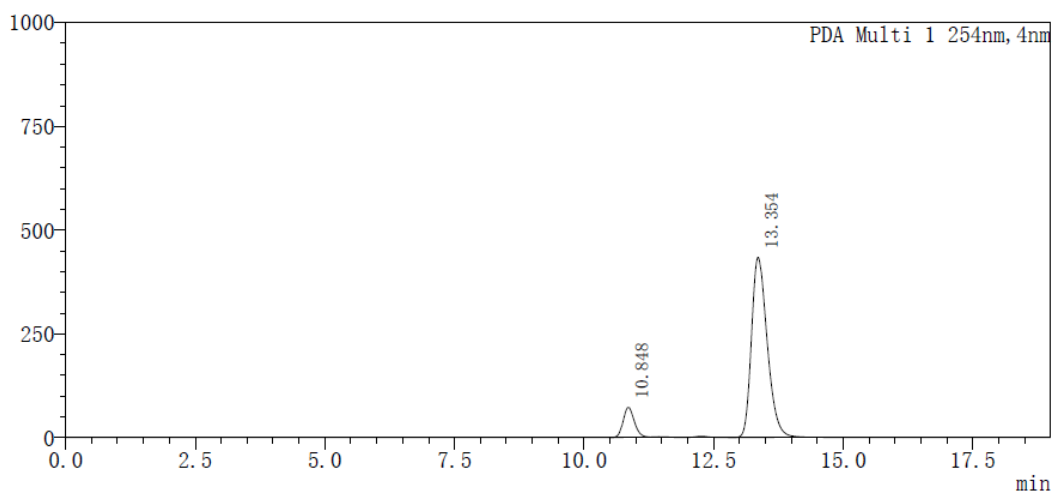

<Peak table>

PDA Ch1 254nm

| Peak# | Ret. Time | Height | Area     | Area%   |
|-------|-----------|--------|----------|---------|
| 1     | 10.848    | 72396  | 1078760  | 10.536  |
| 2     | 13.354    | 433972 | 9160140  | 89.464  |
| Total |           | 506367 | 10238901 | 100.000 |

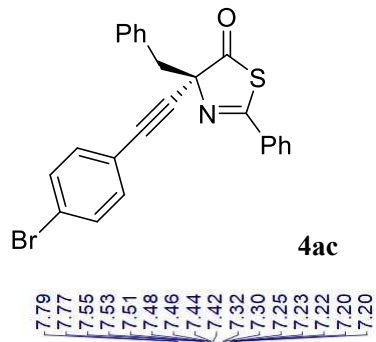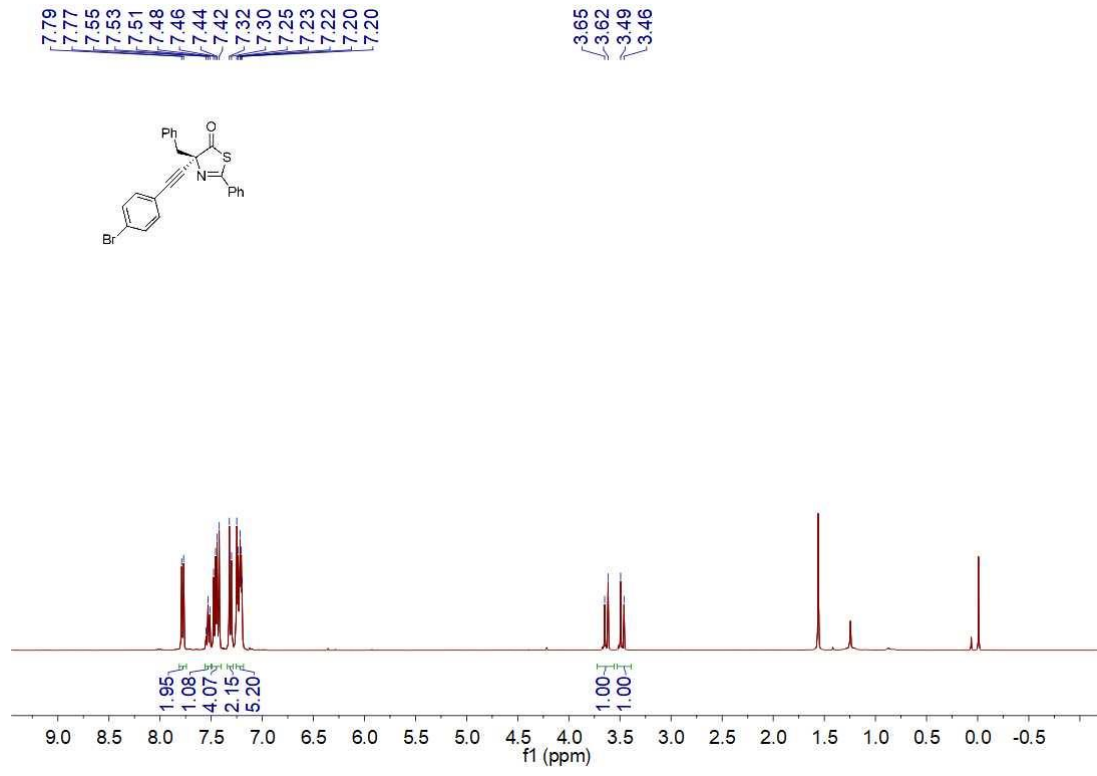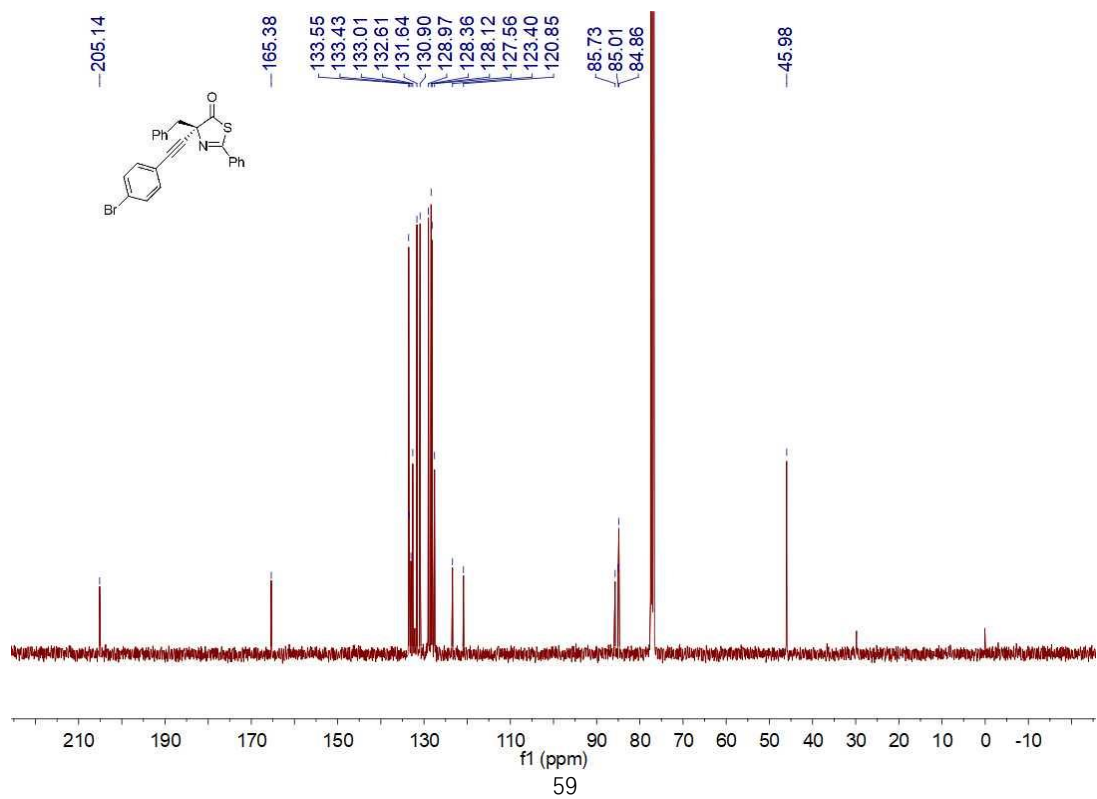

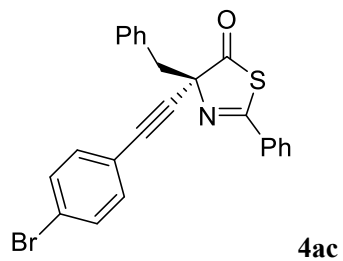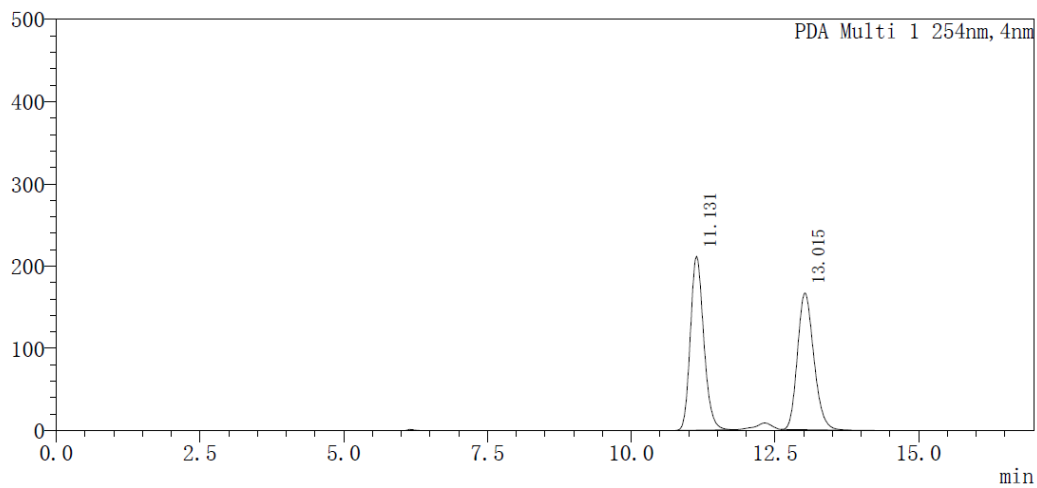

<Peak table>

PDA Ch1 254nm

| Peak# | Ret. Time | Height | Area    | Area%   |
|-------|-----------|--------|---------|---------|
| 1     | 11.131    | 211324 | 3432943 | 51.050  |
| 2     | 13.015    | 166268 | 3291733 | 48.950  |
| Total |           | 377593 | 6724676 | 100.000 |

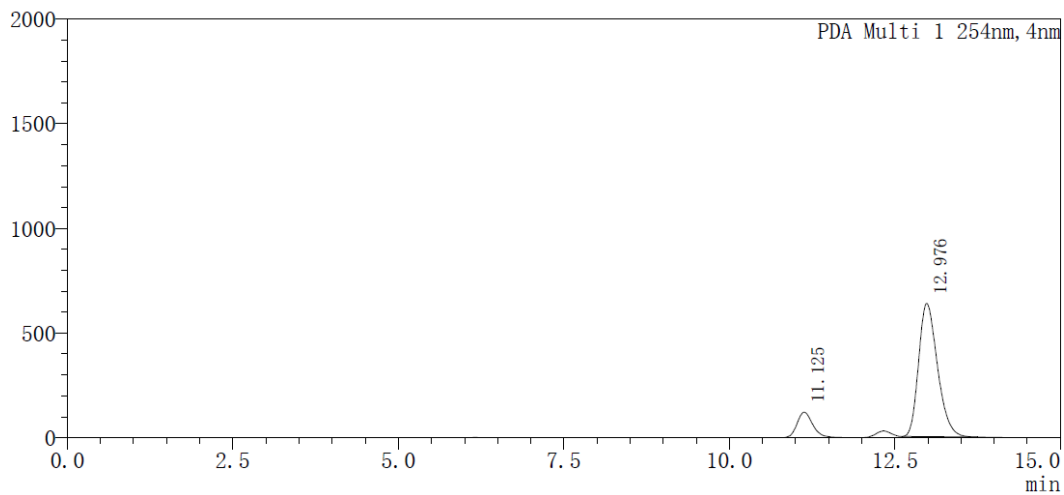

<Peak table>

PDA Ch1 254nm

| Peak# | Ret. Time | Height | Area     | Area%   |
|-------|-----------|--------|----------|---------|
| 1     | 11.125    | 120132 | 1935207  | 13.267  |
| 2     | 12.976    | 637767 | 12651668 | 86.733  |
| Total |           | 757899 | 14586875 | 100.000 |

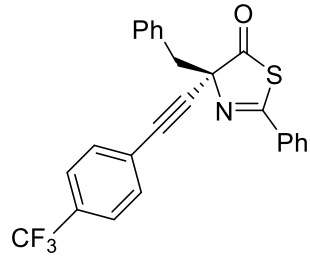

**4ad**

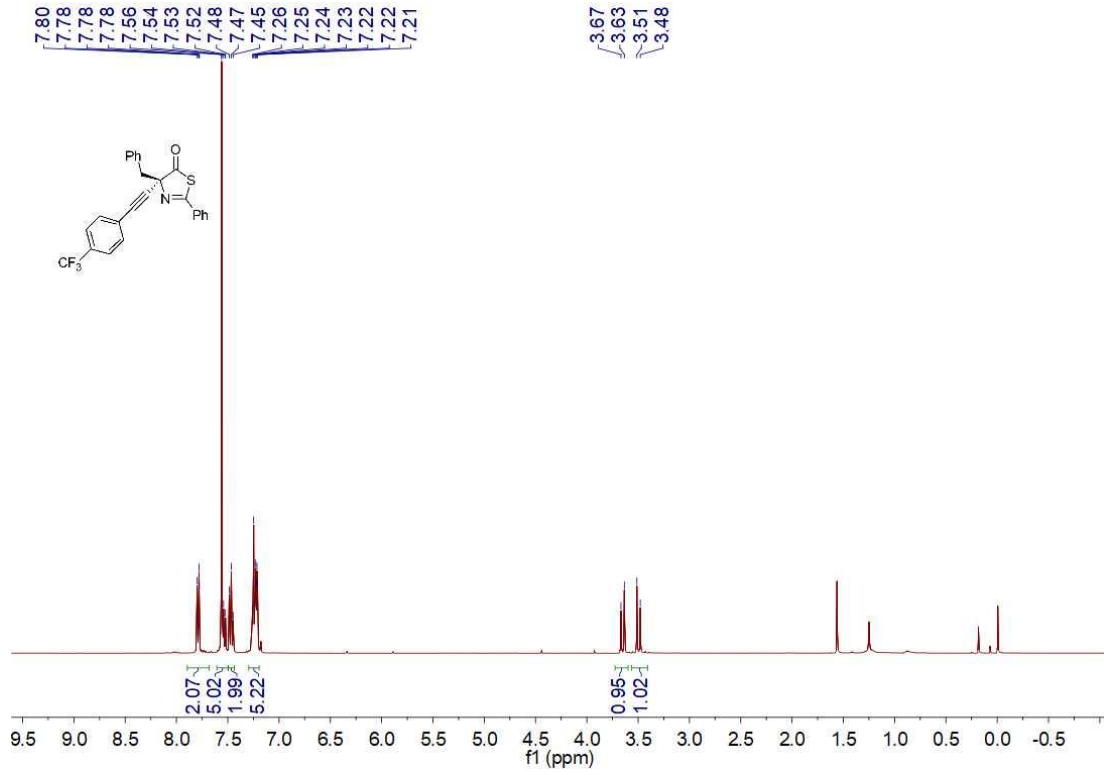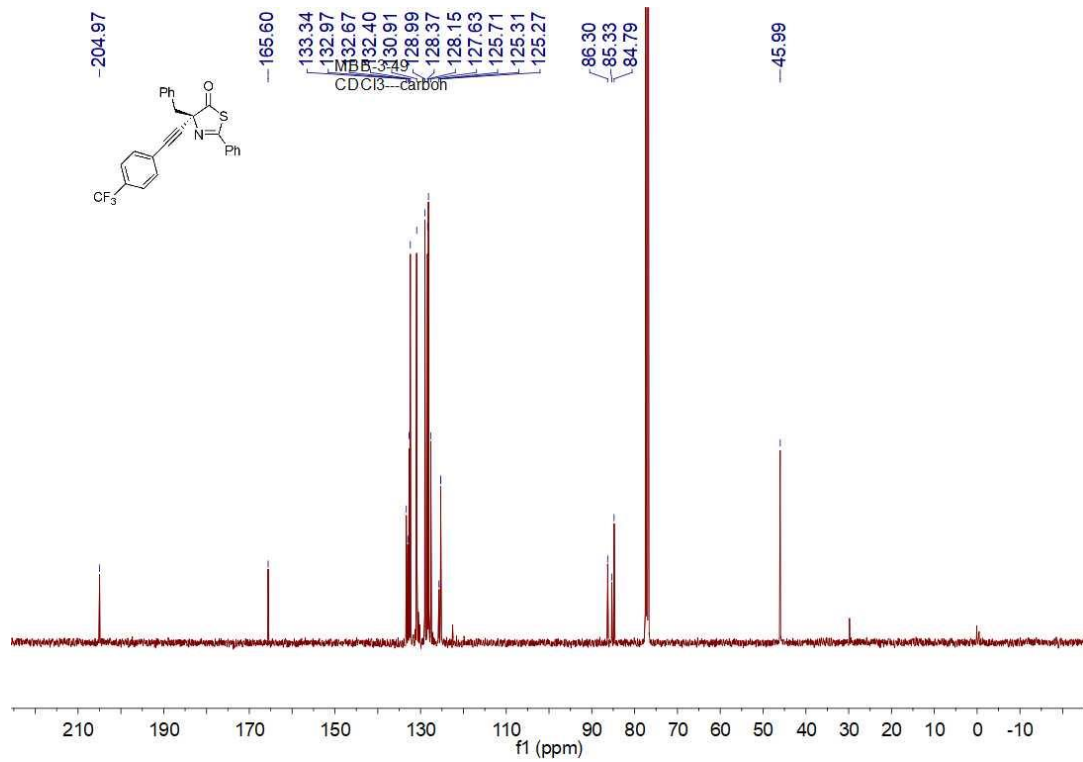

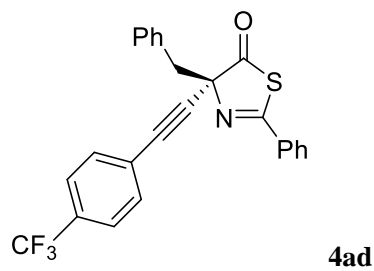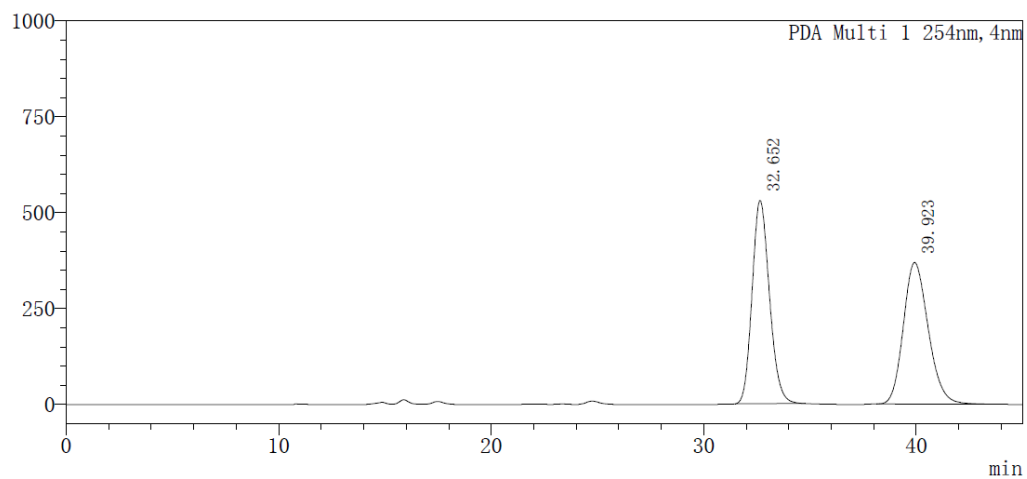

<Peak table>

PDA Ch1 254nm

| Peak# | Ret. Time | Height | Area     | Area%   |
|-------|-----------|--------|----------|---------|
| 1     | 32.652    | 529923 | 30079883 | 50.002  |
| 2     | 39.923    | 369061 | 30077620 | 49.998  |
| Total |           | 898985 | 60157504 | 100.000 |

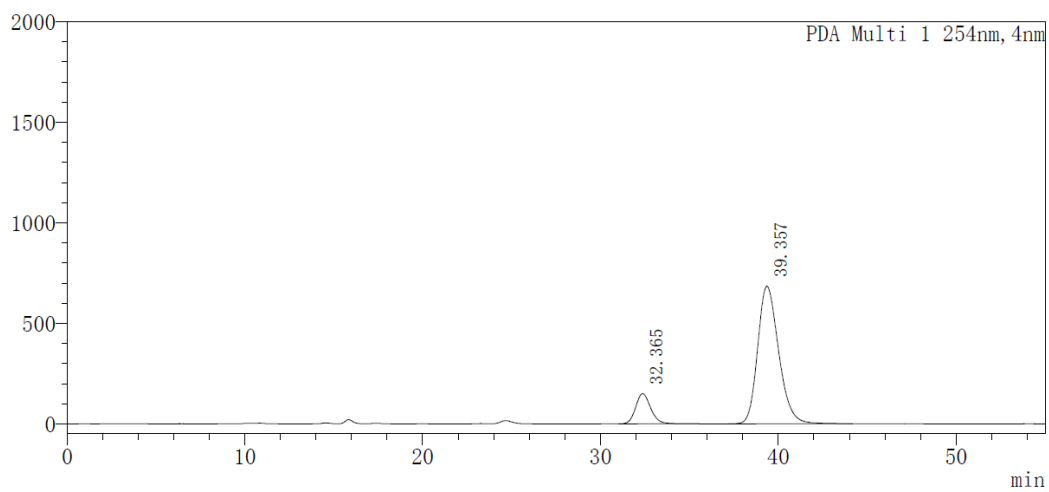

<Peak table>

PDA Ch1 254nm

| Peak# | Ret. Time | Height | Area     | Area%   |
|-------|-----------|--------|----------|---------|
| 1     | 32.365    | 150239 | 8826003  | 13.568  |
| 2     | 39.357    | 684356 | 56221844 | 86.432  |
| Total |           | 834595 | 65047847 | 100.000 |

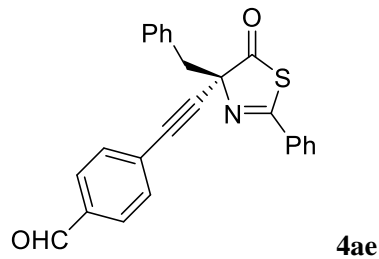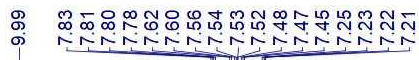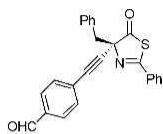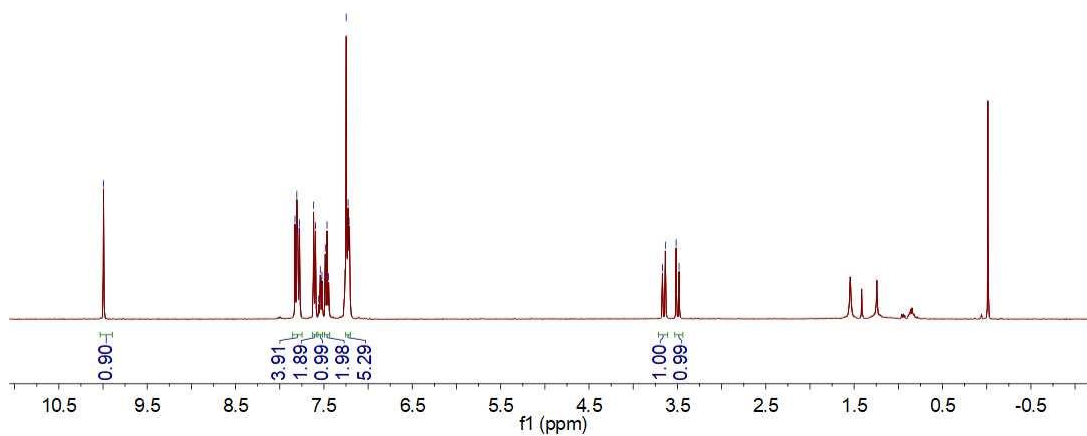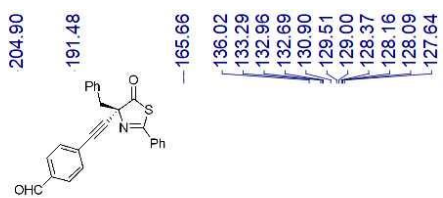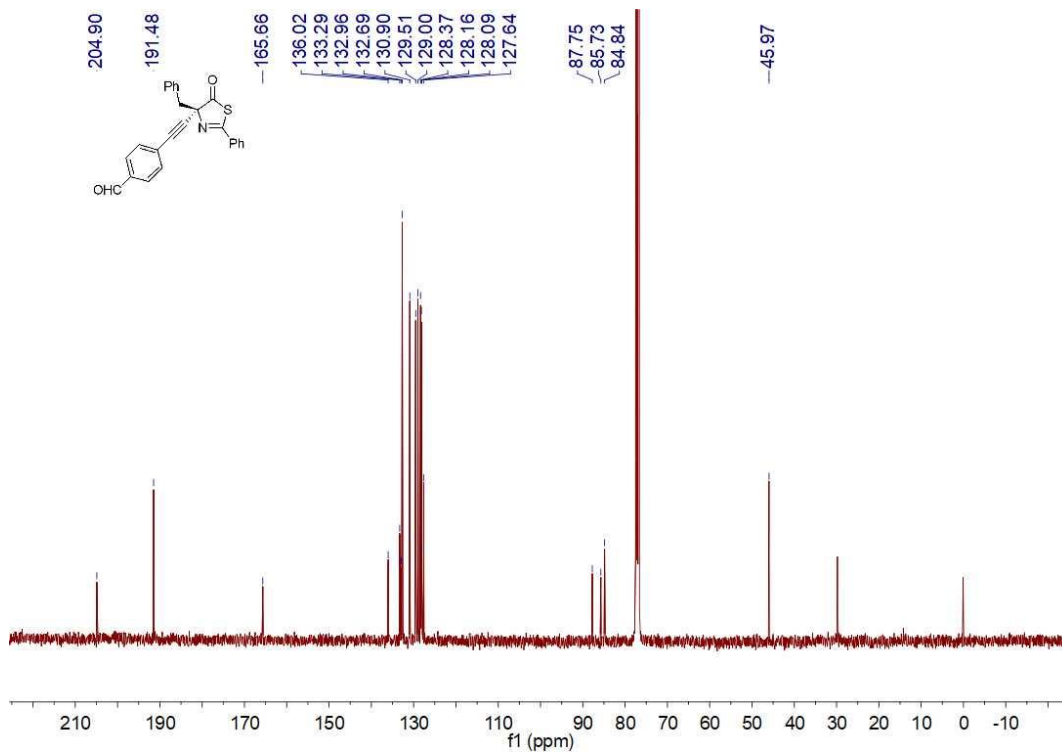

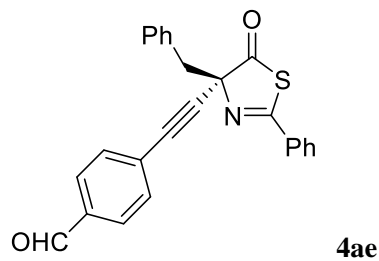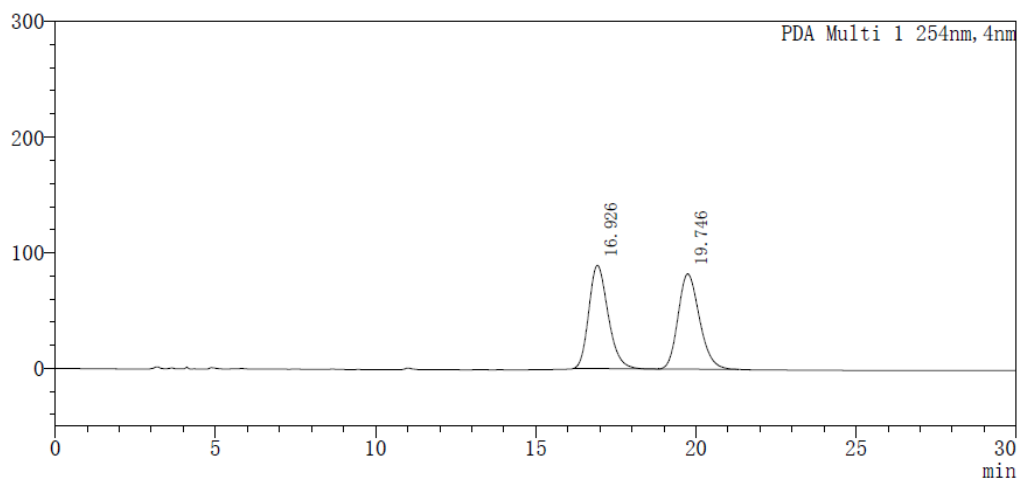

<Peak table>

PDA Ch1 254nm

| Peak# | Ret. Time | Height | Area    | Area%   |
|-------|-----------|--------|---------|---------|
| 1     | 16.926    | 89235  | 3736694 | 49.313  |
| 2     | 19.746    | 82386  | 3840880 | 50.687  |
| Total |           | 171620 | 7577574 | 100.000 |

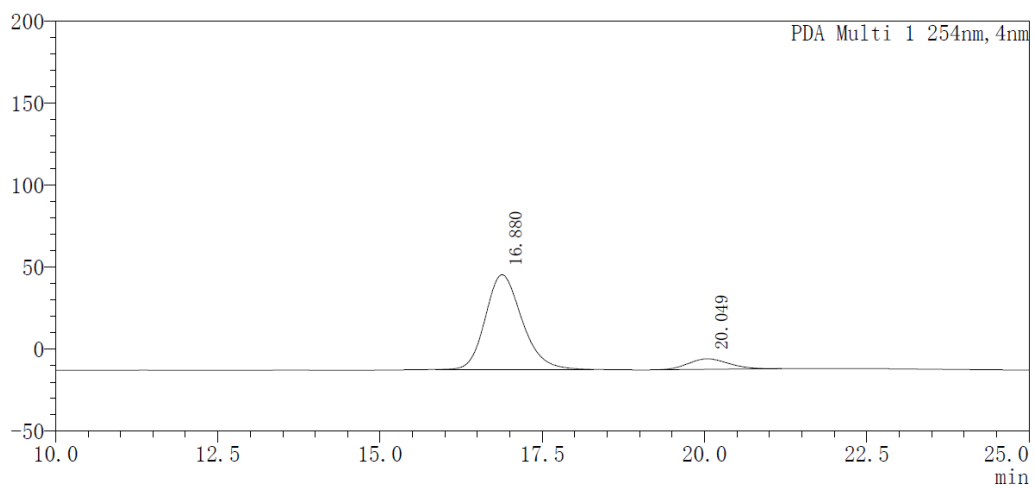

<Peak table>

PDA Ch1 254nm

| Peak# | Ret. Time | Height | Area    | Area%   |
|-------|-----------|--------|---------|---------|
| 1     | 16.880    | 57764  | 2268026 | 89.100  |
| 2     | 20.049    | 6379   | 277446  | 10.900  |
| Total |           | 64142  | 2545472 | 100.000 |



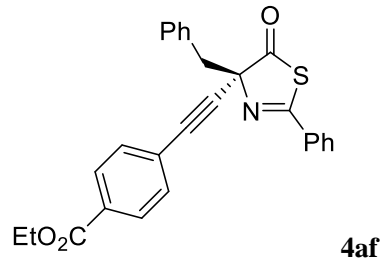

7.99  
7.97  
7.79  
7.78  
7.53  
7.53  
7.51  
7.50  
7.48  
7.46  
7.44  
7.27  
7.27  
7.26  
7.25  
7.23  
7.22  
7.22  
7.21  
7.20

4.39  
4.37  
4.35  
4.34  
3.67  
3.64  
3.52  
3.48

1.40  
1.38  
1.36

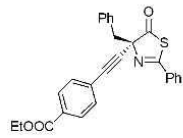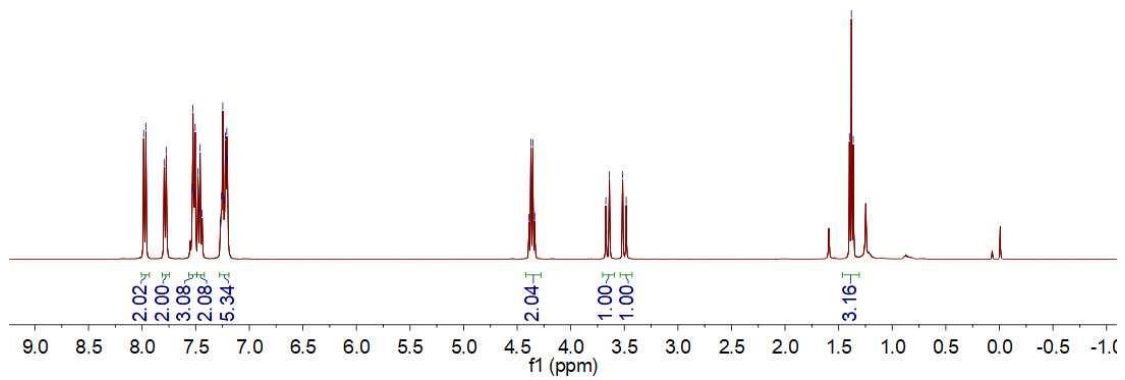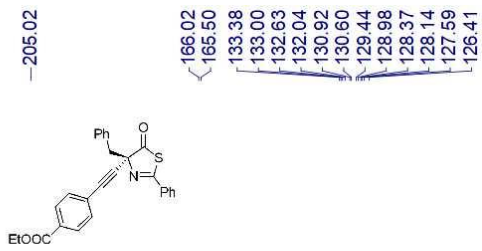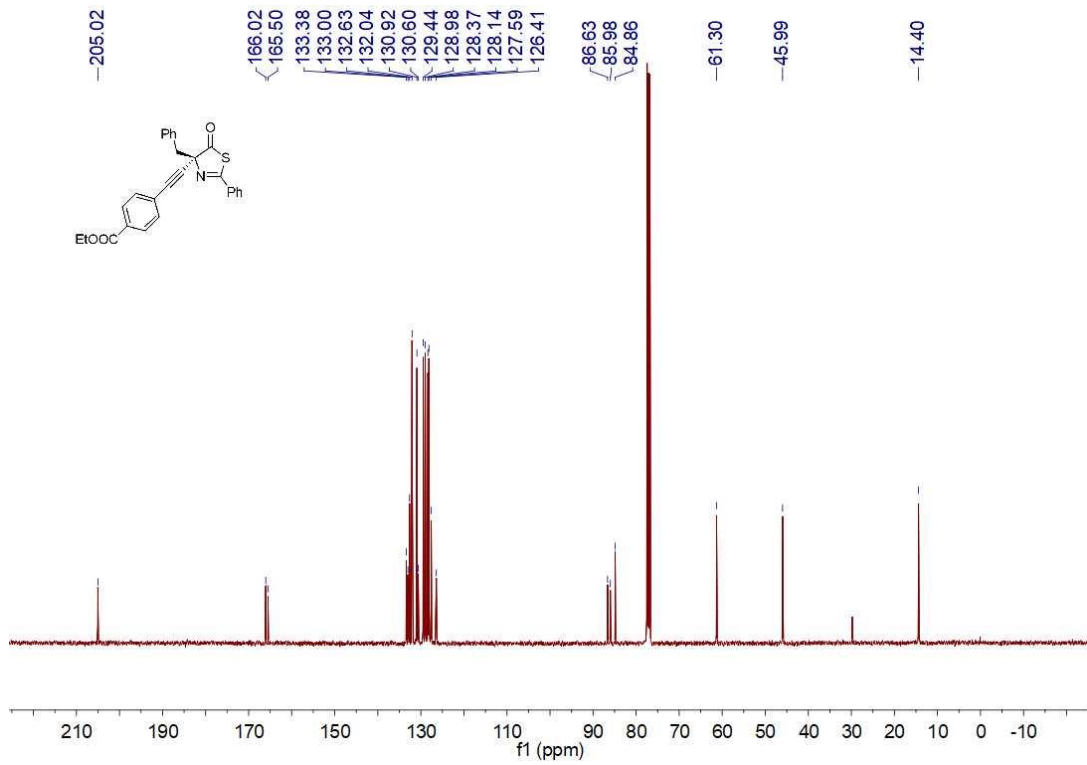

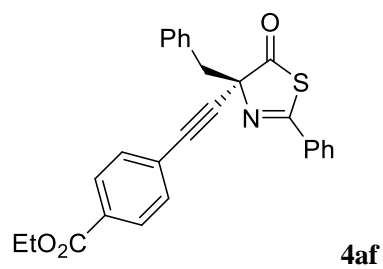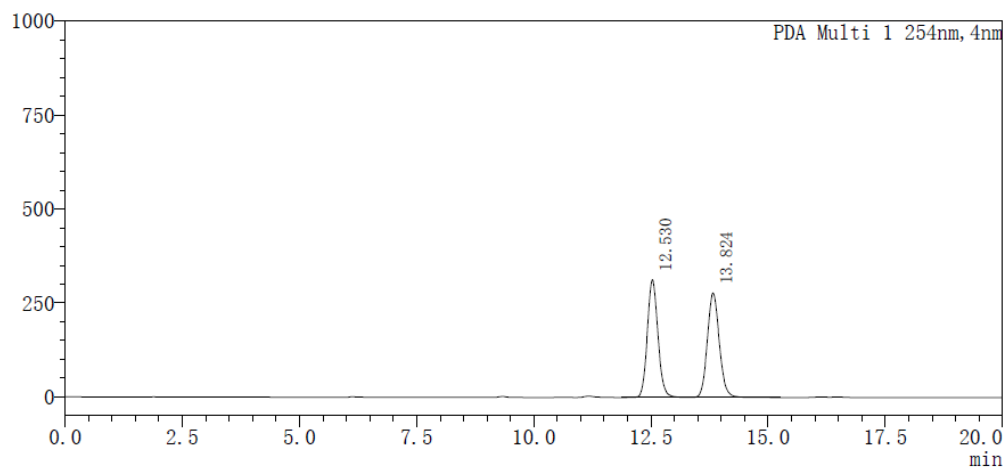

<Peak table>

PDA Ch1 254nm

| Peak# | Ret. Time | Height | Area    | Area%   |
|-------|-----------|--------|---------|---------|
| 1     | 12.530    | 313474 | 4960435 | 49.999  |
| 2     | 13.824    | 278340 | 4960661 | 50.001  |
| Total |           | 591815 | 9921096 | 100.000 |

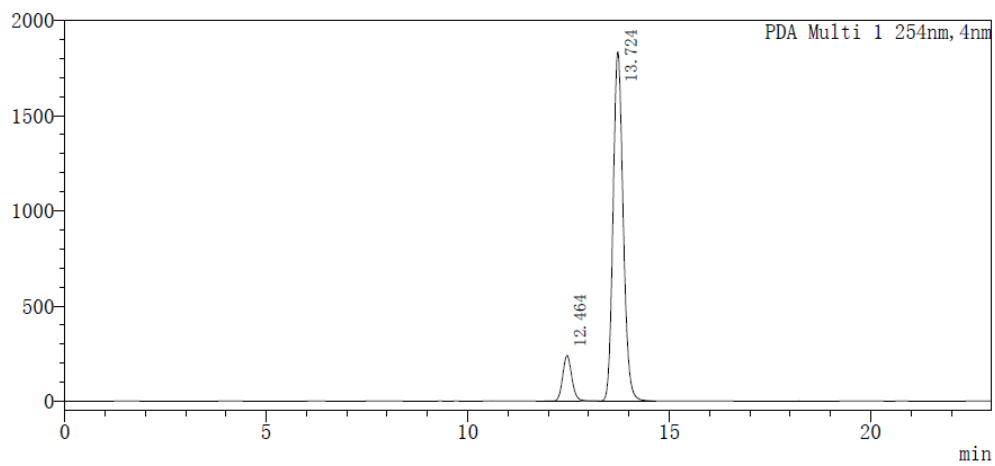

<Peak table>

PDA Ch1 254nm

| Peak# | Ret. Time | Height  | Area     | Area%   |
|-------|-----------|---------|----------|---------|
| 1     | 12.464    | 240153  | 3807595  | 10.663  |
| 2     | 13.724    | 1834956 | 31902134 | 89.337  |
| Total |           | 2075109 | 35709730 | 100.000 |

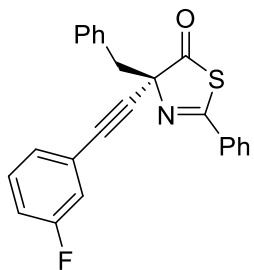

**4ag**

7.80  
7.78  
7.77  
7.77  
7.54  
7.52  
7.52  
7.48  
7.47  
7.46  
7.45  
7.44  
7.27  
7.26  
7.25  
7.25  
7.23  
7.22  
7.21  
7.21  
7.17  
7.15  
7.04  
3.68  
3.63  
3.50  
3.47

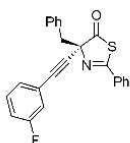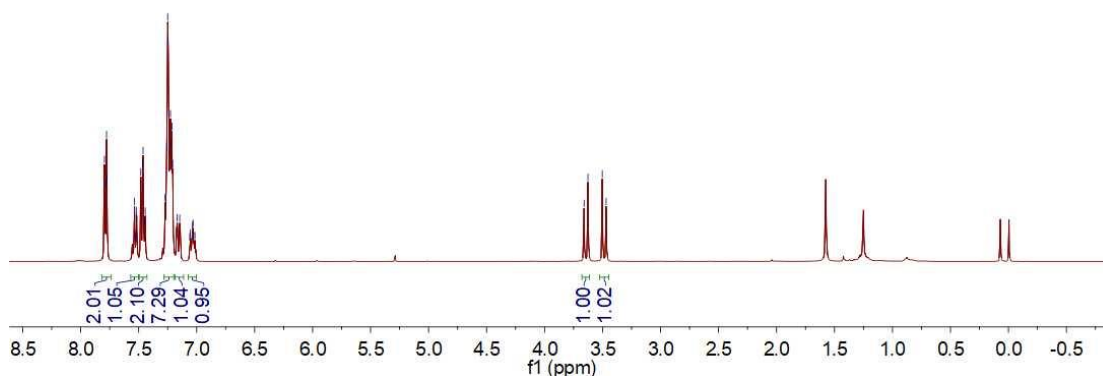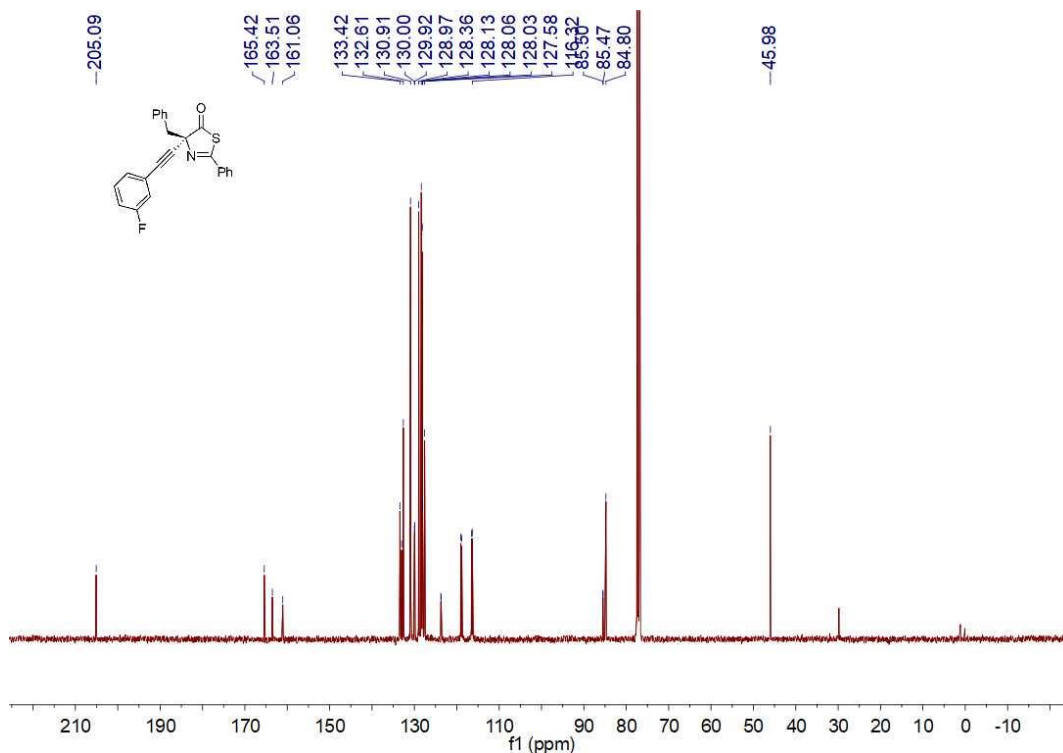



**4ag**

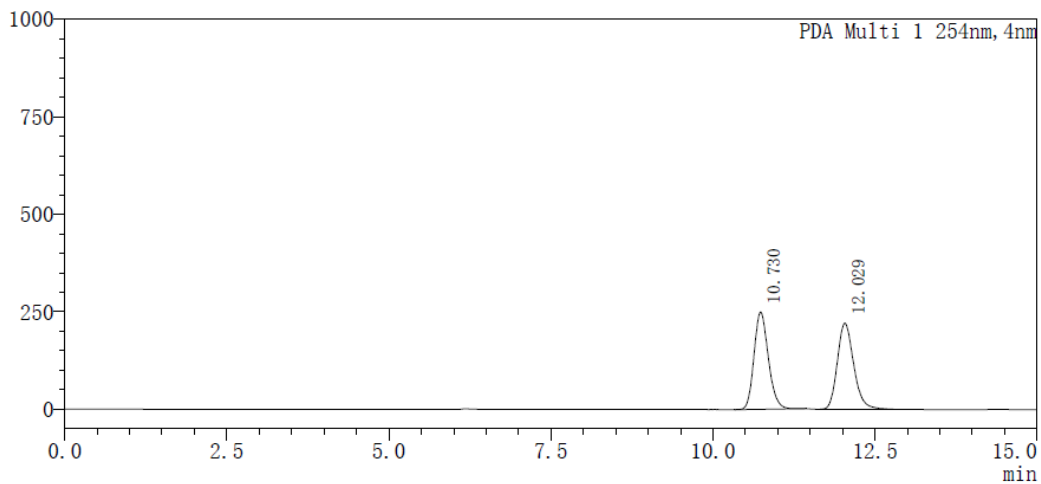

<Peak table>

PDA Ch1 254nm

| Peak# | Ret. Time | Height | Area    | Area%   |
|-------|-----------|--------|---------|---------|
| 1     | 10.730    | 249045 | 3843810 | 49.624  |
| 2     | 12.029    | 221222 | 3902125 | 50.376  |
| Total |           | 470267 | 7745934 | 100.000 |

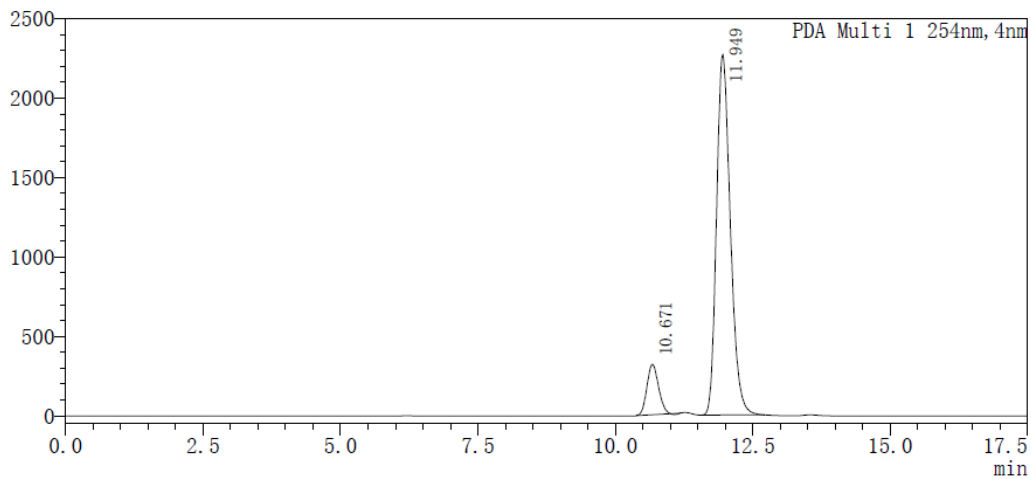

<Peak table>

PDA Ch1 254nm

| Peak# | Ret. Time | Height  | Area     | Area%   |
|-------|-----------|---------|----------|---------|
| 1     | 10.671    | 317377  | 4630061  | 10.416  |
| 2     | 11.949    | 2269576 | 39820404 | 89.584  |
| Total |           | 2586953 | 44450465 | 100.000 |

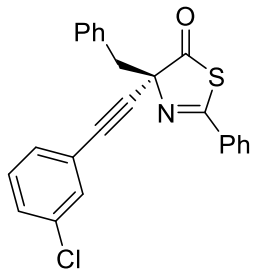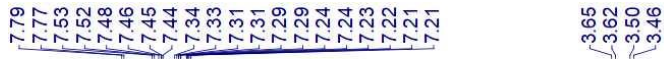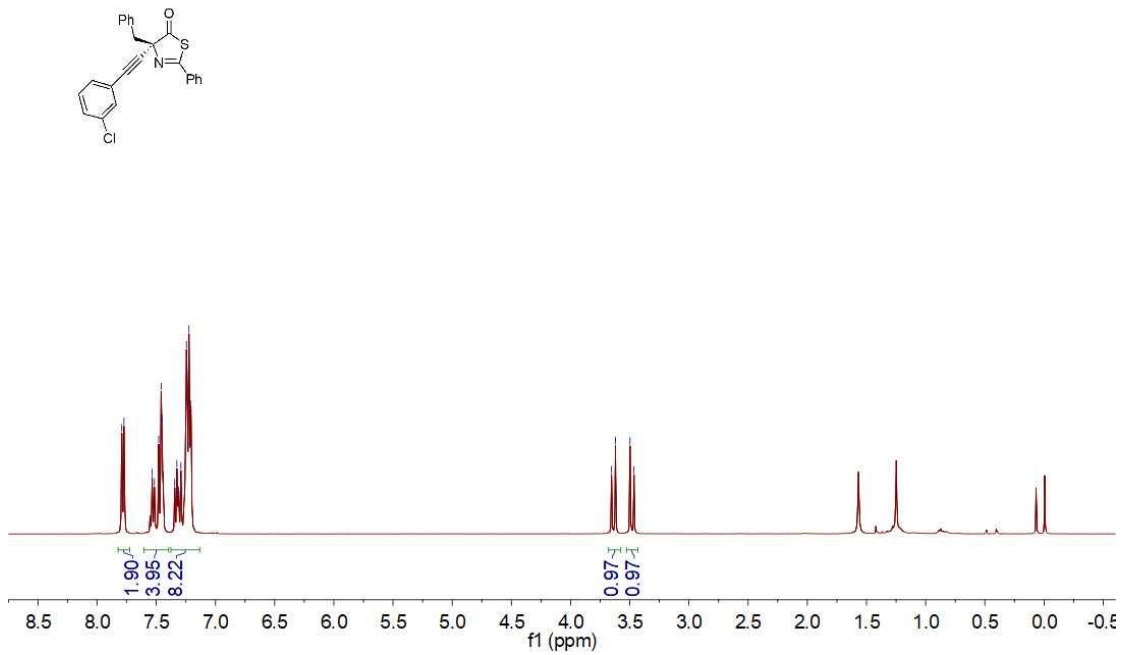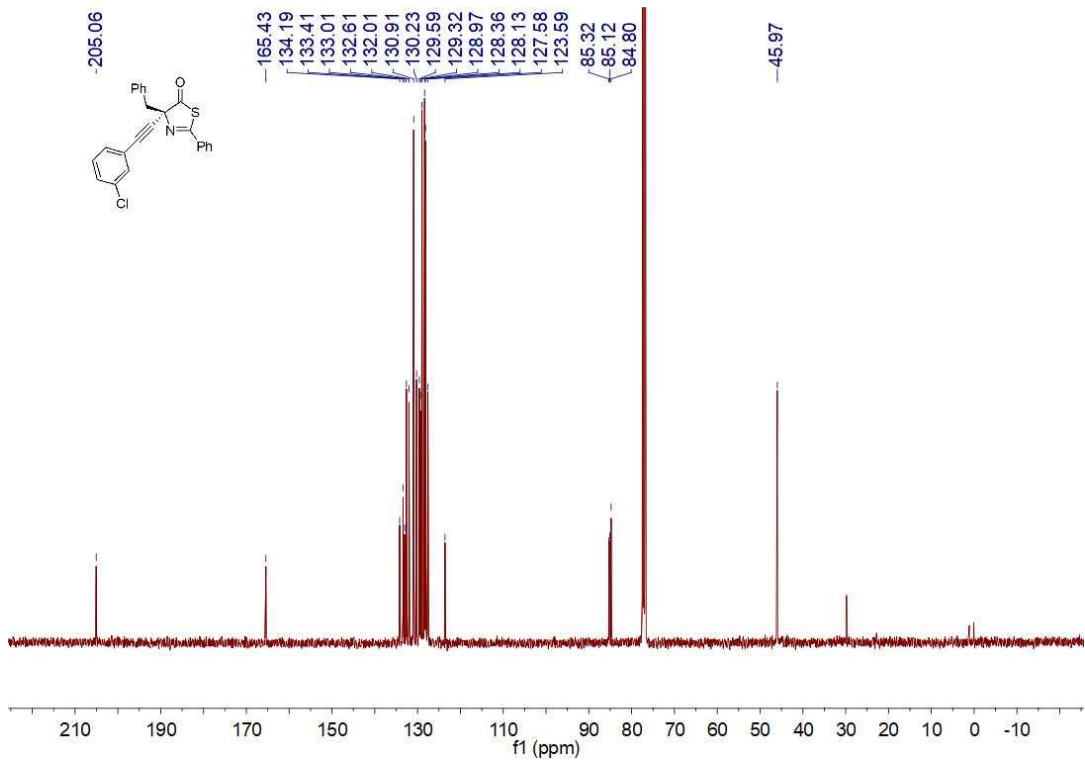

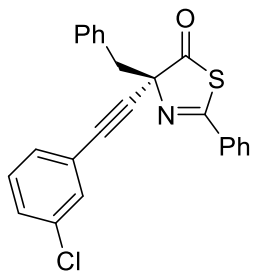

**4ah**

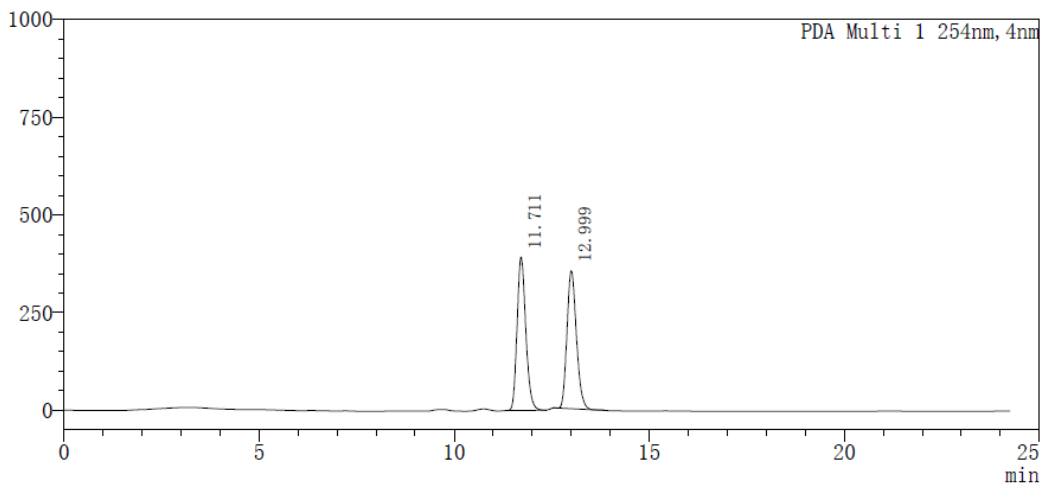

<Peak table>

PDA Ch1 254nm

| Peak# | Ret. Time | Height | Area     | Area%   |
|-------|-----------|--------|----------|---------|
| 1     | 11.711    | 392046 | 6102226  | 50.546  |
| 2     | 12.999    | 352812 | 5970506  | 49.454  |
| Total |           | 744858 | 12072732 | 100.000 |

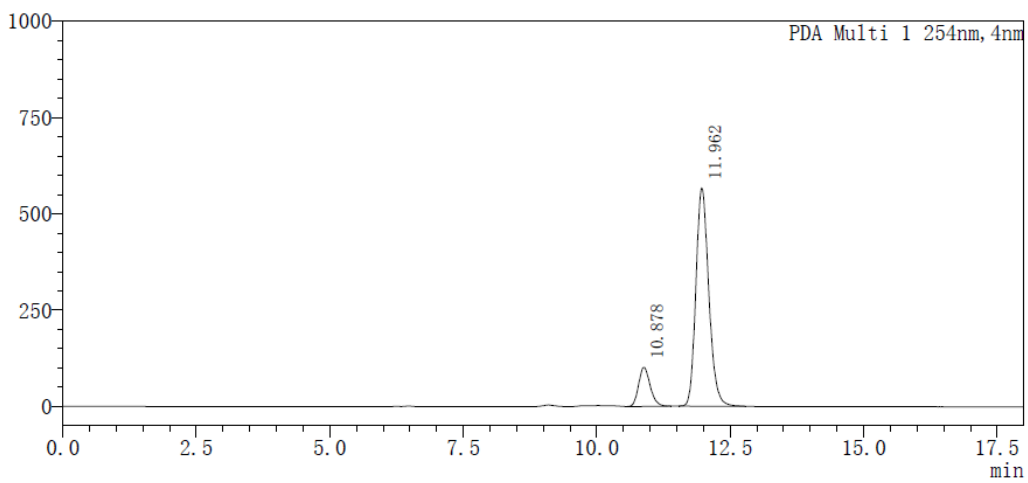

<Peak table>

PDA Ch1 254nm

| Peak# | Ret. Time | Height | Area     | Area%   |
|-------|-----------|--------|----------|---------|
| 1     | 10.878    | 101462 | 1534171  | 13.862  |
| 2     | 11.962    | 565768 | 9533340  | 86.138  |
| Total |           | 667229 | 11067511 | 100.000 |

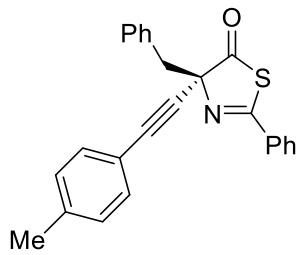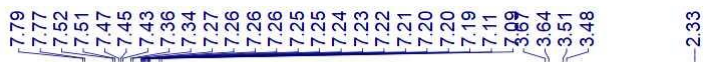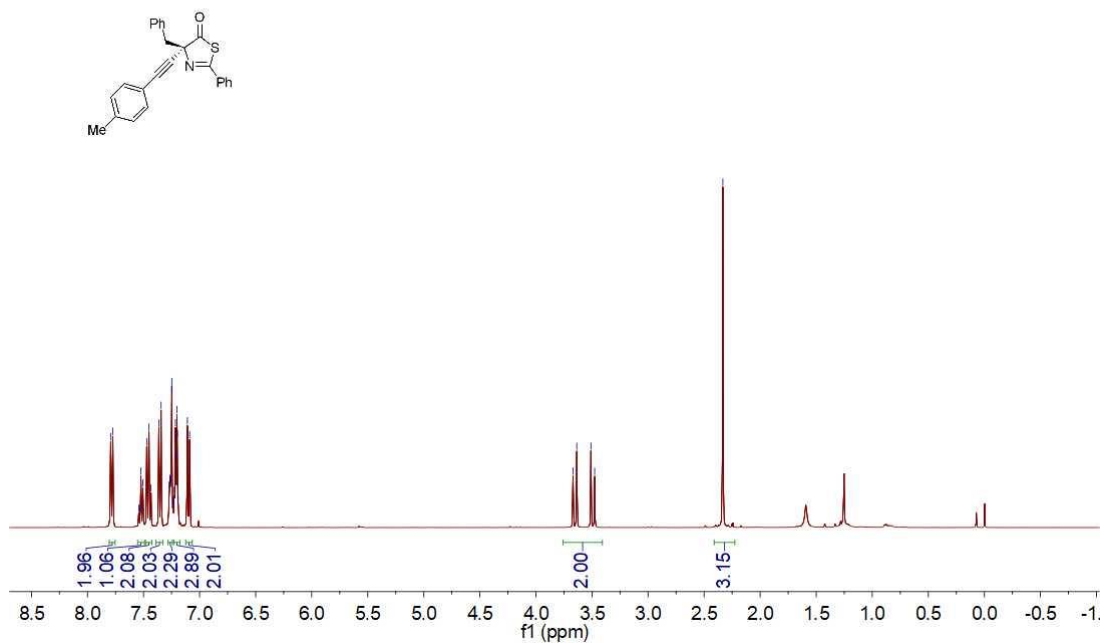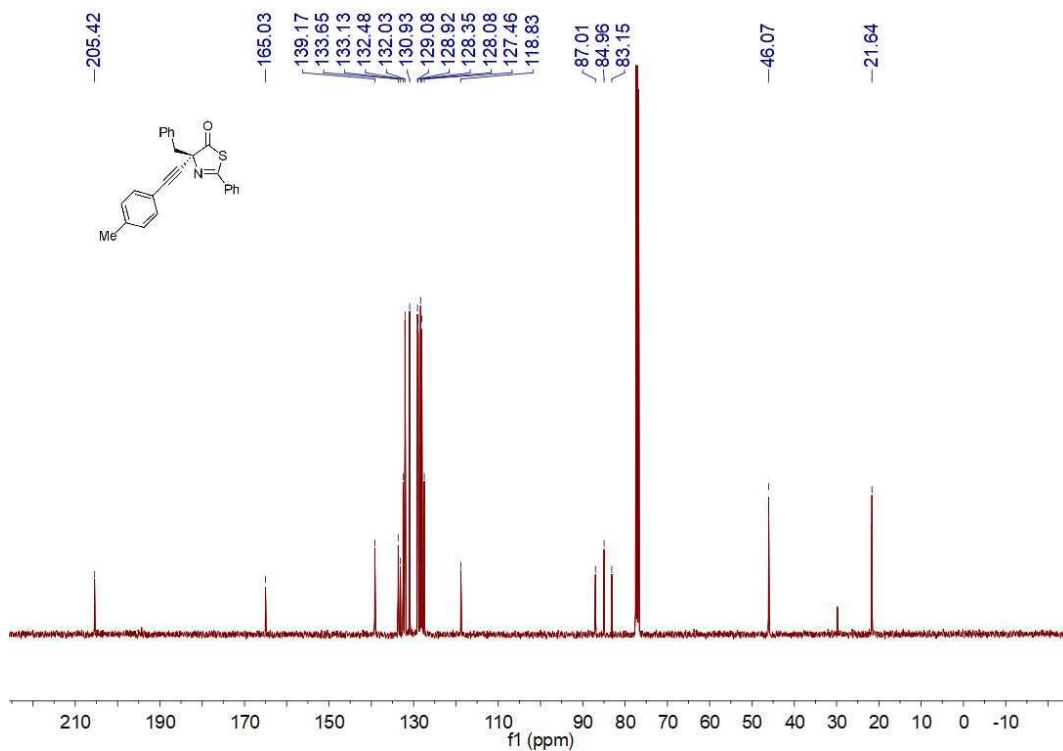

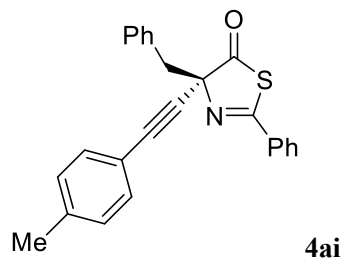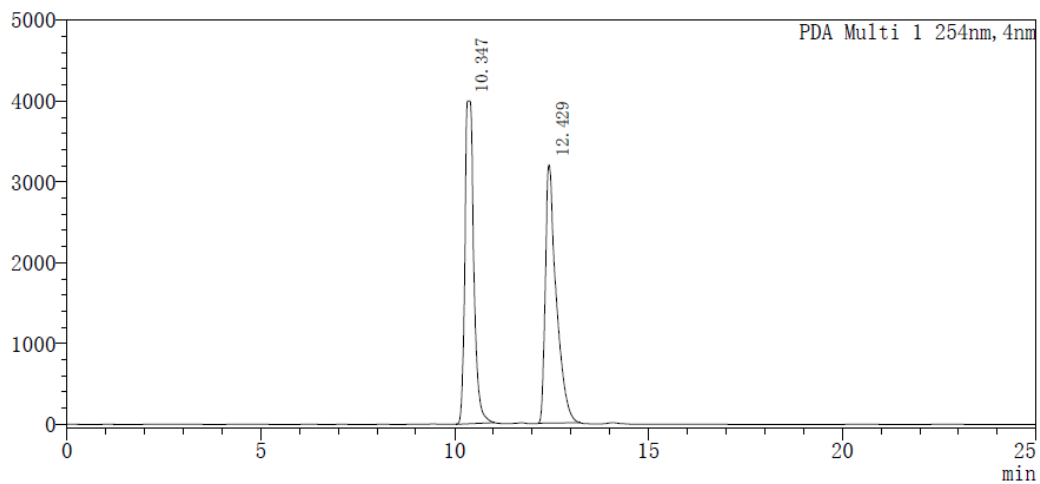

<Peak table>

PDA Ch1 254nm

| Peak# | Ret. Time | Height  | Area      | Area%   |
|-------|-----------|---------|-----------|---------|
| 1     | 10.347    | 3990813 | 63741292  | 50.453  |
| 2     | 12.429    | 3193927 | 62597513  | 49.547  |
| Total |           | 7184740 | 126338804 | 100.000 |

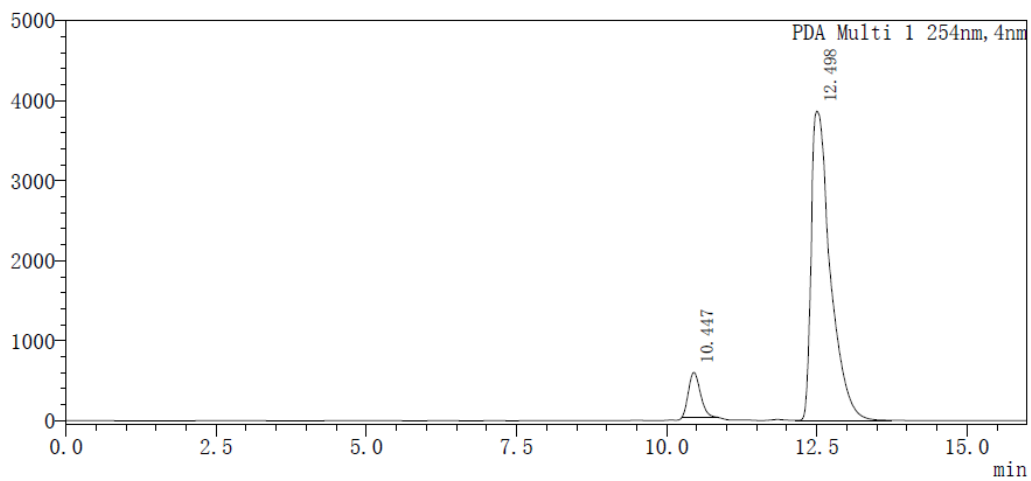

<Peak table>

PDA Ch1 254nm

| Peak# | Ret. Time | Height  | Area     | Area%   |
|-------|-----------|---------|----------|---------|
| 1     | 10.447    | 564735  | 7841266  | 8.382   |
| 2     | 12.498    | 3864440 | 85710931 | 91.618  |
| Total |           | 4429175 | 93552197 | 100.000 |



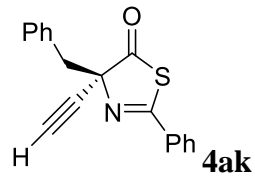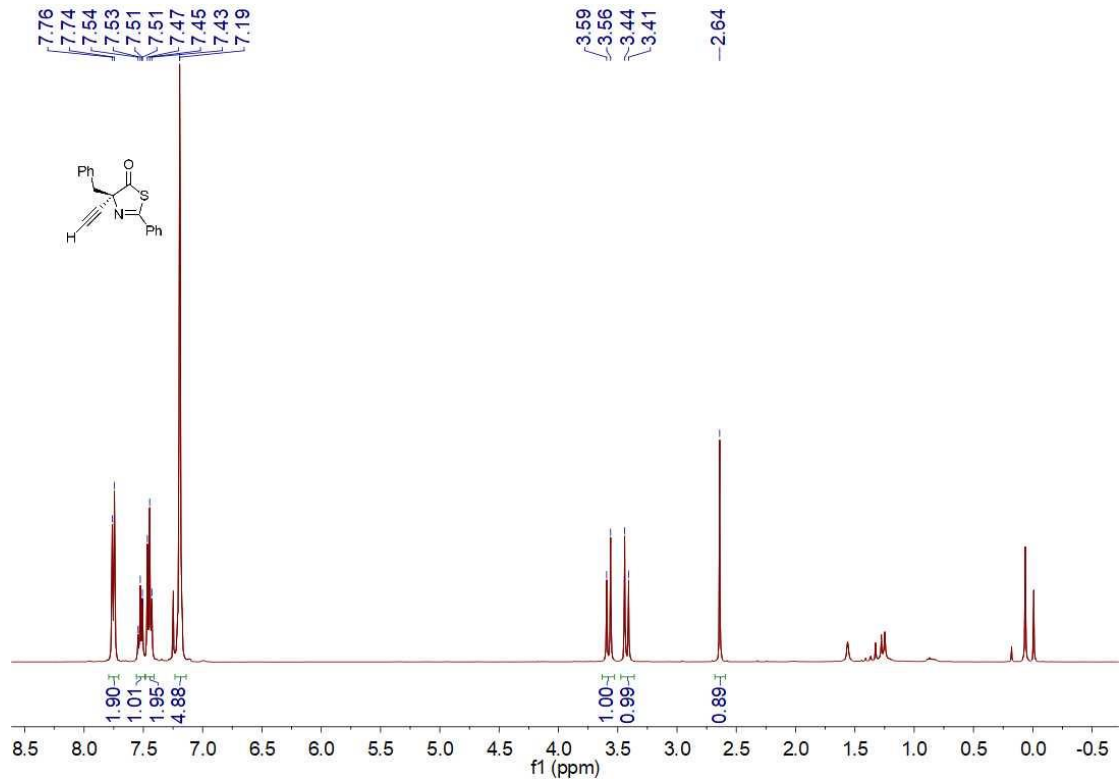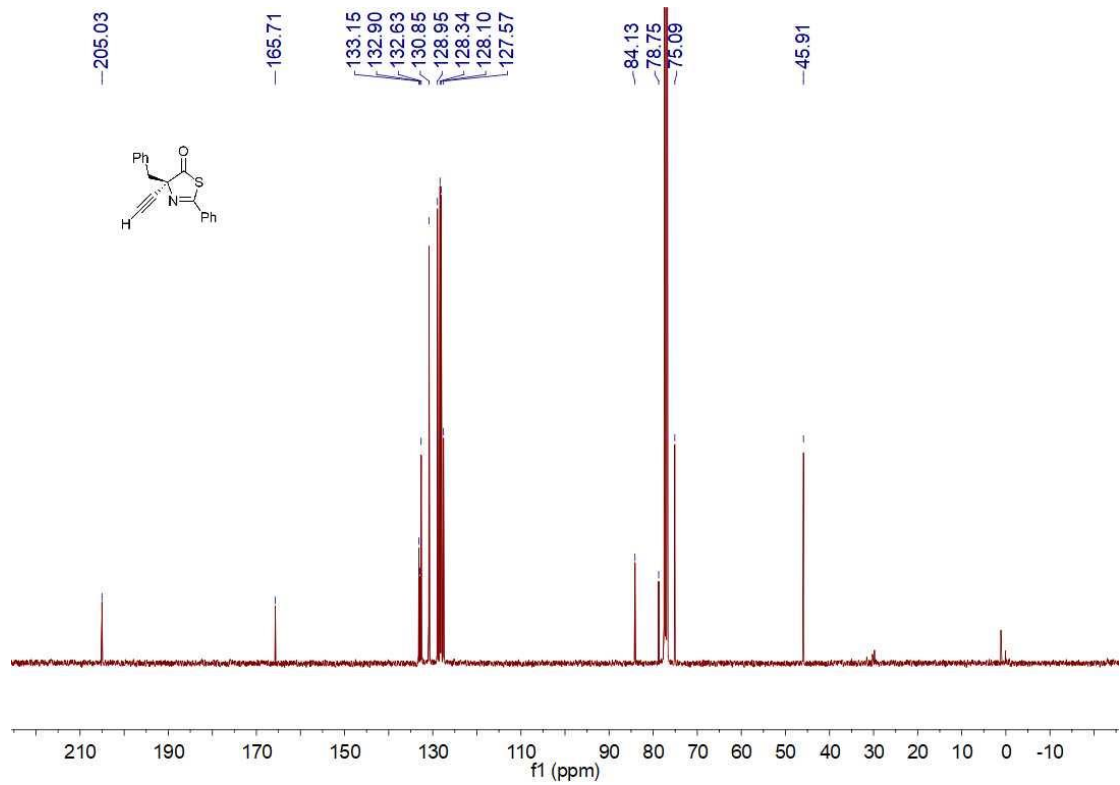

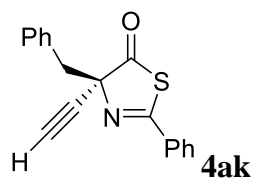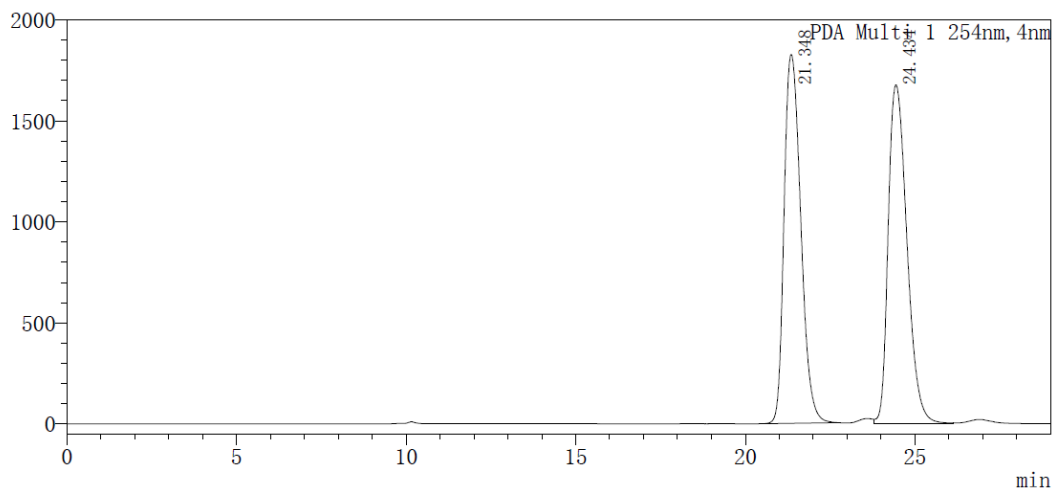

<Peak table>

PDA Ch1 254nm

| Peak# | Ret. Time | Height  | Area      | Area%   |
|-------|-----------|---------|-----------|---------|
| 1     | 21.348    | 1826958 | 62549325  | 49.240  |
| 2     | 24.434    | 1678753 | 64480773  | 50.760  |
| Total |           | 3505711 | 127030097 | 100.000 |

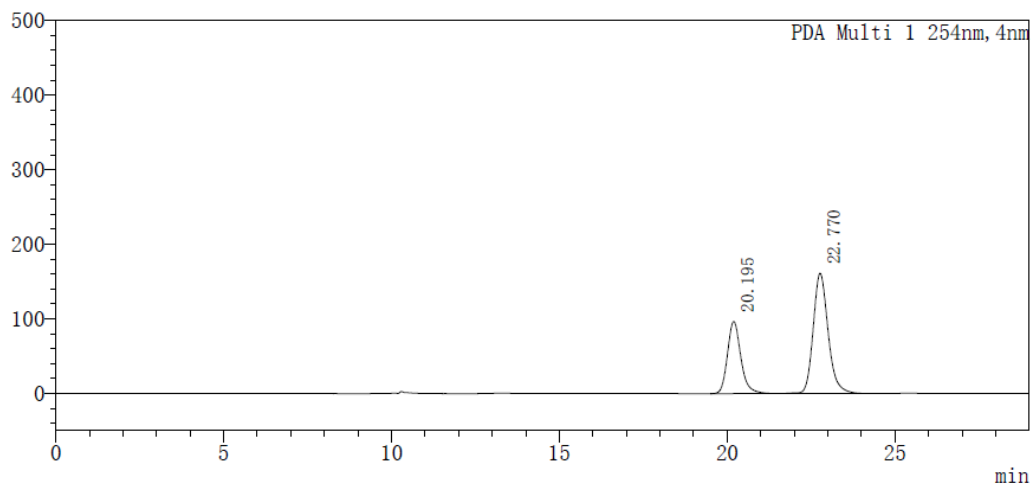

<Peak table>

PDA Ch1 254nm

| Peak# | Ret. Time | Height | Area    | Area%   |
|-------|-----------|--------|---------|---------|
| 1     | 20.195    | 96699  | 2681626 | 34.920  |
| 2     | 22.770    | 161243 | 4997624 | 65.080  |
| Total |           | 257942 | 7679250 | 100.000 |

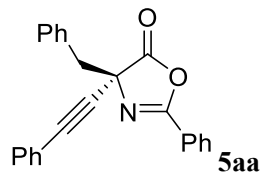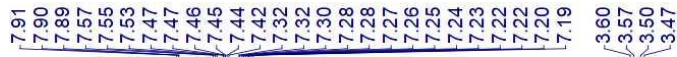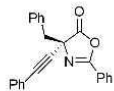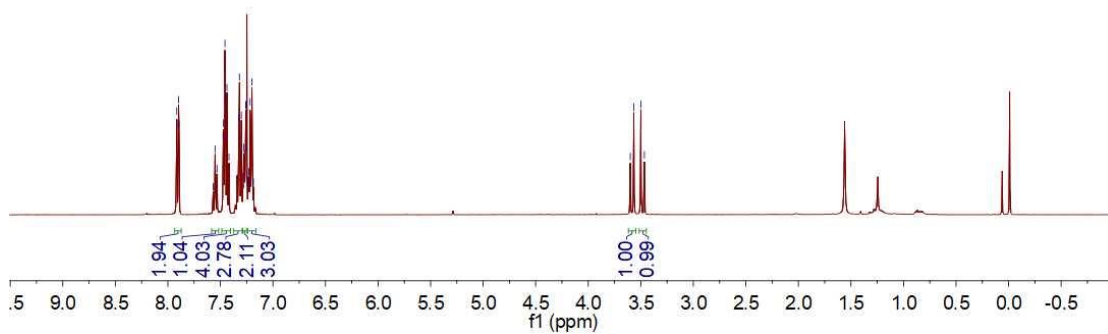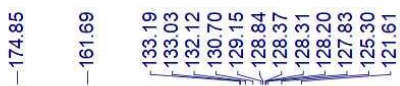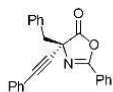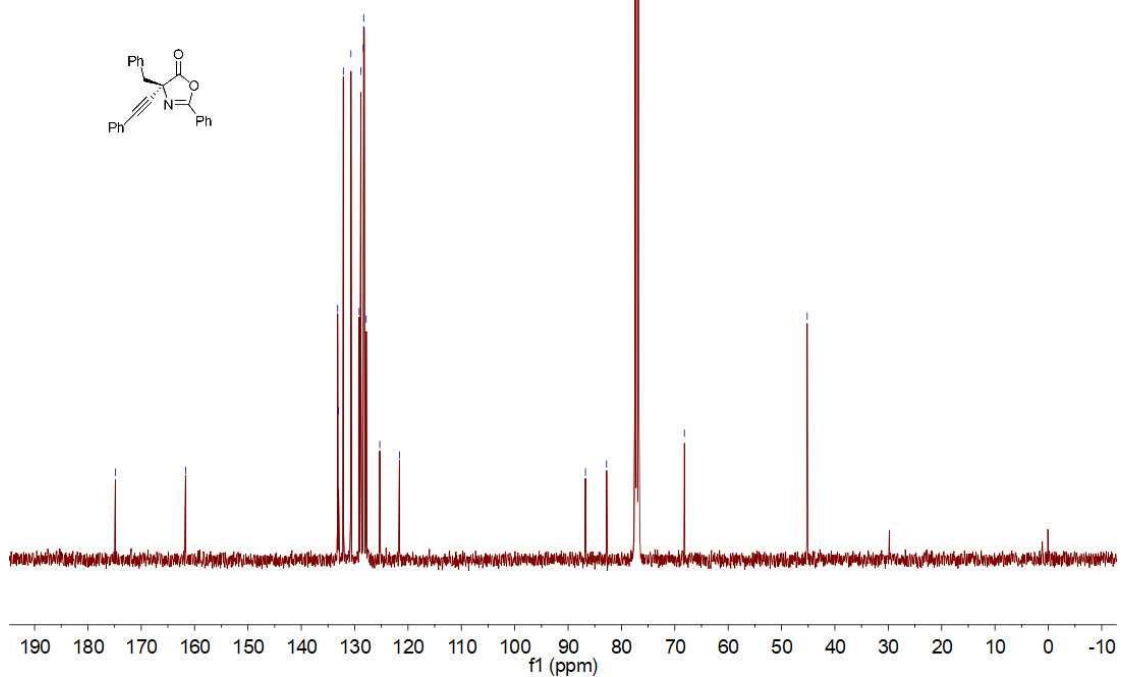

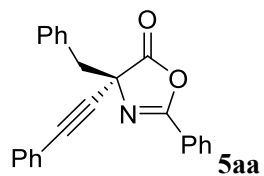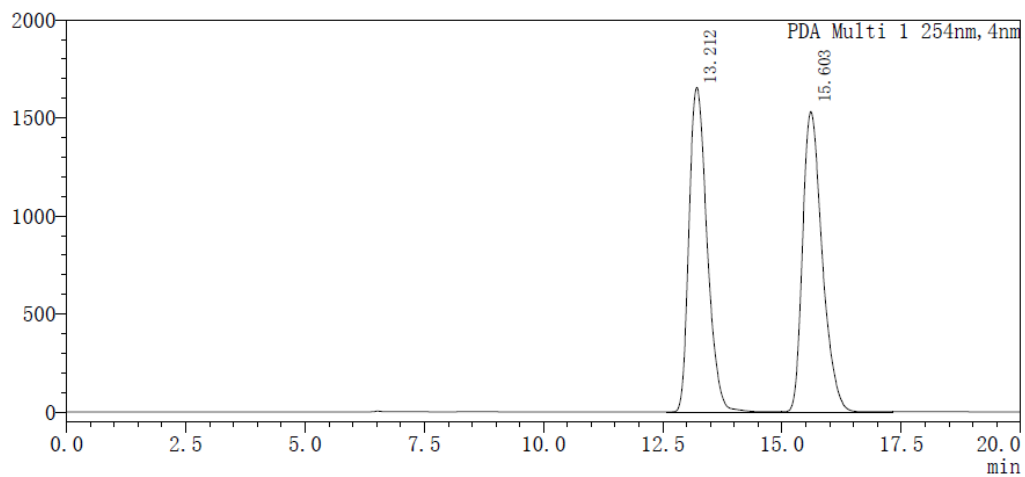

<Peak table>

PDA Ch1 254nm

| Peak# | Ret. Time | Height  | Area     | Area%   |
|-------|-----------|---------|----------|---------|
| 1     | 13.212    | 1656447 | 43691817 | 49.856  |
| 2     | 15.603    | 1532736 | 43944773 | 50.144  |
| Total |           | 3189183 | 87636590 | 100.000 |

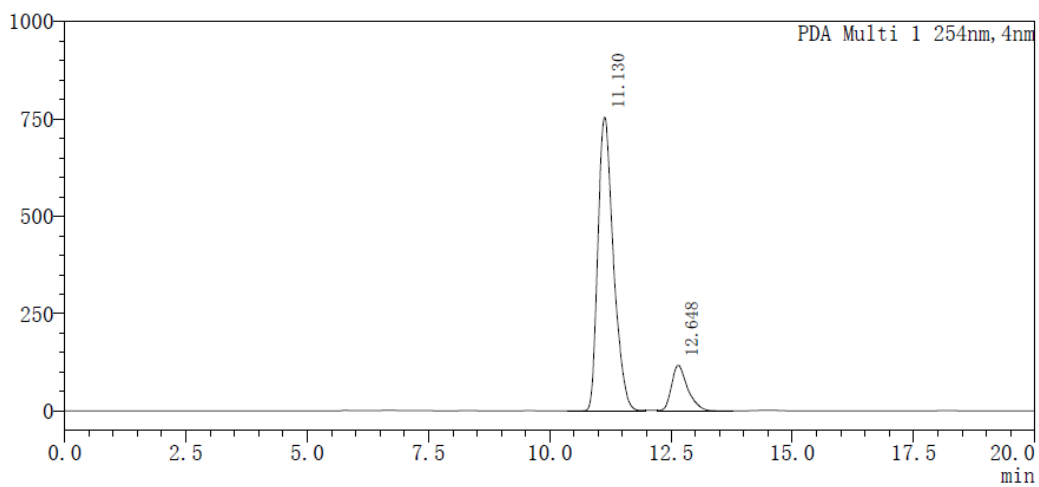

<Peak table>

PDA Ch1 254nm

| Peak# | Ret. Time | Height | Area     | Area%   |
|-------|-----------|--------|----------|---------|
| 1     | 11.130    | 754435 | 16820558 | 86.154  |
| 2     | 12.648    | 117168 | 2703311  | 13.846  |
| Total |           | 871602 | 19523868 | 100.000 |

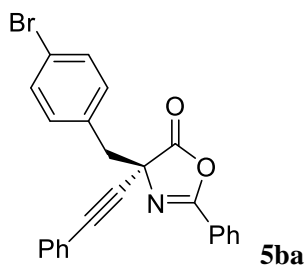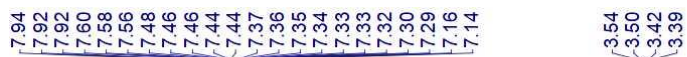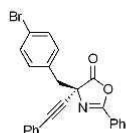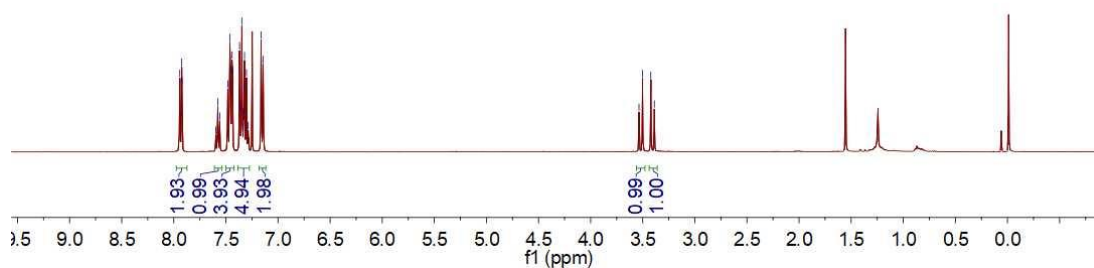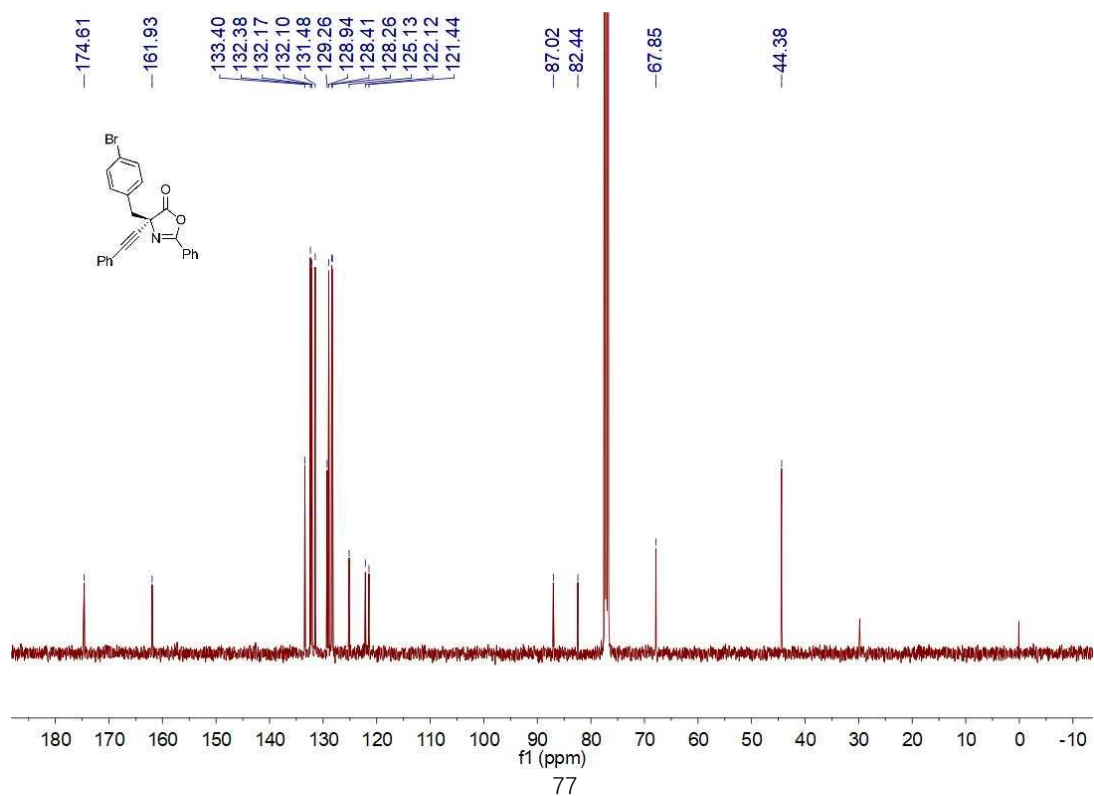

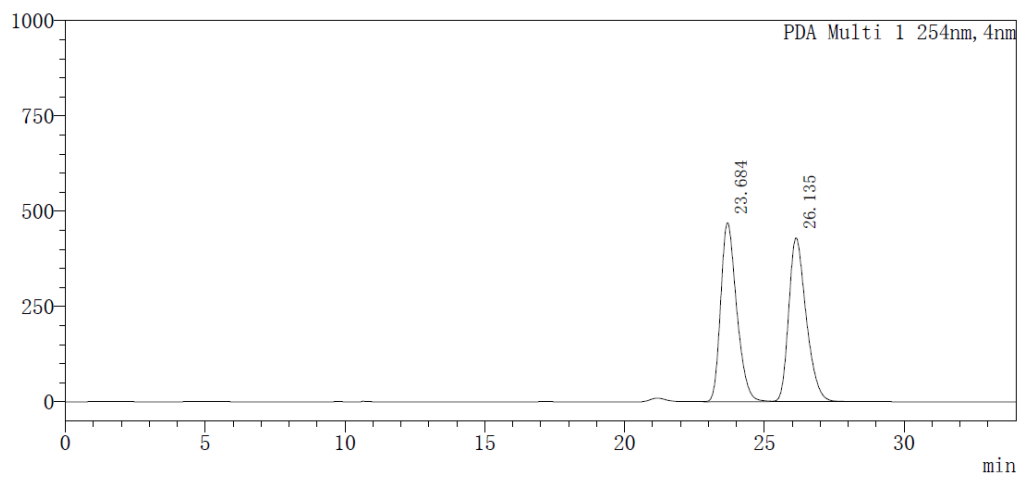

<Peak table>

PDA Ch1 254nm

| Peak# | Ret. Time | Height | Area     | Area%   |
|-------|-----------|--------|----------|---------|
| 1     | 23.684    | 469365 | 18736941 | 50.098  |
| 2     | 26.135    | 429459 | 18663418 | 49.902  |
| Total |           | 898825 | 37400359 | 100.000 |

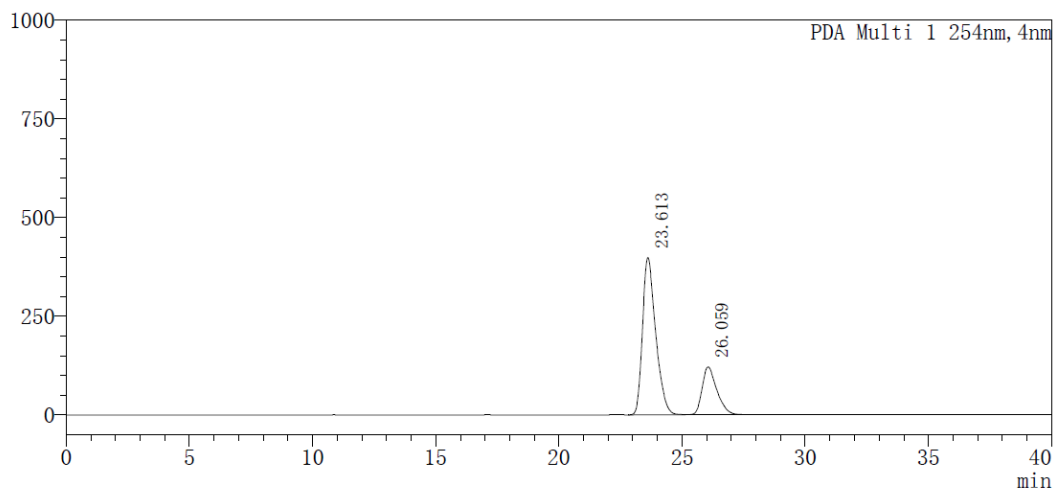

<Peak table>

PDA Ch1 254nm

| Peak# | Ret. Time | Height | Area     | Area%   |
|-------|-----------|--------|----------|---------|
| 1     | 23.613    | 398383 | 14821830 | 74.664  |
| 2     | 26.059    | 121287 | 5029604  | 25.336  |
| Total |           | 519669 | 19851433 | 100.000 |

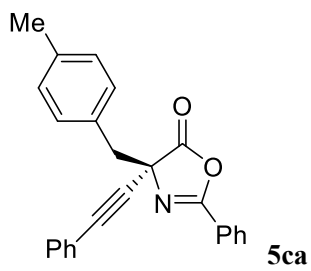

7.93, 7.91, 7.91, 7.57, 7.56, 7.56, 7.54, 7.48, 7.47, 7.46, 7.46, 7.45, 7.44, 7.43, 7.34, 7.33, 7.32, 7.32, 7.31, 7.30, 7.28, 7.15, 7.13, 7.02, 7.00, 3.56, 3.53, 3.46, 3.43, -2.24

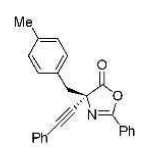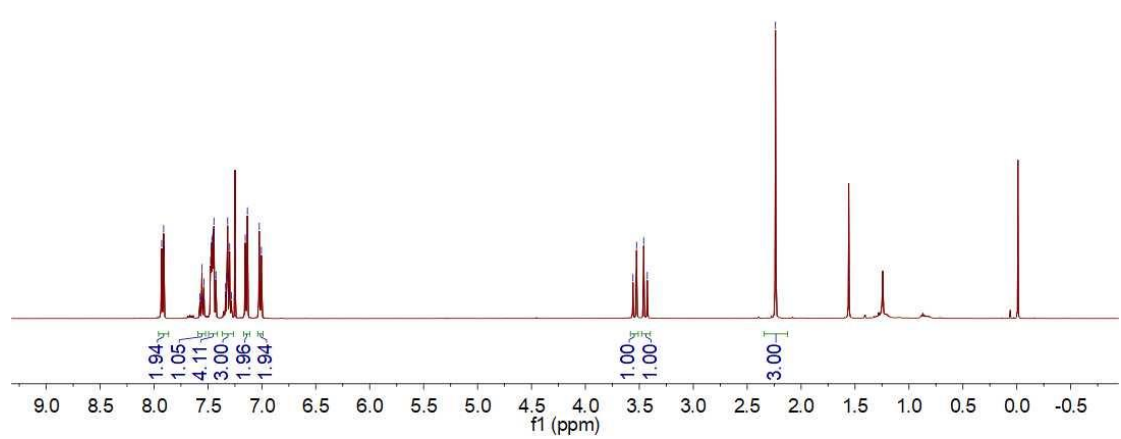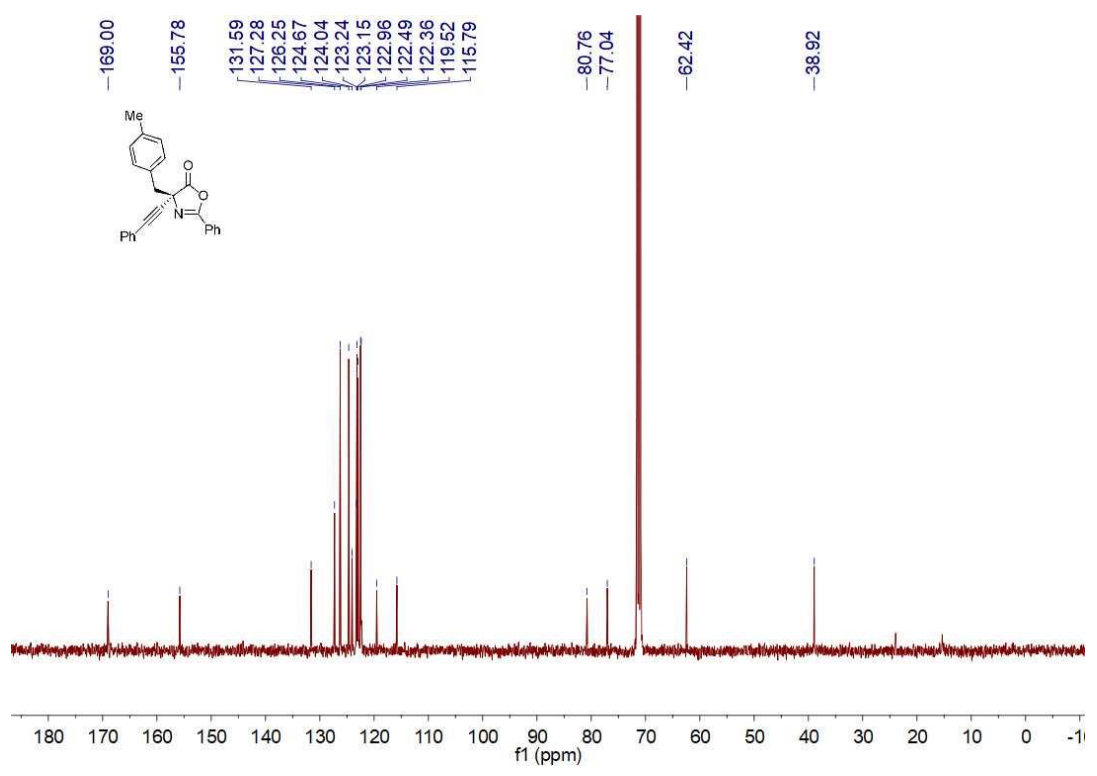

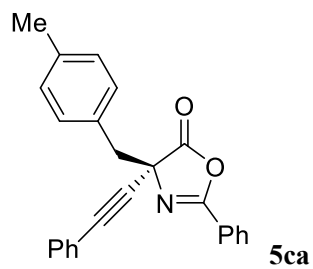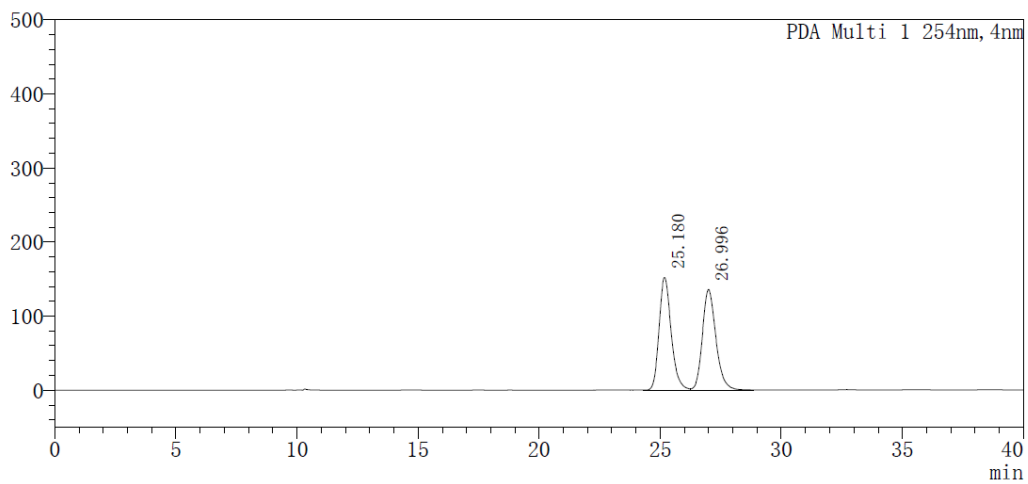

<Peak table>

PDA Ch1 254nm

| Peak# | Ret. Time | Height | Area     | Area%   |
|-------|-----------|--------|----------|---------|
| 1     | 25.180    | 152232 | 5284214  | 50.075  |
| 2     | 26.996    | 135697 | 5268333  | 49.925  |
| Total |           | 287929 | 10552547 | 100.000 |

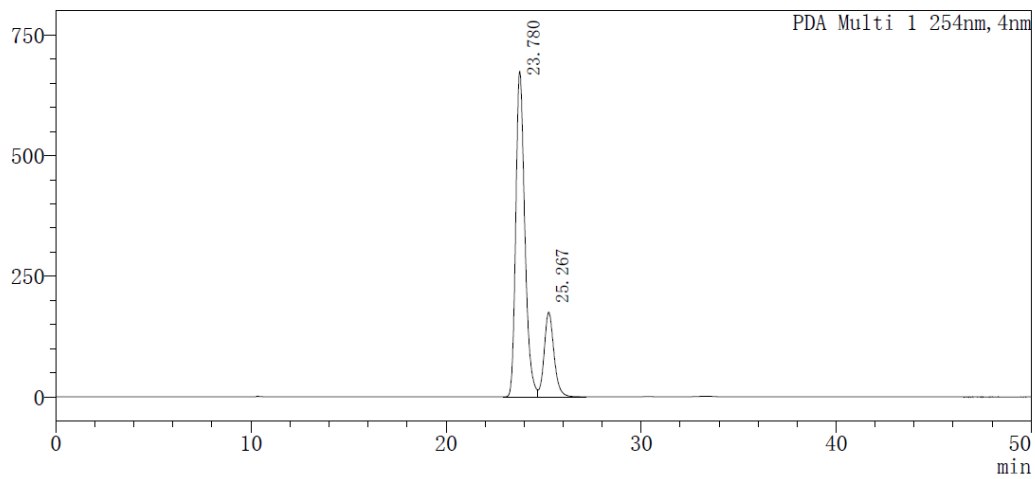

<Peak table>

PDA Ch1 254nm

| Peak# | Ret. Time | Height | Area     | Area%   |
|-------|-----------|--------|----------|---------|
| 1     | 23.780    | 674450 | 21806539 | 78.051  |
| 2     | 25.267    | 175395 | 6132331  | 21.949  |
| Total |           | 849844 | 27938870 | 100.000 |



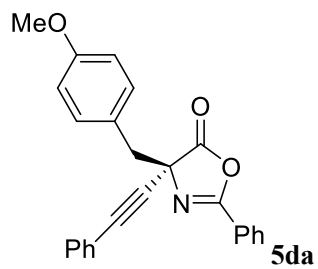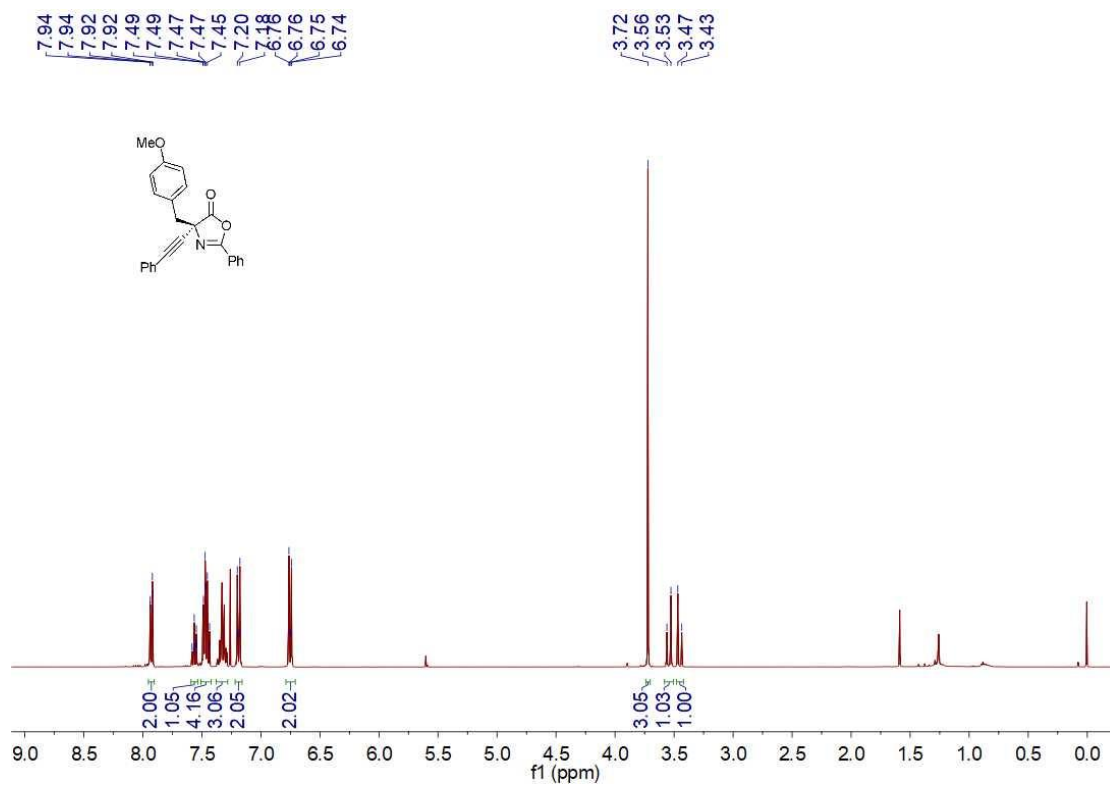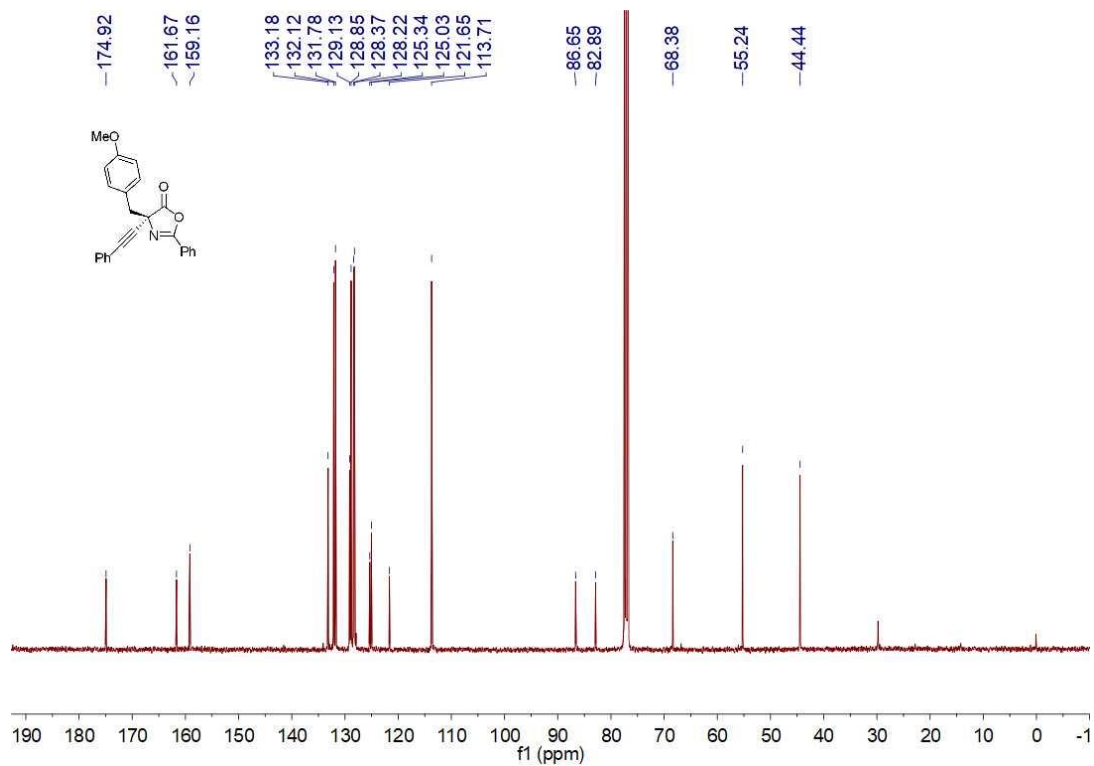

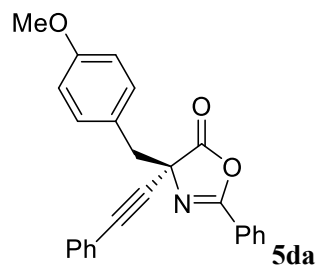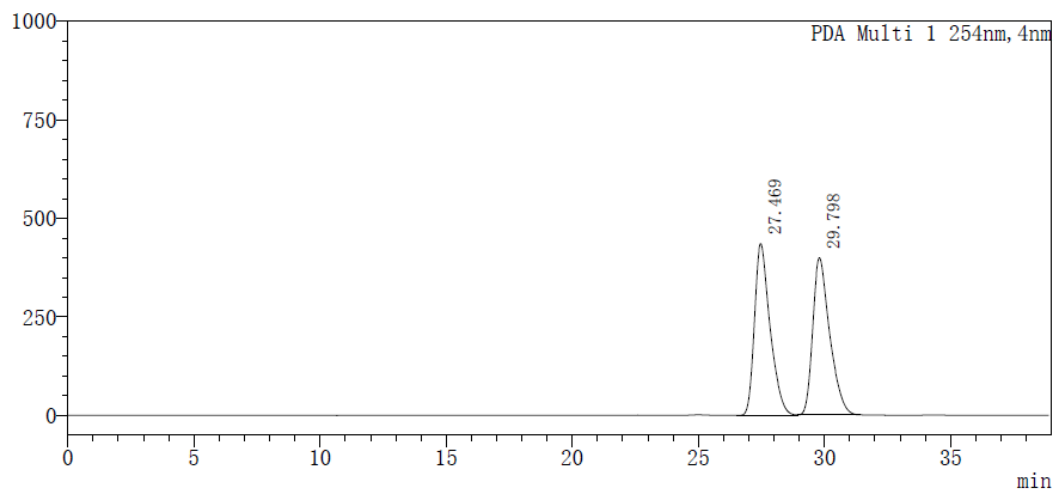

<Peak table>

PDA Ch1 254nm

| Peak# | Ret. Time | Height | Area     | Area%   |
|-------|-----------|--------|----------|---------|
| 1     | 27.469    | 436101 | 18791482 | 50.190  |
| 2     | 29.798    | 398389 | 18649292 | 49.810  |
| Total |           | 834491 | 37440774 | 100.000 |

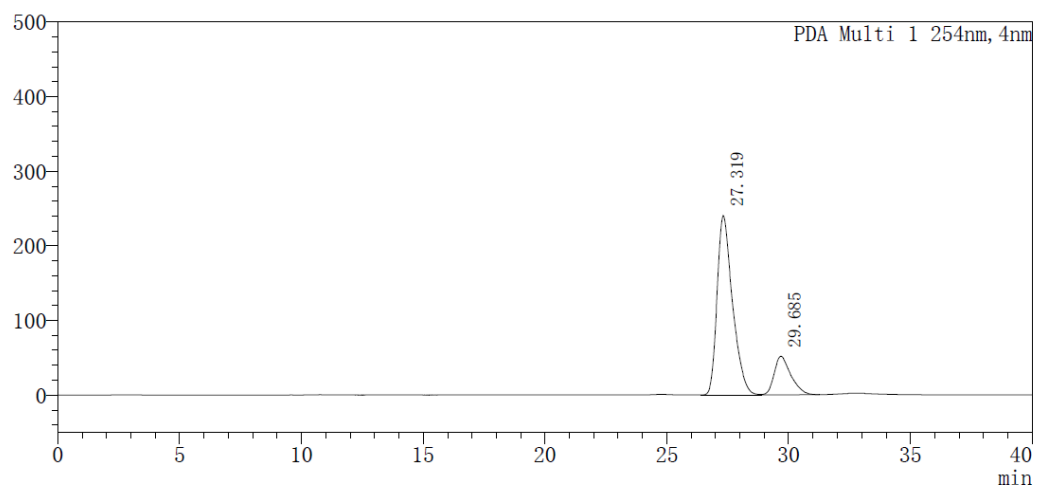

<Peak table>

PDA Ch1 254nm

| Peak# | Ret. Time | Height | Area     | Area%   |
|-------|-----------|--------|----------|---------|
| 1     | 27.319    | 240371 | 10583808 | 81.270  |
| 2     | 29.685    | 51481  | 2439208  | 18.730  |
| Total |           | 291853 | 13023016 | 100.000 |

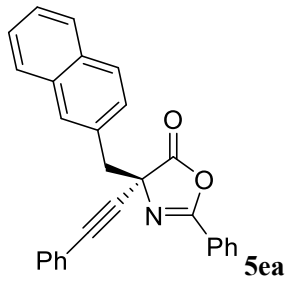

7.90  
7.89  
7.88  
7.75  
7.70  
7.68  
7.54  
7.52  
7.51  
7.47  
7.46  
7.43  
7.42  
7.41  
7.40  
7.34  
7.32  
7.31  
7.30

3.77  
3.74  
3.66  
3.63

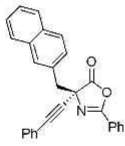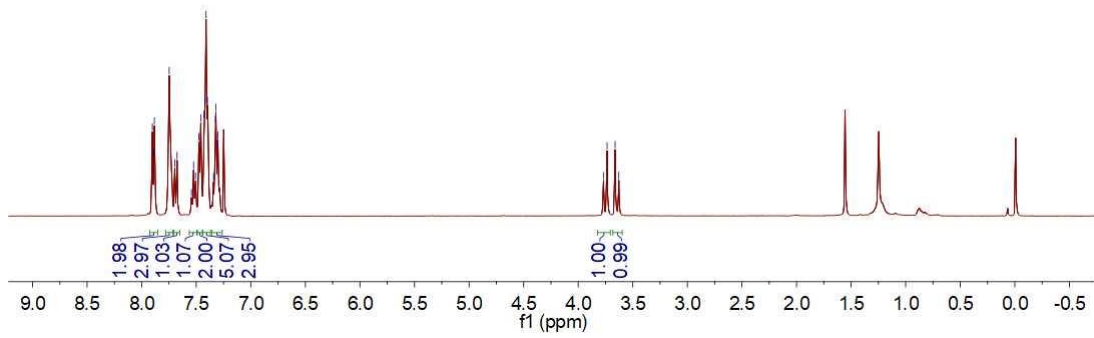

-174.83  
 -161.84  
 -133.25  
 -133.20  
 -132.80  
 -132.13  
 -130.71  
 -129.83  
 -129.17  
 -128.82  
 -128.55  
 -128.38  
 -128.23  
 -127.99  
 -127.80  
 -127.65  
 -126.08  
 -126.05  
 -125.25  
 -121.60  
 -86.87  
 -82.86  
 -68.34  
 -45.25

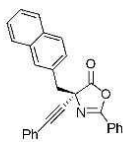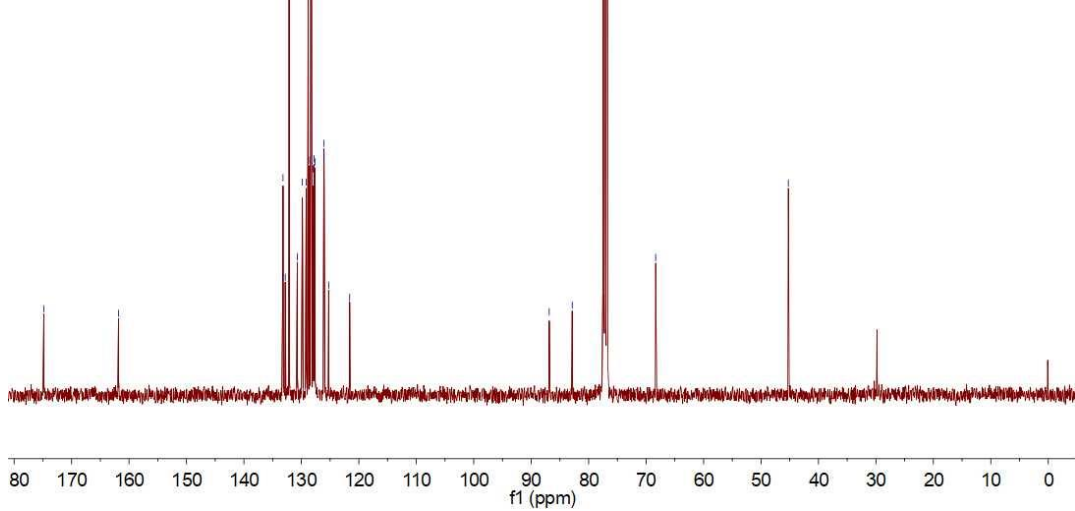

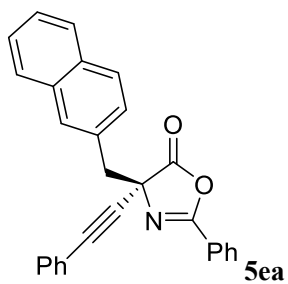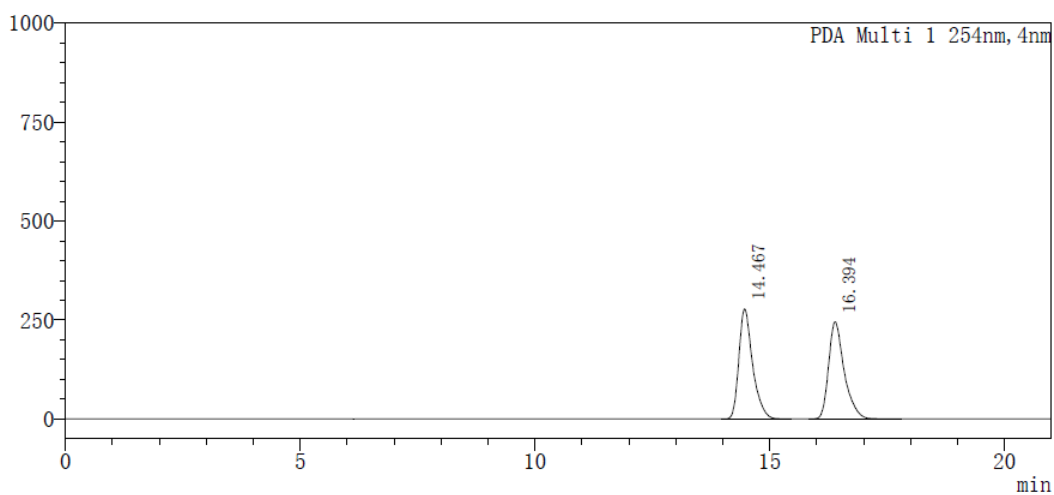

<Peak table>

PDA Ch1 254nm

| Peak# | Ret. Time | Height | Area     | Area%   |
|-------|-----------|--------|----------|---------|
| 1     | 14.467    | 277933 | 5673058  | 49.999  |
| 2     | 16.394    | 245132 | 5673182  | 50.001  |
| Total |           | 523066 | 11346240 | 100.000 |

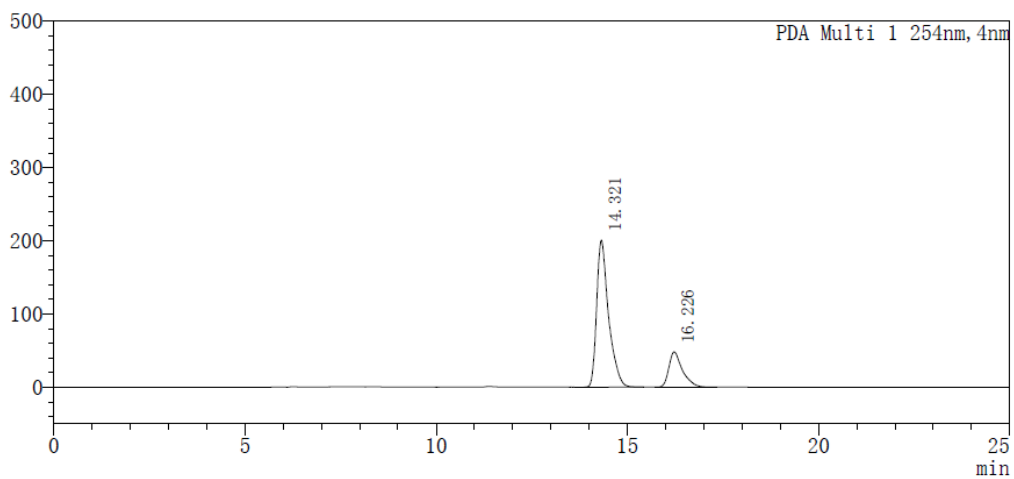

<Peak table>

PDA Ch1 254nm

| Peak# | Ret. Time | Height | Area    | Area%   |
|-------|-----------|--------|---------|---------|
| 1     | 14.321    | 200625 | 4345834 | 78.633  |
| 2     | 16.226    | 48078  | 1180919 | 21.367  |
| Total |           | 248703 | 5526753 | 100.000 |

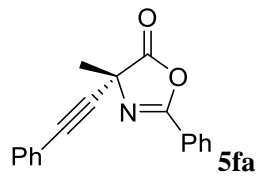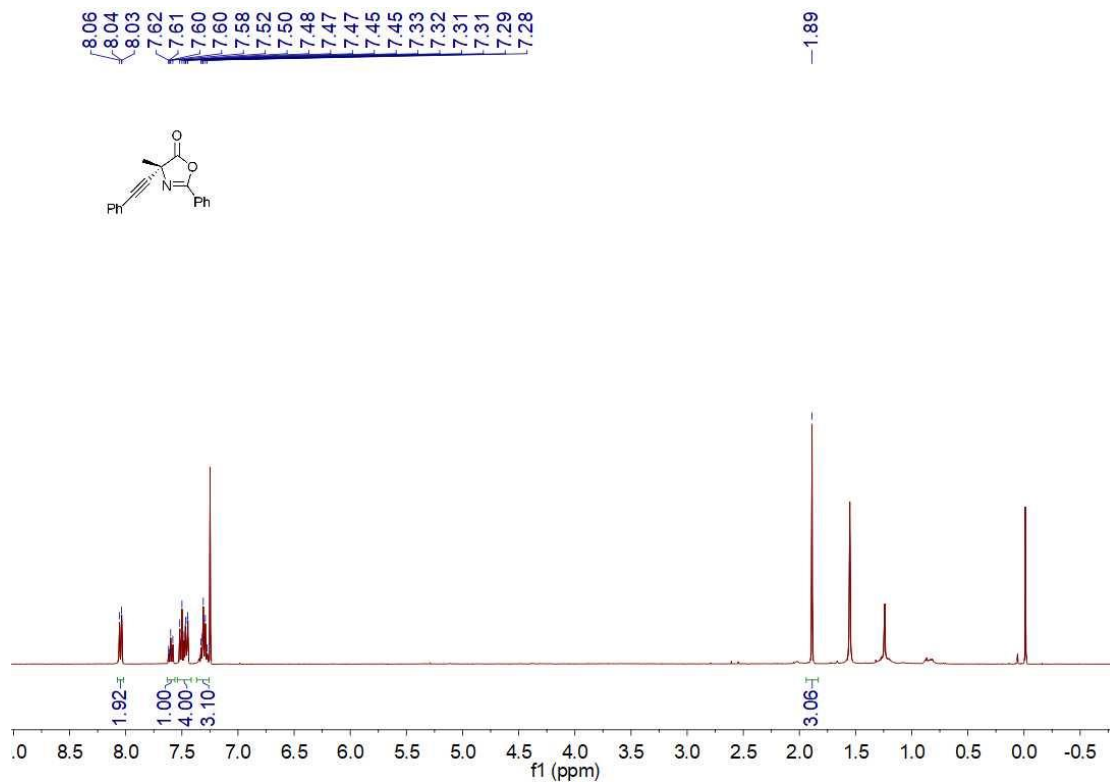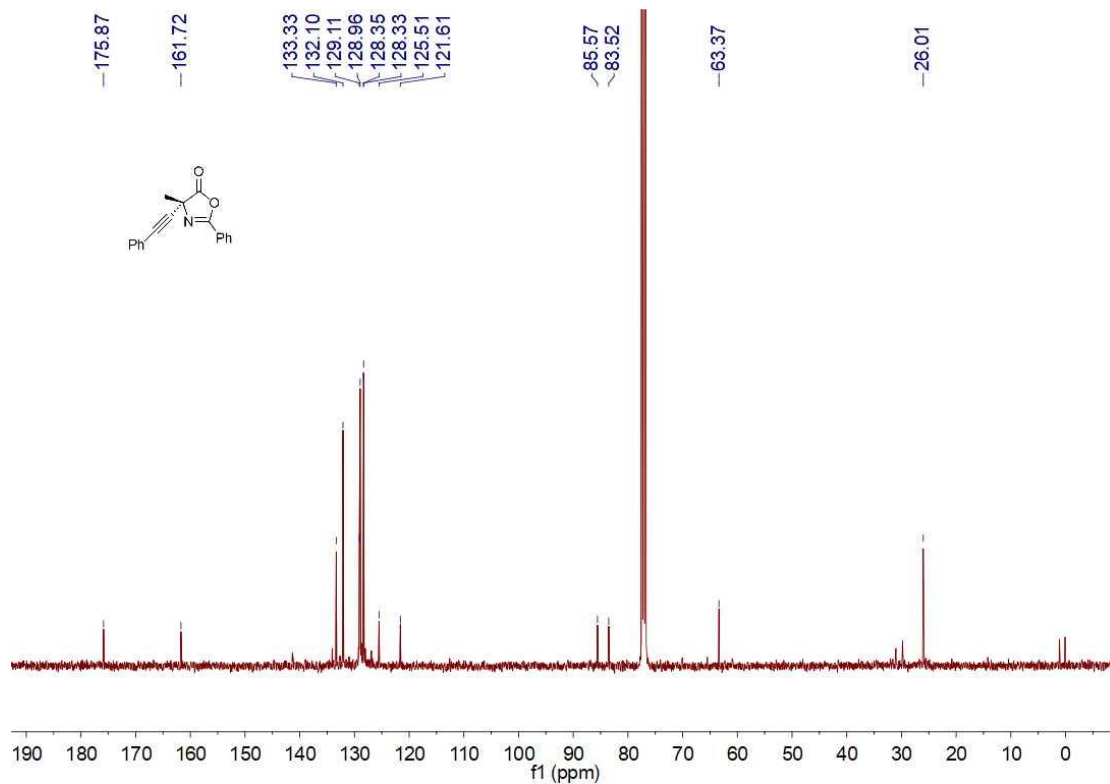

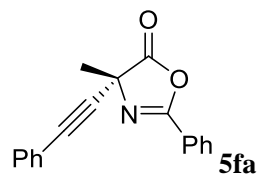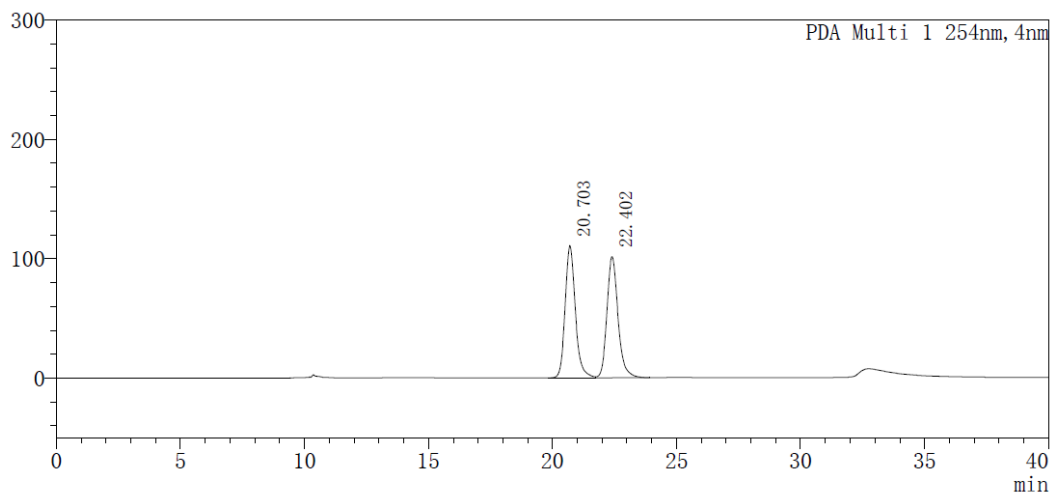

<Peak table>

PDA Ch1 254nm

| Peak# | Ret. Time | Height | Area    | Area%   |
|-------|-----------|--------|---------|---------|
| 1     | 20.703    | 110672 | 3185423 | 50.227  |
| 2     | 22.402    | 101460 | 3156611 | 49.773  |
| Total |           | 212132 | 6342033 | 100.000 |

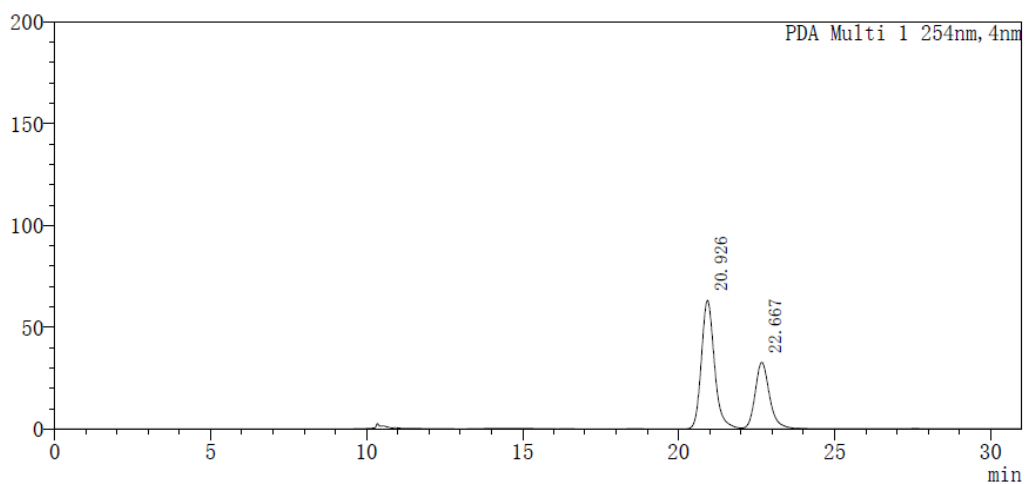

<Peak table>

PDA Ch1 254nm

| Peak# | Ret. Time | Height | Area    | Area%   |
|-------|-----------|--------|---------|---------|
| 1     | 20.926    | 63147  | 1846162 | 63.863  |
| 2     | 22.667    | 32635  | 1044655 | 36.137  |
| Total |           | 95782  | 2890817 | 100.000 |

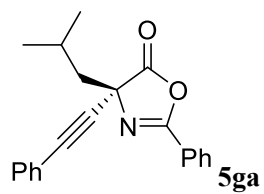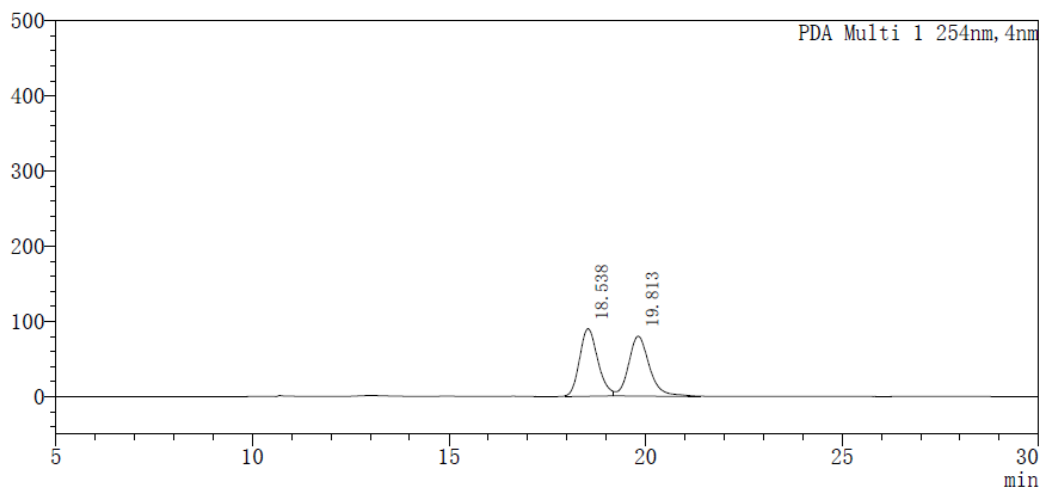

<Peak table>

PDA Ch1 254nm

| Peak# | Ret. Time | Height | Area    | Area%   |
|-------|-----------|--------|---------|---------|
| 1     | 18.538    | 89872  | 2905571 | 49.615  |
| 2     | 19.813    | 79756  | 2950628 | 50.385  |
| Total |           | 169628 | 5856199 | 100.000 |

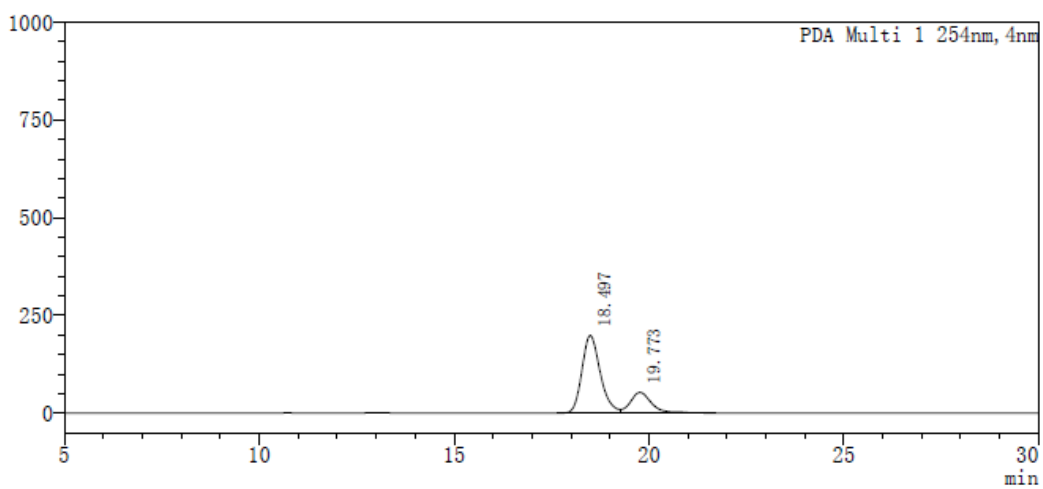

<Peak table>

PDA Ch1 254nm

| Peak# | Ret. Time | Height | Area    | Area%   |
|-------|-----------|--------|---------|---------|
| 1     | 18.497    | 198607 | 6507368 | 76.271  |
| 2     | 19.773    | 53031  | 2024583 | 23.729  |
| Total |           | 251638 | 8531952 | 100.000 |

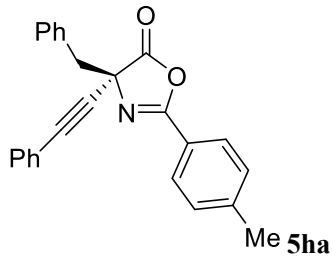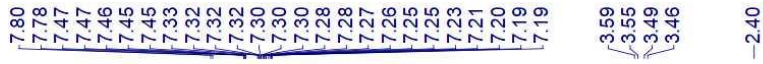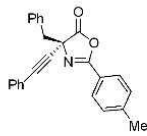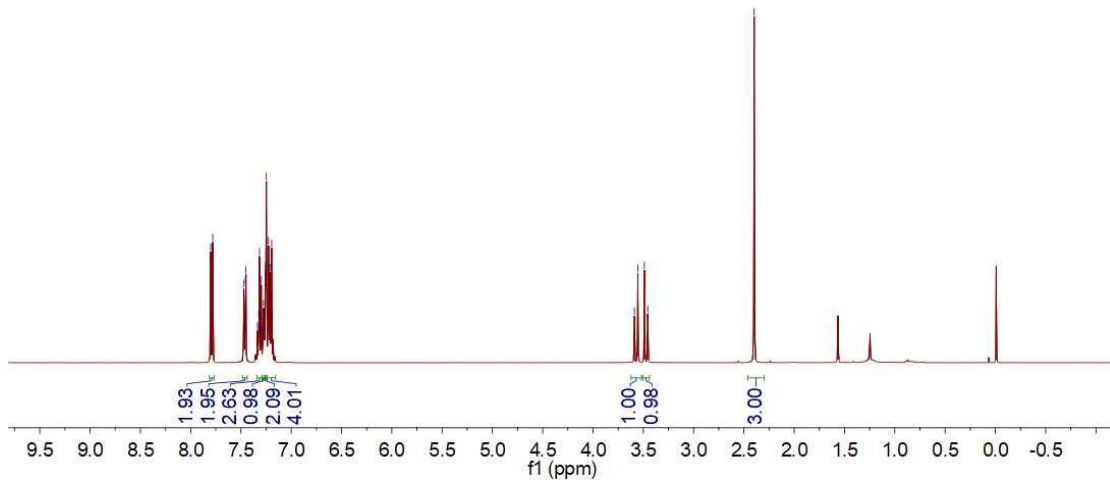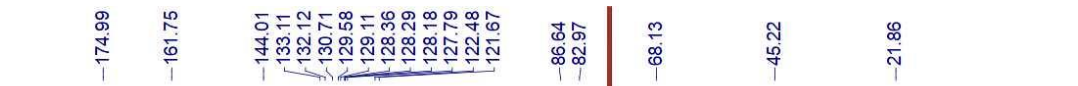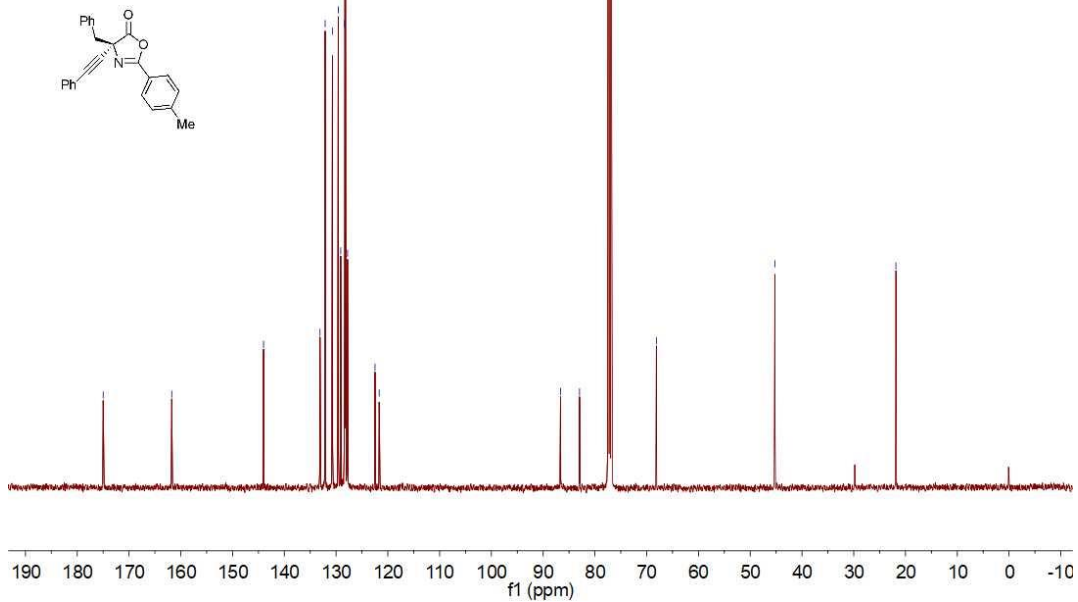



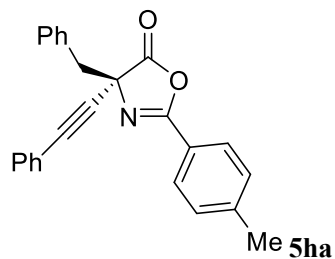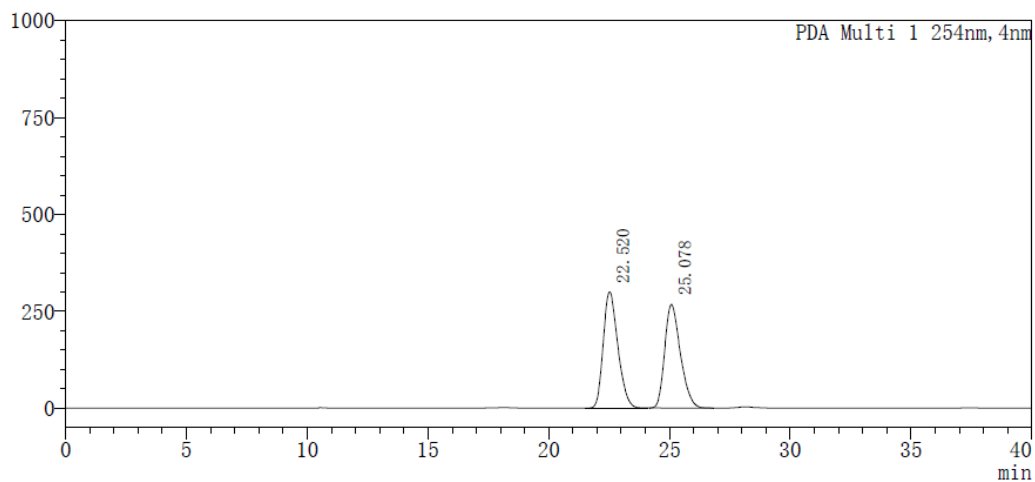

<Peak table>

PDA Ch1 254nm

| Peak# | Ret. Time | Height | Area     | Area%   |
|-------|-----------|--------|----------|---------|
| 1     | 22.520    | 299991 | 12671237 | 51.163  |
| 2     | 25.078    | 267687 | 12095348 | 48.837  |
| Total |           | 567678 | 24766585 | 100.000 |

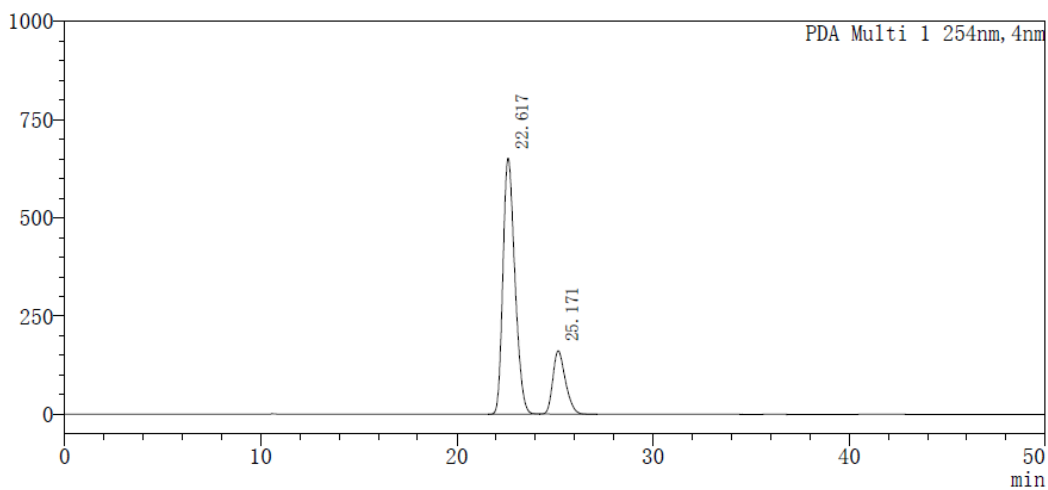

<Peak table>

PDA Ch1 254nm

| Peak# | Ret. Time | Height | Area     | Area%   |
|-------|-----------|--------|----------|---------|
| 1     | 22.617    | 651847 | 27642840 | 79.317  |
| 2     | 25.171    | 160983 | 7208187  | 20.683  |
| Total |           | 812830 | 34851027 | 100.000 |

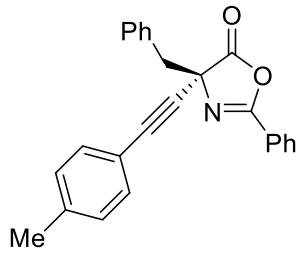

7.91  
7.89  
7.45  
7.43  
7.41  
7.36  
7.34  
7.27  
7.21  
7.19  
7.12  
7.10

3.59  
3.56  
3.49  
3.46

-2.34

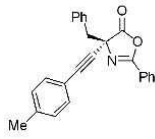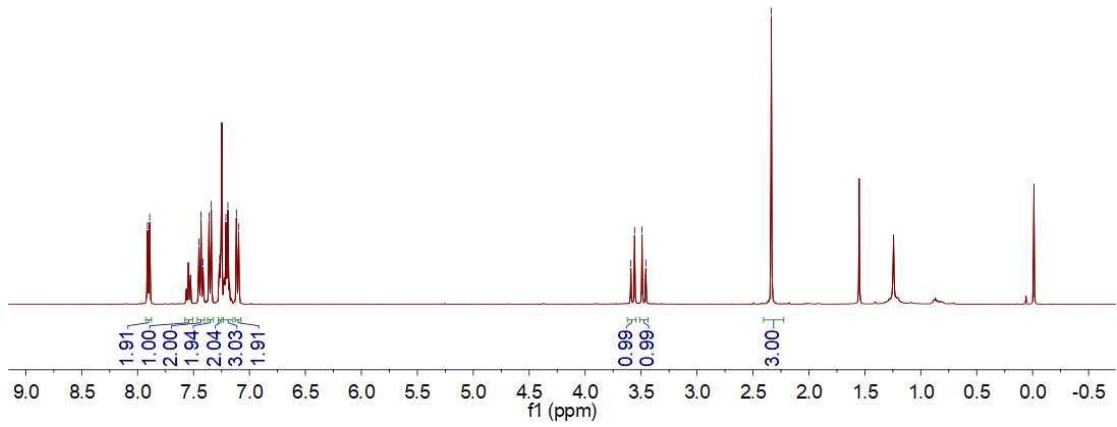

174.95  
161.61  
139.37  
133.17  
133.09  
132.02  
130.70  
129.14  
128.83  
128.30  
128.19  
127.81  
125.33  
118.53  
86.95  
82.10  
68.24  
45.22  
21.66

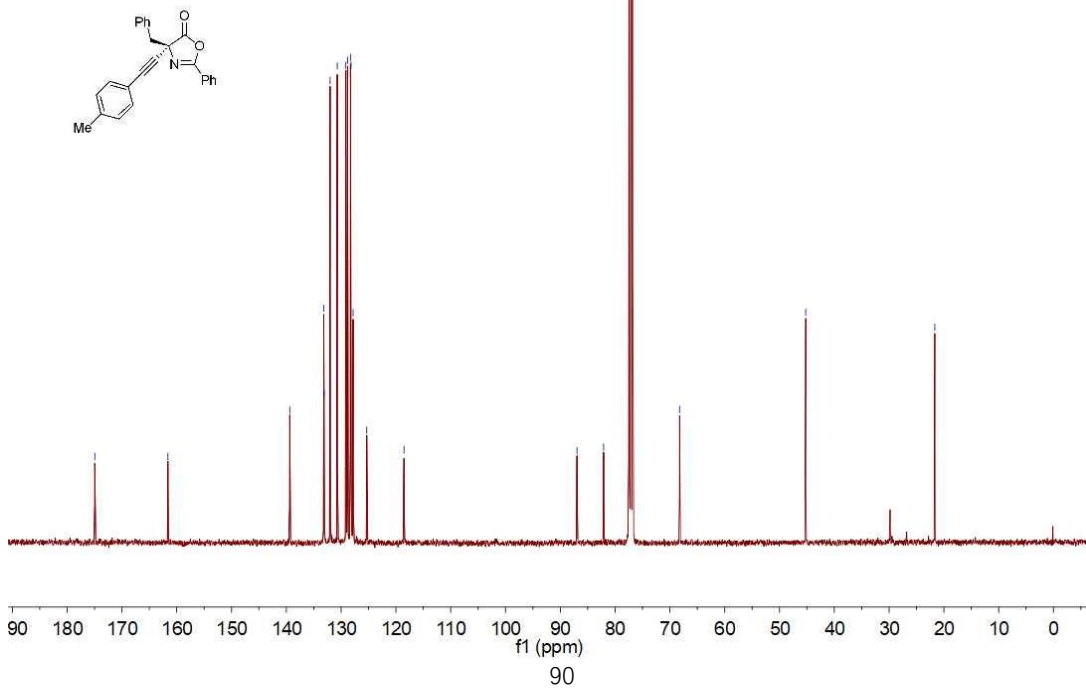

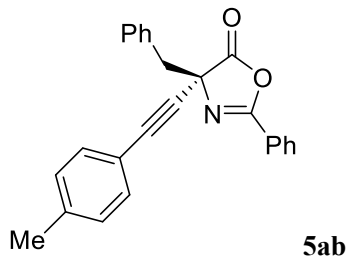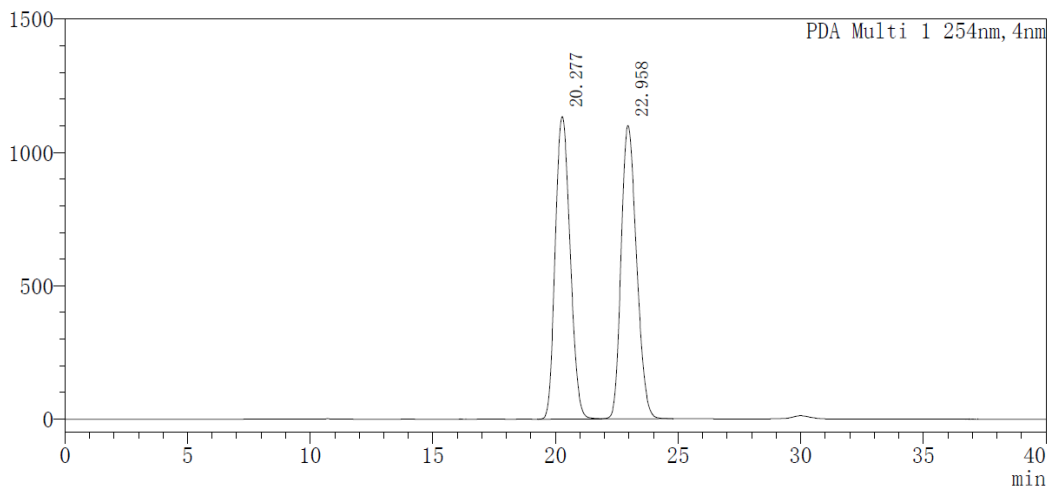

<Peak table>

PDA Ch1 254nm

| Peak# | Ret. Time | Height  | Area     | Area%   |
|-------|-----------|---------|----------|---------|
| 1     | 20.277    | 1133681 | 47852577 | 49.890  |
| 2     | 22.958    | 1099850 | 48062933 | 50.110  |
| Total |           | 2233531 | 95915510 | 100.000 |

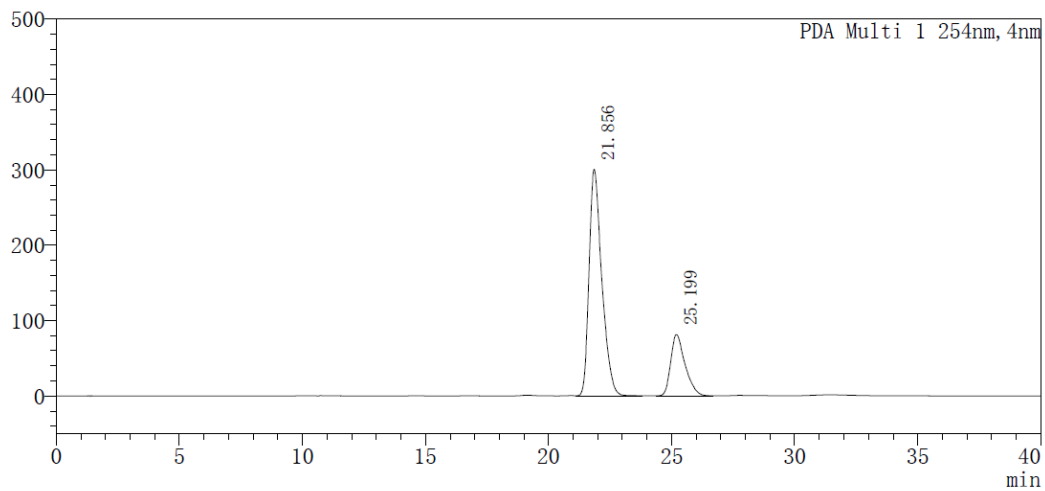

<Peak table>

PDA Ch1 254nm

| Peak# | Ret. Time | Height | Area     | Area%   |
|-------|-----------|--------|----------|---------|
| 1     | 21.856    | 300634 | 10835624 | 76.761  |
| 2     | 25.199    | 81198  | 3280455  | 23.239  |
| Total |           | 381832 | 14116079 | 100.000 |

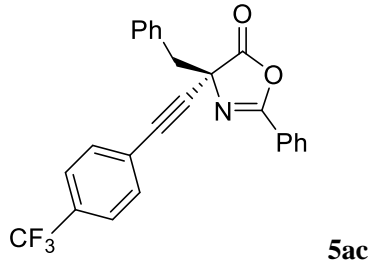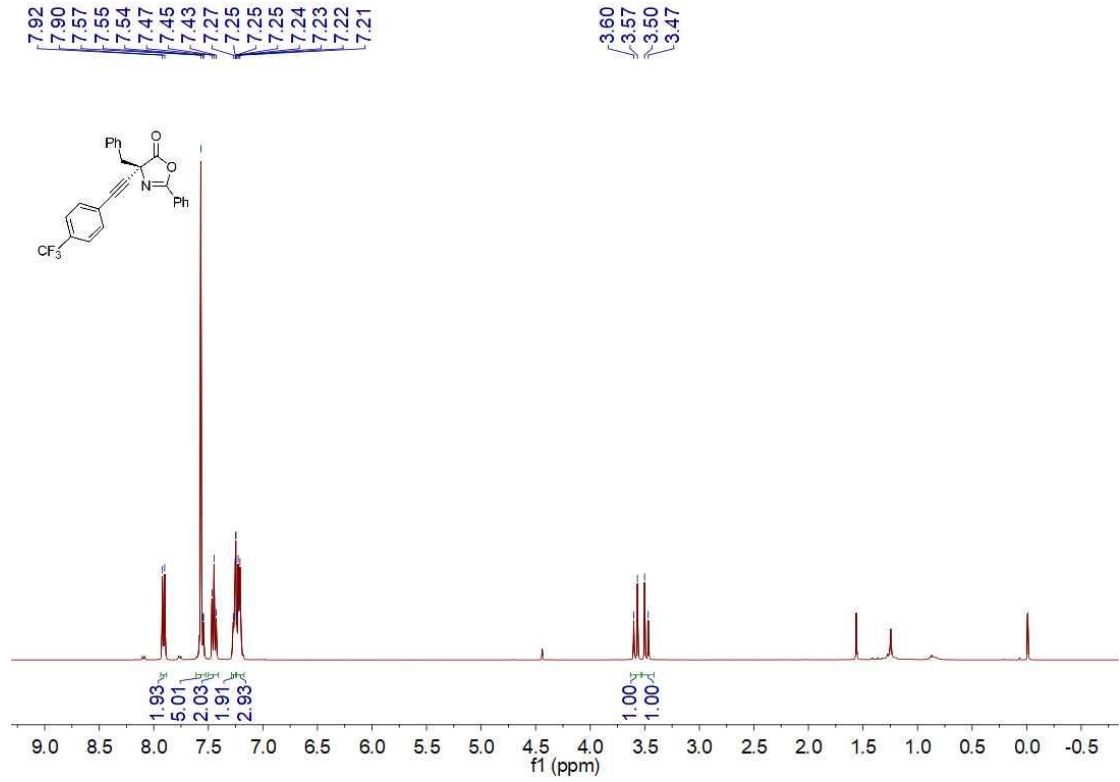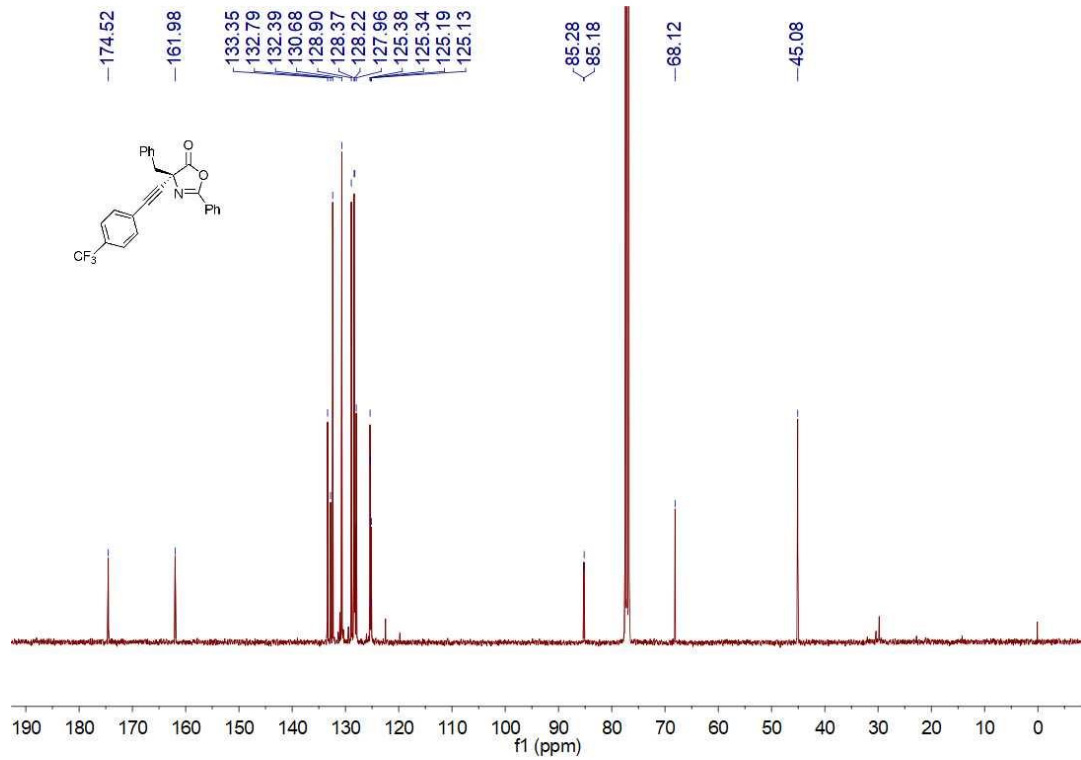

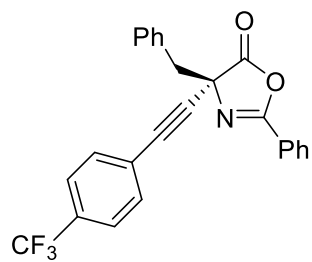

**5ac**

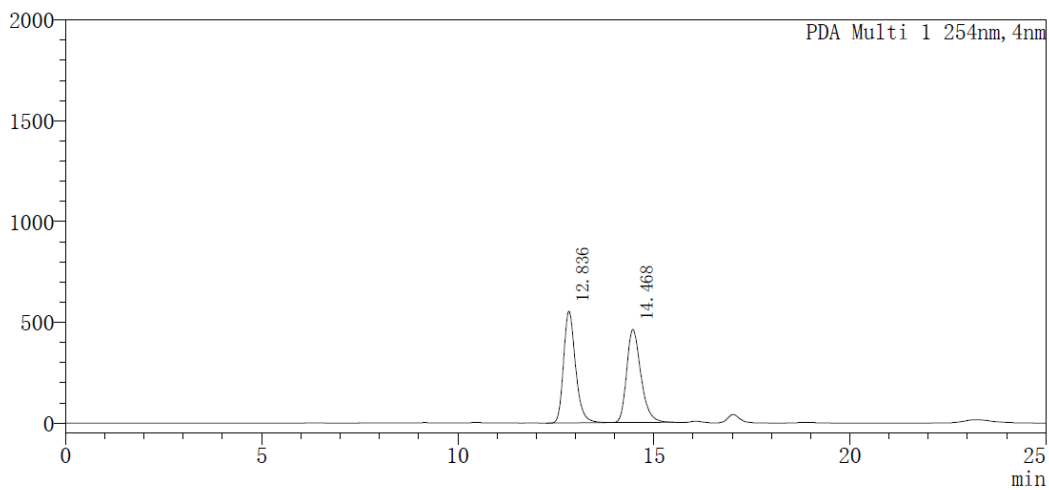

<Peak table>

PDA Ch1 254nm

| Peak# | Ret. Time | Height  | Area     | Area%   |
|-------|-----------|---------|----------|---------|
| 1     | 12.836    | 554411  | 11772947 | 50.206  |
| 2     | 14.468    | 462647  | 11676176 | 49.794  |
| Total |           | 1017058 | 23449123 | 100.000 |

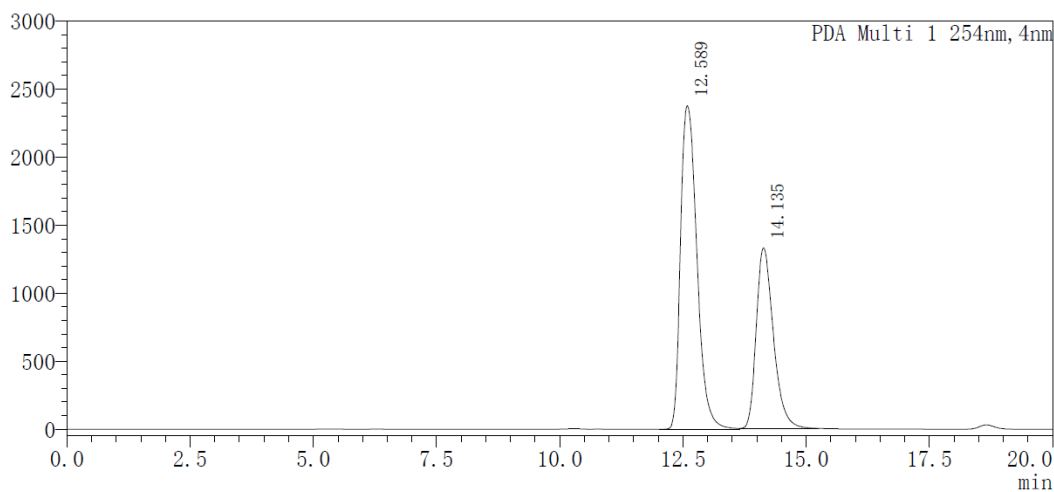

<Peak table>

PDA Ch1 254nm

| Peak# | Ret. Time | Height  | Area     | Area%   |
|-------|-----------|---------|----------|---------|
| 1     | 12.589    | 2379241 | 54994714 | 63.134  |
| 2     | 14.135    | 1327265 | 32112891 | 36.866  |
| Total |           | 3706506 | 87107605 | 100.000 |

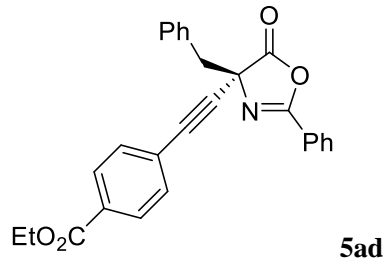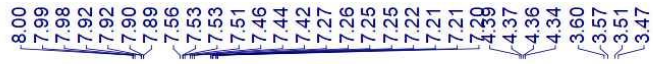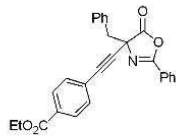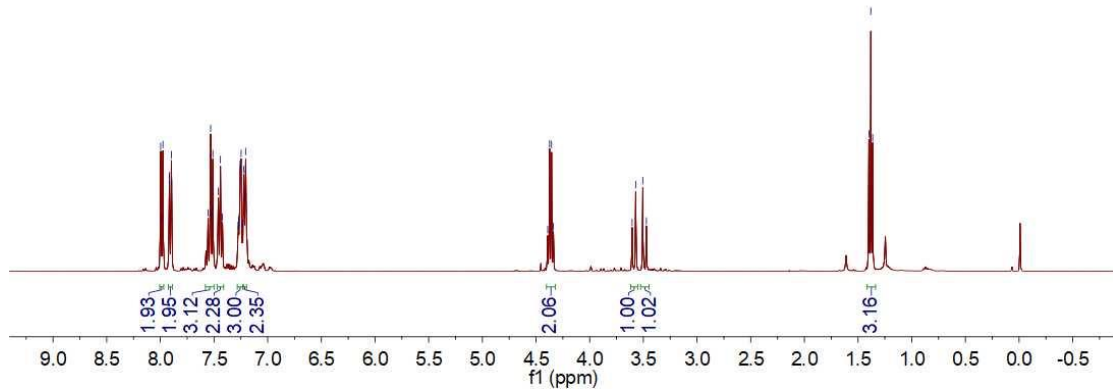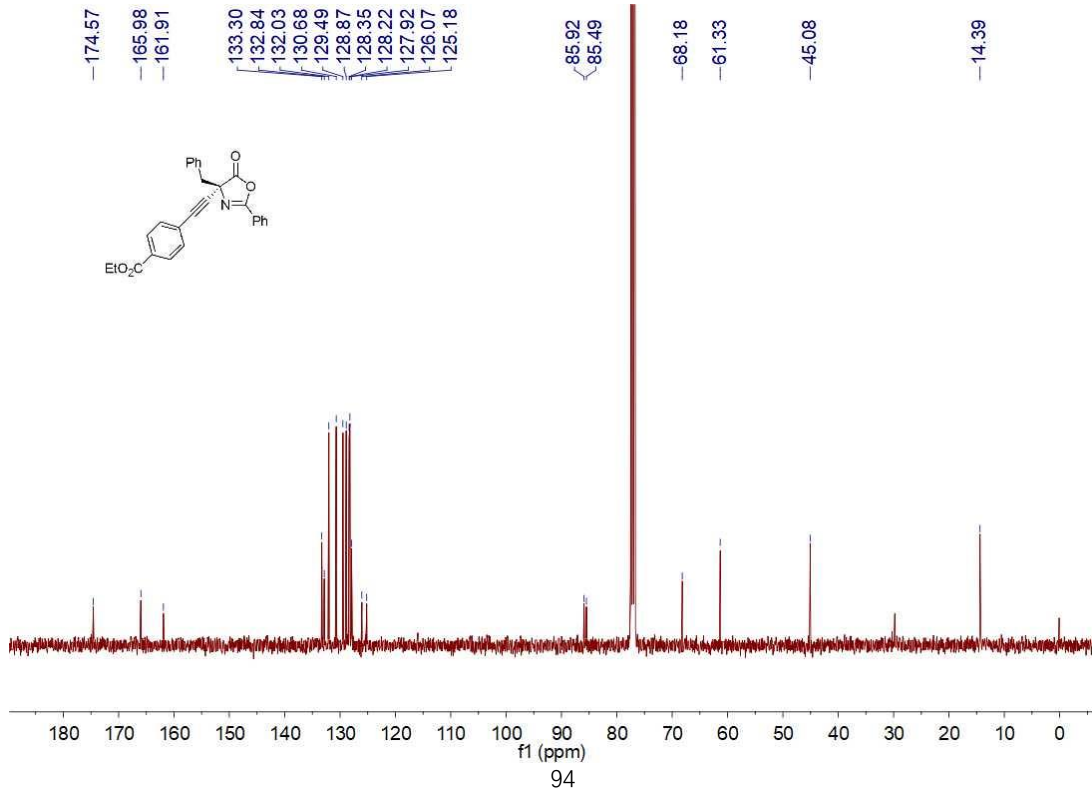

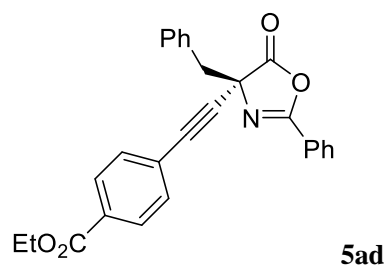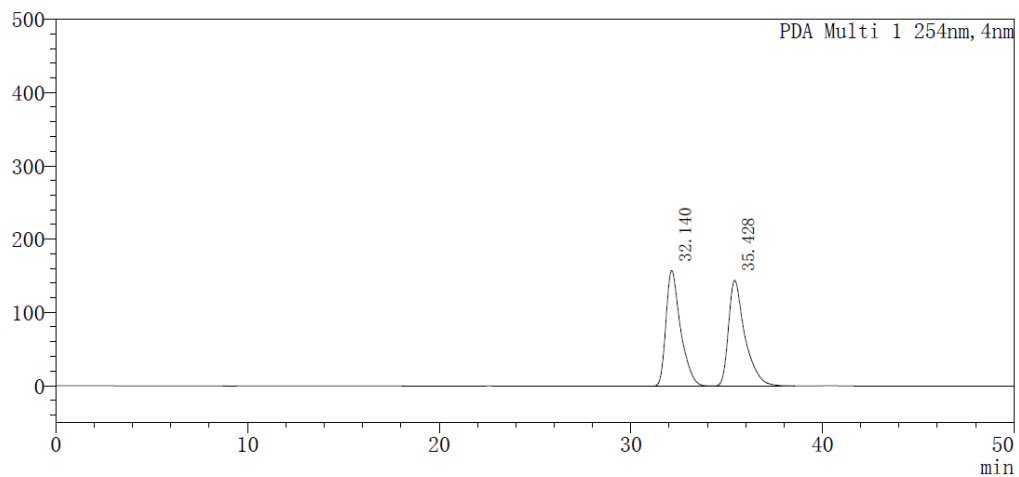

<Peak table>

PDA Ch1 254nm

| Peak# | Ret. Time | Height | Area     | Area%   |
|-------|-----------|--------|----------|---------|
| 1     | 32.140    | 157930 | 8371501  | 49.220  |
| 2     | 35.428    | 144445 | 8636968  | 50.780  |
| Total |           | 302375 | 17008469 | 100.000 |

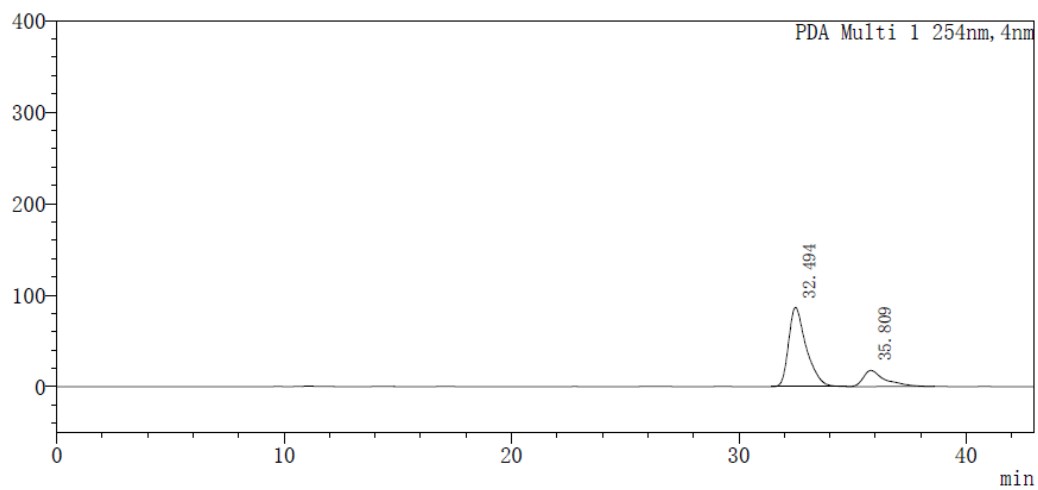

<Peak table>

PDA Ch1 254nm

| Peak# | Ret. Time | Height | Area    | Area%   |
|-------|-----------|--------|---------|---------|
| 1     | 32.494    | 86613  | 4665730 | 79.845  |
| 2     | 35.809    | 17645  | 1177760 | 20.155  |
| Total |           | 104258 | 5843490 | 100.000 |

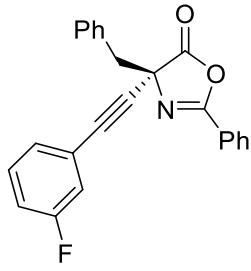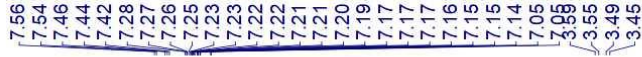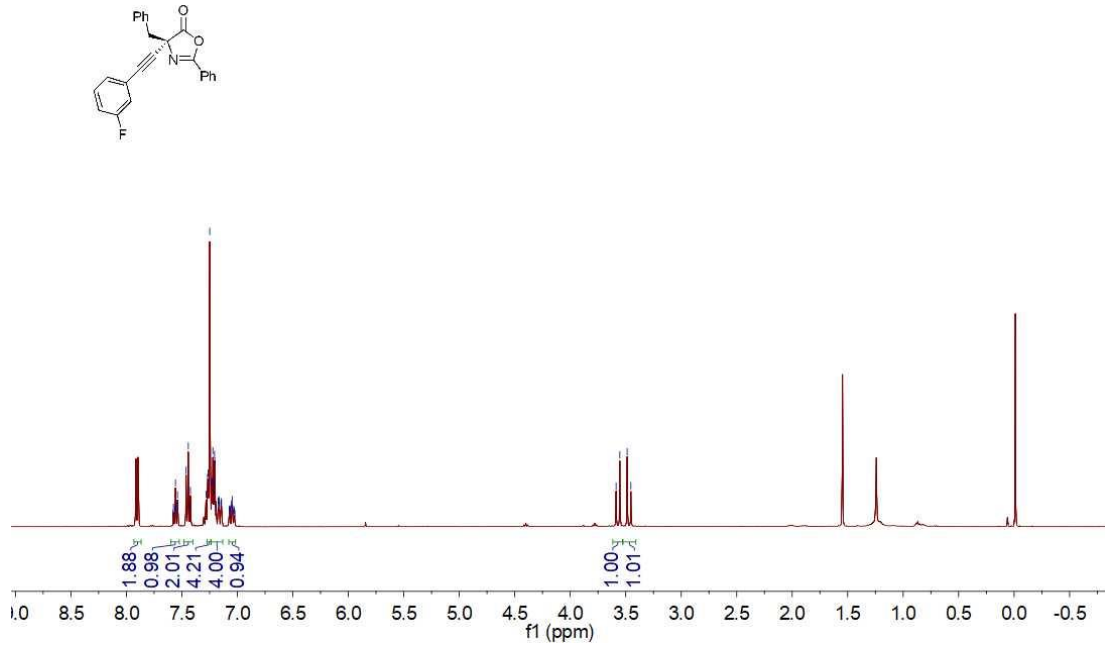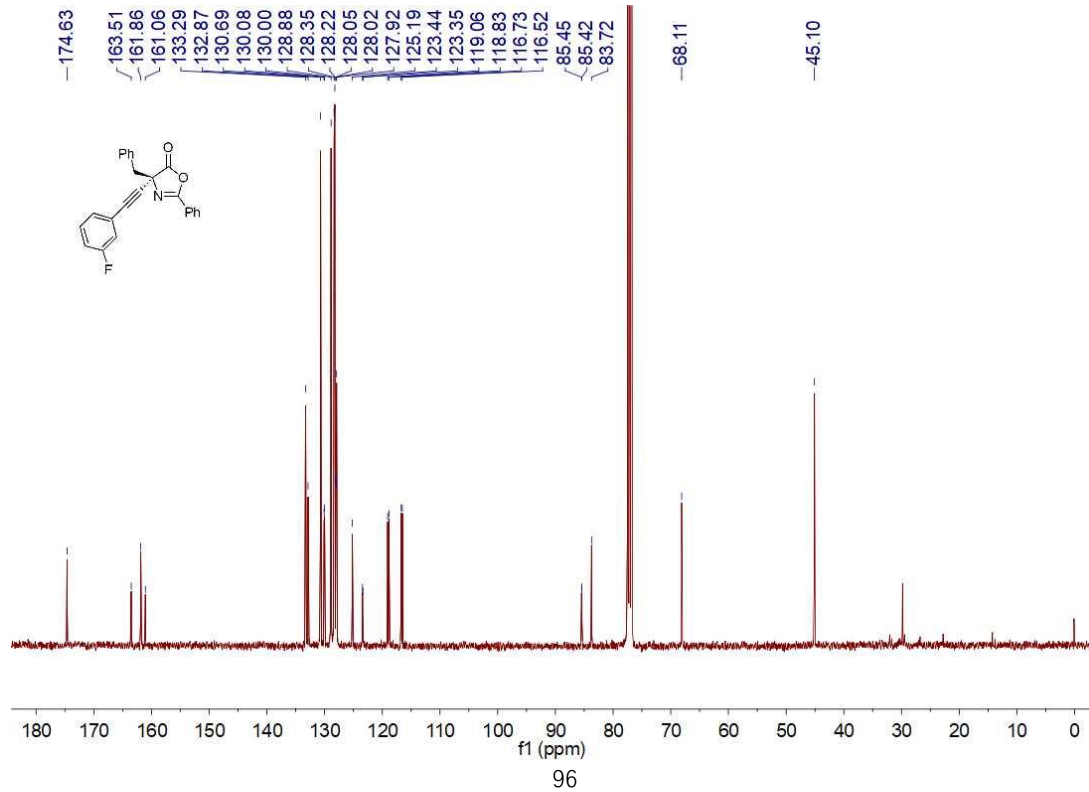



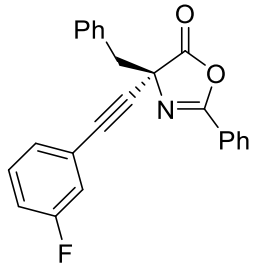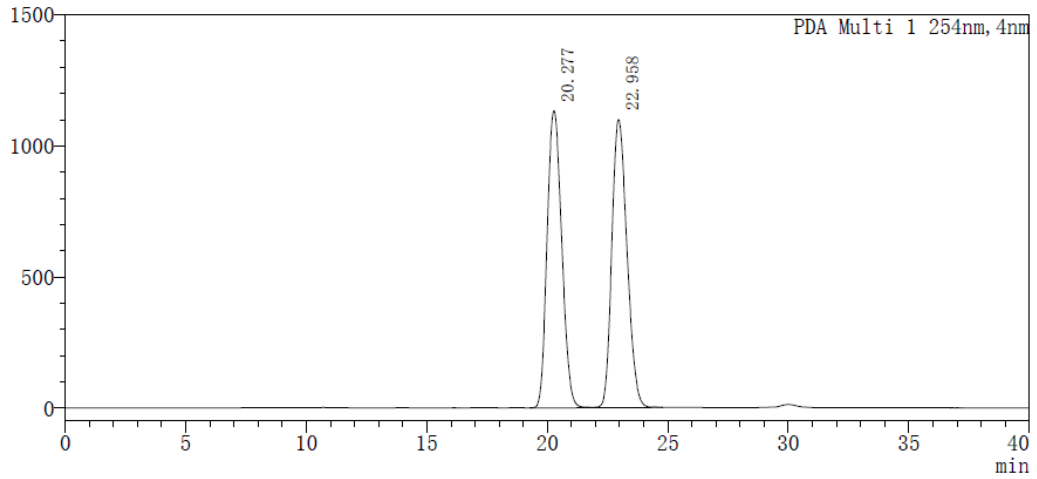

<Peak table>

PDA Ch1 254nm

| Peak# | Ret. Time | Height  | Area     | Area%   |
|-------|-----------|---------|----------|---------|
| 1     | 20.277    | 1133681 | 47852577 | 49.890  |
| 2     | 22.958    | 1099850 | 48062933 | 50.110  |
| Total |           | 2233531 | 95915510 | 100.000 |

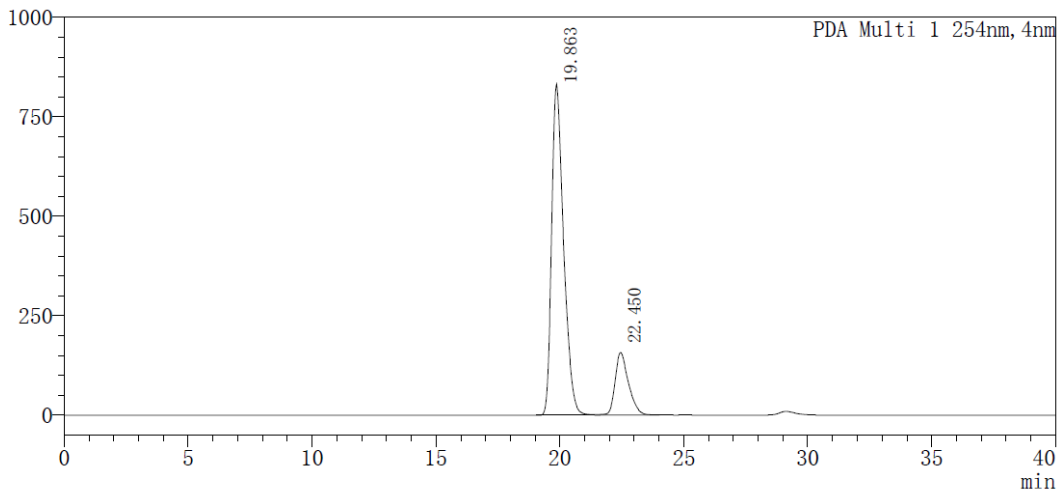

<Peak table>

PDA Ch1 254nm

| Peak# | Ret. Time | Height | Area     | Area%   |
|-------|-----------|--------|----------|---------|
| 1     | 19.863    | 830996 | 27894061 | 82.524  |
| 2     | 22.450    | 157190 | 5907002  | 17.476  |
| Total |           | 988185 | 33801063 | 100.000 |

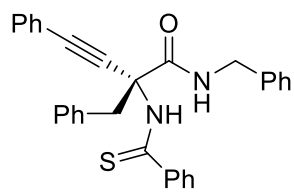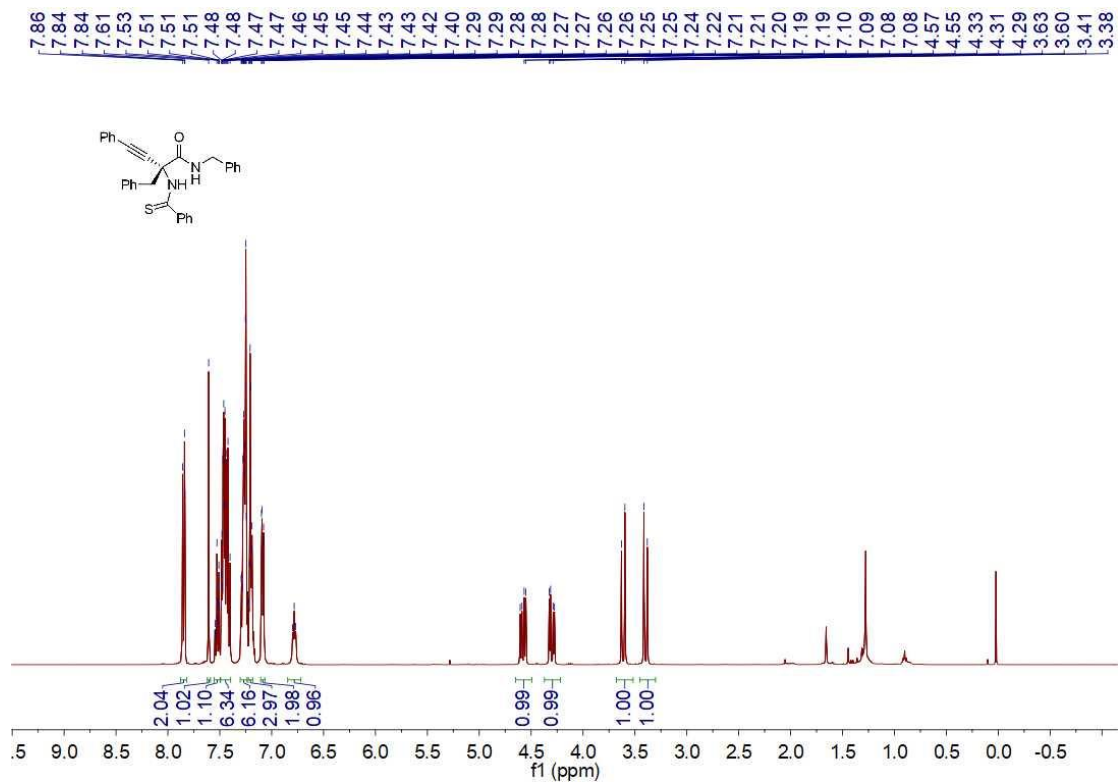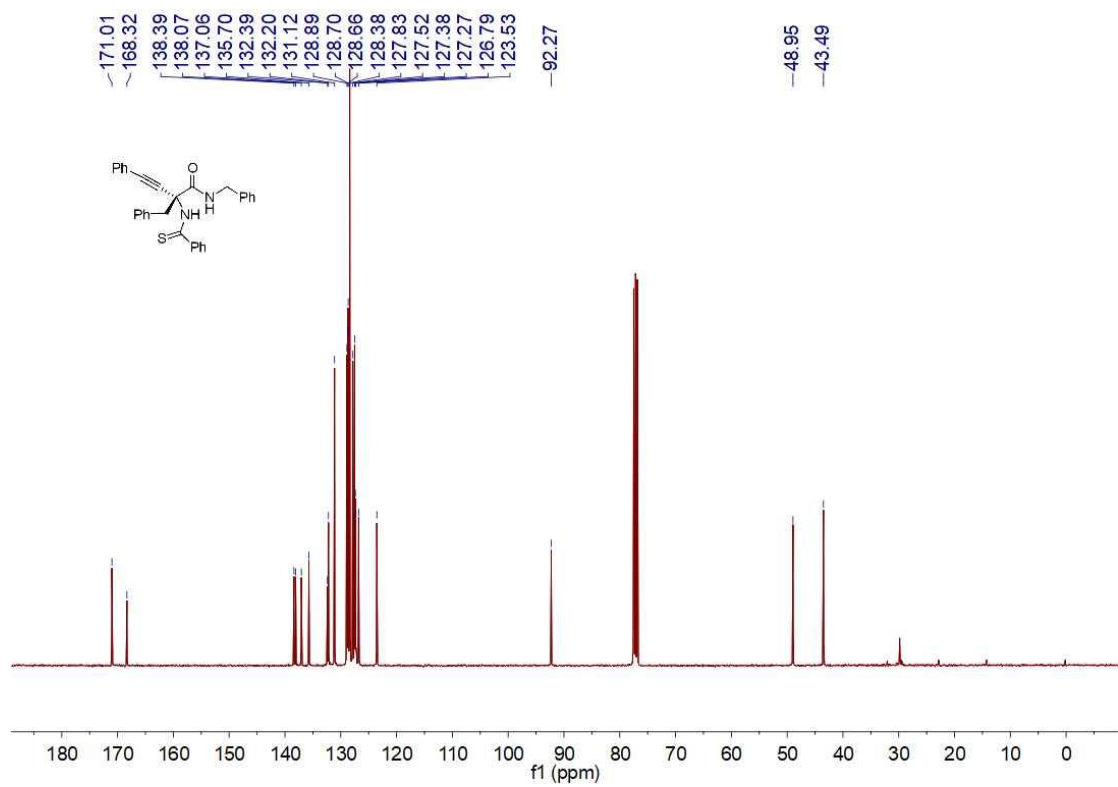

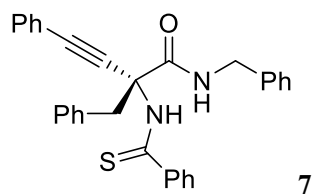

7

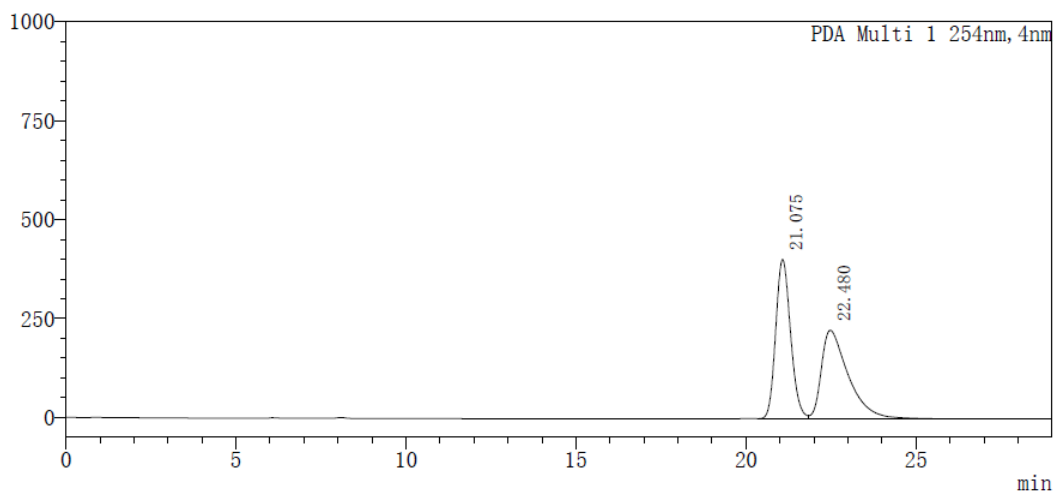

<Peak table>

PDA Ch1 254nm

| Peak# | Ret. Time | Height | Area     | Area%   |
|-------|-----------|--------|----------|---------|
| 1     | 21.075    | 402630 | 12267256 | 49.893  |
| 2     | 22.480    | 223605 | 12319857 | 50.107  |
| Total |           | 626235 | 24587113 | 100.000 |

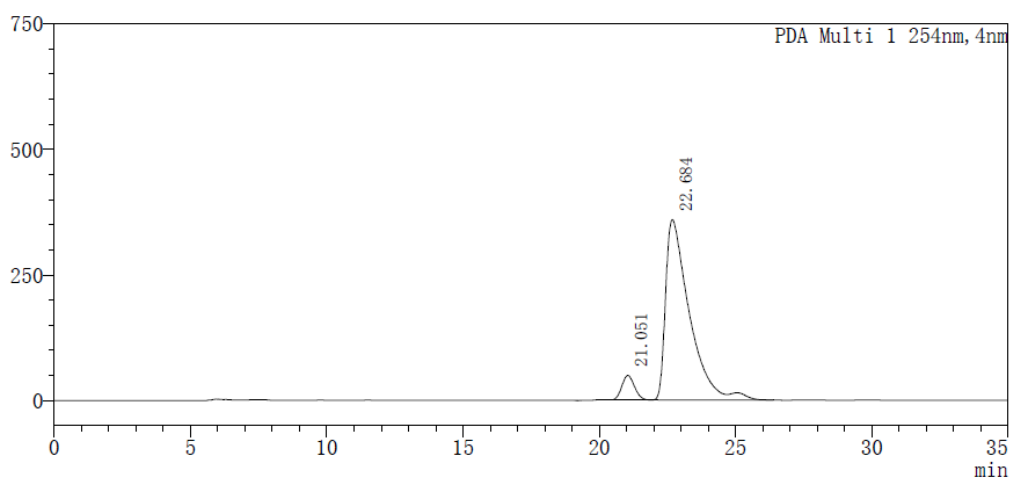

<Peak table>

PDA Ch1 254nm

| Peak# | Ret. Time | Height | Area     | Area%   |
|-------|-----------|--------|----------|---------|
| 1     | 21.051    | 48607  | 1560838  | 6.661   |
| 2     | 22.684    | 358808 | 21872027 | 93.339  |
| Total |           | 407415 | 23432864 | 100.000 |

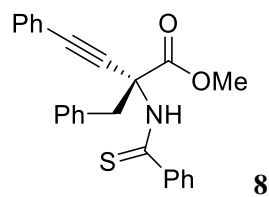

7.81  
7.80  
7.79  
7.50  
7.49  
7.48  
7.47  
7.45  
7.43  
7.42  
7.39  
7.38  
7.27  
7.25  
7.24  
7.18  
7.12  
6.95  
6.94

3.77  
3.76  
3.74  
3.73  
3.71  
3.70  
3.49  
3.48  
3.46  
3.45

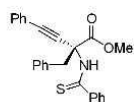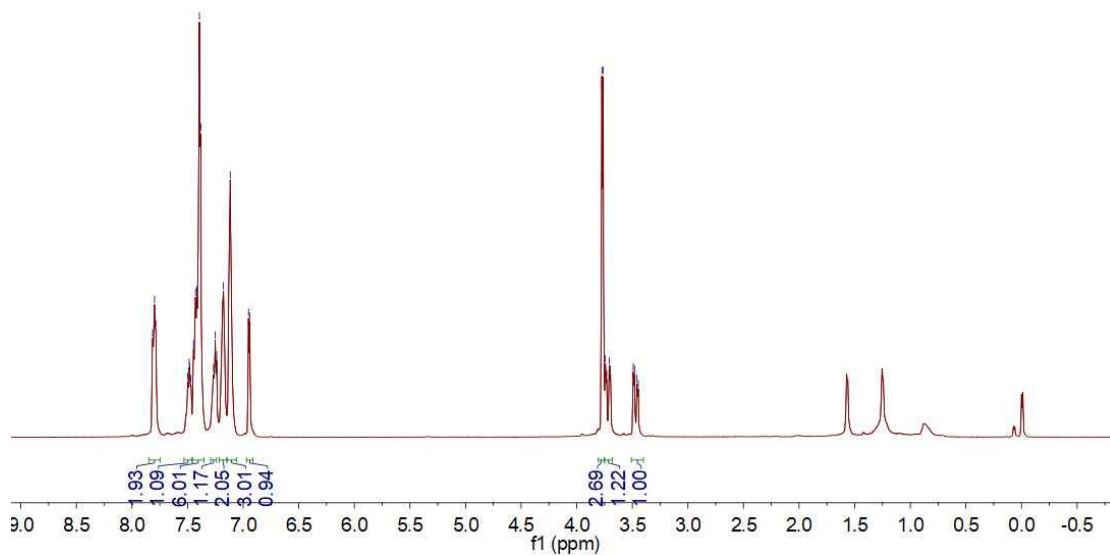

171.22  
167.66  
139.78  
136.36  
135.04  
132.46  
131.89  
131.11  
128.76  
128.74  
128.37  
128.15  
127.74  
127.40  
126.75  
121.41

93.16  
53.38  
46.33

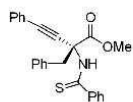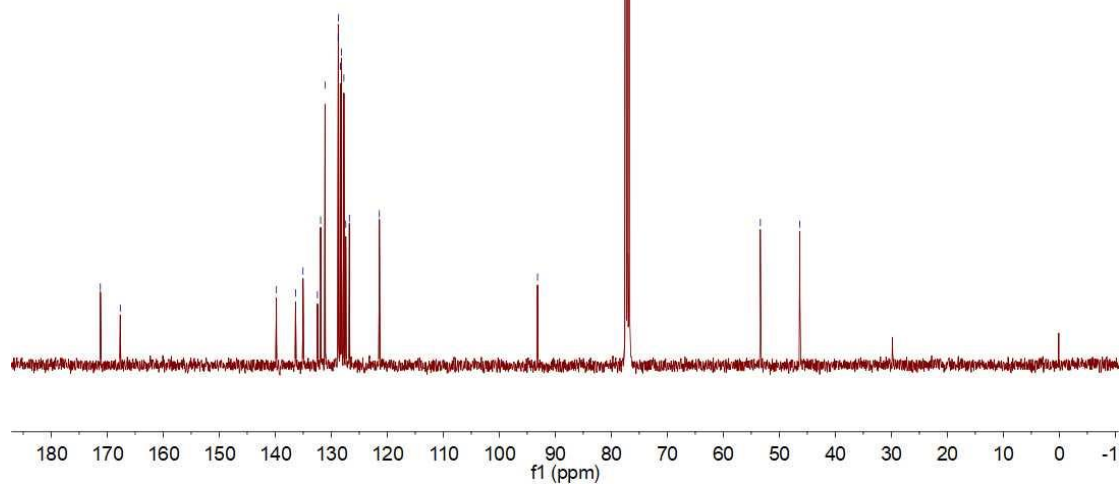

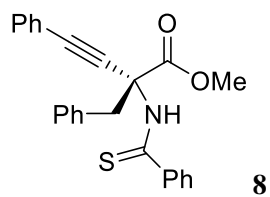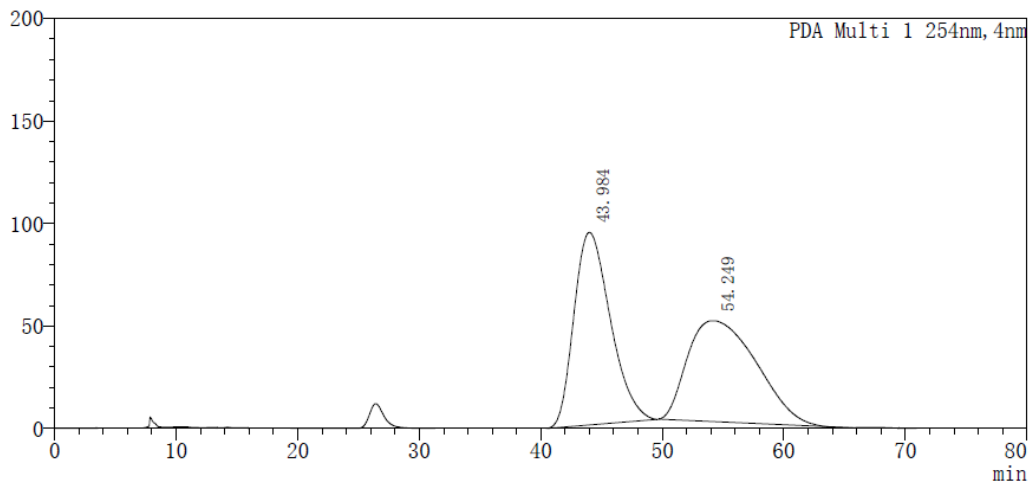

<Peak table>

PDA Ch1 254nm

| Peak# | Ret. Time | Height | Area     | Area%   |
|-------|-----------|--------|----------|---------|
| 1     | 43.984    | 94053  | 19608822 | 50.249  |
| 2     | 54.249    | 49254  | 19414188 | 49.751  |
| Total |           | 143306 | 39023010 | 100.000 |

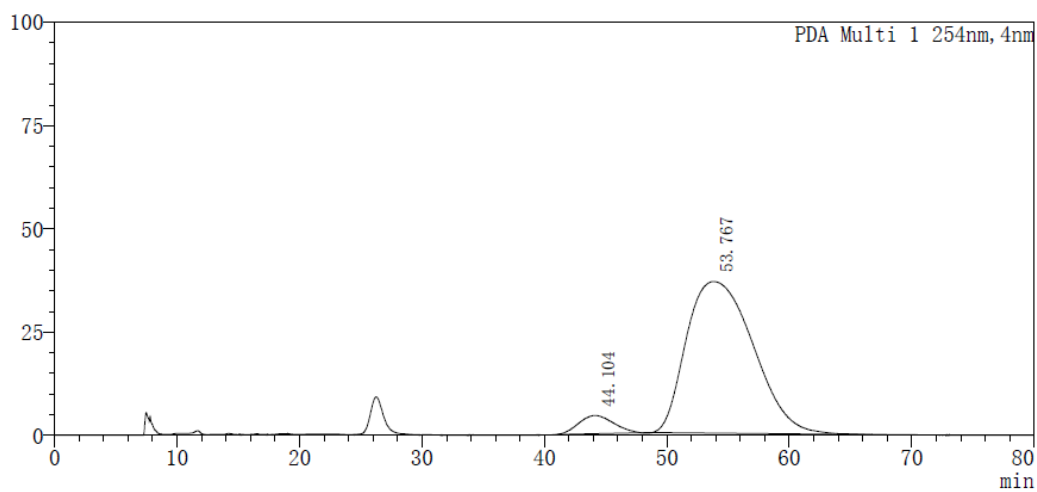

<Peak table>

PDA Ch1 254nm

| Peak# | Ret. Time | Height | Area     | Area%   |
|-------|-----------|--------|----------|---------|
| 1     | 44.104    | 4372   | 856072   | 5.783   |
| 2     | 53.767    | 36691  | 13947603 | 94.217  |
| Total |           | 41063  | 14803675 | 100.000 |

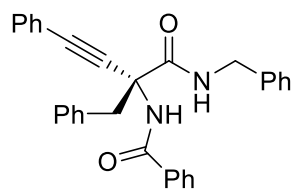

9

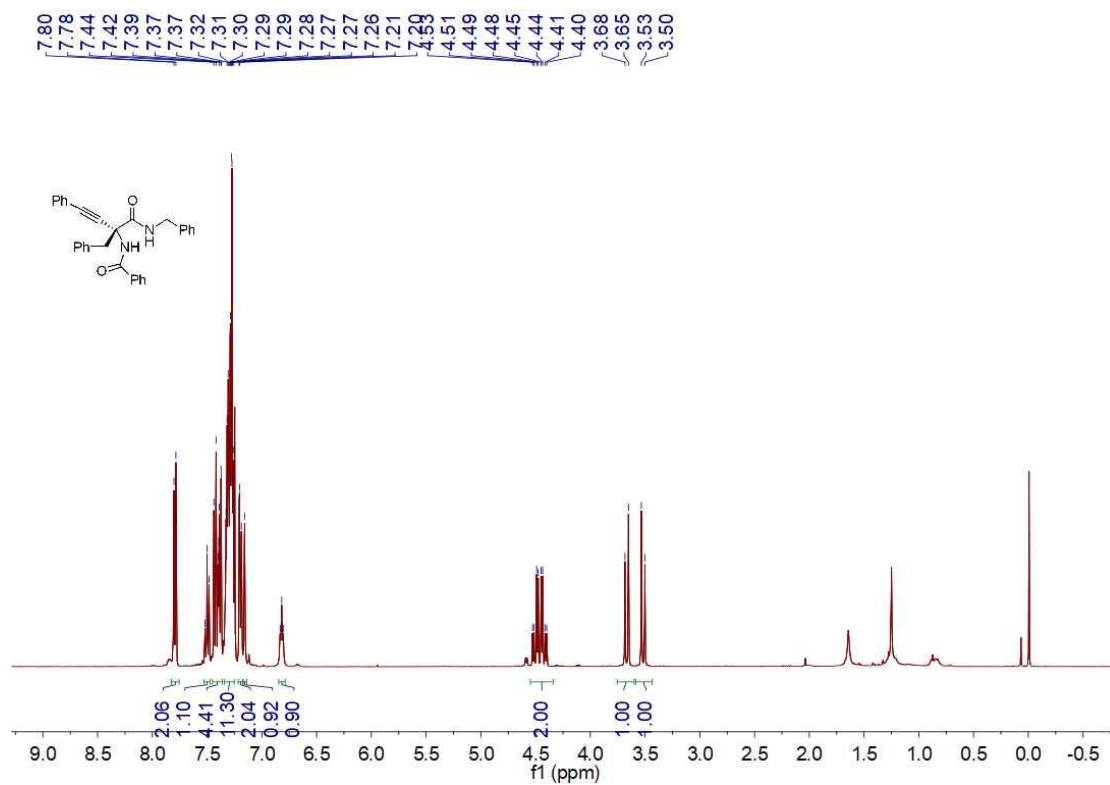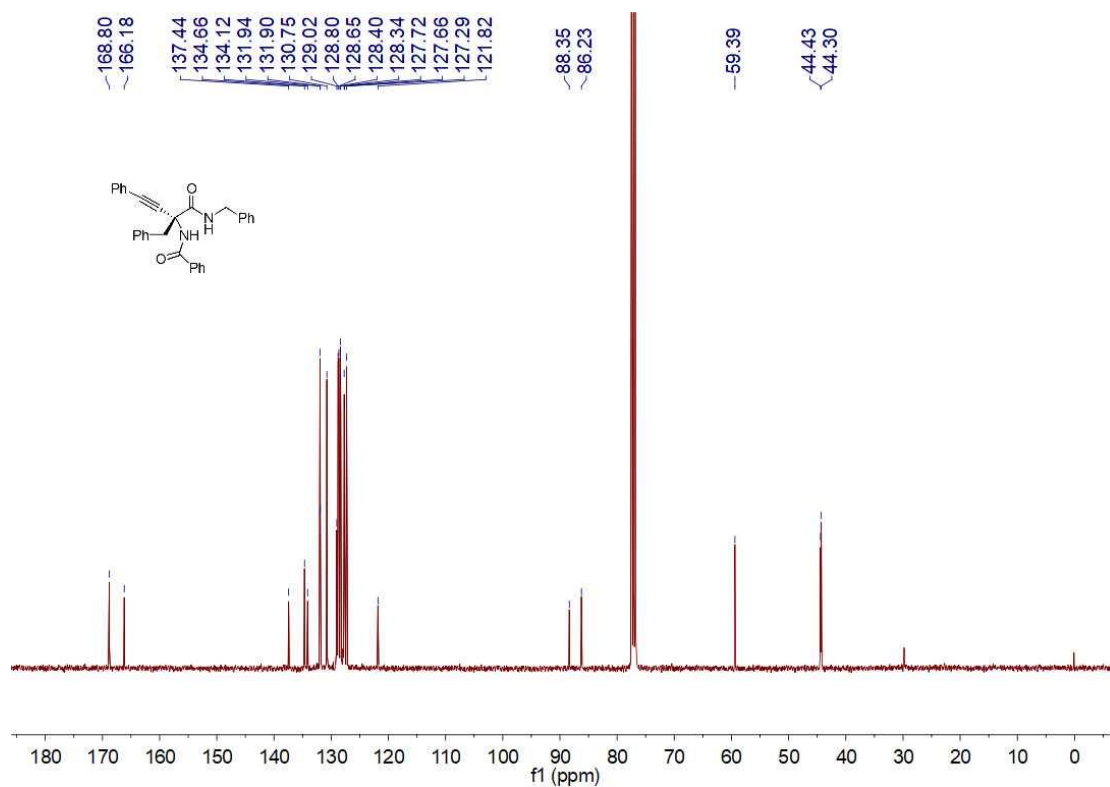

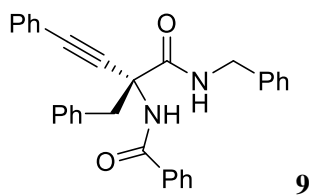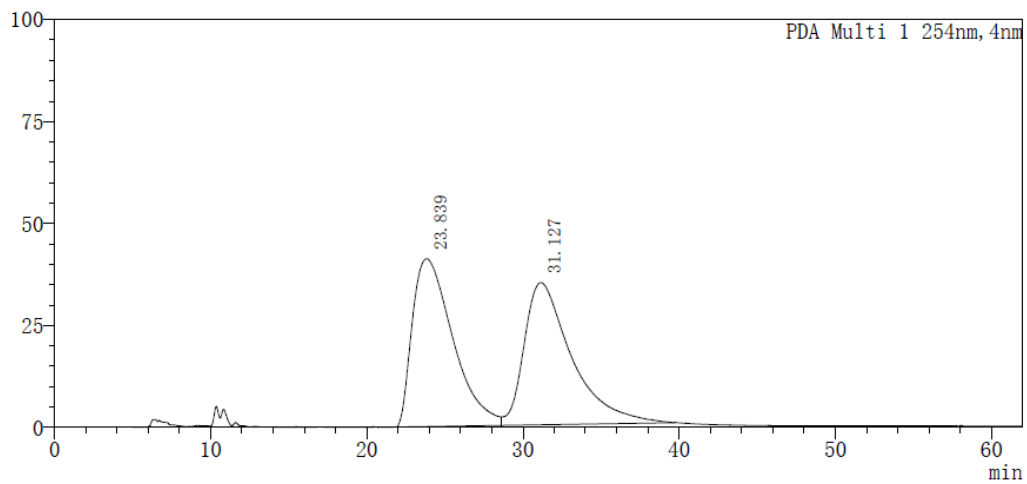

<Peak table>

PDA Ch1 254nm

| Peak# | Ret. Time | Height | Area     | Area%   |
|-------|-----------|--------|----------|---------|
| 1     | 23.839    | 41133  | 7425499  | 50.174  |
| 2     | 31.127    | 34872  | 7374009  | 49.826  |
| Total |           | 76005  | 14799509 | 100.000 |

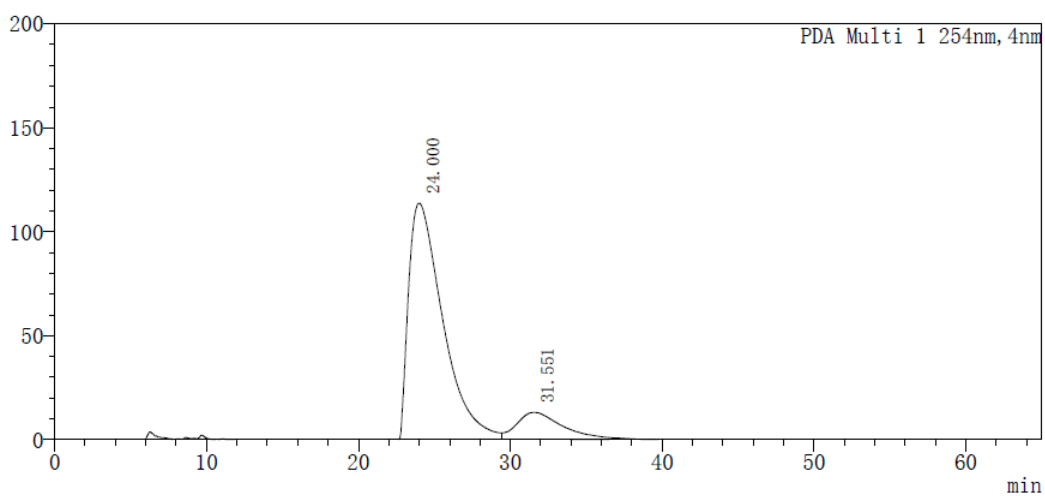

<Peak table>

PDA Ch1 254nm

| Peak# | Ret. Time | Height | Area     | Area%   |
|-------|-----------|--------|----------|---------|
| 1     | 24.000    | 114180 | 17938560 | 86.381  |
| 2     | 31.551    | 13259  | 2828168  | 13.619  |
| Total |           | 127439 | 20766728 | 100.000 |

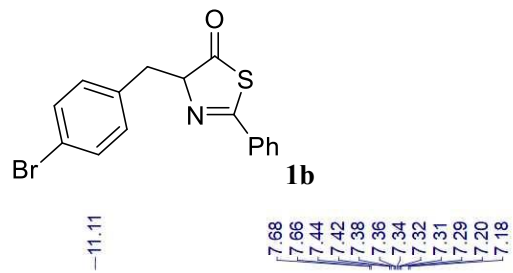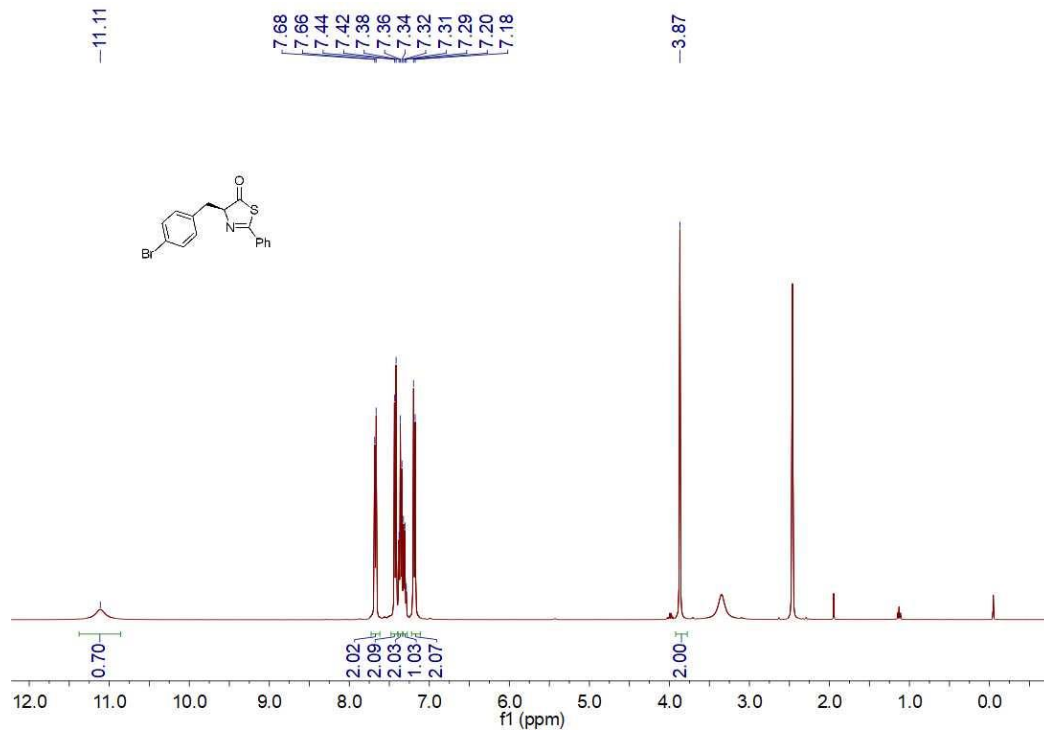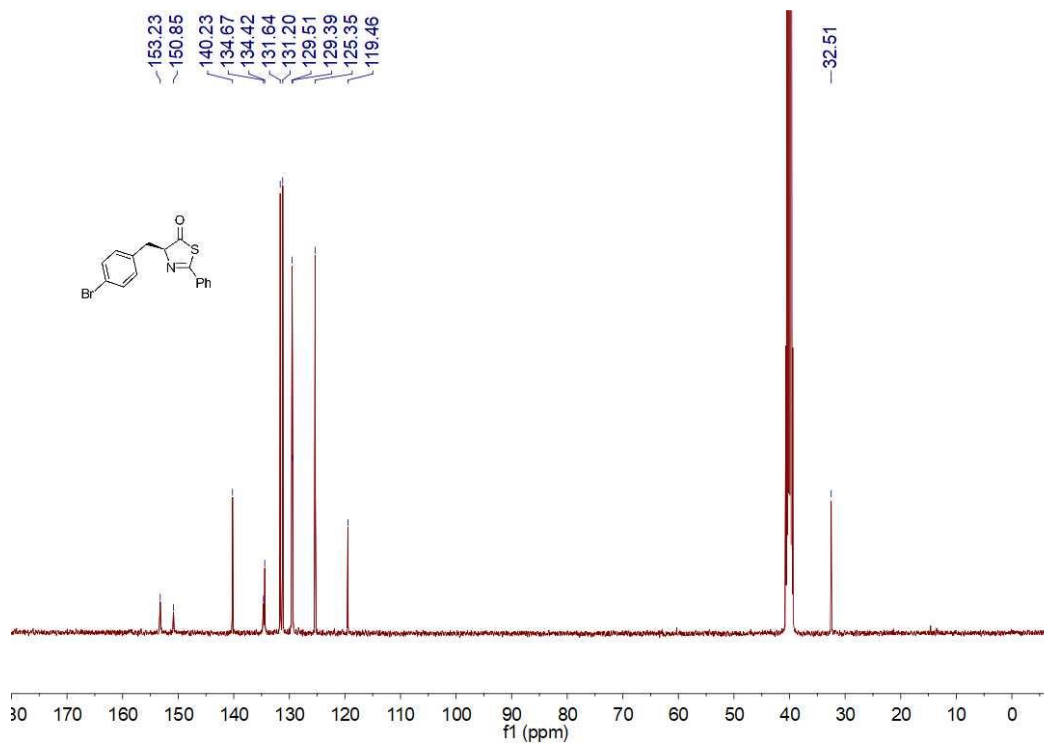



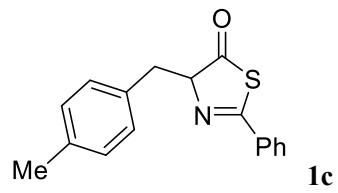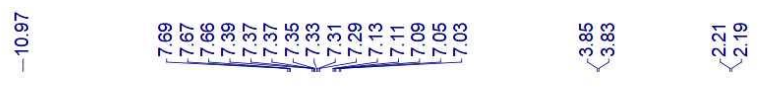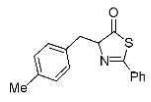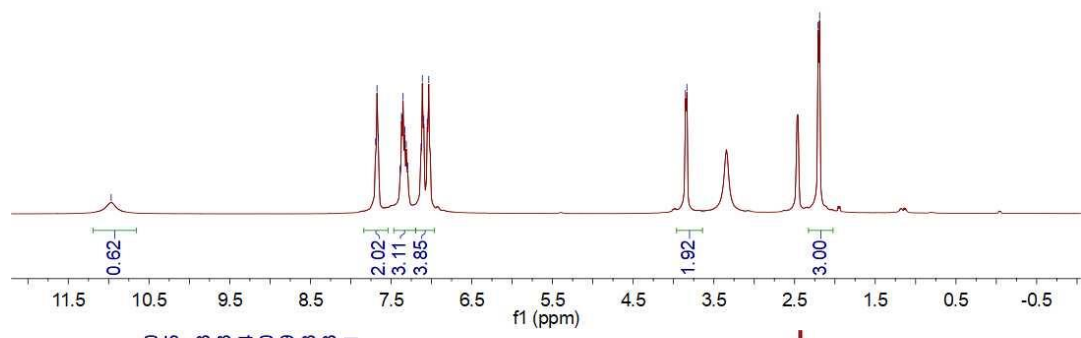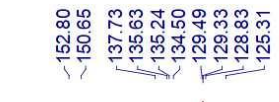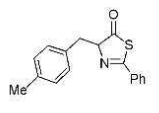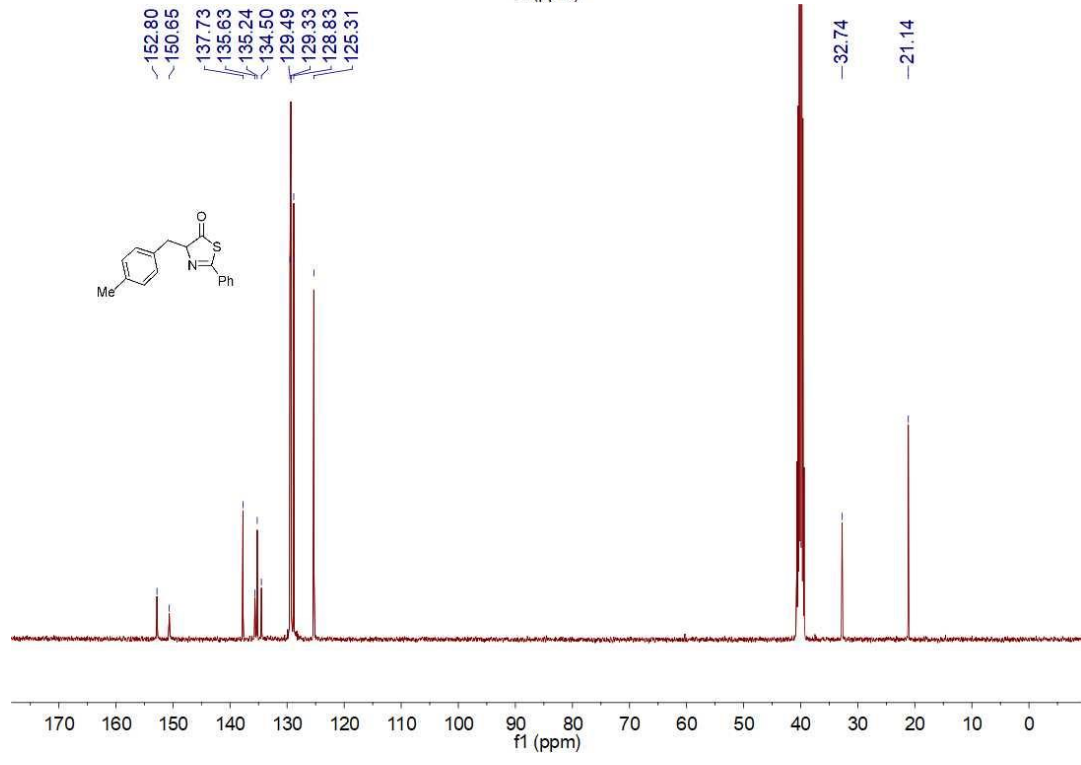

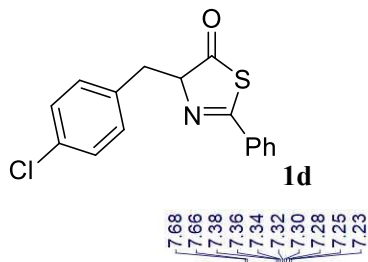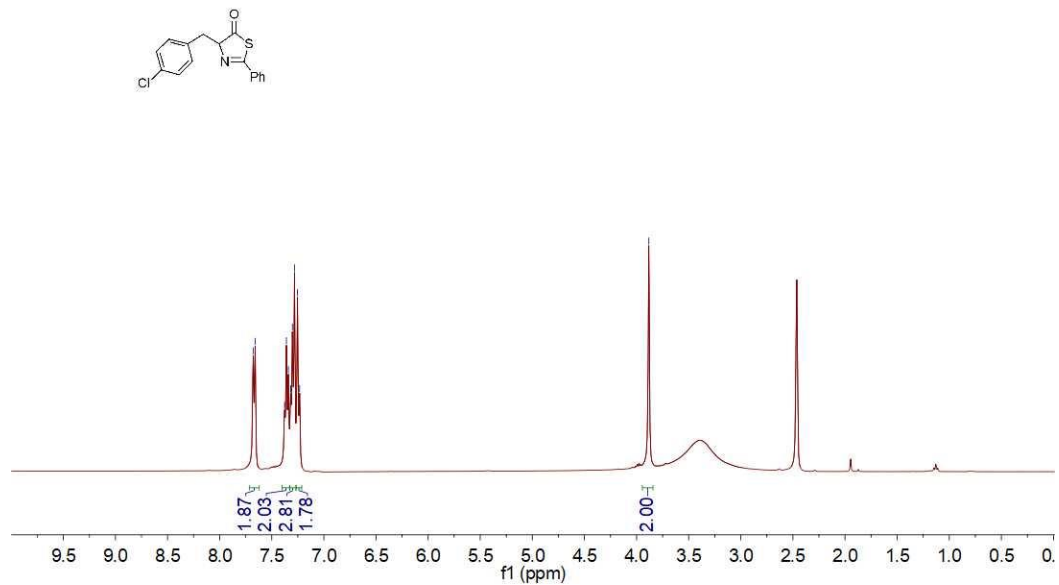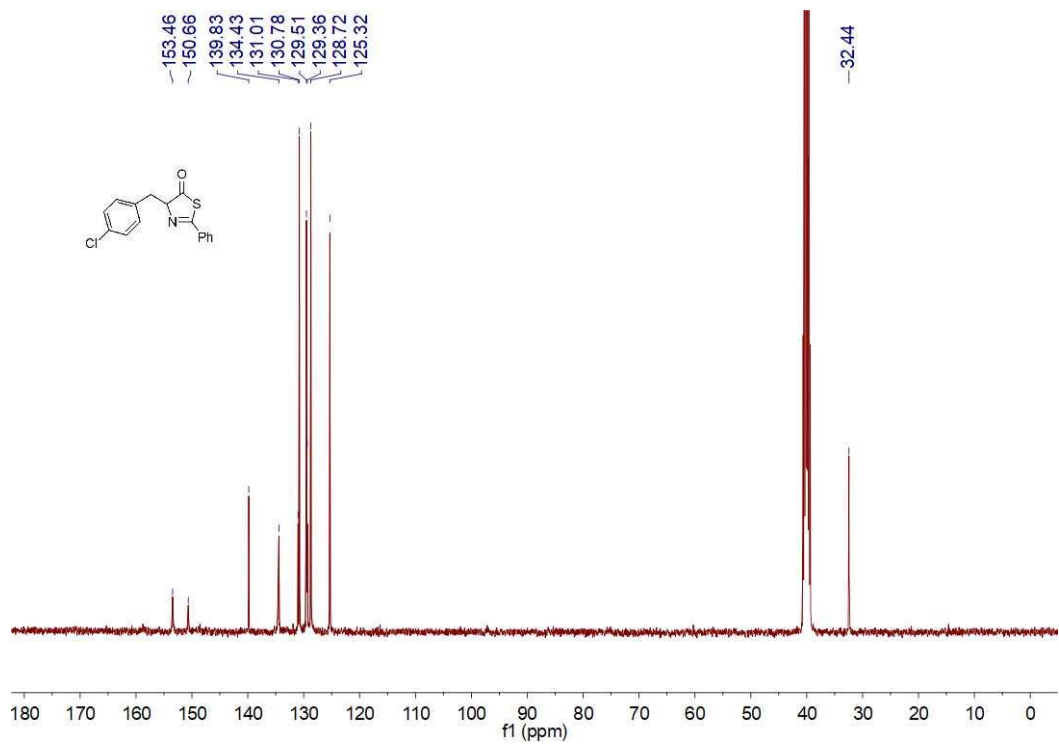

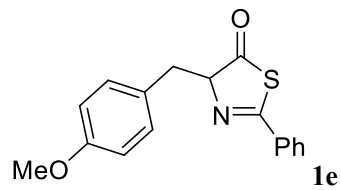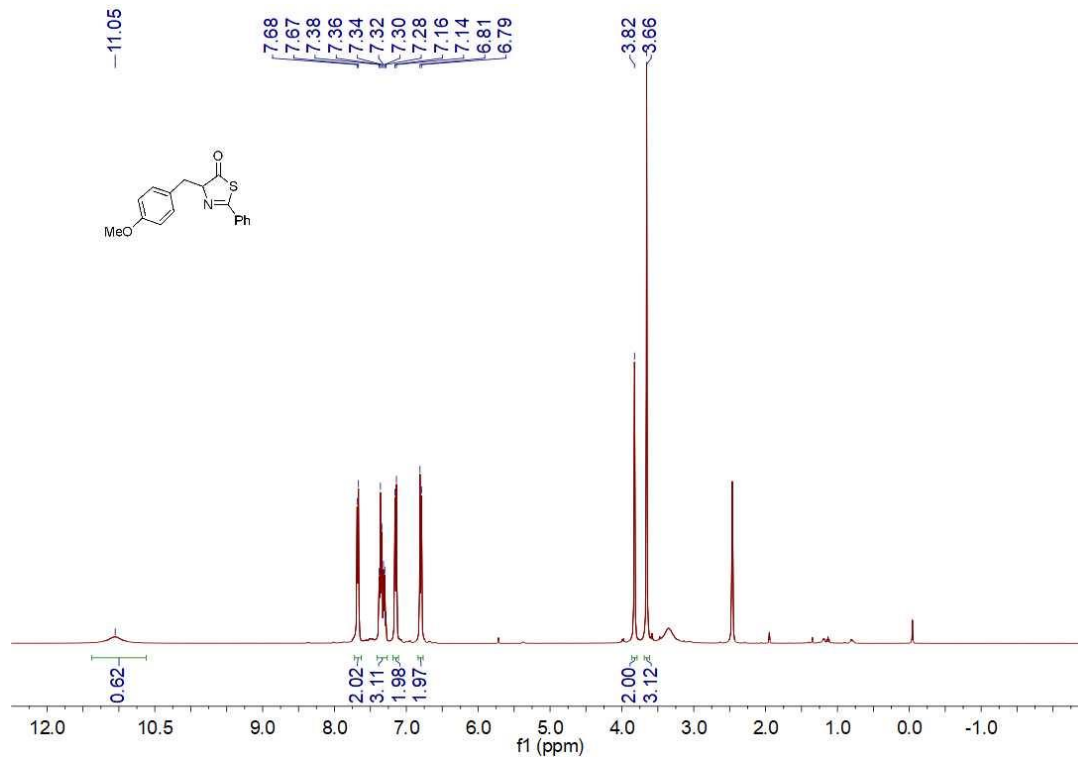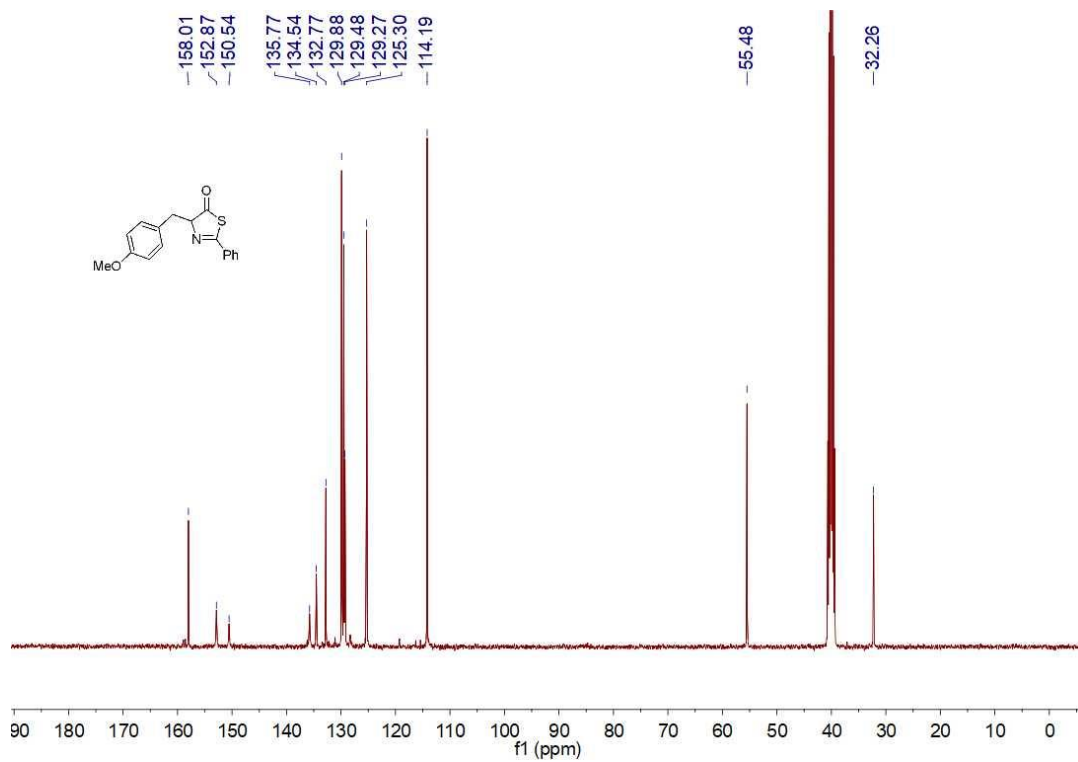

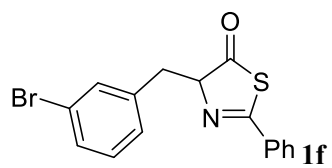

7.68  
7.67  
7.41  
7.39  
7.37  
7.35  
7.33  
7.31  
7.23  
7.21

3.90

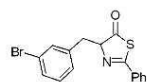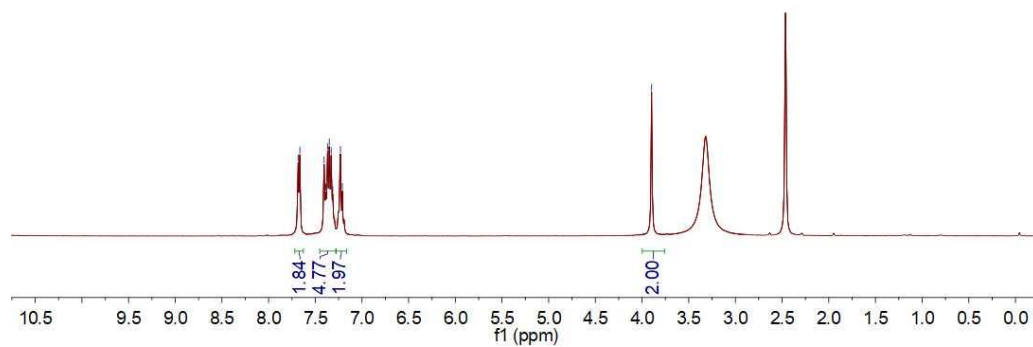

153.33  
150.91  
150.67  
138.51  
137.89  
135.14  
134.49  
133.62  
132.12  
129.50  
129.32  
128.27  
127.97  
127.89  
126.77  
126.54  
125.82  
125.32

33.41

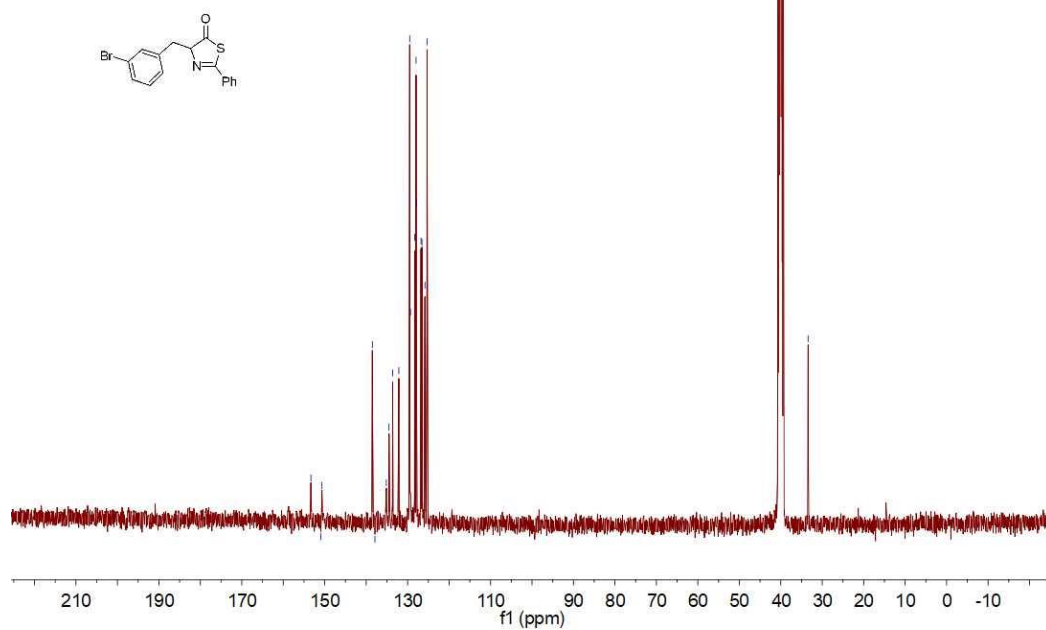

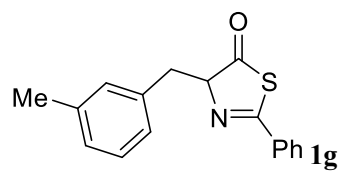

7.69  
7.67  
7.37  
7.36  
7.34  
7.31  
7.29  
7.27  
7.13  
7.11  
7.10  
7.05  
7.03  
6.94  
6.92

-3.87

-2.21

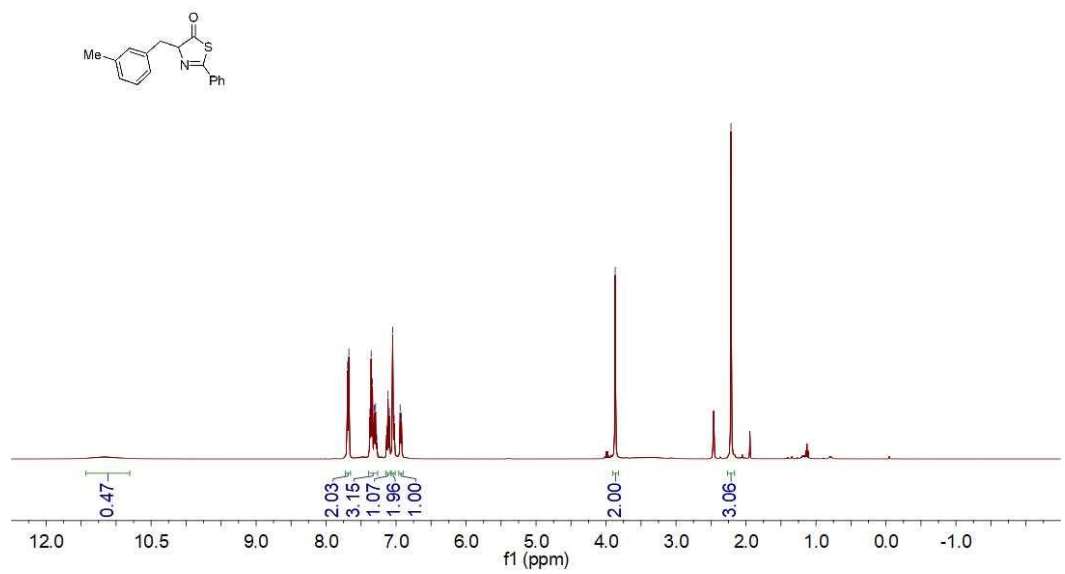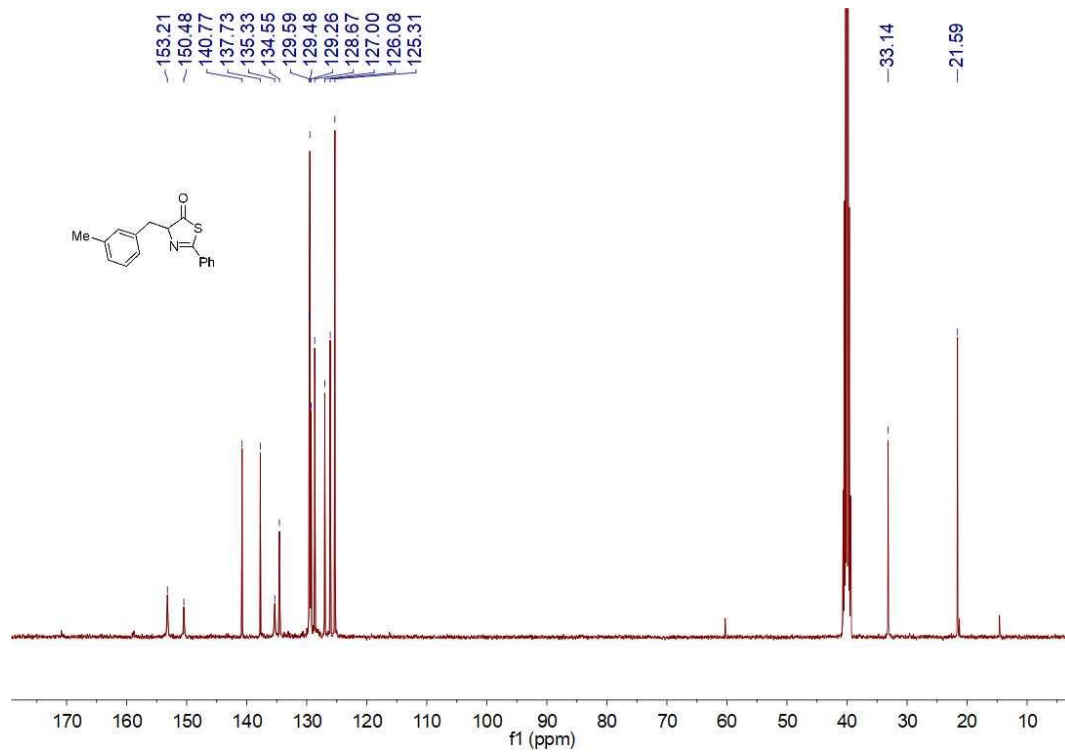

153.21  
150.48  
140.77  
137.73  
135.33  
134.55  
129.59  
129.48  
129.26  
128.67  
127.00  
126.08  
125.31

-33.14

-21.59

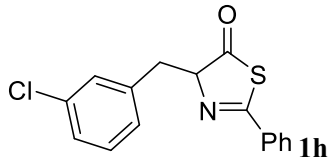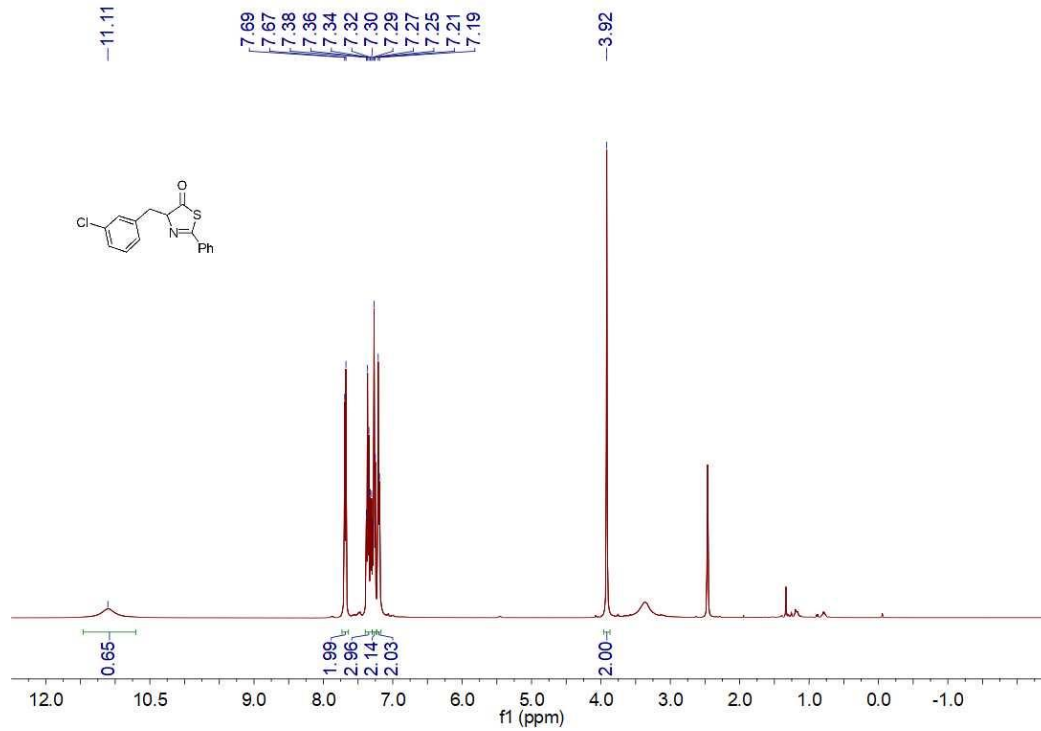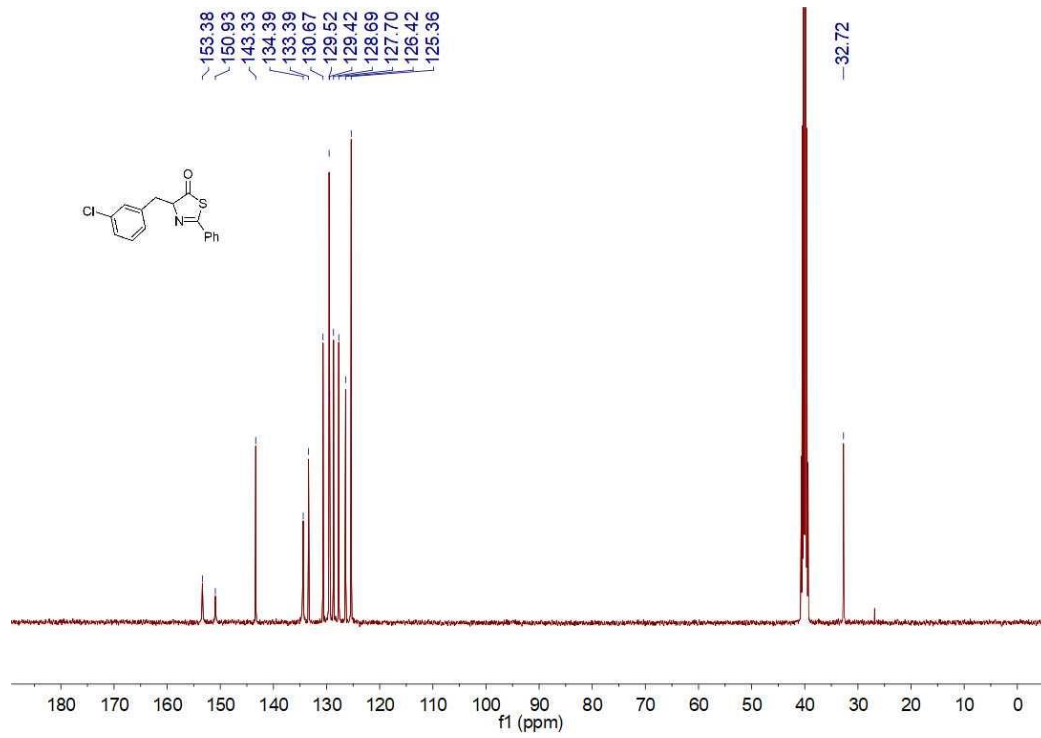

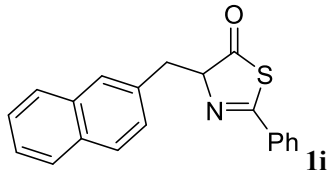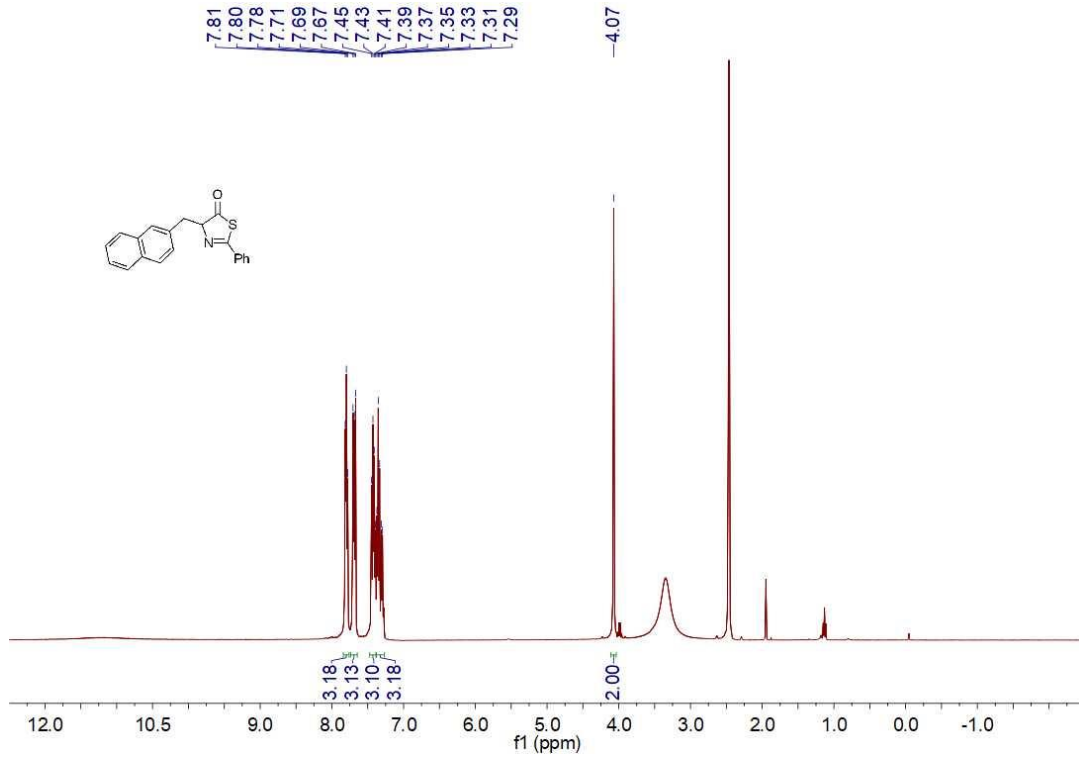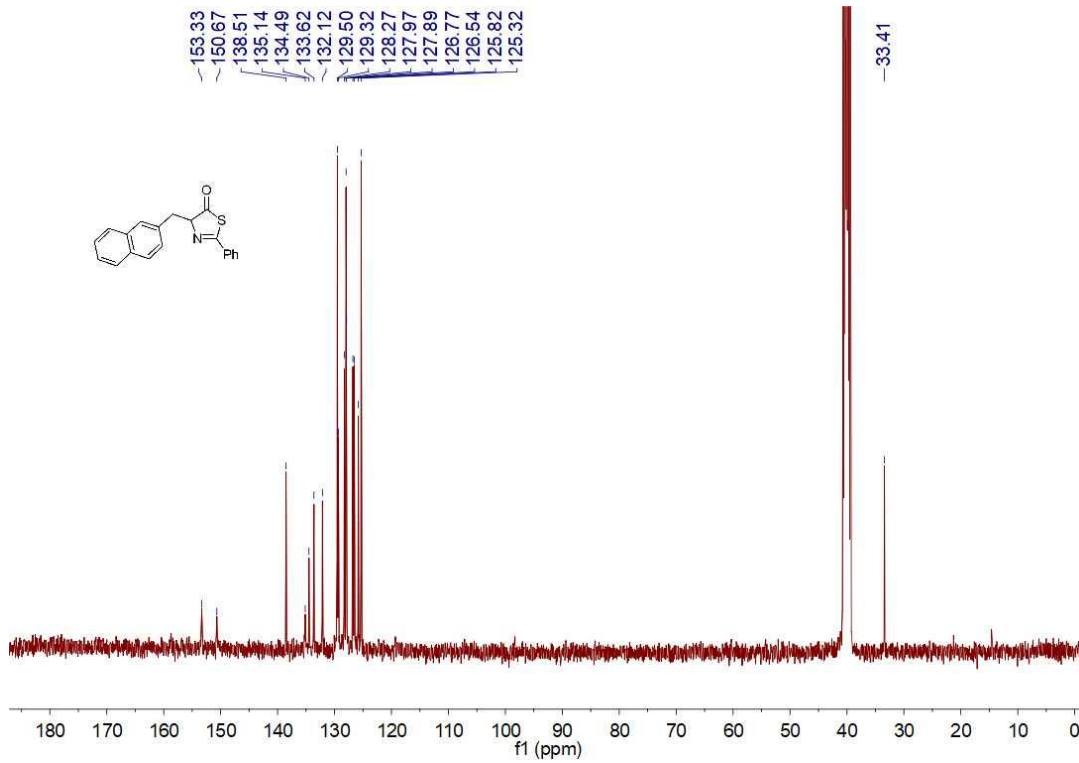

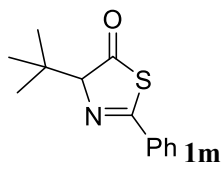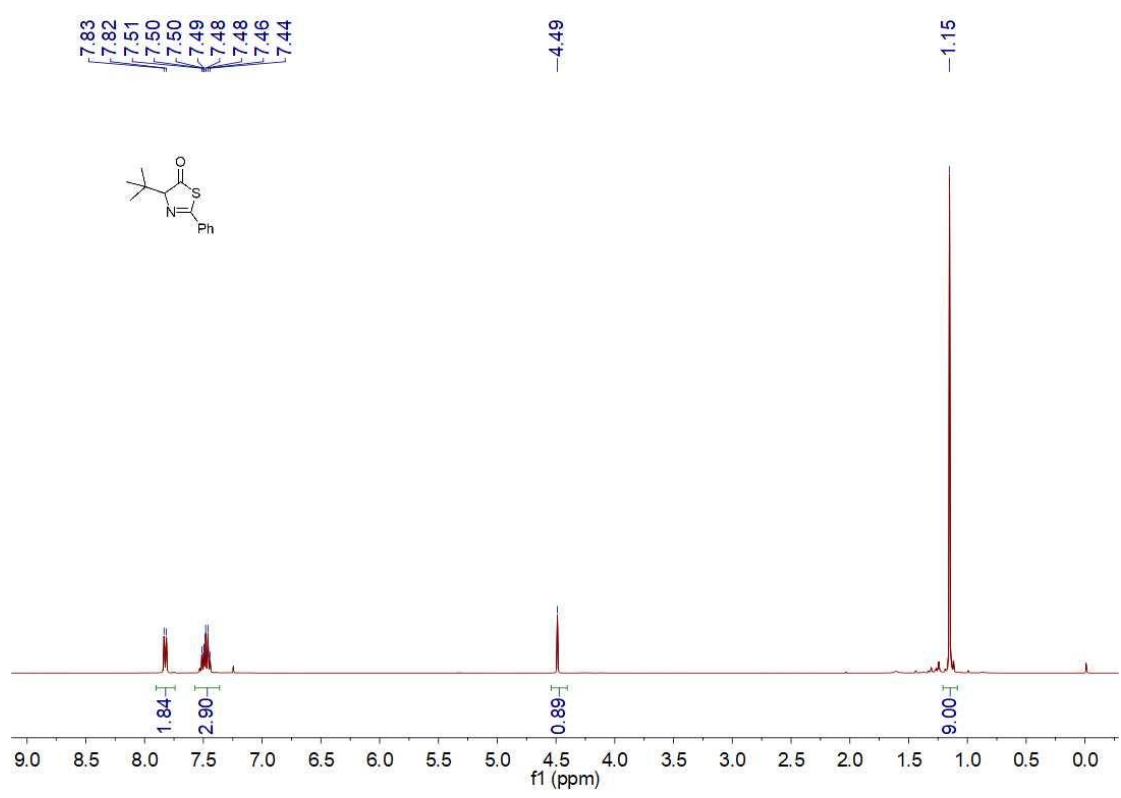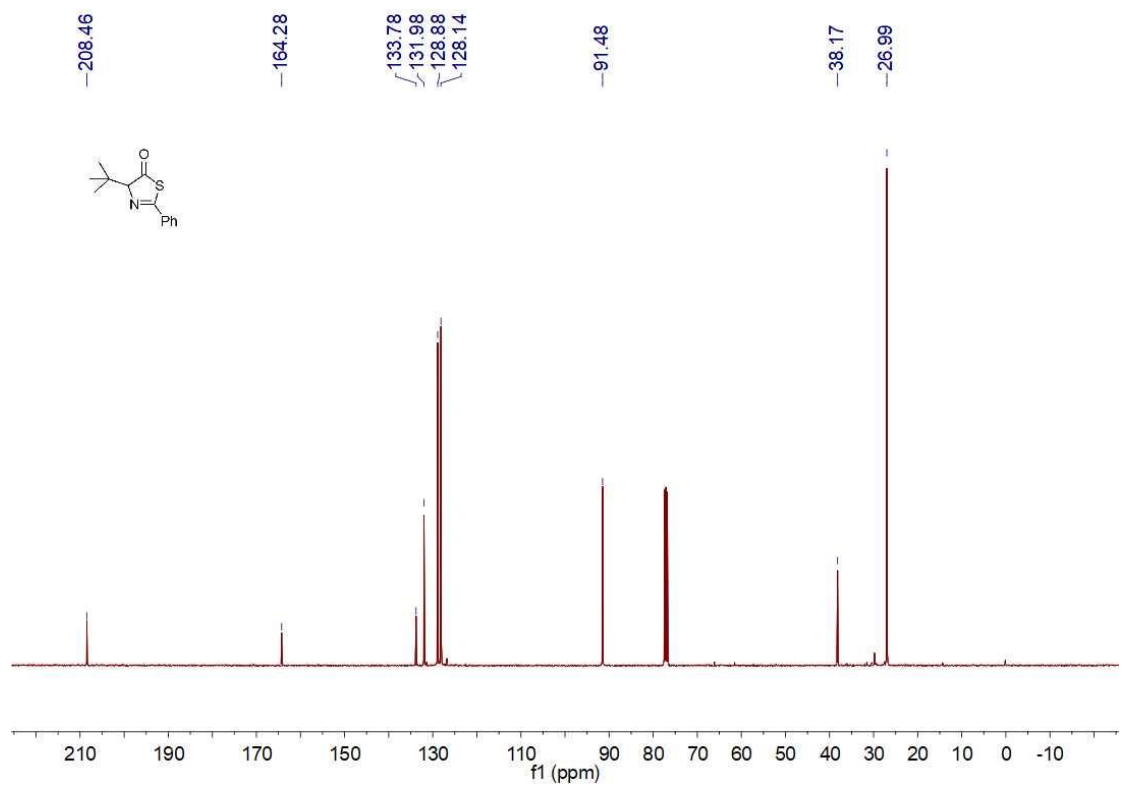



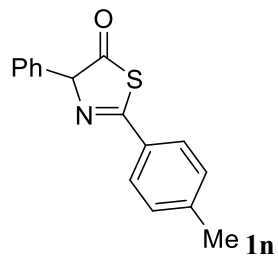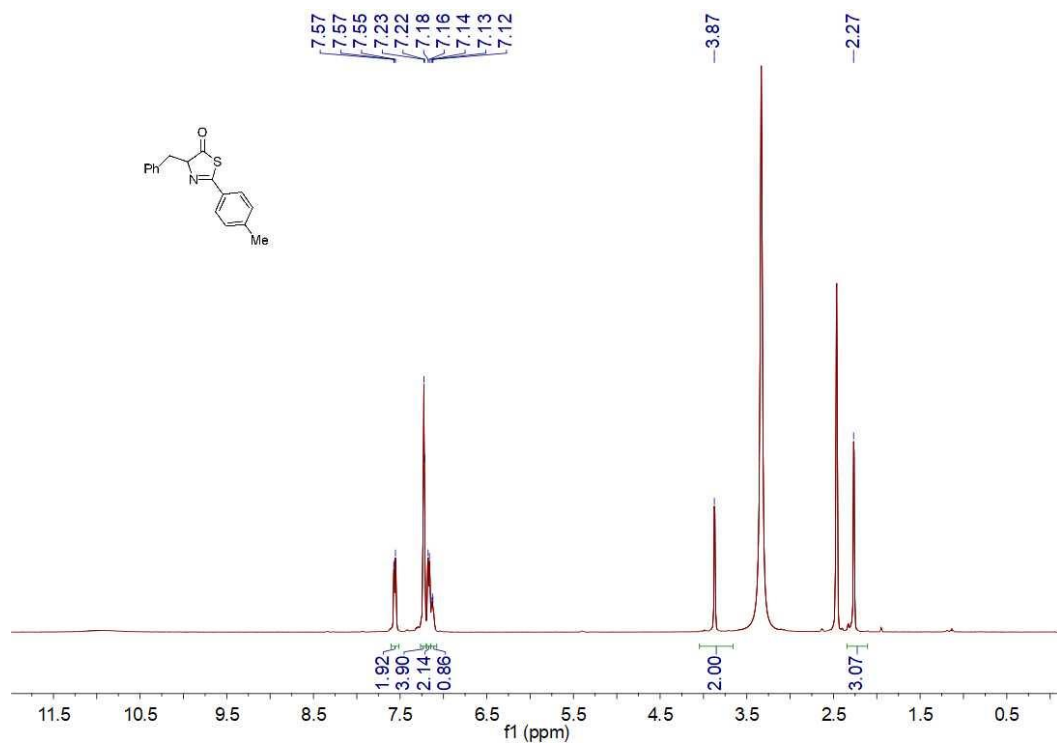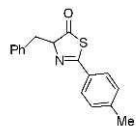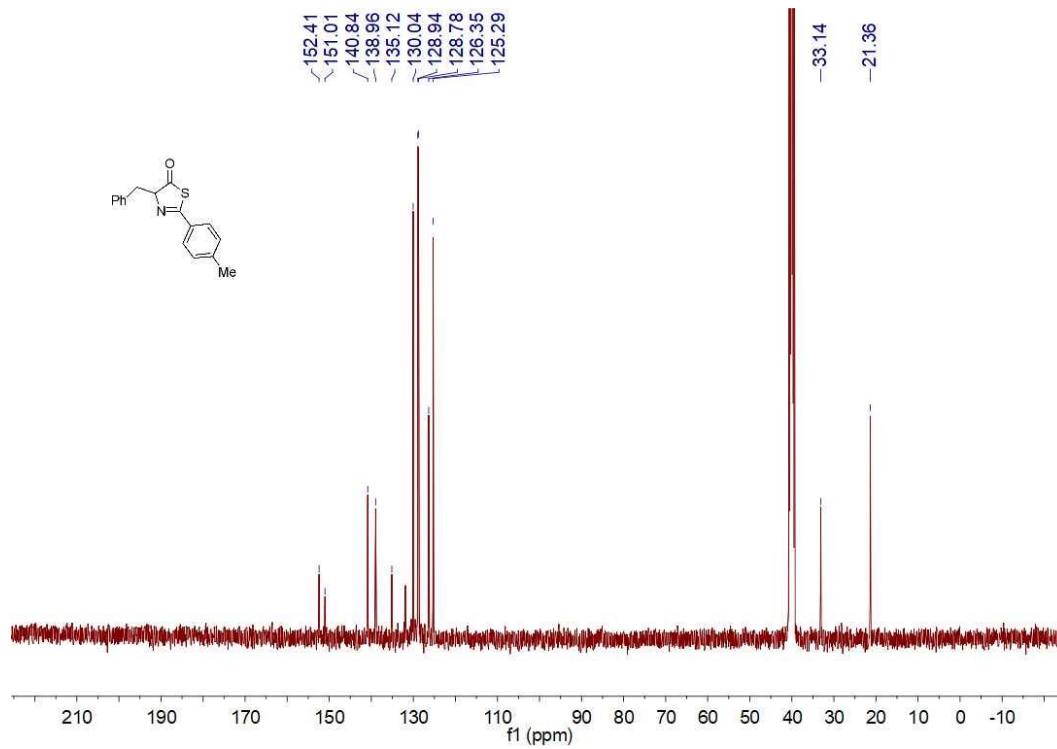

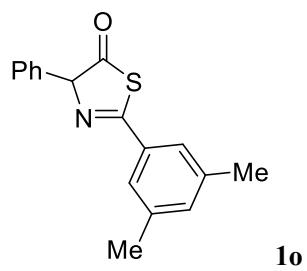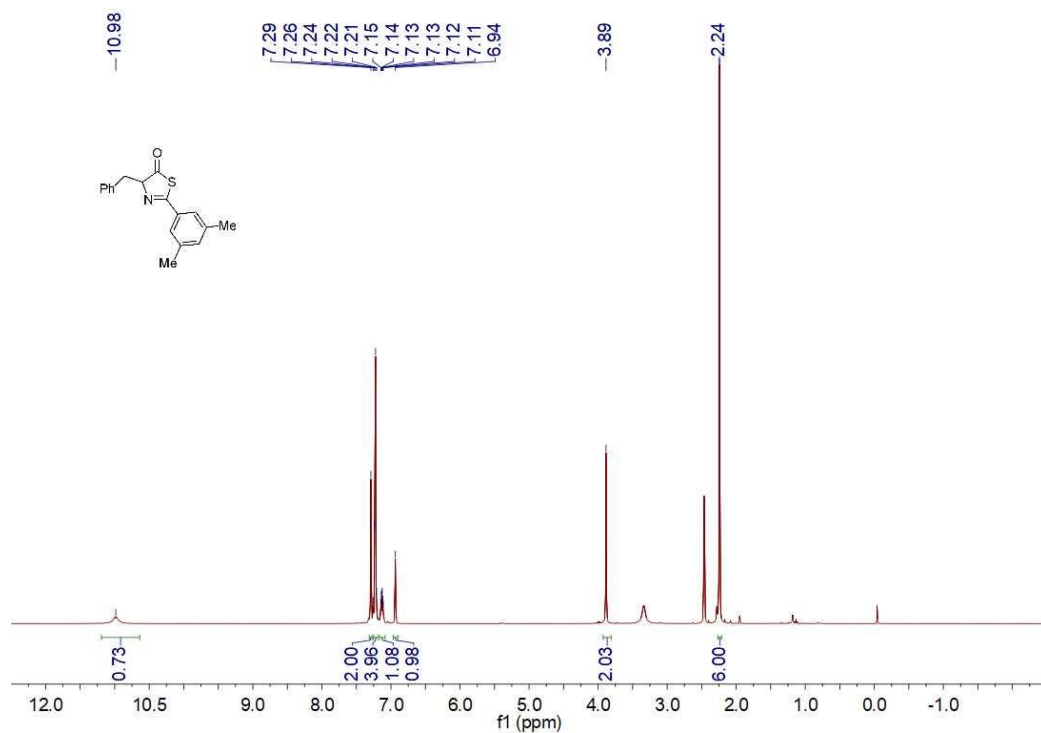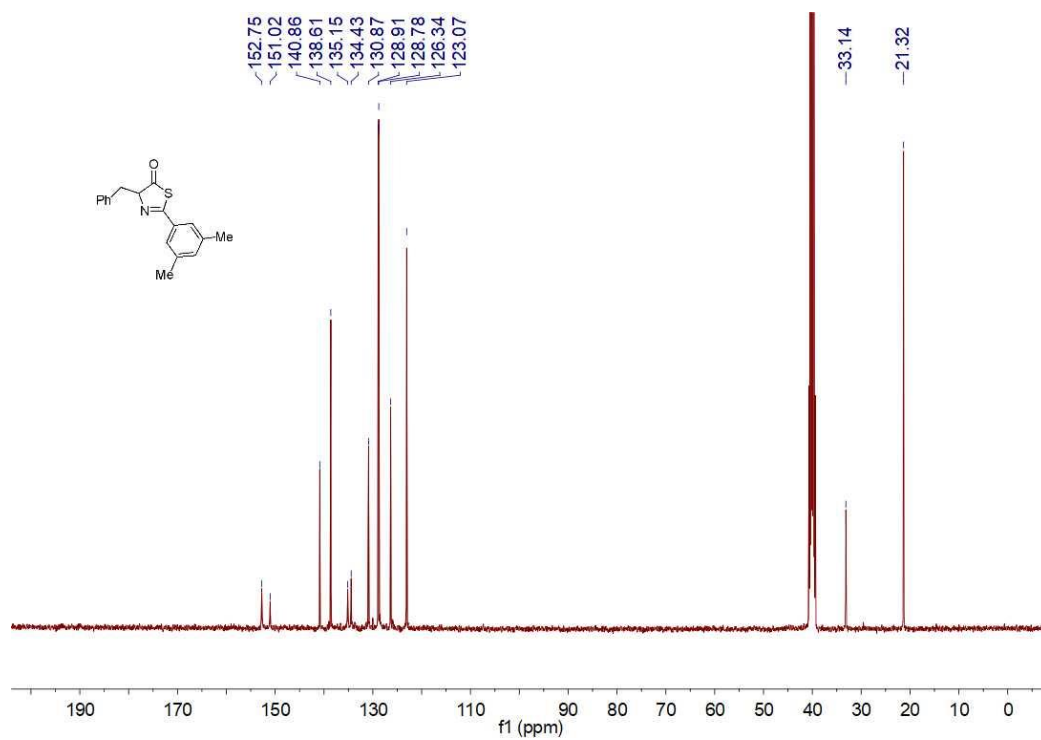

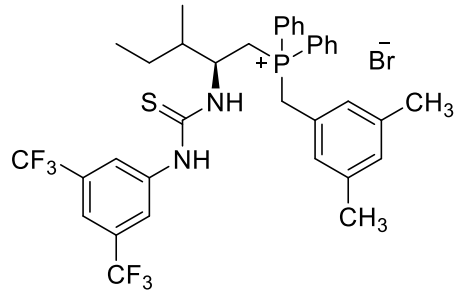

**H**

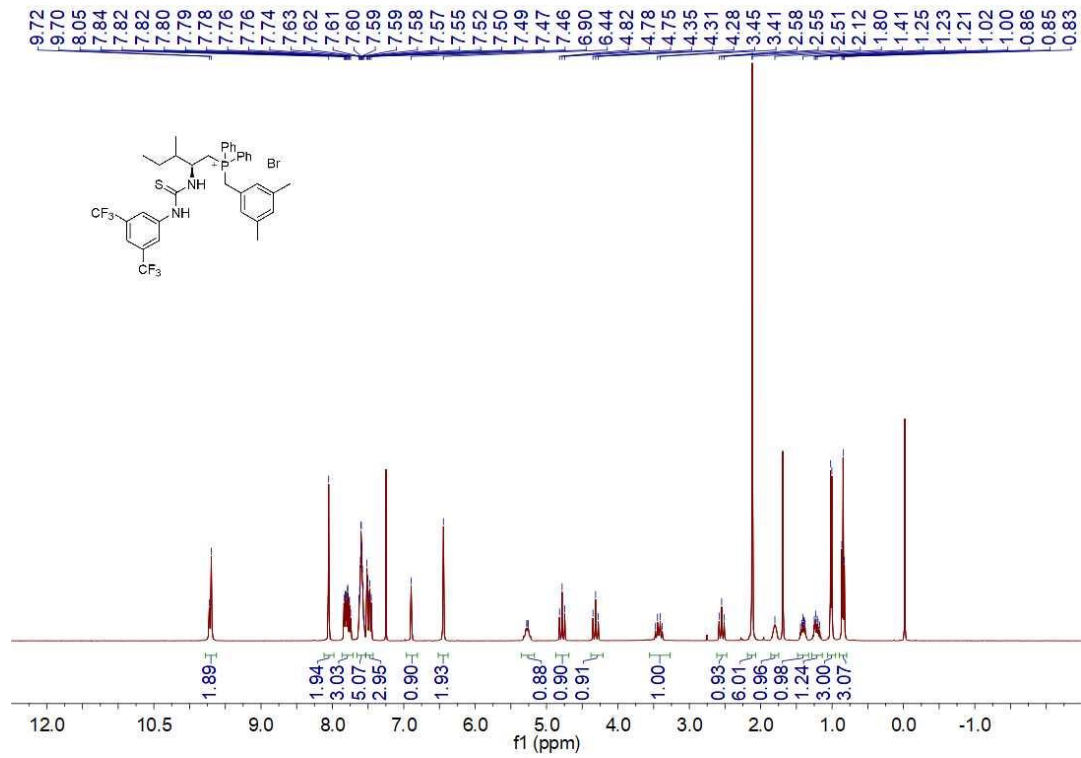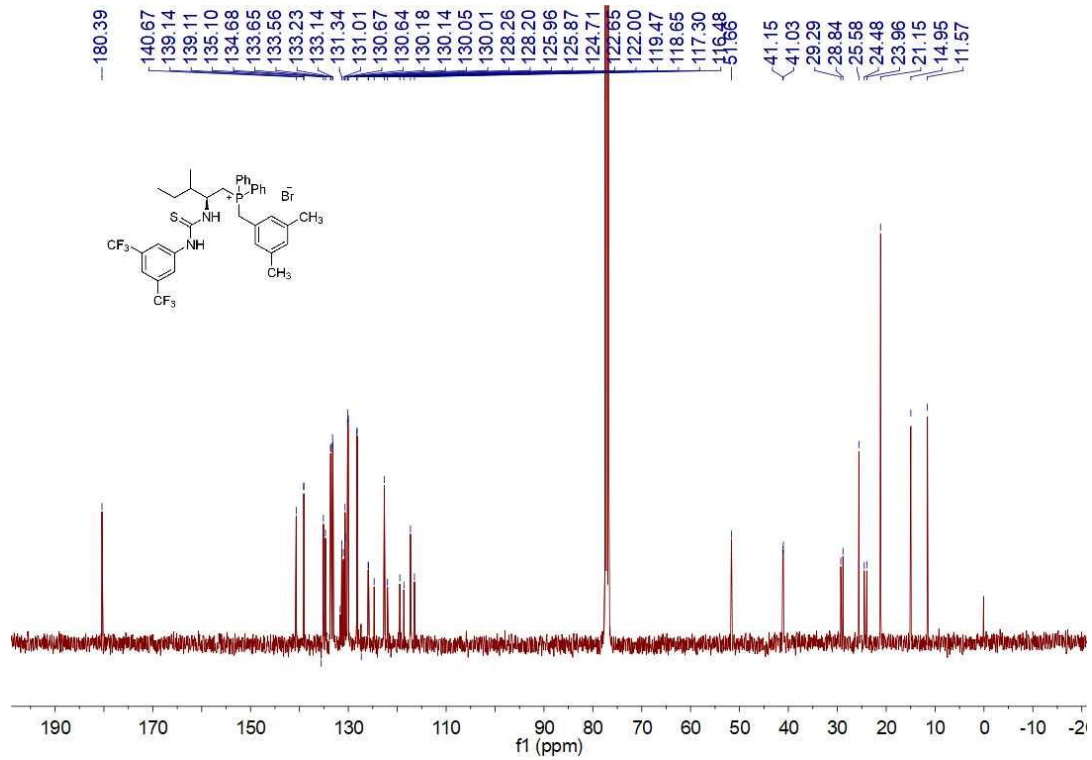

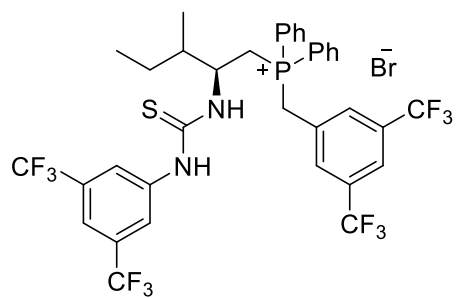

**I**

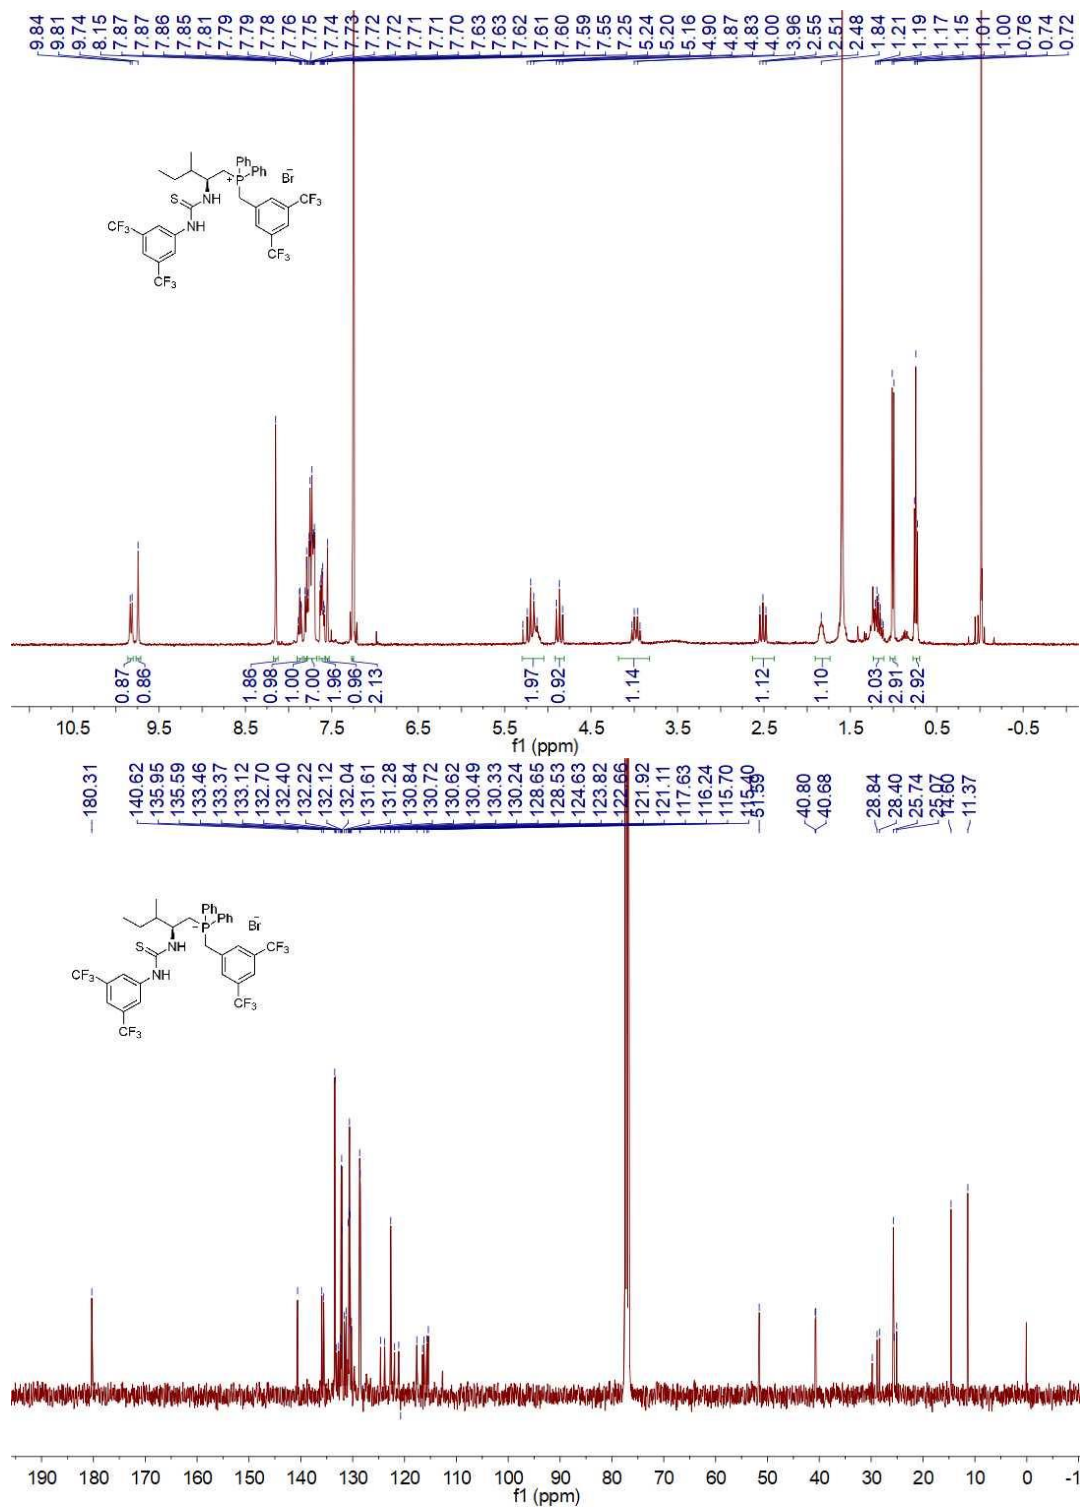

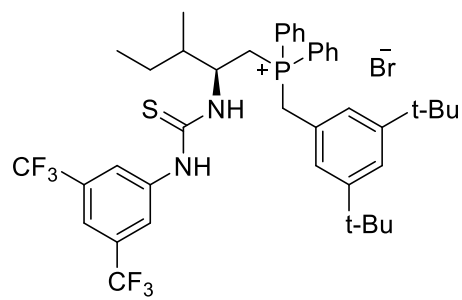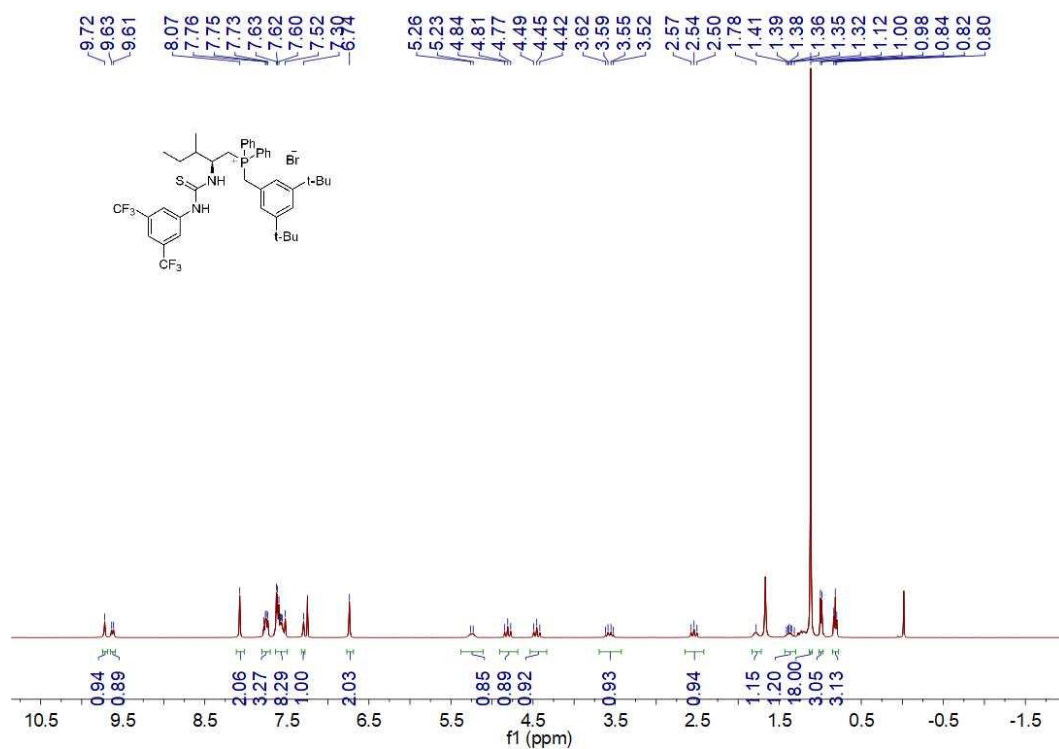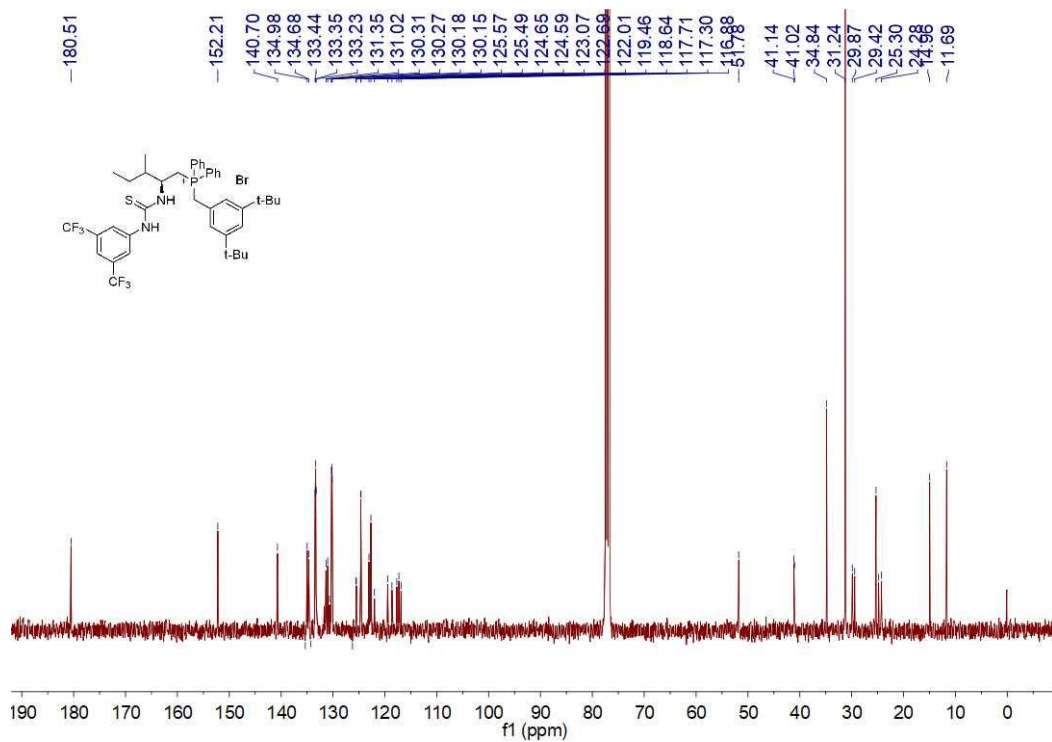

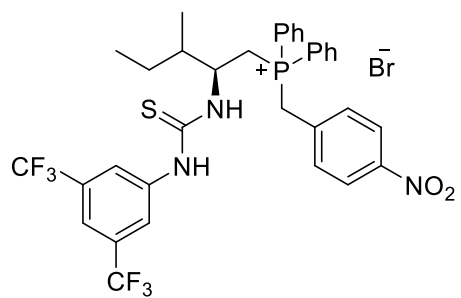

9.91  
9.61  
9.58  
8.14  
7.97  
7.95  
7.87  
7.85  
7.84  
7.83  
7.81  
7.73  
7.71  
7.71  
7.70  
7.69  
7.68  
7.59  
7.58  
7.57  
7.56  
7.55  
7.54  
7.52  
7.14  
7.14  
7.12  
7.12  
5.26  
5.22  
5.19  
4.81  
4.78  
4.74  
3.90  
3.86  
2.59  
2.04  
1.23  
1.22  
1.20  
1.20  
1.19  
1.17  
1.15  
1.00  
0.99  
0.74  
0.72  
0.70

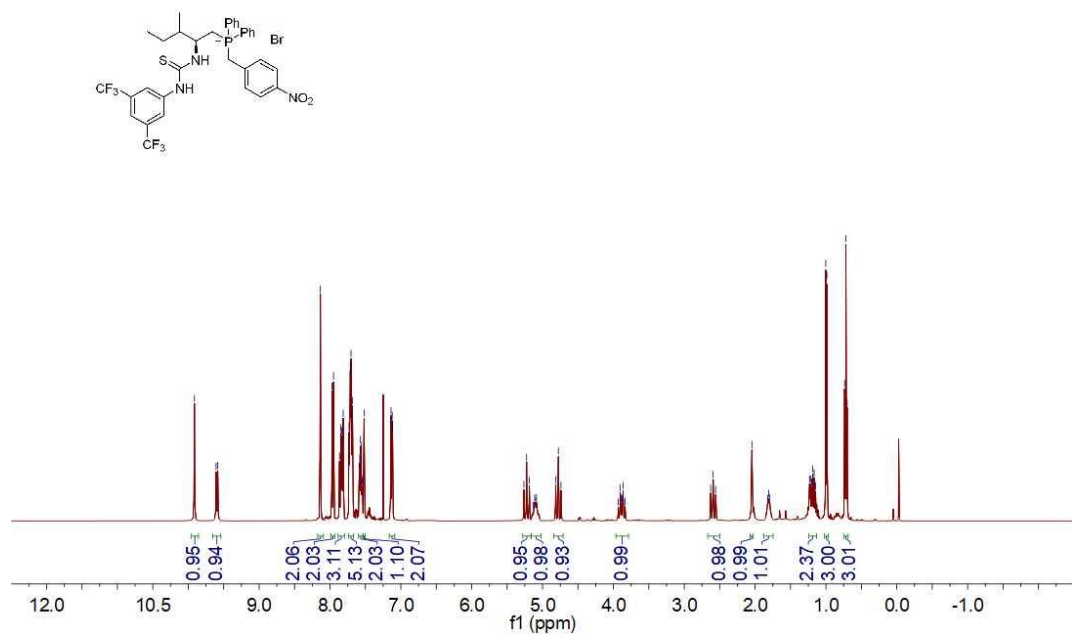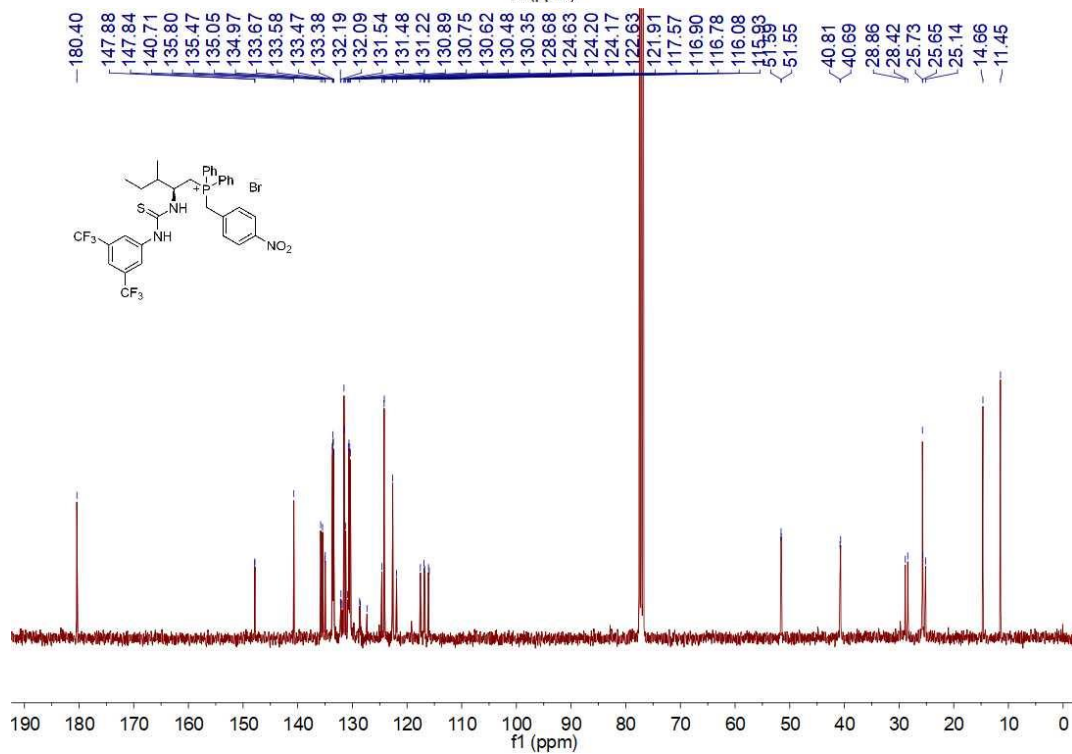

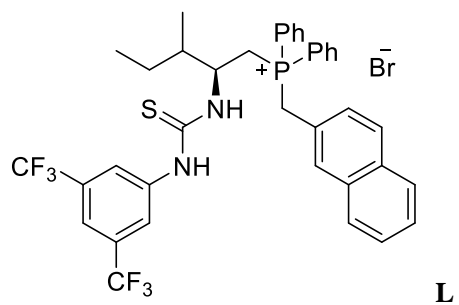

**L**

9.85  
9.65  
9.63  
8.08  
7.80  
7.78  
7.77  
7.76  
7.75  
7.75  
7.74  
7.73  
7.73  
7.63  
7.61  
7.60  
7.59  
7.57  
7.55  
7.54  
7.53  
7.52  
7.51  
7.49  
7.47  
7.46  
7.46  
7.44  
7.44  
7.40  
6.90  
6.88  
5.01  
4.97  
4.94  
4.77  
4.74  
4.70  
3.52  
3.48  
2.63  
2.60  
2.58  
1.23  
1.20  
0.98  
0.96  
0.80  
0.78  
0.77

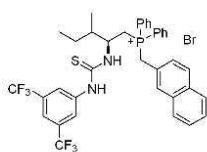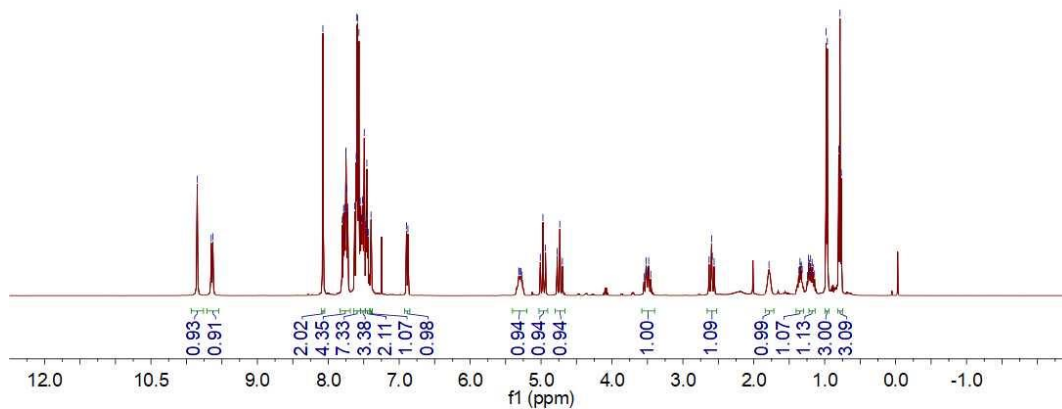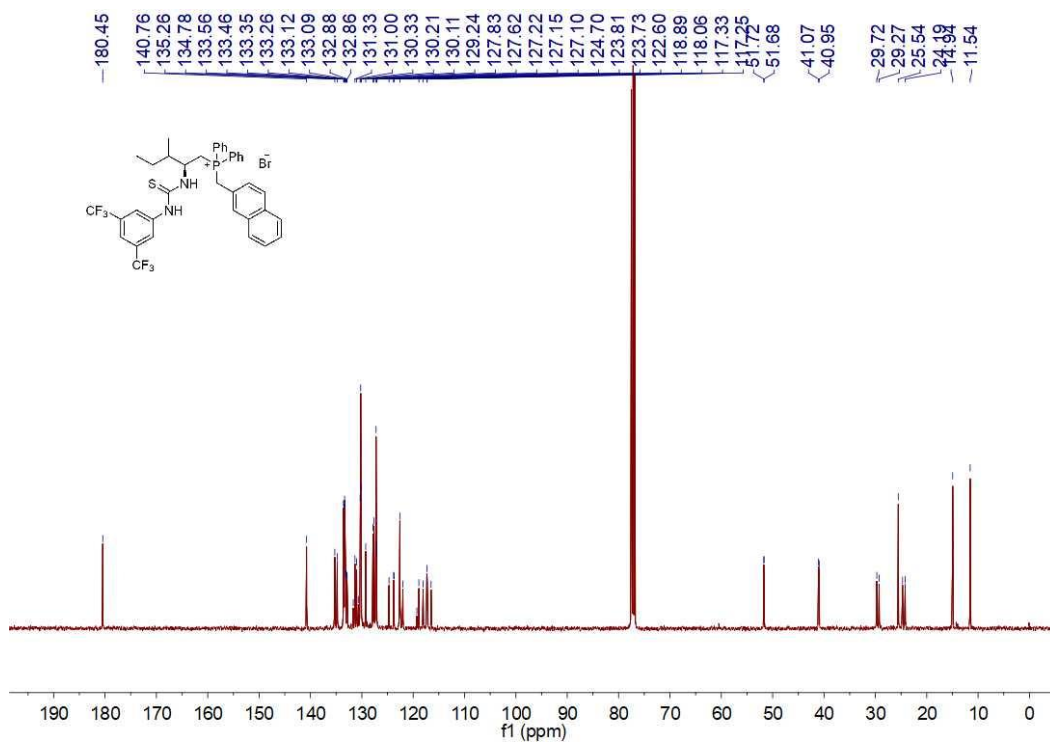

Supplement: d1ob00582k1.pdf [file d1ob00582k1.pdf]
